# Supplementary material for: Decarboxylative [3 + 2] cycloaddition of propargyl cyclic carbonates with C,O-bis(nucleophile)s to access dihydrofuro[3,2-c]coumarins and dihydronaphtho[1,2-b]furans with quaternary center
Source: Royal Society of Chemistry journal article supplement (doi:10.1039/d3ob01893h), 2024-01-01
Supplement: d3ob01893h1.pdf [file d3ob01893h1.pdf]

## Supplementary Information

### **Decarboxylative [3+2] Cycloaddition of Propargyl Cyclic Carbonates with C,O-bis(nucleophile)s to access Dihydrofuro[3,2-*c*]coumarins and Dihydronaphtho[1,2-*b*]furans with Quaternary Center**

Shravani Battula,<sup>a,b</sup> Pranay Kothuri,<sup>a</sup> Haripriya Bhumannagari<sup>a</sup> and Kiranmai Nayani<sup>a,b\*</sup>

<sup>a</sup>*Department of Organic Synthesis and Process Chemistry, CSIR-Indian Institute of Chemical Technology, Hyderabad 500007, Telangana, India*

<sup>b</sup>*Academy of Scientific and Innovative Research (AcSIR), Ghaziabad 201002, India*

\*E-mail: kiranmainayani@iict.res.in

## Table of Contents

|                                                                                                  |           |
|--------------------------------------------------------------------------------------------------|-----------|
| 1. General Information.....                                                                      | S3        |
| 2. Synthesis and Experimental Characterization of Compounds .....                                | S4-S28    |
| 2.1. General Procedure for Synthesis of Dihydrofuro[3,2- <i>c</i> ]coumarins <b>3</b> .....      | S4        |
| 2.2. Experimental and Characterization of Dihydrofuro[3,2- <i>c</i> ]coumarins <b>3a-w</b> ..... | S4-S18    |
| 2.3. Optimization of [3+2] Cycloaddition of $\alpha$ -Naphthol to Cyclic Carbonates.....         | S19       |
| 2.4. General Procedure for Dihydronaphtho[1,2- <i>b</i> ]furan <b>5</b> .....                    | S20       |
| 2.5. Experimental and Characterization of Dihydronaphtho[1,2- <i>b</i> ]furan <b>5a-j</b> .....  | S20-S26   |
| 2.6. Gram Scale Synthesis of Compounds <b>3a</b> and <b>5a</b> .....                             | S26-S27   |
| 2.7. Product Derivatization.....                                                                 | S27-S28   |
| 3. References.....                                                                               | S28       |
| 4. $^1\text{H}$ , $^{13}\text{C}$ and $^{19}\text{F}$ NMR Spectra of Compounds.....              | S29-S101  |
| 5. HPLC Chromatogram of Compounds .....                                                          | S102-S149 |
| 5.1. HPLC Chromatogram of Compounds <b>3a-w</b> .....                                            | S102-S144 |
| 5.2. HPLC Chromatogram of Compounds <b>5a</b> .....                                              | S145      |
| 5.3. HPLC Chromatogram of Gram-scale Reaction Products .....                                     | S146-S147 |
| 5.4. HPLC Chromatogram of Compounds <b>6</b> and <b>7</b> .....                                  | S148-S149 |
| 6. X-ray Crystallographic Data of Compound <b>3b</b> .....                                       | S150-S151 |

## 1. General Information

All chemicals have been purchased from commercial sources and were used without further purification unless otherwise noted. All solvents are reagent grade or HPLC grade. The synthetic transformations have been monitored by thin layer chromatography (TLC). TLC was performed on silica gel 60 F<sub>254</sub> plates (glass plates). Concentration under reduced pressure was performed by rotary evaporation below 45 °C. Column chromatography was performed using silica gel (100-200 mesh) packed in glass columns. Yields refer to spectroscopically pure compounds after isolation. <sup>1</sup>H, <sup>13</sup>C and <sup>19</sup>F NMR spectra were recorded in CDCl<sub>3</sub> and MeOH-*d*<sub>4</sub> using 400 or 500 MHz (<sup>1</sup>H), 100 or 125 MHz (<sup>13</sup>C) and 376 MHz (<sup>19</sup>F). Chemical shifts ( $\delta$ -values) are reported in ppm, spectra were calibrated related to solvents' residual proton chemical shifts (CDCl<sub>3</sub>,  $\delta$  = 7.26 ppm and MeOH-*d*<sub>4</sub>,  $\delta$  = 3.31 ppm) and solvents' residual carbon chemical shifts (CDCl<sub>3</sub>,  $\delta$  = 77.16 ppm and MeOH-*d*<sub>4</sub>,  $\delta$  = 49.01 ppm), multiplicity is reported as follows: s = singlet, brs = broad singlet, d = doublet, dd = doublet of doublet, t = triplet, td = triplet of doublet, m = multiplet or unresolved and coupling constant *J* in Hz. Melting points (mp) were determined in open capillaries and are uncorrected. Infrared spectra (IR) were recorded on a 0.1 mm KBr demountable cell. High-resolution mass spectra (HRMS) were obtained by electrospray ionization using a Q-TOF mass spectrometer in positive ion mode (M+H or M+Na) as indicated.

## 2. Synthesis and Experimental Characterization of Compounds

### 2.1 General Procedure for Synthesis of Dihydrofuro[3,2-*c*]coumarins (**3**)

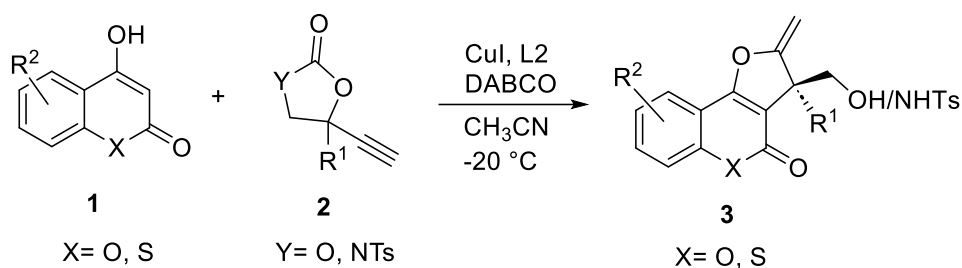

To a clean and dry round-bottom flask, under nitrogen atmosphere added dried CuI (1 mol%) and **L2** (2 mol%) in CH<sub>3</sub>CN (1 mL) solvent and stirred at 70 °C for 1 h and the resultant Copper-ligand complex was cooled to -20 °C and then added **1a-1g** (0.616 mmol, 1.0 equiv) followed by DABCO (0.092 mmol, 15 mol%) and cyclic carbonate<sup>1</sup> **2a-2j** (0.616 mmol, 1.0 equiv) dissolved in CH<sub>3</sub>CN (1 mL) was added slowly drop wise. The reaction was maintained and stirred at -20 °C for 4-8 h. After completion of reaction, the reaction mixture was concentrated under reduced pressure and the residue was purified by column chromatography on silica gel using 50% EtOAc/hexanes as eluent to afford the pure dihydrofuro[3,2-*c*]coumarin scaffolds **3**.

### 2.2. Experimental and Characterization of Dihydrofuro[3,2-*c*]coumarins (**3a-w**)

#### (*R*)-3-(Hydroxymethyl)-2-methylene-3-phenyl-2,3-dihydro-4*H*-furo[3,2-*c*]chromen-4-one (**3a**)

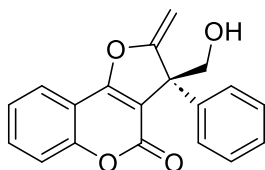

By following the general procedure, the reaction was performed with 4-hydroxycoumarin **1a** (100 mg, 0.616 mmol, 1.0equiv) and cyclic carbonate **2a** (116.06 mg, 0.616 mmol, 1.0 equiv) using CuI (1.17 mg, 1 mol %), **L2** (3.28 mg, 2 mol%) and DABCO (10.37 mg, 15 mol%) in acetonitrile (2 mL) at -20 °C under nitrogen atmosphere for 4 h. The residue was purified by column chromatography on silica gel (50% EtOAc/hexanes) to afford **3a** (185 mg, 98%) as a off-white solid. HPLC purity: 99:1 *er*.  $[\alpha]^{20} = -26$  ( $c = 0.4$ , CHCl<sub>3</sub>). mp 154-156 °C. <sup>1</sup>H NMR (400 MHz, CDCl<sub>3</sub>) δ 7.80 (d,  $J = 7.8$  Hz, 1H), 7.64 (t,  $J = 7.9$  Hz, 1H), 7.50 (d,  $J = 7.5$  Hz, 2H), 7.44 (d,  $J = 8.4$  Hz, 1H), 7.37 (m,  $J = 7.7$  Hz, 3H), 7.30 (d,  $J = 7.1$  Hz, 1H), 5.24 (d,  $J = 3.6$  Hz, 1H), 4.65 (d,  $J = 3.6$  Hz, 1H), 4.58 – 4.51 (q, 1H), 4.18 (dd,  $J = 11.2, 3.1$  Hz, 1H), 2.88 (dd,  $J = 9.1, 3.6$  Hz, 1H). <sup>13</sup>C NMR (100 MHz, CDCl<sub>3</sub>) δ 165.7,



164.5, 160.0, 155.2, 139.5, 133.2, 129.0, 127.8, 126.8, 124.54, 123.0, 117.2, 111.4, 107.7, 91.7, 67.4, 58.2. IR (thin film):  $\nu_{\max}/\text{cm}^{-1}$  3430, 3063, 3017, 2933, 2880, 1705, 1679, 1639, 1605, 1497, 1400, 1327, 1212, 1090, 1072, 979, 905, 850, 750, 697, 666, 635. HRMS (ESI):  $m/z$  calculated for  $[\text{M}+\text{H}]^+$   $\text{C}_{19}\text{H}_{15}\text{O}_4$ : 307.0970, found 307.0984.

**(R)-3-(Hydroxymethyl)-8-methyl-2-methylene-3-phenyl-2,3-dihydro-4H-furo[3,2-c]chromen-4-one (3b)**

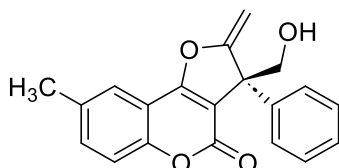

By following the general procedure, the reaction was performed with 6-methyl-4-hydroxycoumarin **1b** (100 mg, 0.567 mmol, 1.0 equiv) and cyclic carbonate **2a** (106.81 mg, 0.567 mmol, 1.0 equiv) using CuI (1.08 mg, 1 mol %), **L2** (3.02 mg, 2 mol %) and DABCO (9.55 mg, 15 mol%) in acetonitrile (2 mL) at  $-20\text{ }^{\circ}\text{C}$  under nitrogen atmosphere for 4 h. The residue was purified by flash column chromatography on silica gel (50% EtOAc/hexanes) to afford **3b** (171 mg, 94%) as an off white solid. HPLC purity: 95:5 *er.*  $[\alpha]^{20} = -19$  ( $c = 0.2$ ,  $\text{CHCl}_3$ ). mp  $136\text{--}138\text{ }^{\circ}\text{C}$ .  $^1\text{H}$  NMR (400 MHz,  $\text{CDCl}_3$ )  $\delta$  7.59 (s, 1H), 7.50 – 7.43 (m, 3H), 7.39 – 7.28 (m, 4H), 5.21 (d,  $J = 3.6$  Hz, 1H), 4.64 (d,  $J = 3.6$  Hz, 1H), 4.52 (td,  $J = 11.2, 9.3$  Hz, 1H), 4.18 (dd,  $J = 11.2, 3.7$  Hz, 1H), 2.96 (dd,  $J = 9.2, 3.7$  Hz, 1H), 2.46 (s, 3H).  $^{13}\text{C}$  NMR (125 MHz,  $\text{CDCl}_3$ )  $\delta$  165.8, 164.5, 160.3, 153.5, 134.5, 134.4, 129.0, 127.8, 126.8, 122.5, 117.0, 111.1, 107.7, 91.6, 67.5, 58.1, 21.0. IR (thin film):  $\nu_{\max}/\text{cm}^{-1}$  3426, 3070, 2932, 2865, 1683, 1633, 1572, 1497, 1432, 1309, 1202, 1080, 999, 895, 821, 762, 693, 653, 618. HRMS (ESI):  $m/z$  calculated for  $[\text{M}+\text{H}]^+$   $\text{C}_{20}\text{H}_{17}\text{O}_4$ : 321.1127, found 321.1143.

**(R)-8-Bromo-3-(hydroxymethyl)-2-methylene-3-phenyl-2,3-dihydro-4H-furo[3,2-c]chromen-4-one (3c)**

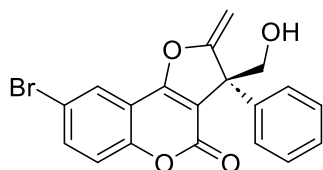

By following the general procedure, the reaction was performed with 6-bromo-4-hydroxycoumarin **1c** (100 mg, 0.414 mmol, 1.0 equiv) and cyclic carbonate **2a** (78.07 mg, 0.414 mmol, 1.0 equiv) using CuI (0.79 mg, 1 mol %), **L2** (2.21 mg, 2 mol %) and DABCO (6.98 mg, 15 mol%) in acetonitrile (2 mL) at  $-20\text{ }^{\circ}\text{C}$  under nitrogen atmosphere for 4 h. The residue was purified by flash column

chromatography on silica gel (50% EtOAc/hexanes) to afford **3c** (136 mg, 85%) as a pale-yellow semi solid. HPLC purity: >99:1 *er.*  $[\alpha]^{20} = -20.6$  ( $c = 0.2$ ,  $\text{CHCl}_3$ ).  $^1\text{H NMR}$  (400 MHz,  $\text{CDCl}_3$ )  $\delta$  7.93 (d,  $J = 2.3$  Hz, 1H), 7.71 (dd,  $J = 8.9, 2.4$  Hz, 1H), 7.48 (m,  $J = 5.3, 3.4$  Hz, 2H), 7.40 – 7.35 (m, 2H), 7.33 – 7.29 (m, 2H), 5.27 (d,  $J = 3.7$  Hz, 1H), 4.67 (d,  $J = 3.7$  Hz, 1H), 4.55 (dt,  $J = 7.2, 6.4$  Hz, 1H), 4.17 (dd,  $J = 11.2, 3.8$  Hz, 1H), 2.63 (dd,  $J = 9.0, 4.0$  Hz, 1H).  $^{13}\text{C NMR}$  (100 MHz,  $\text{CDCl}_3$ )  $\delta$  165.5, 163.8, 159.1, 153.9, 139.1, 136.0, 129.0, 127.9, 126.8, 125.5, 118.9, 117.3, 113.0, 108.6, 92.1, 67.1, 58.4. IR (thin film):  $\nu_{\text{max}}/\text{cm}^{-1}$  3468, 3066, 2924, 2854, 1813, 1708, 1639, 1560, 1489, 1422, 1381, 1263, 1211, 1105, 1063, 980, 907, 823, 756, 696, 638. HRMS (ESI):  $m/z$  calculated for  $[\text{M}+\text{H}]^+$   $\text{C}_{19}\text{H}_{14}\text{O}_4\text{Br}$ : 385.0075, found 385.0081.

**(R)-8-Fluoro-3-(hydroxymethyl)-2-methylene-3-phenyl-2,3-dihydro-4H-furo[3,2-c]chromen-4-one (3d)**

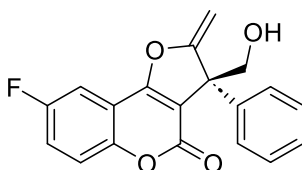

By following the general procedure, the reaction was performed with 6-fluoro-4-hydroxycoumarin **1d** (100 mg, 0.555 mmol, 1.0 equiv) and cyclic carbonate **2a** (104.40 mg, 0.555 mmol, 1.0 equiv) using  $\text{CuI}$  (1.05 mg, 1 mol %), **L2** (2.95 mg, 2 mol %) and DABCO (9.34 mg, 15 mol%) in acetonitrile (2 mL) at  $-20$  °C under nitrogen atmosphere for 4 h. The residue was purified by flash column chromatography on silica gel (50% EtOAc/hexanes) to afford **3d** (144 mg, 80%) as a pale-yellow semi solid. HPLC purity: >99:1 *er.*  $[\alpha]^{20} = -22.5$  ( $c = 0.2$ ,  $\text{CHCl}_3$ ).  $^1\text{H NMR}$  (400 MHz,  $\text{CDCl}_3$ )  $\delta$  7.48 – 7.42 (m, 3H), 7.39 (dd,  $J = 9.1, 4.3$  Hz, 1H), 7.34 (ddd,  $J = 9.6, 5.3, 1.5$  Hz, 3H), 7.28 (ddd,  $J = 8.4, 5.2, 2.7$  Hz, 1H), 5.24 (d,  $J = 3.7$  Hz, 1H), 4.65 (d,  $J = 3.7$  Hz, 1H), 4.53 (dd,  $J = 11.2, 9.0$  Hz, 1H), 4.15 (dd,  $J = 11.2, 4.0$  Hz, 1H), 2.66 (dd,  $J = 9.0, 4.0$  Hz, 1H).  $^{13}\text{C NMR}$  (150 MHz,  $\text{CDCl}_3$ )  $\delta$  165.5, 163.7, 159.5, (d,  $J_{\text{C-F}} = 8.6$  Hz),, 157.9, 151.4, 139.2, 129.0, 127.9, 126.8, 120.9 (d,  $J_{\text{C-F}} = 24.7$  Hz), 119.0 (d,  $J_{\text{C-F}} = 8.3$  Hz), 112.2, 108.6 (d,  $J_{\text{C-F}} = 25.3$  Hz), 92.1, 67.2, 58.4.  $^{19}\text{F NMR}$  (376 MHz,  $\text{CDCl}_3$ )  $\delta$  -115.88. IR (thin film):  $\nu_{\text{max}}/\text{cm}^{-1}$  3446, 3069, 2926, 2857, 1724, 1578, 1500, 1451, 1392, 1269, 1189, 1072, 988, 906, 821, 765, 699, 664. HRMS (ESI):  $m/z$  calculated for  $[\text{M}+\text{H}]^+$   $\text{C}_{19}\text{H}_{14}\text{O}_4\text{F}$  325.0876, found 325.0890.

**(R)-8-Chloro-3-(hydroxymethyl)-2-methylene-3-phenyl-2,3-dihydro-4H-furo[3,2-c]chromen-4-one (3e)**

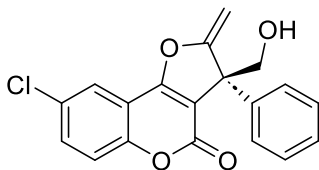

By following the general procedure, the reaction was performed with 6-chloro-4-hydroxycoumarin **1e** (100 mg, 0.508 mmol, 1.0 equiv) and cyclic carbonate **2a** (95.72 mg, 0.508 mmol, 1.0 equiv) using CuI (0.97 mg, 1 mol %), **L2** (2.71 mg, 2 mol %) and DABCO (8.55 mg, 15 mol%) in acetonitrile (2 mL) at -20 °C under nitrogen atmosphere for 4 h. The residue was purified by flash column chromatography on silica gel (50% EtOAc/hexanes) to afford **3e** (142 mg, 82%) as a pale-yellow semi solid. HPLC purity: >99:1 *er*.  $[\alpha]^{20} = -24.6$  ( $c = 0.5$ , CHCl<sub>3</sub>). <sup>1</sup>H NMR (400 MHz, CDCl<sub>3</sub>) δ 7.77 (d,  $J = 2.5$  Hz, 1H), 7.57 (dd,  $J = 8.9, 2.5$  Hz, 1H), 7.50 – 7.46 (m, 2H), 7.40 – 7.34 (m, 3H), 7.32 – 7.27 (m, 1H), 5.27 (d,  $J = 3.7$  Hz, 1H), 4.67 (d,  $J = 3.7$  Hz, 1H), 4.56 (dd,  $J = 11.2, 8.9$  Hz, 1H), 4.17 (dd,  $J = 11.2, 4.1$  Hz, 1H), 2.73 – 2.57 (m, 1H). <sup>13</sup>C NMR (100 MHz, CDCl<sub>3</sub>) δ 165.4, 163.3, 159.2, 153.5, 139.1, 133.2, 130.1, 129.0, 128.0, 126.8, 122.4, 118.6, 112.5, 108.5, 92.1, 67.1, 58.4. IR (thin film):  $\nu_{\max}/\text{cm}^{-1}$  3440, 3068, 2926, 2856, 1723, 1642, 1565, 1492, 1426, 1384, 1263, 1210, 1111, 1066, 966, 910, 825, 738, 698, 654. HRMS (ESI):  $m/z$  calculated for [M+H]<sup>+</sup> C<sub>19</sub>H<sub>14</sub>O<sub>4</sub>Cl: 341.0581, found 341.0593.

**(R)-3-(hydroxymethyl)-2-methylene-3-(naphthalen-1-yl)-2,3-dihydro-4H-furo[3,2-c]chromen-4-one (3f)**

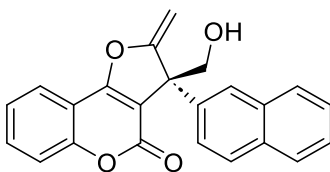

By following the general procedure, the reaction was performed with 4-hydroxycoumarin **1a** (100 mg, 0.616 mmol, 1.0 equiv) and naphthyl substituted cyclic carbonate **2b** (146.93 mg, 0.616 mmol, 1.0 equiv) using CuI (1.17 mg, 1 mol %), **L2** (3.28 mg, 2 mol%) and DABCO (10.377 mg, 15 mol%) in acetonitrile (2 mL) at -20 °C under nitrogen atmosphere for 4 h. The residue was purified by column chromatography on silica gel (50% EtOAc/hexanes) to afford **3f** (216 mg, 98%) as an off-white solid. HPLC purity: >99:1 *er*.  $[\alpha]^{20} = -21.5$  ( $c = 0.4$ , CHCl<sub>3</sub>). mp 119-120 °C. <sup>1</sup>H NMR (500 MHz, CDCl<sub>3</sub>)

$\delta$  7.94 (d,  $J = 1.7$  Hz, 1H), 7.86 – 7.79 (m, 4H), 7.69 – 7.63 (m, 1H), 7.58 (dd,  $J = 8.7, 2.0$  Hz, 1H), 7.49 – 7.44 (m, 3H), 7.42 – 7.37 (m, 1H), 5.26 (d,  $J = 3.7$  Hz, 1H), 4.69 – 4.63 (m, 2H), 4.29 (dd,  $J = 11.2, 3.8$  Hz, 1H), 2.95 (dd,  $J = 9.1, 3.8$  Hz, 1H).  $^{13}\text{C}$  NMR (100 MHz,  $\text{CDCl}_3$ )  $\delta$  165.8, 164.7, 160.1, 155.3, 136.9, 133.3, 132.7, 128.8, 128.3, 127.5, 126.4, 125.8, 124.7, 124.6, 117.3, 111.5, 107.9, 92.0, 67.5, 58.2. IR (thin film):  $\nu_{\text{max}}/\text{cm}^{-1}$  3417, 3316, 3198, 2754, 2635, 2347, 1683, 1634, 1497, 1398, 1276, 1212, 1061, 968, 902, 823, 750, 643. HRMS (ESI):  $m/z$  calculated for  $[\text{M}+\text{H}]^+$   $\text{C}_{23}\text{H}_{17}\text{O}_4$ : 357.1127, found 357.1135.

**(R)-3-(Hydroxymethyl)-8-methyl-2-methylene-3-(naphthalen-2-yl)-2,3-dihydro-4H-furo[3,2-c]chromen-4-one (3g)**

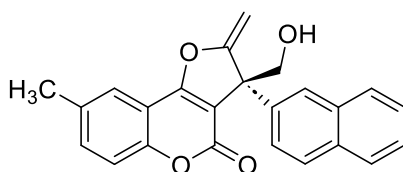

By following the general procedure, the reaction was performed with 6-methyl-4-hydroxycoumarin **1b** (100 mg, 0.567 mmol, 1.0 equiv) and naphthyl substituted cyclic carbonate **2b** (135.23 mg, 0.567 mmol, 1.0 equiv) using CuI (1.08 mg, 1 mol %), **L2** (3.02 mg, 2 mol %) and DABCO (9.55 mg, 15 mol%) in acetonitrile (2 mL) at  $-20$  °C under nitrogen atmosphere for 4 h. The residue was purified by flash column chromatography on silica gel (50% EtOAc/hexanes) to afford **3g** (202 mg, 96%) off white solid. HPLC purity: >99:1 *er.*  $[\alpha]^{20} = -22.6$  ( $c = 0.3$ ,  $\text{CHCl}_3$ ). mp 98-100 °C.  $^1\text{H}$  NMR (400 MHz,  $\text{CDCl}_3$ )  $\delta$  7.92 (d,  $J = 1.7$  Hz, 1H), 7.82 (m,  $J = 8.8, 4.5$  Hz, 3H), 7.62 (s, 1H), 7.57 (dd,  $J = 8.7, 2.0$  Hz, 1H), 7.49 – 7.44 (m, 3H), 7.35 (d,  $J = 8.6$  Hz, 1H), 5.23 (d,  $J = 3.7$  Hz, 1H), 4.69 – 4.61 (m, 2H), 4.29 (dd,  $J = 11.2, 3.5$  Hz, 1H), 3.06 (dd,  $J = 9.2, 3.6$  Hz, 1H), 2.47 (s, 3H).  $^{13}\text{C}$  NMR (100 MHz,  $\text{CDCl}_3$ )  $\delta$  165.8, 164.67, 160.3, 153.5, 136.9, 134.5, 134.4, 133.3, 132.7, 128.8, 128.3, 127.5, 126.3, 125.8, 124.7, 122.6, 117.0, 111.2, 107.8, 91.7, 67.6, 58.7, 20.9. IR (thin film):  $\nu_{\text{max}}/\text{cm}^{-1}$  3413, 3307, 3040, 2925, 2866, 2340, 1682, 1638, 1571, 1498, 1429, 1387, 1203, 1060, 974, 905, 814, 741, 647. HRMS (ESI):  $m/z$  calculated for  $[\text{M}+\text{H}]^+$   $\text{C}_{24}\text{H}_{19}\text{O}_4$  371.1283, found 371.1297.

**(R)-3-(Hydroxymethyl)-7-methyl-2-methylene-3-phenyl-2,3-dihydro-4H-furo[3,2-c]chromen-4-one (3h)**

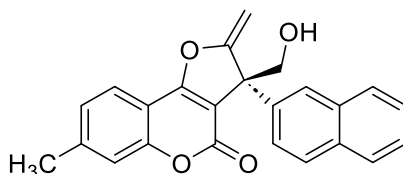

By following the general procedure, the reaction was performed with 7-methyl-4-hydroxycoumarin **1f** (100 mg, 0.567 mmol, 1.0 equiv) and naphthyl substituted cyclic carbonate **2b** (135.23 mg, 0.567 mmol, 1.0 equiv) using CuI (1.08 mg, 1 mol %), **L2** (3.02 mg, 2 mol %) and DABCO (9.55 mg, 15 mol%) in acetonitrile (2 mL) at -20 °C under nitrogen atmosphere for 4 h. The residue was purified by flash column chromatography on silica gel (50% EtOAc/hexanes) to afford **3h** (178 mg, 98%) as a pale-yellow semi solid. HPLC purity: 98:2 *er*.  $[\alpha]^{20} = -24.6$  ( $c = 0.4$ , CHCl<sub>3</sub>). <sup>1</sup>H NMR (400 MHz, CDCl<sub>3</sub>)  $\delta$  7.93 (d,  $J = 1.6$  Hz, 1H), 7.86 – 7.78 (m, 4H), 7.71 (d,  $J = 8.0$  Hz, 1H), 7.58 (dd,  $J = 8.7$ , 1.9 Hz, 1H), 7.49 – 7.45 (m, 2H), 7.23 – 7.20 (m, 1H), 5.23 (d,  $J = 3.6$  Hz, 1H), 4.76 – 4.52 (m, 2H), 4.28 (dd,  $J = 11.2$ , 3.7 Hz, 1H), 3.05 (dd,  $J = 9.2$ , 3.7 Hz, 1H), 2.51 (s, 3H). <sup>13</sup>C NMR (100 MHz, CDCl<sub>3</sub>)  $\delta$  166.0, 165.0, 160.5, 155.5, 145.0, 137.1, 133.4, 132.8, 128.9, 128.4, 127.6, 126.4, 126.0, 124.9, 122.8, 120.7, 117.5, 109.0, 107.0, 91.8, 67.7, 58.1, 22.2. IR (thin film):  $\nu_{\max}/\text{cm}^{-1}$  3421, 3056, 3015, 2925, 2855, 1707, 1678, 1636, 1599, 1513, 1401, 1327, 1217, 1154, 1065, 1017, 945, 858, 816, 754, 665. HRMS (ESI):  $m/z$  calculated for  $[\text{M}+\text{H}]^+$  C<sub>24</sub>H<sub>19</sub>O<sub>4</sub> 371.1283, found 371.1293.

**(R)-8-Bromo-3-(hydroxymethyl)-2-methylene-3-(naphthalen-2-yl)-2,3-dihydro-4H-furo[3,2-c]chromen-4-one (3i)**

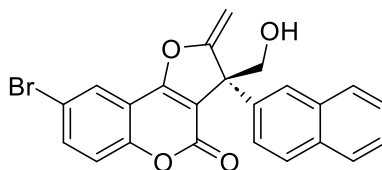

By following the general procedure, the reaction was performed with 6-bromo-4-hydroxycoumarin **1c** (100 mg, 0.414 mmol, 1.0 equiv) and naphthyl substituted cyclic carbonate **2b** (98.83 mg, 0.414 mmol, 1.0 equiv) using CuI (0.790 mg, 1 mol %), **L2** (2.21 mg, 2 mol %) and DABCO (6.98 mg, 15 mol%) in acetonitrile (2 mL) at -20 °C under nitrogen atmosphere for 4 h. The residue was purified by flash column chromatography on silica gel (50% EtOAc/hexanes) to afford **3i** (159 mg, 88%) as a pale-yellow semi solid. HPLC purity: 99:1 *er*.  $[\alpha]^{20} = -24.5$  ( $c = 0.4$ , CHCl<sub>3</sub>). mp 98-100 °C. <sup>1</sup>H NMR (400 MHz, CDCl<sub>3</sub>)  $\delta$  7.96 (d,  $J = 2.3$  Hz, 1H), 7.91 (d,  $J = 1.6$  Hz, 1H), 7.82 (td,  $J = 8.5$ , 4.8 Hz, 4H), 7.73 (dd,  $J = 8.9$ , 2.4 Hz, 1H), 7.57 (dd,  $J = 8.7$ , 2.0 Hz, 1H), 7.50 – 7.46 (m, 2H), 7.32 (d,  $J = 8.9$  Hz, 1H), 5.29 (d,  $J = 3.7$  Hz, 1H), 4.72 – 4.62 (m, 3H), 4.29 (dd,  $J = 11.2$ , 4.0 Hz, 1H), 2.73 (dd,  $J = 8.9$ , 4.0 Hz, 1H). <sup>13</sup>C NMR (100 MHz, CDCl<sub>3</sub>)  $\delta$  165.5, 163.3, 159.2, 154.0, 136.5, 136.1, 133.3, 132.73, 128.9, 128.3, 127.5, 126.5, 125.8, 125.5, 124.6, 11.0, 117.3, 113.1, 108.7, 92.3, 67.2, 58.4. IR (thin film):  $\nu_{\max}/\text{cm}^{-1}$  3363, 3190, 3029, 2925, 2790, 2313, 1713, 1637, 1557, 1487, 1378, 1263, 1209,

1103, 1059, 965, 906, 817, 757, 662. HRMS (ESI):  $m/z$  calculated for  $[M+H]^+$   $C_{23}H_{16}O_4Br$ : 435.0232, found 435.0234.

**(R)-3-(hydroxymethyl)-7-methoxy-2-methylene-3-(naphthalen-2-yl)-2,3-dihydro-4H-furo[3,2-c]chromen-4-one (3j)**

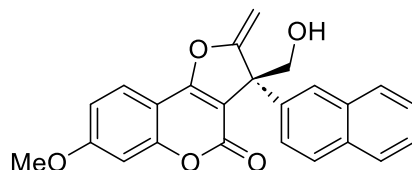

By following the general procedure, the reaction was performed with 7-methoxy-4-hydroxycoumarin **1g** (100 mg, 0.521 mmol, 1.0 equiv) and naphthyl substituted cyclic carbonate **2b** (124.06 mg, 0.521 mmol, 1.0 equiv) using CuI (0.99 mg, 1 mol %), **L2** (2.78 mg, 2 mol %) and DABCO (8.76 mg, 15 mol%) in acetonitrile (2 mL) at -20 °C under nitrogen atmosphere for 4 h. The residue was purified by flash column chromatography on silica gel (50% EtOAc/hexanes) to afford **3j** (197 mg, 98%) as a off white solid. HPLC purity: >99:1.  $[\alpha]^{20} = -22.66$  ( $c = 0.4$ ,  $CHCl_3$ ). mp 134-137 °C.  $^1H$  NMR (400 MHz,  $CDCl_3$ )  $\delta$  7.93 (d,  $J = 1.9$  Hz, 1H), 7.82 (ddd,  $J = 9.4, 6.6, 4.1$  Hz, 3H), 7.72 (d,  $J = 8.7$  Hz, 1H), 7.58 (dd,  $J = 8.7, 2.0$  Hz, 1H), 7.49 – 7.45 (m, 2H), 6.98 – 6.92 (m, 2H), 5.22 (d,  $J = 3.6$  Hz, 1H), 4.67 – 4.59 (m, 2H), 4.28 (dd,  $J = 10.3, 4.5$  Hz, 1H), 3.91 (s, 3H), 3.05 (dd,  $J = 9.1, 3.8$  Hz, 1H).  $^{13}C$  NMR (125 MHz,  $CDCl_3$ )  $\delta$  165.9, 165.1, 164.1, 160.5, 157.4, 137.2, 133.3, 132.7, 128.8, 128.3, 127.5, 126.3, 125.7, 124.8, 124.0, 113.3, 104.8, 104.6, 101.0, 91.6, 67.7, 67.6, 58.0, 55.9. IR (thin film):  $\nu_{max}/cm^{-1}$  3432, 3063, 2939, 2885, 1717, 1625, 1607, 1435, 1389, 1343, 1255, 1098, 1084, 975, 905, 879, 795, 737, 695. HRMS (ESI):  $m/z$  calculated for  $[M+H]^+$   $C_{24}H_{19}O_5$ : 387.1233, found 387.1226.

**(R)-3-(hydroxymethyl)-9-methoxy-2-methylene-3-phenyl-2,3-dihydro-4H-furo[3,2-c]chromen-4-one (3k)**

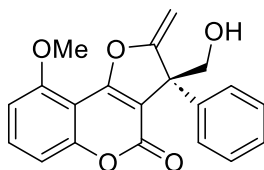

By following the general procedure, the reaction was performed with 5-methoxy-4-hydroxycoumarin **1h** (100 mg, 0.521 mmol, 1.0 equiv) and cyclic carbonate **2a** (98 mg, 0.521 mmol, 1.0 equiv) using CuI (0.99 mg, 1 mol %), **L2** (2.78 mg, 2 mol %) and DABCO (8.76 mg, 15 mol%) in acetonitrile (2

mL) at -20 °C under nitrogen atmosphere for 4 h. The residue was purified by flash column chromatography on silica gel (50% EtOAc/hexanes) to afford **3k** (175 mg, 98%) as an off white solid. HPLC purity: >99:1 *er.*  $[\alpha]^{20} = -24$  ( $c = 0.5$ , CHCl<sub>3</sub>). mp 140-144 °C. <sup>1</sup>H NMR (400 MHz, CDCl<sub>3</sub>)  $\delta$  7.56 – 7.47 (m, 3H), 7.38 – 7.32 (m, 2H), 7.30 – 7.27 (m, 1H), 7.05 – 7.01 (m, 1H), 6.82 – 6.78 (m, 1H), 5.23 (d,  $J = 3.5$  Hz, 1H), 4.60 (d,  $J = 3.5$  Hz, 1H), 4.51 (dd,  $J = 11.2, 9.4$  Hz, 1H), 4.16 (dd,  $J = 11.2, 3.6$  Hz, 1H), 3.99 (s, 3H), 3.00 (dd,  $J = 9.3, 3.7$  Hz, 1H). <sup>13</sup>C NMR (100 MHz, CDCl<sub>3</sub>)  $\delta$  166.1, 164.9, 160.1, 156.8, 156.7, 139.9, 133.7, 128.9, 127.7, 126.9, 109.9, 107.4, 106.2, 102.8, 91.7, 67.7, 57.0, 56.6. IR (thin film):  $\nu_{\max}/\text{cm}^{-1}$  3430, 3061, 2937, 2883, 1715, 1623, 1604, 1473, 1386, 1343, 1277, 1093, 1074, 971, 902, 851, 792, 737, 698. HRMS (ESI):  $m/z$  calculated for [M+H]<sup>+</sup> C<sub>20</sub>H<sub>17</sub>O<sub>5</sub>: 337.1076, found 337.1060.

**(R)-3-([1,1'-Biphenyl]-4-yl)-3-(hydroxymethyl)-2-methylene-2,3-dihydro-4H-furo[3,2-c]chromen-4-one (3l)**

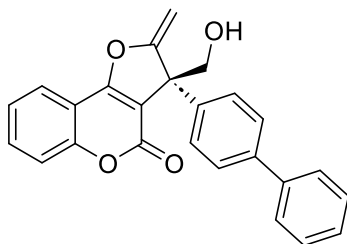

By following the general procedure, the reaction was performed with 4-hydroxycoumarin **1a** (100 mg, 0.616 mmol, 1.0 equiv) and biphenyl substituted cyclic carbonate **2c** (162.99 mg, 0.616 mmol, 1.0 equiv) using CuI (1.17 mg, 1 mol %), **L2** (3.28 mg, 2 mol %) and DABCO (10.37 mg, 15 mol%) in acetonitrile (2 mL) at -20 °C under nitrogen atmosphere for 4 h. The residue was purified by flash column chromatography on silica gel (50% EtOAc/hexanes) to afford **3l** (231 mg, 98%) as an off white solid. HPLC purity: 98:2 *er.*  $[\alpha]^{20} = -22.6$  ( $c = 0.4$ , CHCl<sub>3</sub>). mp 119-120 °C. <sup>1</sup>H NMR (400 MHz, CDCl<sub>3</sub>)  $\delta$  7.81 (dd,  $J = 7.9, 1.5$  Hz, 1H), 7.65 (ddd,  $J = 8.8, 7.4, 1.6$  Hz, 1H), 7.61 – 7.54 (m, 6H), 7.47 – 7.38 (m, 4H), 7.37 – 7.31 (m, 1H), 5.27 (d,  $J = 3.7$  Hz, 1H), 4.70 (d,  $J = 3.7$  Hz, 1H), 4.57 (td,  $J = 11.2, 9.2$  Hz, 1H), 4.22 (dd,  $J = 11.2, 3.8$  Hz, 1H), 2.90 (dd,  $J = 9.1, 3.8$  Hz, 1H). <sup>13</sup>C NMR (100 MHz, CDCl<sub>3</sub>)  $\delta$  165.6, 164.6, 160.1, 155.2, 140.7, 140.5, 138.5, 133.3, 128.8, 127.7, 127.4, 127.2, 127.1, 124.6, 123.0, 111.5, 107.7, 106.9, 91.8, 67.5, 58.0. IR (thin film):  $\nu_{\max}/\text{cm}^{-1}$  3464, 3344, 3230, 3034, 2935, 2867, 1687, 1635, 1492, 1399, 1325, 1278, 1208, 1147, 1061, 952, 901, 843, 755, 695, 647. HRMS (ESI):  $m/z$  calculated for [M+H]<sup>+</sup> C<sub>25</sub>H<sub>19</sub>O<sub>4</sub>: 383.1283, found 383.1301.

**(R)-3-(hydroxymethyl)-3-(2-methoxyphenyl)-2-methylene-2,3-dihydro-4H-furo[3,2-c]chromen-4-one (3m)**

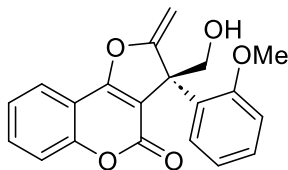

By following the general procedure, the reaction was performed with 4-hydroxycoumarin **1a** (100 mg, 0.616 mmol, 1.0 equiv) and 2-methoxy substituted cyclic carbonate **2d** (134.58 mg, 0.616 mmol, 1.0 equiv) using CuI (1.17 mg, 1 mol %), **L2** (3.28 mg, 2 mol %) and DABCO (10.37 mg, 15 mol%) in acetonitrile (2 mL) at -20 °C under nitrogen atmosphere for 4 h. The residue was purified by flash column chromatography on silica gel (50% EtOAc/hexanes) to afford **3m** (201 mg, 97%) as an off white solid. HPLC purity: >99:1 *er.*  $[\alpha]^{20} = -25.6$  ( $c = 0.5$ , CHCl<sub>3</sub>). mp 134-136 °C. <sup>1</sup>H NMR (400 MHz, CDCl<sub>3</sub>)  $\delta$  7.83 (dd,  $J = 7.8, 1.5$  Hz, 1H), 7.66 – 7.55 (m, 2H), 7.44 – 7.35 (m, 2H), 7.31 – 7.27 (m, 1H), 7.01 (td,  $J = 7.6, 1.1$  Hz, 1H), 6.86 (dd,  $J = 8.2, 0.8$  Hz, 1H), 4.96 (d,  $J = 3.4$  Hz, 1H), 4.54 (dd,  $J = 10.8, 8.5$  Hz, 1H), 4.40 (d,  $J = 3.4$  Hz, 1H), 4.18 (dd,  $J = 10.8, 4.1$  Hz, 1H), 3.60 (s, 3H), 3.01 (dd,  $J = 8.5, 4.0$  Hz, 1H). <sup>13</sup>C NMR (100 MHz, CDCl<sub>3</sub>)  $\delta$  166.8, 164.8, 160.0, 157.9, 155.1, 132.8, 129.2, 127.9, 127.8, 124.4, 122.8, 120.9, 117.2, 112.4, 111.7, 107.5, 88.4, 68.1, 55.6, 55.1. IR (thin film):  $\nu_{\max}/\text{cm}^{-1}$  3433, 3068, 2926, 2853, 1720, 1642, 1604, 1569, 1496, 1460, 1403, 1281, 1251, 1137, 1091, 1027, 952, 908, 755, 638. HRMS (ESI):  $m/z$  calculated for [M+H]<sup>+</sup> C<sub>20</sub>H<sub>17</sub>O<sub>5</sub> 337.1076, found 337.1056.

**(R)-3-(Hydroxymethyl)-3-(3-methoxyphenyl)-2-methylene-2,3-dihydro-4H-furo[3,2-c]chromen-4-one (3n)**

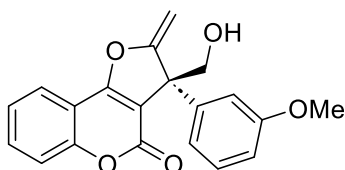

By following the general procedure, the reaction was performed with 4-hydroxycoumarin **1a** (100 mg, 0.616 mmol, 1.0 equiv) and 3-methoxy substituted cyclic carbonate **2e** (134.58 mg, 0.616 mmol, 1.0 equiv) using CuI (1.17 mg, 1 mol %), **L2** (3.28 mg, 2 mol %) and DABCO (10.37 mg, 15 mol%) in acetonitrile (2 mL) at -20 °C under nitrogen atmosphere for 4 h. The residue was purified by flash column chromatography on silica gel (50% EtOAc/hexanes) to afford **3n** (203 mg, 98%) as a off white solid. HPLC purity: 91:9 *er.*  $[\alpha]^{20} = -19.6$  ( $c = 0.7$ , CHCl<sub>3</sub>). mp 134-136 °C. <sup>1</sup>H NMR (500 MHz,



CDCl<sub>3</sub>)  $\delta$  7.79 (dd,  $J = 7.8, 1.4$  Hz, 1H), 7.65 – 7.61 (m, 1H), 7.41 (dd,  $J = 8.3, 4.9$  Hz, 1H), 7.36 (t,  $J = 7.6$  Hz, 1H), 7.28 (dd,  $J = 10.7, 5.3$  Hz, 1H), 7.11 – 7.08 (t, 1H), 7.06 (t,  $J = 2.1$  Hz, 1H), 6.82 (dd,  $J = 8.2, 2.1$  Hz, 1H), 5.24 (d,  $J = 3.7$  Hz, 1H), 4.67 (d,  $J = 3.7$  Hz, 1H), 4.52 (dd,  $J = 10.5, 6.3$  Hz, 1H), 4.16 (d,  $J = 11.2$  Hz, 1H), 3.79 (s, 3H), 2.89 (s, 1H). <sup>13</sup>C NMR (100 MHz, CDCl<sub>3</sub>)  $\delta$  165.5, 164.5, 160.0, 155.2, 141.0, 133.2, 130.0, 124.5, 123.0, 119.0, 117.2, 113.4, 112.6, 111.5, 107.6, 91.82, 67.4, 58.2, 55.3. IR (thin film):  $\nu_{\max}/\text{cm}^{-1}$  3451, 3044, 2920, 2855, 2339, 2119, 1705, 1637, 1602, 1494, 1397, 1285, 1250, 1209, 1149, 1085, 1058, 962, 903, 852, 752, 695, 630. HRMS (ESI):  $m/z$  calculated for [M+H]<sup>+</sup> C<sub>20</sub>H<sub>17</sub>O<sub>5</sub> 337.1076, found 337.1083.

**(R)-3-(Hydroxymethyl)-2-methylene-3-(p-tolyl)-2,3-dihydro-4H-furo[3,2-c]chromen-4-one (3o)**

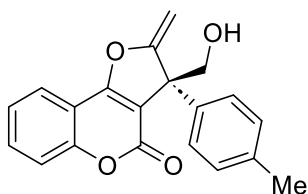

By following the general procedure, the reaction was performed with 4-hydroxycoumarin **1a** (100 mg, 0.616 mmol, 1.0 equiv) and 4-methyl substituted cyclic carbonate **2f** (124.71 mg, 0.616 mmol, 1.0 equiv) using CuI (1.17 mg, 1 mol %), **L2** (3.28 mg, 2 mol %) and DABCO (10.37 mg, 15 mol%) in acetonitrile (2 mL) at -20 °C under nitrogen atmosphere for 4 h. The residue was purified by column chromatography on silica gel (50% EtOAc/hexanes) to afford **3o** (188 mg, 95%) as a off white solid. HPLC purity: 85:15 *er*. [ $\alpha$ ]<sup>20</sup> = -18 ( $c = 1.0$ , CHCl<sub>3</sub>). mp 117-119 °C. <sup>1</sup>H NMR (400 MHz, CDCl<sub>3</sub>)  $\delta$  7.79 (dd,  $J = 7.8, 1.5$  Hz, 1H), 7.63 (ddt,  $J = 8.9, 7.4, 1.7$  Hz, 1H), 7.42 (dd,  $J = 8.3, 3.3$  Hz, 1H), 7.39 – 7.34 (m, 3H), 7.17 (d,  $J = 8.0$  Hz, 2H), 5.22 (d,  $J = 3.6$  Hz, 1H), 4.64 (d,  $J = 3.6$  Hz, 1H), 4.52 (dd,  $J = 10.7, 8.5$  Hz, 1H), 4.16 (d,  $J = 11.0$  Hz, 1H), 2.88 (d,  $J = 4.8$  Hz, 1H), 2.32 (s, 3H). <sup>13</sup>C NMR (100 MHz, CDCl<sub>3</sub>)  $\delta$  165.9, 164.4, 160.0, 155.2, 137.5, 136.5, 133.2, 129.6, 126.6, 124.5, 122.9, 117.2, 111.5, 107.9, 91.5, 67.4, 57.9, 21.0. IR (thin film):  $\nu_{\max}/\text{cm}^{-1}$  3471, 3074, 2964, 2923, 1693, 1636, 1566, 1496, 1399, 1147, 1066, 985, 902, 833, 750, 661, 630. HRMS (ESI):  $m/z$  calculated for [M+H]<sup>+</sup> C<sub>20</sub>H<sub>17</sub>O<sub>4</sub> 321.1127, found 321.1143.

**(R)-3-(4-Chlorophenyl)-3-(hydroxymethyl)-2-methylene-2,3-dihydro-4H-furo[3,2-c]chromen-4-one (3p)**

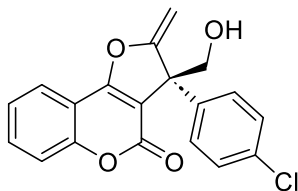

By following the general procedure, the reaction was performed with 4-hydroxycoumarin **1a** (100 mg, 0.616 mmol, 1.0 equiv) and 4-chloro substituted cyclic carbonate **2g** (137.30 mg, 0.616 mmol, 1.0 equiv) using CuI (1.17 mg, 1 mol %), **L2** (3.28 mg, 2 mol %) and DABCO (10.37 mg, 15 mol%) in acetonitrile (2 mL) at -20 °C under nitrogen atmosphere for 4 h. The residue was purified by flash column chromatography on silica gel (50% EtOAc/hexanes) to afford **3p** (208 mg, 99%) as a pale-yellow semi solid. HPLC purity: 84:16 *er.*  $[\alpha]^{20} = -18.6$  ( $c = 1.0$ , CHCl<sub>3</sub>). <sup>1</sup>H NMR (400 MHz, CDCl<sub>3</sub>)  $\delta$  7.80 (dd,  $J = 7.8, 1.5$  Hz, 1H), 7.69 – 7.63 (m, 1H), 7.47 – 7.42 (m, 3H), 7.39 (t,  $J = 7.6$  Hz, 1H), 7.35 – 7.32 (m, 2H), 5.25 (d,  $J = 3.7$  Hz, 1H), 4.63 (d,  $J = 3.7$  Hz, 1H), 4.48 (dd,  $J = 11.1, 9.1$  Hz, 1H), 4.16 (dd,  $J = 11.2, 3.4$  Hz, 1H), 2.91 (dd,  $J = 9.0, 3.7$  Hz, 1H). <sup>13</sup>C NMR (125 MHz, CDCl<sub>3</sub>)  $\delta$  165.3, 164.6, 159.9, 155.2, 138.0, 133.8, 133.4, 129.0, 128.4, 124.6, 123.0, 117.3, 111.3, 107.5, 92.0, 67.4, 57.7. IR (thin film):  $\nu_{\max}/\text{cm}^{-1}$  3428, 3016, 2929, 2879, 1707, 1679, 1639, 1568, 1495, 1403, 1328, 1212, 1148, 1094, 982, 906, 834, 755, 636. HRMS (ESI):  $m/z$  calculated for [M+H]<sup>+</sup> C<sub>19</sub>H<sub>14</sub>O<sub>4</sub>Cl 341.0581, found 341.0592.

**(R)-3-(4-Bromophenyl)-3-(hydroxymethyl)-2-methylene-2,3-dihydro-4H-furo[3,2-c]chromen-4-one (3q)**

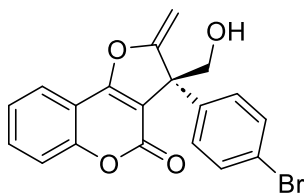

By following the general procedure, the reaction was performed with 4-hydroxycoumarin **1a** (100 mg, 0.616 mmol, 1.0 equiv) and 4-bromo substituted cyclic carbonate **2h** (164.72 mg, 0.616 mmol, 1.0 equiv) using CuI (1.17 mg, 1 mol %), **L2** (3.28 mg, 2 mol %) and DABCO (10.37 mg, 15 mol%) in acetonitrile (2 mL) at -20 °C under nitrogen atmosphere for 4 h. The residue was purified by flash column chromatography on silica gel (50% EtOAc/hexanes) to afford **3q** (235 mg, 99%) as a pale-yellow semi solid. HPLC purity: 87:13 *er.*  $[\alpha]^{20} = -17.5$  ( $c = 1.0$ , CHCl<sub>3</sub>). <sup>1</sup>H NMR (400 MHz, CDCl<sub>3</sub>)  $\delta$  7.80 (dd,  $J = 7.8, 1.5$  Hz, 1H), 7.65 (tt,  $J = 7.4, 1.6$  Hz, 1H), 7.51 – 7.47 (m, 2H), 7.45 – 7.36 (m,

4H), 5.25 (d,  $J = 3.8$  Hz, 1H), 4.63 (d,  $J = 3.8$  Hz, 1H), 4.47 (dd,  $J = 11.1, 9.1$  Hz, 1H), 4.15 (dd,  $J = 11.2, 3.4$  Hz, 1H), 2.95 (dd,  $J = 8.9, 4.1$  Hz, 1H).  $^{13}\text{C}$  NMR (125 MHz,  $\text{CDCl}_3$ )  $\delta$  165.3, 164.7, 160.0, 155.2, 138.6, 133.4, 132.0, 128.7, 124.6, 123.0, 122.0, 117.3, 111.3, 107.4, 92.1, 67.3, 57.7. IR (thin film):  $\nu_{\text{max}}/\text{cm}^{-1}$  3428, 3015, 2928, 2880, 1706, 1679, 1638, 1567, 1493, 1400, 1328, 1281, 1212, 1148, 1069, 982, 903, 749, 660, 634. HRMS (ESI):  $m/z$  calculated for  $[\text{M}+\text{H}]^+$   $\text{C}_{19}\text{H}_{14}\text{O}_4\text{Br}$  385.0075, found 385.0087.

**(R)-3-(3-Chlorophenyl)-3-(hydroxymethyl)-2-methylene-2,3-dihydro-4H-furo[3,2-c]chromen-4-one (3r)**

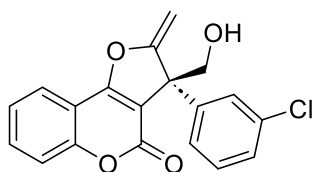

By following the general procedure, the reaction was performed with 4-hydroxycoumarin **1a** (100 mg, 0.616 mmol, 1.0 equiv) and 3-chloro substituted cyclic carbonate **2i** (137.30 mg, 0.616 mmol, 1.0 equiv) using CuI (1.17 mg, 1 mol %), **L2** (3.28 mg, 2 mol %) and DABCO (10.37 mg, 15 mol%) in acetonitrile (2 mL) at  $-20$  °C under nitrogen atmosphere for 4 h. The residue was purified by flash column chromatography on silica gel (50% EtOAc/hexanes) to afford **3r** (208 mg, 99%) as a pale-yellow semi solid. HPLC purity: 85:15 *er.*  $[\alpha]^{20} = -17.6$  ( $c = 1.0$ ,  $\text{CHCl}_3$ ).  $^1\text{H}$  NMR (400 MHz,  $\text{CDCl}_3$ )  $\delta$  7.81 (dd,  $J = 7.9, 1.5$  Hz, 1H), 7.66 (ddd,  $J = 8.8, 7.4, 1.6$  Hz, 1H), 7.47 – 7.38 (m, 4H), 7.30 (m,  $J = 8.0, 4.9, 4.5$  Hz, 2H), 5.26 (d,  $J = 3.8$  Hz, 1H), 4.65 (d,  $J = 3.8$  Hz, 1H), 4.48 (dd,  $J = 11.2, 9.2$  Hz, 1H), 4.17 (dd,  $J = 11.3, 3.8$  Hz, 1H), 2.89 (dd,  $J = 9.2, 3.8$  Hz, 1H).  $^{13}\text{C}$  NMR (100 MHz,  $\text{CDCl}_3$ )  $\delta$  165.1, 164.8, 160.0, 155.2, 141.6, 134.8, 133.5, 130.1, 128.0, 127.9, 125.1, 124.6, 123.0, 117.3, 111.3, 107.3, 92.3, 67.3, 57.8. IR (thin film):  $\nu_{\text{max}}/\text{cm}^{-1}$  3407, 2925, 2857, 2352, 1711, 1681, 1639, 1569, 1498, 1401, 1208, 1149, 1089, 962, 907, 857, 730, 643. HRMS (ESI):  $m/z$  calculated for  $[\text{M}+\text{H}]^+$   $\text{C}_{19}\text{H}_{14}\text{O}_4\text{Cl}$  341.0581, found 341.0593.

**(R)-3-(4-Fluorophenyl)-3-(hydroxymethyl)-2-methylene-2,3-dihydro-4H-furo[3,2-c]chromen-4-one (3s)**

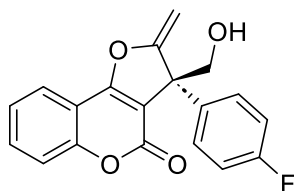

By following the general procedure, the reaction was performed with 4-hydroxycoumarin **1a** (100 mg, 0.616 mmol, 1.0 equiv) and 4-fluoro substituted cyclic carbonate **2j** (127.15 mg, 0.616 mmol, 1.0 equiv) using CuI (1.17 mg, 1 mol %), **L2** (3.28 mg, 2 mol %) and DABCO (10.37 mg, 15 mol%) in acetonitrile (2 mL) at -20 °C under nitrogen atmosphere for 4 h. The residue was purified by flash column chromatography on silica gel (50% EtOAc/hexanes) to afford **3s** (180 mg, 90%) as a pale-yellow semi solid. HPLC purity: 84:16 *er.*  $[\alpha]^{20} = -18.6$  ( $c = 1.0$ , CHCl<sub>3</sub>). <sup>1</sup>H NMR (400 MHz, CDCl<sub>3</sub>)  $\delta$  7.80 (dd,  $J = 7.8, 1.1$  Hz, 1H), 7.68 – 7.62 (m, 1H), 7.51 – 7.42 (m, 3H), 7.38 (t,  $J = 7.6$  Hz, 1H), 7.05 (t,  $J = 8.6$  Hz, 1H), 5.25 (d,  $J = 3.7$  Hz, 1H), 4.63 (d,  $J = 3.7$  Hz, 1H), 4.48 (dd,  $J = 11.0, 9.3$  Hz, 1H), 4.15 (dd,  $J = 11.3, 3.4$  Hz, 1H), 2.86 (dd,  $J = 8.9, 3.6$  Hz, 1H). <sup>13</sup>C NMR (100 MHz, CDCl<sub>3</sub>)  $\delta$  165.6, 164.5, 162.2 (d,  $J_{C-F} = 248.2$  Hz), 160.0, 155.2, 135.3, 135.3, 133.4, 128.7 (d,  $J_{C-F} = 8.0$  Hz), 124.6, 123.0, 117.3, 115.8 (d,  $J_{C-F} = 21.5$  Hz), 111.4, 107.6, 91.9, 67.5, 57.6. <sup>19</sup>F NMR (376 MHz, CDCl<sub>3</sub>)  $\delta$  -114.65. IR (thin film):  $\nu_{max}/cm^{-1}$  3445, 2926, 2856, 1723, 1643, 1607, 1567, 1507, 1405, 1262, 1233, 1161, 1095, 989, 951, 910, 842, 761, 703, 662, 637. HRMS (ESI):  $m/z$  calculated for [M+H]<sup>+</sup> C<sub>19</sub>H<sub>14</sub>O<sub>4</sub>F 325.0876, found 325.0883.

**(R)-4-Methyl-N-((2-methylene-4-oxo-3-phenyl-2,3-dihydro-4H-furo[3,2-c]chromen-3-yl)methyl)benzenesulfonamide (3t)**

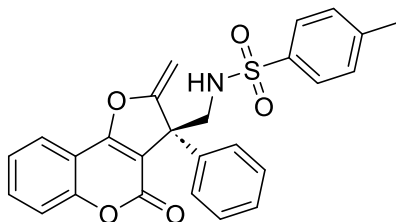

By following the general procedure, the reaction was performed with 4-hydroxycoumarin **1a** (100 mg, 0.616 mmol, 1.0 equiv) and cyclic carbamate **2k** (210.54 mg, 0.616 mmol, 1.0 equiv) using CuI (1.17 mg, 1 mol %), **L2** (3.28 mg, 2 mol %) and DABCO (10.37 mg, 15 mol%) in acetonitrile (2 mL) at -20 °C under nitrogen atmosphere for 4 h. The residue was purified by flash column chromatography on silica gel (50% EtOAc/hexanes) to afford **3t** (260 mg, 92%) as an off white solid. HPLC purity: 96:4 *er.*  $[\alpha]^{20} = -19.2$  ( $c = 1.0$ , CHCl<sub>3</sub>). mp 104-106 °C. <sup>1</sup>H NMR (400 MHz, CDCl<sub>3</sub>)  $\delta$  7.75 (dd,  $J = 7.8, 1.3$  Hz, 1H), 7.68 – 7.62 (m, 3H), 7.41 – 7.28 (m, 7H), 7.19 (d,  $J = 8.1$  Hz, 2H), 5.29 (dd,  $J = 7.9, 4.8$  Hz, 1H), 5.23 (d,  $J = 3.9$  Hz, 1H), 4.64 (d,  $J = 3.9$  Hz, 1H), 4.12 (dd,  $J = 12.7, 8.0$  Hz, 1H), 3.55 (dd,  $J = 12.7, 4.8$  Hz, 1H), 2.34 (s, 3H). <sup>13</sup>C NMR (100 MHz, CDCl<sub>3</sub>)  $\delta$  165.2, 164.4, 159.1, 155.3, 143.4, 139.0, 136., 133.4, 129.7, 129.0, 128.0, 127.0, 126.6, 124.5, 123.0, 117.2, 111.2,

106.7, 92.7, 56.0, 49.2, 21.5. IR (thin film):  $\nu_{\max}/\text{cm}^{-1}$  3898, 3820, 3727, 3643, 2951, 2857, 2367, 1713, 1683, 1635, 1497, 1443, 1400, 1325, 1154, 1086, 965, 905, 818, 755, 697, 659. HRMS (ESI):  $m/z$  calculated for  $[\text{M}+\text{H}]^+$   $\text{C}_{26}\text{H}_{22}\text{NO}_5\text{S}$  460.1219, found 460.1227.

**(R)-3-(Hydroxymethyl)-2-methylene-3-phenyl-2,3-dihydro-4H-thiochromeno[4,3-*b*]furan-4-one (3u)**

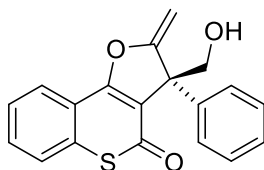

By following the general procedure, the reaction was performed with 4-hydroxy-1-thiocoumarin **1i** (100 mg, 0.561 mmol, 1.0 equiv) and cyclic carbonate **2a** (188.18 mg, 0.561 mmol, 1.0 equiv) using CuI (1.06 mg, 1 mol %), **L2** (2.99 mg, 2 mol %) and DABCO (9.44 mg, 15 mol%) in acetonitrile (2 mL) at  $-20\text{ }^\circ\text{C}$  under nitrogen atmosphere for 4 h. The residue was purified by flash column chromatography on silica gel (50% EtOAc/hexanes) to afford **3u** (172 mg, 95%) as an off white solid. HPLC purity: 64:36 *er.* mp 119-121  $^\circ\text{C}$ .  $^1\text{H}$  NMR (400 MHz,  $\text{CDCl}_3$ )  $\delta$  8.12 (dd,  $J = 8.0, 0.8$  Hz, 1H), 7.63 – 7.55 (m, 2H), 7.50 (ddd,  $J = 8.3, 6.9, 1.6$  Hz, 1H), 7.44 – 7.40 (m, 2H), 7.38 – 7.32 (m, 2H), 7.29 – 7.27 (m, 1H), 5.12 (d,  $J = 3.6$  Hz, 1H), 4.59 – 4.51 (m, 2H), 4.19 (dd,  $J = 11.3, 3.3$  Hz, 1H), 3.20 (dd,  $J = 9.1, 3.5$  Hz, 1H).  $^{13}\text{C}$  NMR (100 MHz,  $\text{CDCl}_3$ )  $\delta$  181.4, 165.0, 164.8, 140.0, 139.8, 131.3, 128.9, 127.6, 126.7, 126.3, 125.6, 119.2, 117.7, 90.2, 67.7, 59.7. IR (thin film):  $\nu_{\max}/\text{cm}^{-1}$  3412, 3061, 3022, 2926, 2880, 1811, 1610, 1548, 1480, 1376, 1269, 1151, 1117, 1067, 887, 846, 739, 699, 667. HRMS (ESI):  $m/z$  calculated for  $[\text{M}+\text{H}]^+$   $\text{C}_{19}\text{H}_{15}\text{O}_3\text{S}$  323.0742, found 323.0757.

**(R)-3-(Hydroxymethyl)-2-methylene-3-(naphthalen-2-yl)-2,3-dihydro-4H-thiochromeno[4,3-*b*]furan-4-one (3v)**

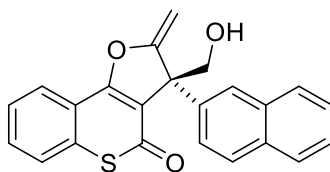

By following the general procedure, the reaction was performed with 4-hydroxy-1-thiocoumarin **1i** (100 mg, 0.561 mmol, 1.0 equiv) and naphthyl substituted cyclic carbonate **2b** (133.68 mg, 0.561 mmol, 1.0 equiv) using CuI (1.06 mg, 1 mol %), **L2** (2.99 mg, 2 mol %) and DABCO (9.44 mg, 15 mol%) in acetonitrile (2 mL) at  $-20\text{ }^\circ\text{C}$  under nitrogen atmosphere for 4 h. The residue was purified

by flash column chromatography on silica gel (50% EtOAc/hexanes) to afford **3v** (201 mg, 96%) as a off white solid. HPLC purity: 64:36 *er.* mp 104-106 °C. <sup>1</sup>H NMR (400 MHz, CDCl<sub>3</sub>) δ 8.15 (dd, *J* = 8.0, 0.8 Hz, 1H), 7.89 (d, *J* = 1.9 Hz, 1H), 7.84 – 7.78 (m, 3H), 7.65 – 7.58 (m, 2H), 7.55 – 7.44 (m, 4H), 5.14 (d, *J* = 3.6 Hz, 1H), 4.67 (dd, *J* = 11.2, 9.0 Hz, 1H), 4.56 (d, *J* = 3.6 Hz, 1H), 4.29 (dd, *J* = 11.2, 3.4 Hz, 1H), 3.29 (dd, *J* = 9.0, 3.5 Hz, 1H). <sup>13</sup>C NMR (100 MHz, CDCl<sub>3</sub>) δ 180.4, 164.0, 163.9, 138.8, 136.3, 132.3, 131.6, 130.3, 127.7, 127.3, 126.5, 125.7, 125.3, 125.2, 124.7, 124.6, 123.7, 118.1, 116.7, 89.4, 66.7, 58.7. IR (thin film):  $\nu_{\max}/\text{cm}^{-1}$  3418, 2958, 2916, 2673, 2336, 1812, 1602, 1545, 1472, 1367, 1266, 1142, 1055, 883, 813, 733, 686. HRMS (ESI): *m/z* calculated for [M+H]<sup>+</sup> C<sub>23</sub>H<sub>17</sub>O<sub>3</sub>S 373.0898, found 373.0912.

**(R)-4-Methyl-N-((2-methylene-4-oxo-3-phenyl-2,3-dihydro-4H-thiochromeno[4,3-b]furan-3-yl)methyl)benzenesulfonamide (3w)**

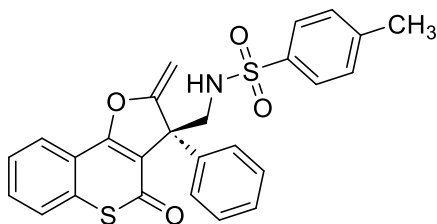

By following the general procedure, the reaction was performed with 4-hydroxy-1-thiocoumarin **1i** (100 mg, 0.561 mmol, 1.0 equiv) and cyclic carbamate **2k** (191.56 mg, 0.561 mmol, 1.0 equiv) using CuI (1.06 mg, 1 mol %), **L2** (2.99 mg, 2 mol %) and DABCO (9.44 mg, 15 mol%) in acetonitrile (2 mL) at -20 °C under nitrogen atmosphere for 4 h. The residue was purified by flash column chromatography on silica gel (50% EtOAc/hexanes) to afford **3w** (235 mg, 88%) as an off white semi solid. HPLC purity: 64:36 *er.* <sup>1</sup>H NMR (400 MHz, CDCl<sub>3</sub>) δ 8.06 (dd, *J* = 8.0, 0.9 Hz, 1H), 7.67 (d, *J* = 8.3 Hz, 2H), 7.60 (ddd, *J* = 8.4, 7.2, 1.4 Hz, 1H), 7.53 (d, *J* = 7.4 Hz, 1H), 7.51 – 7.47 (m, 1H), 7.34 – 7.27 (m, 5H), 7.20 (d, *J* = 8.0 Hz, 2H), 5.27 (dd, *J* = 7.4, 5.3 Hz, 1H), 5.13 (d, *J* = 3.8 Hz, 1H), 4.52 (d, *J* = 3.8 Hz, 1H), 4.16 (dd, *J* = 12.6, 7.6 Hz, 1H), 3.58 (dd, *J* = 12.6, 5.1 Hz, 1H), 2.36 (s, 3H). <sup>13</sup>C NMR (100 MHz, CDCl<sub>3</sub>) δ 180.1, 164.6, 164.5, 143.4, 140.1, 139.5, 136.8, 131.4, 129.7, 128.9, 127.8, 127.0, 126.7, 126.5, 126.3, 125.5, 118.9, 116.2, 116.1, 91.2, 57.5, 49.0, 21.5. IR (thin film):  $\nu_{\max}/\text{cm}^{-1}$  3870, 3566, 3256, 3026, 2924, 2855, 2363, 1619, 1549, 1480, 1443, 1376, 1331, 1159, 1092, 1070, 895, 815, 756, 707, 666. HRMS (ESI): *m/z* calculated for [M+H]<sup>+</sup> C<sub>26</sub>H<sub>22</sub>NO<sub>4</sub>S2 476.0916, found 476.0920.

## 2.3 Optimization of [3+2] Cycloaddition of $\alpha$ -Naphthol to Cyclic Carbonates<sup>a</sup>

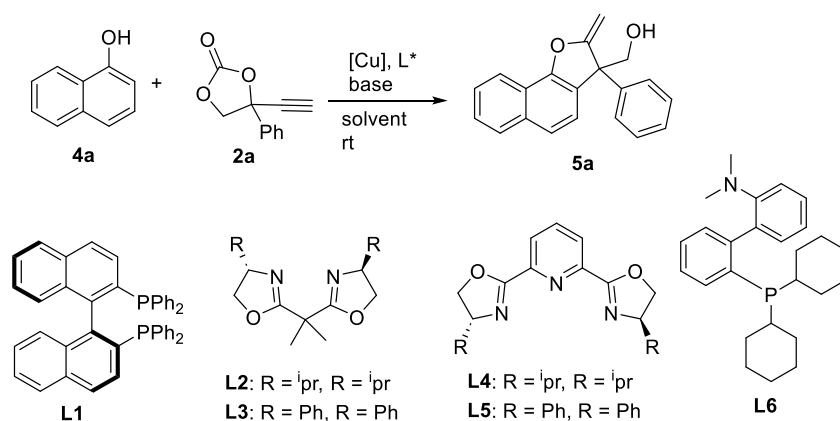

| entry           | Catalyst                          | Base                           | Solvent            | Time | Yield (%) <sup>b</sup> | <i>er</i> of <b>5a</b> |
|-----------------|-----------------------------------|--------------------------------|--------------------|------|------------------------|------------------------|
| 1               | CuI/ <b>L1</b>                    | DABCO                          | CH <sub>3</sub> CN | 16 h | 60                     | 50:50                  |
| 2               | CuI/ <b>L1</b>                    | DIPEA                          | CH <sub>3</sub> CN | 16 h | 20                     | 57:43                  |
| 3               | CuI/ <b>L1</b>                    | K <sub>2</sub> CO <sub>3</sub> | CH <sub>3</sub> CN | 16 h | 35                     | 53:47                  |
| 4               | CuI/ <b>L1</b>                    | TEA                            | CH <sub>3</sub> CN | 16 h | 25                     | 50:50                  |
| 5               | CuI/ <b>L1</b>                    | TEA                            | Toluene            | 16 h | <5                     | -                      |
| 6               | CuI/ <b>L1</b>                    | DABCO                          | EtOAc              | 18 h | 38                     | 51:49                  |
| 7               | CuI/ <b>L1</b>                    | DABCO                          | DCM                | 24 h | <5                     | -                      |
| 8               | CuI/ <b>L1</b>                    | DABCO                          | MeOH               | 24 h | 20                     | -                      |
| 9               | CuI/ <b>L1</b>                    | DABCO                          | Toluene            | 36 h | <5                     | -                      |
| 10              | Cu(OAc) <sub>2</sub> / <b>L1</b>  | DABCO                          | CH <sub>3</sub> CN | 18 h | 40                     | 53:47                  |
| 11              | Cu(acac) <sub>2</sub> / <b>L1</b> | DABCO                          | CH <sub>3</sub> CN | 18 h | 45                     | 53:47                  |
| 12              | CuI/ <b>L1</b>                    | DABCO                          | CH <sub>3</sub> CN | 16 h | 62                     | 50:50                  |
| 13              | CuI/ <b>L2</b>                    | DABCO                          | CH <sub>3</sub> CN | 16 h | 62                     | 50:50                  |
| 14              | CuI/ <b>L3</b>                    | DABCO                          | CH <sub>3</sub> CN | 16 h | 64                     | 53:47                  |
| 15              | CuI/ <b>L4</b>                    | DABCO                          | CH <sub>3</sub> CN | 16 h | 58                     | 57:43                  |
| 16              | CuI/ <b>L5</b>                    | DABCO                          | CH <sub>3</sub> CN | 16 h | 58                     | 57:43                  |
| 17              | CuI/ <b>L6</b>                    | DABCO                          | CH <sub>3</sub> CN | 16 h | 60                     | 50:50                  |
| 18              | CuI/ <b>L1</b>                    | DABCO                          | CH <sub>3</sub> CN | 16 h | 58                     | 50:50                  |
| 19 <sup>c</sup> | CuI/ <b>L1</b>                    | DABCO                          | CH <sub>3</sub> CN | 16 h | 58                     | 50:50                  |

<sup>a</sup>The reaction conditions were performed with **4a** (0.693 mmol), **2a** (0.693 mmol), base (15 mol%), catalyst (1 mol%) and ligand (2 mol%) in solvent (2 mL) at -10 °C, unless otherwise stated. Reactions were monitored by TLC, then subjected directly to silica gel column chromatography. <sup>b</sup>Yields of purified products. <sup>c</sup>The reactions were carried out at -20 °C.

## 2.4 General Procedure for Dihydronaphtho[1,2-*b*]furan Scaffolds **5**

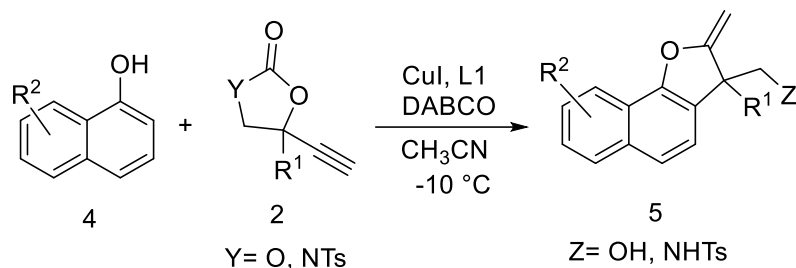

To a clean and dry round-bottom flask, added dried CuI (1 mol%) and **L1** (2 mol%) in CH<sub>3</sub>CN solvent and stirred at 70 °C for 1 h and the resultant Copper-ligand complex was cooled to -10 °C and then added **4a-4d** (0.616 mmol, 1.0 equiv) followed by DABCO (0.092 mmol, 15 mol%) and cyclic carbonate **2a-2j** (0.616 mmol, 1.0 equiv) dissolved in CH<sub>3</sub>CN was added slowly drop wise. The reaction was maintained at -10 °C for 16 h. After completion of reaction, water was added to the reaction mixture and extracted to EtOAc twice and washed the organic layer with brine solution and dried with Na<sub>2</sub>SO<sub>4</sub> and concentrated under reduced pressure and the residue was purified by column chromatography on silica gel using 20% EtOAc/hexanes as eluent to afford the pure furo[1,2-*b*]dihydronaphthol scaffolds **5**.

## 2.5 Experimental and Characterization of Dihydronaphtho[1,2-*b*]furan Scaffolds (**5a-j**)

### (2-Methylene-3-phenyl-2,3-dihydronaphtho[1,2-*b*]furan-3-yl)methanol (**5a**)

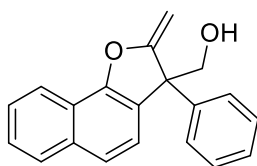

By following the general procedure, the reaction was performed with 1-Naphthol **4a** (100 mg, 0.693 mmol, 1.0equiv) and cyclic carbonate **2a** (130.52 mg, 0.693 mmol, 1.0 equiv) using CuI (1.32 mg, 1 mol %), **L1** (8.63 mg, 2 mol %) and DABCO (11.67 mg, 15 mol%) in acetonitrile (2 mL) at -10 °C under nitrogen atmosphere for 16 h. The residue was purified by column chromatography on silica gel (20% EtOAc/hexanes) to afford **5a** (120 mg, 60%) as a red semi solid. HPLC purity: 50:50 *er*. Enantioselectivity was not achieved. <sup>1</sup>H NMR (400 MHz, MeOH-*d*<sub>4</sub>) δ 8.02 (dt, *J* = 6.2, 3.5 Hz, 1H), 7.85 (dd, *J* = 7.2, 1.5 Hz, 1H), 7.52 – 7.45 (m, 3H), 7.37 – 7.34 (m, 2H), 7.28 (ddd, *J* = 7.9, 5.3, 2.4 Hz, 3H), 7.22 – 7.18 (m, 1H), 4.96 (d, *J* = 2.7 Hz, 1H), 4.33 (dd, *J* = 6.9, 4.2 Hz, 2H), 4.12 (d, *J* = 11.1 Hz, 1H). <sup>13</sup>C NMR (100 MHz, MeOH-*d*<sub>4</sub>) δ 168.2, 152.4, 142.9, 134.4, 128.2, 127.7, 126.9,



126.5, 125.9, 125.6, 125.2, 122.1, 121.6, 120.6, 119.7, 86.18, 67.6, 58.9. IR (thin film):  $\nu_{\max}/\text{cm}^{-1}$  3408, 3058, 2930, 2866, 1677, 1585, 1506, 1448, 1381, 1214, 1160, 1071, 932, 810, 753, 695. HRMS (ESI):  $m/z$  calculated for  $[\text{M}+\text{H}]^+$   $\text{C}_{20}\text{H}_{17}\text{O}_2$ : 289.1229 found 289.1237.

**(3-(4-Chlorophenyl)-2-methylene-2,3-dihydronaphtho[1,2-*b*]furan-3-yl)methanol (5b)**

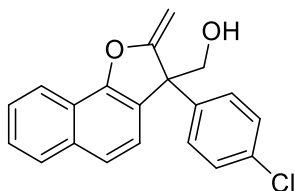

By following the general procedure, the reaction was performed with 1-Naphthol **4a** (100 mg, 0.693 mmol, 1.0 equiv) and 4-chloro substituted cyclic carbonate **2f** (154.41 mg, 0.693 mmol, 1.0 equiv) using CuI (1.32 mg, 1 mol %), **L1** (8.63 mg, 2 mol %) and DABCO (11.67 mg, 15 mol%) in acetonitrile (2 mL) at -10 °C under nitrogen atmosphere for 16 h. The residue was purified by column chromatography on silica gel (20% EtOAc/hexanes) to afford **5b** (130 mg, 58%) a red semi solid.  $^1\text{H}$  NMR (400 MHz,  $\text{CDCl}_3$ )  $\delta$  8.09 (d,  $J = 7.8$  Hz, 1H), 7.86 (d,  $J = 7.6$  Hz, 1H), 7.57 – 7.50 (m, 3H), 7.35 – 7.29 (m, 4H), 7.20 (d,  $J = 8.3$  Hz, 1H), 5.07 (d,  $J = 2.9$  Hz, 1H), 4.33 (d,  $J = 2.9$  Hz, 1H), 4.22 (ddd,  $J = 28.8, 11.3, 5.5$  Hz, 2H), 1.91 (t, 1H).  $^{13}\text{C}$  NMR (125 MHz,  $\text{CDCl}_3$ )  $\delta$  167.2, 152.7, 140.7, 134.5, 133.2, 131.6, 130.3, 128.9, 128.7, 128.1, 126.7, 126.3, 124.0, 122.6, 121.4, 121.3, 119.9, 87.9, 68.3, 58.9. IR (thin film):  $\nu_{\max}/\text{cm}^{-1}$  3457, 3060, 2927, 2856, 1814, 1672, 1993, 1384, 1217, 1163, 1089, 1017, 936, 812, 757, 675. HRMS (ESI):  $m/z$  calculated for  $[\text{M}+\text{H}]^+$   $\text{C}_{20}\text{H}_{16}\text{O}_2\text{Cl}$ : 323.0839, found 323.0847.

**(3-([1,1'-Biphenyl]-4-yl)-2-methylene-2,3-dihydronaphtho[1,2-*b*]furan-3-yl)methanol (5c)**

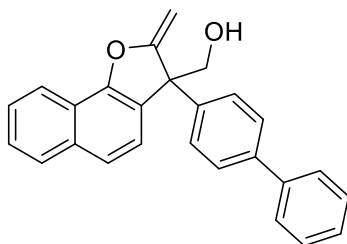

By following the general procedure, the reaction was performed with 1-Naphthol **4a** (100 mg, 0.693 mmol, 1.0 equiv) and biphenyl substituted cyclic carbonate **2c** (183.31 mg, 0.693 mmol, 1.0 equiv) using CuI (1.32 mg, 1 mol %), **L1** (8.63 mg, 2 mol %) and DABCO (11.67 mg, 15 mol%) in acetonitrile (2 mL) at -10 °C under nitrogen atmosphere for 16 h. The residue was purified by flash

column chromatography on silica gel (20% EtOAc/hexanes) to afford **5c** (137 mg, 54%) a red semi solid.  $^1\text{H}$  NMR (400 MHz, MeOH-*d*4)  $\delta$  8.06 – 8.02 (m, 1H), 7.89 – 7.85 (m, 1H), 7.59 – 7.48 (m, 7H), 7.45 – 7.36 (m, 4H), 7.35 – 7.32 (m, 1H), 7.31 – 7.26 (m, 1H), 4.98 (d,  $J = 2.7$  Hz, 1H), 4.37 (dd,  $J = 8.3, 7.0$  Hz, 2H), 4.16 (d,  $J = 11.1$  Hz, 1H).  $^{13}\text{C}$  NMR (100 MHz, MeOH-*d*4)  $\delta$  169.5, 153.8, 143.3, 141.9, 141.0, 135.8, 129.8, 129.1, 128.8, 128.3, 128.1, 127.9, 127.3, 127.0, 126.6, 123.5, 123.1, 122.0, 121.1, 87.6, 69.0, 60.1. IR (thin film):  $\nu_{\text{max}}/\text{cm}^{-1}$  3453, 3023, 2930, 1811, 1680, 1586, 1486, 1382, 1215, 1159, 1077, 931, 812, 755, 694. HRMS (ESI):  $m/z$  calculated for  $[\text{M}+\text{H}]^+$   $\text{C}_{26}\text{H}_{21}\text{O}_2$ : 365.1542, found 365.1554.

**(3-(3-Methoxyphenyl)-2-methylene-2,3-dihydronaphtho[1,2-*b*]furan-3-yl)methanol (5d)**

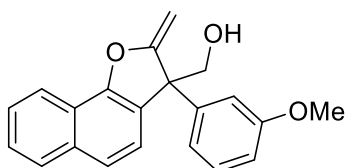

By following the general procedure, the reaction was performed with 1-Naphthol **4a** (100 mg, 0.693 mmol, 1.0 equiv) and 3-methoxy substituted cyclic carbonate **2d** (151.35 mg, 0.693 mmol, 1.0 equiv) using CuI (1.32 mg, 1 mol %), **L2** (8.63 mg, 2 mol %) and DABCO (11.67 mg, 15 mol%) in acetonitrile (2 mL) at -10 °C under nitrogen atmosphere for 16 h. The residue was purified by flash column chromatography on silica gel (20% EtOAc/hexanes) to afford **5d** (115 mg, 52%) a red semi solid.  $^1\text{H}$  NMR (400 MHz, MeOH-*d*4)  $\delta$  8.05 – 8.00 (m, 1H), 7.89 – 7.84 (m, 1H), 7.56 – 7.46 (m, 3H), 7.32 (d,  $J = 8.4$  Hz, 1H), 7.23 (t,  $J = 8.0$  Hz, 1H), 6.96 (ddd,  $J = 7.8, 1.7, 0.8$  Hz, 1H), 6.91 – 6.90 (m, 1H), 6.79 (ddd,  $J = 8.2, 2.5, 0.8$  Hz, 1H), 4.97 (d,  $J = 2.7$  Hz, 1H), 4.37 (d,  $J = 2.7$  Hz, 1H), 4.31 (d,  $J = 11.1$  Hz, 1H), 4.11 (d,  $J = 11.1$  Hz, 1H), 3.71 (s, 3H).  $^{13}\text{C}$  NMR (100 MHz, MeOH-*d*4)  $\delta$  169.3, 161.3, 153.7, 145.7, 135.8, 130.6, 129.1, 127.3, 127.0, 126.5, 123.5, 123.0, 122.0, 121.1, 120.5, 114.5, 113.0, 87.6, 69.0, 60.3, 55.6. IR (thin film):  $\nu_{\text{max}}/\text{cm}^{-1}$  3453, 2926, 2856, 1732, 1677, 1593, 1455, 1382, 1255, 1227, 1161, 1058, 977, 937, 809, 771, 696. HRMS (ESI):  $m/z$  calculated for  $[\text{M}+\text{H}]^+$   $\text{C}_{21}\text{H}_{19}\text{O}_3$  319.1334, found 319.1342.

**(2-Methylene-3-(naphthalen-2-yl)-2,3-dihydronaphtho[1,2-*b*]furan-3-yl)methanol (5e)**

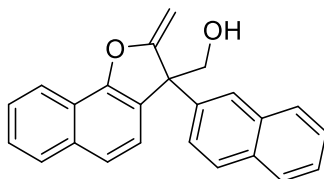

By following the general procedure, the reaction was performed with 1-Naphthol **4a** (100 mg, 0.693 mmol, 1.0 equiv) and naphthyl substituted cyclic carbonate **2b** (165.24 mg, 0.693 mmol, 1.0 equiv) using CuI (1.32 mg, 1 mol %), **L1** (8.63 mg, 2 mol %) and DABCO (8.63 mg, 0.104 mmol, 0.15 equiv) in acetonitrile (2 mL) at -10 °C under nitrogen atmosphere for 16 h. The residue was purified by flash column chromatography on silica gel (20% EtOAc/hexanes) to afford **5e** (150 mg, 64%) a red semi solid. <sup>1</sup>H NMR (400 MHz, MeOH-*d*<sub>4</sub>) δ 8.08 (d, *J* = 7.7 Hz, 1H), 7.95 – 7.73 (m, 5H), 7.48 (ddd, *J* = 24.8, 8.5, 4.1 Hz, 5H), 7.34 (ddd, *J* = 13.4, 8.5, 4.2 Hz, 2H), 5.06 – 4.98 (m, 1H), 4.48 (dd, *J* = 11.0, 4.8 Hz, 1H), 4.42 – 4.36 (m, 1H), 4.27 (dd, *J* = 11.0, 4.7 Hz, 1H). <sup>13</sup>C NMR (100 MHz, MeOH-*d*<sub>4</sub>) δ 168.2, 152.5, 140.1, 134.5, 133.3, 132.4, 127.9, 127.8, 127.0, 126.0, 125.8, 125.7, 125.6, 125.3, 125.1, 122.1, 121.8, 121.6, 120.7, 119.7, 86.5, 67.6, 59.1. IR (thin film):  $\nu_{\max}/\text{cm}^{-1}$  3454, 3057, 2952, 2889, 1811, 1676, 1636, 1588, 1513, 1444, 1382, 1271, 1216, 1159, 1063, 935, 809, 754, 683. HRMS (ESI): *m/z* calculated for [M+H]<sup>+</sup> C<sub>24</sub>H<sub>19</sub>O<sub>2</sub>: 339.1385, found 339.1391.

**(7-Methoxy-2-methylene-3-phenyl-2,3-dihydronaphtho[1,2-*b*]furan-3-yl)methanol (5f)**

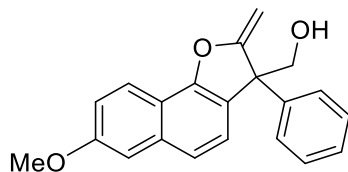

By following the general procedure, the reaction was performed with 7-methoxy-1-Naphthol **4b** (100 mg, 0.574 mmol, 1.0 equiv) and cyclic carbonate **2a** (108.1 mg, 0.574 mmol, 1.0 equiv) using CuI (1.09 mg, 1 mol %), **L1** (7.15 mg, 2 mol %) and DABCO (9.66 mg, 15 mol%) in acetonitrile (2 mL) at -10 °C under nitrogen atmosphere for 16 h. The residue was purified by flash column chromatography on silica gel (20% EtOAc/hexanes) to afford **5f** (108 mg, 59%) as a red semi solid. <sup>1</sup>H NMR (600 MHz, MeOH-*d*<sub>4</sub>) δ 7.76 (d, *J* = 9.0 Hz, 1H), 7.44 (d, *J* = 8.3 Hz, 1H), 7.37 (d, *J* = 7.6 Hz, 2H), 7.34 – 7.29 (m, 3H), 7.22 (t, *J* = 7.3 Hz, 1H), 7.16 – 7.11 (m, 2H), 4.96 (d, *J* = 2.7 Hz, 1H), 4.36 – 4.31 (m, 2H), 4.14 (d, *J* = 11.1 Hz, 1H), 3.94 (s, 3H). <sup>13</sup>C NMR (150 MHz, MeOH-*d*<sub>4</sub>) δ 168.2, 157.9, 151.7, 142.9, 129.9, 129.4, 128.2, 126.9, 126.5, 125.8, 121.4, 120.5, 119.5, 118.8, 98.6, 85.9, 67.6, 59.1, 54.5. IR (thin film):  $\nu_{\max}/\text{cm}^{-1}$  3446, 2926, 2858, 1732, 1678, 1605, 1460, 1441, 1379, 1341, 1271, 1227, 1157, 1069, 935, 837, 705, 696, 661. HRMS (ESI): *m/z* calculated for [M+H]<sup>+</sup> C<sub>21</sub>H<sub>19</sub>O<sub>3</sub> 319.1334, found 319.1357.

**(8-Methoxy-2-methylene-3-(naphthalen-2-yl)-2,3-dihydronaphtho[1,2-*b*]furan-3-yl)methanol**  
**(5g)**

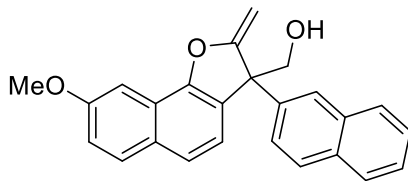

By following the general procedure, the reaction was performed with 6-methoxy-1-Naphthol **4c** (100 mg, 0.574 mmol, 1.0 equiv) and naphthyl substituted cyclic carbonate **2b** (136.86 mg, 0.574 mmol, 1.0 equiv) using CuI (1.09 mg, 1 mol %), **L1** (7.15 mg, 2 mol %) and DABCO (9.66 mg, 15 mol%) in acetonitrile (2 mL) at -10 °C under nitrogen atmosphere for 16 h. The residue was purified by flash column chromatography on silica gel (20% EtOAc/hexanes) to afford **5g** (123 mg, 58%) a red semi solid. <sup>1</sup>H NMR (400 MHz, MeOH-*d*4) δ 7.99 – 7.91 (m, 2H), 7.84 – 7.73 (m, 3H), 7.48 – 7.41 (m, 3H), 7.36 (dd, *J* = 8.7, 1.7 Hz, 1H), 7.27 – 7.24 (m, 2H), 7.18 (dd, *J* = 9.1, 2.3 Hz, 1H), 4.97 (d, *J* = 2.6 Hz, 1H), 4.44 (d, *J* = 11.1 Hz, 1H), 4.35 (d, *J* = 2.6 Hz, 1H), 4.24 (d, *J* = 11.1 Hz, 1H), 3.91 (s, 3H). <sup>13</sup>C NMR (100 MHz, MeOH-*d*4) δ 169.7, 159.6, 154.1, 141.7, 137.4, 134.7, 133.7, 129.2, 129.1, 128.4, 127.2, 127.0, 126.4, 124.5, 124.1, 123.5, 122.0, 119.7, 116.4, 107.3, 87.7, 69.0, 60.3, 55.8. IR (thin film):  $\nu_{\text{max}}/\text{cm}^{-1}$  3408, 3012, 2926, 1729, 1675, 1636, 1602, 1472, 1424, 1362, 1249, 1216, 1150, 1026, 947, 914, 818, 751, 677. HRMS (ESI): *m/z* calculated for [M+H]<sup>+</sup> C<sub>25</sub>H<sub>21</sub>O<sub>3</sub>: 369.1491, found 369.1491.

**(8-Fluoro-2-methylene-3-(naphthalen-2-yl)-2,3-dihydronaphtho[1,2-*b*]furan-3-yl)methanol**  
**(5h)**

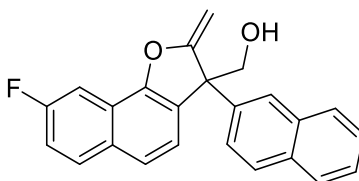

By following the general procedure, the reaction was performed with 6-fluoro-1-Naphthol **4d** (100 mg, 0.616 mmol, 1.0 equiv) and naphthyl substituted cyclic carbonate **2b** (146.91 mg, 0.616 mmol, 1.0 equiv) using CuI (1.17 mg, 1 mol %), **L1** (7.68 mg, 2 mol %) and DABCO (10.37 mg, 15 mol%) in acetonitrile (2 mL) at -10 °C under nitrogen atmosphere for 16 h. The residue was purified by flash column chromatography on silica gel (20% EtOAc/hexanes) to afford **5h** (136 mg, 62%) a red semi solid. <sup>1</sup>H NMR (400 MHz, MeOH-*d*4) δ 7.96 – 7.91 (m, 2H), 7.84 – 7.74 (m, 3H), 7.68 – 7.64 (m,

1H), 7.55 (d,  $J = 8.3$  Hz, 1H), 7.47 – 7.43 (m, 2H), 7.37 – 7.28 (m, 3H), 5.01 (d,  $J = 2.8$  Hz, 1H), 4.48 (d,  $J = 11.1$  Hz, 1H), 4.39 (d,  $J = 2.8$  Hz, 1H), 4.26 (d,  $J = 11.1$  Hz, 1H).  $^{13}\text{C}$  NMR (100 MHz, MeOH- $d_4$ )  $\delta$  169.3, 162.0 (d,  $J_{\text{C-F}} = 244.0$  Hz), 153.5 (d,  $J_{\text{C-F}} = 5.1$  Hz), 141.3, 134.7, 133.8, 132.1 (d,  $J_{\text{C-F}} = 9.0$  Hz), 129.2, 128.4, 127.9, 127.2, 126.9, 126.4, 123.2, 122.8, 121.4 (d,  $J_{\text{C-F}} = 9.6$  Hz), 117.5 (d,  $J_{\text{C-F}} = 25.5$  Hz), 105.4 (d,  $J_{\text{C-F}} = 22.3$  Hz), 88.9, 68.9, 60.6.  $^{19}\text{F}$  NMR (376 MHz, MeOD- $d_4$ )  $\delta$  -115.57. IR (thin film):  $\nu_{\text{max}}/\text{cm}^{-1}$  3445, 3057, 2930, 1731, 1676, 1639, 1522, 1454, 1368, 1266, 1190, 1159, 1092, 1060, 940, 832, 757, 666. HRMS (ESI):  $m/z$  calculated for  $[\text{M}+\text{H}]^+$   $\text{C}_{24}\text{H}_{18}\text{O}_2\text{F}$ : 357.1291, found 357.1293.

**(7-Methoxy-2-methylene-3-(naphthalen-2-yl)-2,3-dihydronaphtho[1,2-*b*]furan-3-yl)methanol**  
**(5i)**

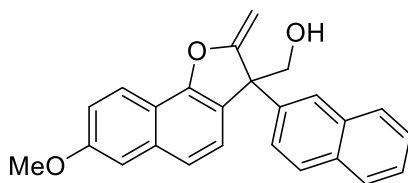

By following the general procedure, the reaction was performed with 7-methoxy-1-Naphthol **4e** (100 mg, 0.574 mmol, 1.0 equiv) and naphthyl substituted cyclic carbonate **2b** (136.86 mg, 0.574 mmol, 1.0 equiv) using CuI (1.09 mg, 1 mol %), **L1** (7.15 mg, 2 mol %) and DABCO (9.66 mg, 15 mol%) in acetonitrile (2 mL) at -10 °C under nitrogen atmosphere for 16 h. The residue was purified by flash column chromatography on silica gel (20% EtOAc/hexanes) to afford **5i** (121 mg, 57%) a red semi solid.  $^1\text{H}$  NMR (400 MHz, MeOH- $d_4$ )  $\delta$  7.93 (d,  $J = 1.7$  Hz, 1H), 7.85 – 7.75 (m, 4H), 7.48 – 7.43 (m, 3H), 7.39 – 7.35 (m, 2H), 7.18 – 7.13 (m, 2H), 4.99 (d,  $J = 2.7$  Hz, 1H), 4.46 (d,  $J = 11.1$  Hz, 1H), 4.37 (d,  $J = 2.7$  Hz, 1H), 4.27 (d,  $J = 11.1$  Hz, 1H), 3.95 (s, 3H).  $^{13}\text{C}$  NMR (100 MHz, MeOH- $d_4$ )  $\delta$  169.6, 167.2, 159.4, 153.2, 141.6, 134.7, 133.8, 131.4, 130.8, 129.2, 129.1, 128.4, 127.2, 127.03, 126.4, 122.9, 121.9, 120.9, 120.2, 100.0, 87.6, 68.9, 60.6, 55.9. IR (thin film):  $\nu_{\text{max}}/\text{cm}^{-1}$  3432, 3049, 2934, 1817, 1731, 1677, 1639, 1517, 1462, 1377, 1339, 1275, 1158, 1061, 936, 835, 760, 662. HRMS (ESI):  $m/z$  calculated for  $[\text{M}+\text{H}]^+$   $\text{C}_{25}\text{H}_{21}\text{O}_3$  369.1491, found 369.1512.

**(4-Methyl-N-((2-methylene-3-phenyl-2,3-dihydronaphtho[1,2-*b*]furan-3-yl)methyl)benzenesulfonamide (5j)**

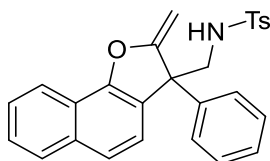

By following the general procedure, the reaction was performed with 1-Naphthol **4a** (100 mg, 0.693 mmol, 1.0 equiv) and cyclic carbamate **2j** (236.78 mg, 0.693 mmol, 1.0 equiv) using CuI (1.32 mg, 1 mol %), **L1** (8.63 mg, 2 mol %) and DABCO (11.67 mg, 15 mol%) in acetonitrile (2 mL) at -10 °C under nitrogen atmosphere for 16 h. The residue was purified by flash column chromatography on silica gel (20% EtOAc/hexanes) to afford **5j** (168 mg, 55%) as a red semi solid. <sup>1</sup>H NMR (400 MHz, MeOH-*d*4) δ 7.99 – 7.95 (m, 1H), 7.87 – 7.83 (m, 1H), 7.54 – 7.47 (m, 4H), 7.42 (d, *J* = 8.3 Hz, 1H), 7.30 (d, *J* = 4.2 Hz, 4H), 7.23 (dd, *J* = 8.3, 4.1 Hz, 1H), 7.17 (d, *J* = 8.4 Hz, 1H), 7.11 (d, *J* = 8.0 Hz, 2H), 4.99 (d, *J* = 3.1 Hz, 1H), 4.34 (d, *J* = 3.1 Hz, 1H), 4.00 (d, *J* = 13.1 Hz, 1H), 3.71 (d, *J* = 13.1 Hz, 1H), 2.32 (s, 3H). <sup>13</sup>C NMR (100 MHz, MeOH-*d*4) δ 167.3, 152.3, 142.9, 142.7, 137.9, 134.6, 129.0, 128.4, 127.8, 126.9, 126.3, 126.1, 124.0, 121.9, 121.8, 120.7, 119.6, 87.2, 57.4, 50.5, 20.1. IR (thin film):  $\nu_{\max}/\text{cm}^{-1}$  3277, 3059, 2925, 1814, 1671, 1598, 1449, 1383, 1331, 1161, 1085, 930, 810, 756, 698, 667. HRMS (ESI): *m/z* calculated for [M+H]<sup>+</sup> C<sub>27</sub>H<sub>24</sub>NO<sub>3</sub>S: 442.1477, found 442.1478.

## 2.6 Gram Scale Synthesis of Compounds 3a and 5a

### Gram Scale Synthesis of Dihydrofuro[3,2-*c*]coumarin 3a

To a clean and dry round-bottom flask, under nitrogen atmosphere added dried CuI (0.012 g, 1 mol%) and **L2** (0.032 g, 2 mol%) in CH<sub>3</sub>CN (10 mL) solvent and stirred at 70 °C for 1 h and the resultant Copper-ligand complex was cooled to -20 °C and then added **1a** (1.0 g, 6.16 mmol, 1.0 equiv) followed by DABCO (0.103 g, 0.15 equiv) and cyclic carbonate **2a** (1.16 g, 6.16 mmol, 1.0 equiv) dissolved in CH<sub>3</sub>CN (10 mL) was added slowly drop wise. The reaction was maintained and stirred at -20 °C for 8 h. After completion of reaction, the reaction mixture was concentrated under reduced pressure and the residue was purified by column chromatography on silica gel using 50% EtOAc/hexanes as eluent to afford the pure furo[3,2-*c*]coumarin scaffold **3a** (1.85 g, 98%) as pale yellow solid. HPLC purity: 98:2 *er*

## Gram Scale Synthesis of Dihydronaphtho[1,2-*b*]furan (5a)

To a clean and dry round-bottom flask, added dried CuI (0.013g, 1 mol%) and **L1** (0.086 g, 2 mol%) in CH<sub>3</sub>CN (10 mL) solvent and stirred at 70 °C for 1 h and the resultant Copper-ligand complex was cooled to -10 °C and then added **4a** (1.0 g, 6.936 mmol, 1.0 equiv) followed by DABCO (0.117g, 15 mol%) and cyclic carbonate **2a** (1.3 g, 6.936mmol, 1.0 equiv) dissolved in CH<sub>3</sub>CN(10 mL) was added slowly drop wise. The reaction was maintained at -10 °C for 24 h. After completion of reaction, water was added to the reaction mixture and extracted with EtOAc twice and washed the organic layer with brine solution and dried over Na<sub>2</sub>SO<sub>4</sub> and concentrated under reduced pressure. The residue was purified by column chromatography on silica gel using 20% EtOAc/hexanes as eluent to afford the pure furo[1,2-*b*]dihydronaphthol scaffolds **5a** (1.2 g, 60%) as a red semi solid. HPLC purity: 50:50 *er*

## 2.7. Product Derivatization

### (*R*)-(2-Methylene-4-oxo-3-phenyl-2,3-dihydro-4*H*-furo[3,2-*c*]chromen-3-yl)methyl acetate (**6**)

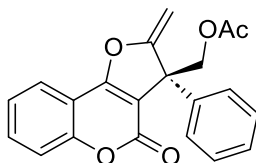

To a clean and dry round-bottom flask added compound **3a** (100 mg, 0.326 mmol, 1.0 equiv) in DCM (2 mL), Et<sub>3</sub>N (0.06 mL, 0.489 mmol, 1.5 equiv) and acetic anhydride (0.04 mL, 0.489 mmol, 1.5 equiv) were added slowly and the reaction mixture was stirred at room temperature for 8 h. After completion of the reaction, the reaction mixture was quenched with NH<sub>4</sub>Cl solution and extracted with DCM twice and dried over Na<sub>2</sub>SO<sub>4</sub> and concentrated under reduced pressure. The residue was purified by column chromatography on silica gel using 20% EtOAc/hexanes as eluent to afford **6** (91 mg, 80%) as an off white semi-solid. HPLC purity: 97.7:2.3 *er* <sup>1</sup>H NMR (400 MHz, CDCl<sub>3</sub>) δ 7.80 (dd, *J* = 7.8, 1.5 Hz, 1H), 7.62 (ddd, *J* = 8.7, 7.4, 1.6 Hz, 1H), 7.52 (dt, *J* = 8.6, 2.3 Hz, 2H), 7.37 (m, *J* = 10.5, 8.0, 5.1 Hz, 4H), 7.32 – 7.27 (m, 1H), 5.26 (d, *J* = 3.7 Hz, 1H), 4.91 (d, *J* = 0.8 Hz, 2H), 4.63 (d, *J* = 3.7 Hz, 1H), 1.98 (s, 3H). <sup>13</sup>C NMR (150 MHz, CDCl<sub>3</sub>) δ 170.6, 165.4, 163.9, 158.3, 155.5, 139.2, 133.2, 129.0, 128.13, 126.8, 124.4, 123.0, 117.3, 111.6, 106.9, 92.2, 66.1, 56.0, 29.8, 21.0. IR (thin film):  $\nu_{\max}/\text{cm}^{-1}$  3438, 3254, 2928, 2857, 1724, 1685, 1641, 1604, 1566, 1496, 1453, 1393, 1226, 1083, 1039, 963, 904, 862, 755, 694. HRMS (ESI): *m/z* calculated for [M+H]<sup>+</sup> C<sub>21</sub>H<sub>17</sub>O<sub>5</sub>: 349.1076, found 349.1067.

**(R)-3-(Hydroxymethyl)-2-methylene-3-(naphthalen-2-yl)-8-(phenylethynyl)-2,3-dihydro-4H-furo[3,2-c]chromen-4-one (7)**

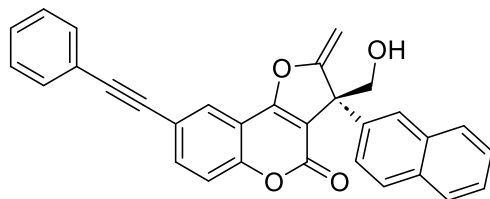

To a clean and dry sealed tube added compound **3i** (50 mg, 0.115 mmol, 1.0 equiv) in DMF (2 mL), Pd(PPh<sub>3</sub>)<sub>2</sub>Cl<sub>2</sub> (0.80 mg, 1 mol%), CuI (2.19 mg, 0.001mmol, 0.1 equiv) and Et<sub>3</sub>N(0.03 mL, 0.230 mmol, 2.0 equiv), stirred the reaction mixture at room temperature for 15 mins and then added phenyl acetylene (15.3 mg, 0.149 mmol, 1.3 equiv) and the reaction mixture was stirred at room temperature for 16 h. After completion of the reaction, the reaction mixture was filtered through celite pad and washed the bed with EtOAc. Now, collected the filtrate and washed with NH<sub>4</sub>Cl solution and dried over Na<sub>2</sub>SO<sub>4</sub> and concentrated under reduced pressure. The residue was purified by column chromatography on silica gel using 25% EtOAc/hexanes as eluent to afford **7** (41 mg, 77%) as a pale yellow semi-solid. HPLC purity: 99:1 *er*. <sup>1</sup>H NMR (400 MHz, CDCl<sub>3</sub>) δ 7.98 – 7.90 (m, 3H), 7.87 – 7.79 (m, 5H), 7.75 – 7.68 (m, 2H), 7.57 (dd, *J* = 8.7, 2.0 Hz, 1H), 7.50 – 7.46 (m, 3H), 7.32 (d, *J* = 8.9 Hz, 1H), 5.29 (d, *J* = 3.7 Hz, 1H), 4.82 – 4.56 (m, 2H), 4.29 (dd, *J* = 11.2, 4.0 Hz, 1H), 2.73 (dd, *J* = 8.9, 4.0 Hz, 1H). <sup>13</sup>C NMR (100 MHz, CDCl<sub>3</sub>) δ 165.5, 163.3, 159.2, 154.0, 136.5, 136.0, 133.3, 132.8, 132.7, 128.9, 128.6, 128.3, 127.5, 127.3, 126.5, 126.4, 126.3, 125.8, 125.5, 124.6, 118.9, 117.3, 117.3, 113.0, 108.6, 92.3, 67.1, 58.4. IR (thin film):  $\nu_{\max}/\text{cm}^{-1}$  3394, 3058, 2927, 2871, 1726, 1662, 1600, 1560, 1488, 1424, 1383, 1306, 1263, 1211, 1149, 1103, 1064, 965, 910, 859, 820, 762, 728, 663. HRMS (ESI): *m/z* calculated for [M+H]<sup>+</sup> C<sub>31</sub>H<sub>21</sub>O<sub>4</sub>: 457.1369, found 457.1380.

### 3. References

1. M. Wang, B. Li, B. Gong, H. Yao and A. Lin, *Chem. Commun.*, 2022, **58**, 2850–2853.



#### 4. $^1\text{H}$ , $^{13}\text{C}$ NMR and $^{19}\text{F}$ Spectra of Compounds

##### (*R*)-3-(Hydroxymethyl)-2-methylene-3-phenyl-2,3-dihydro-4*H*-furo[3,2-*c*]chromen-4-one (3a)

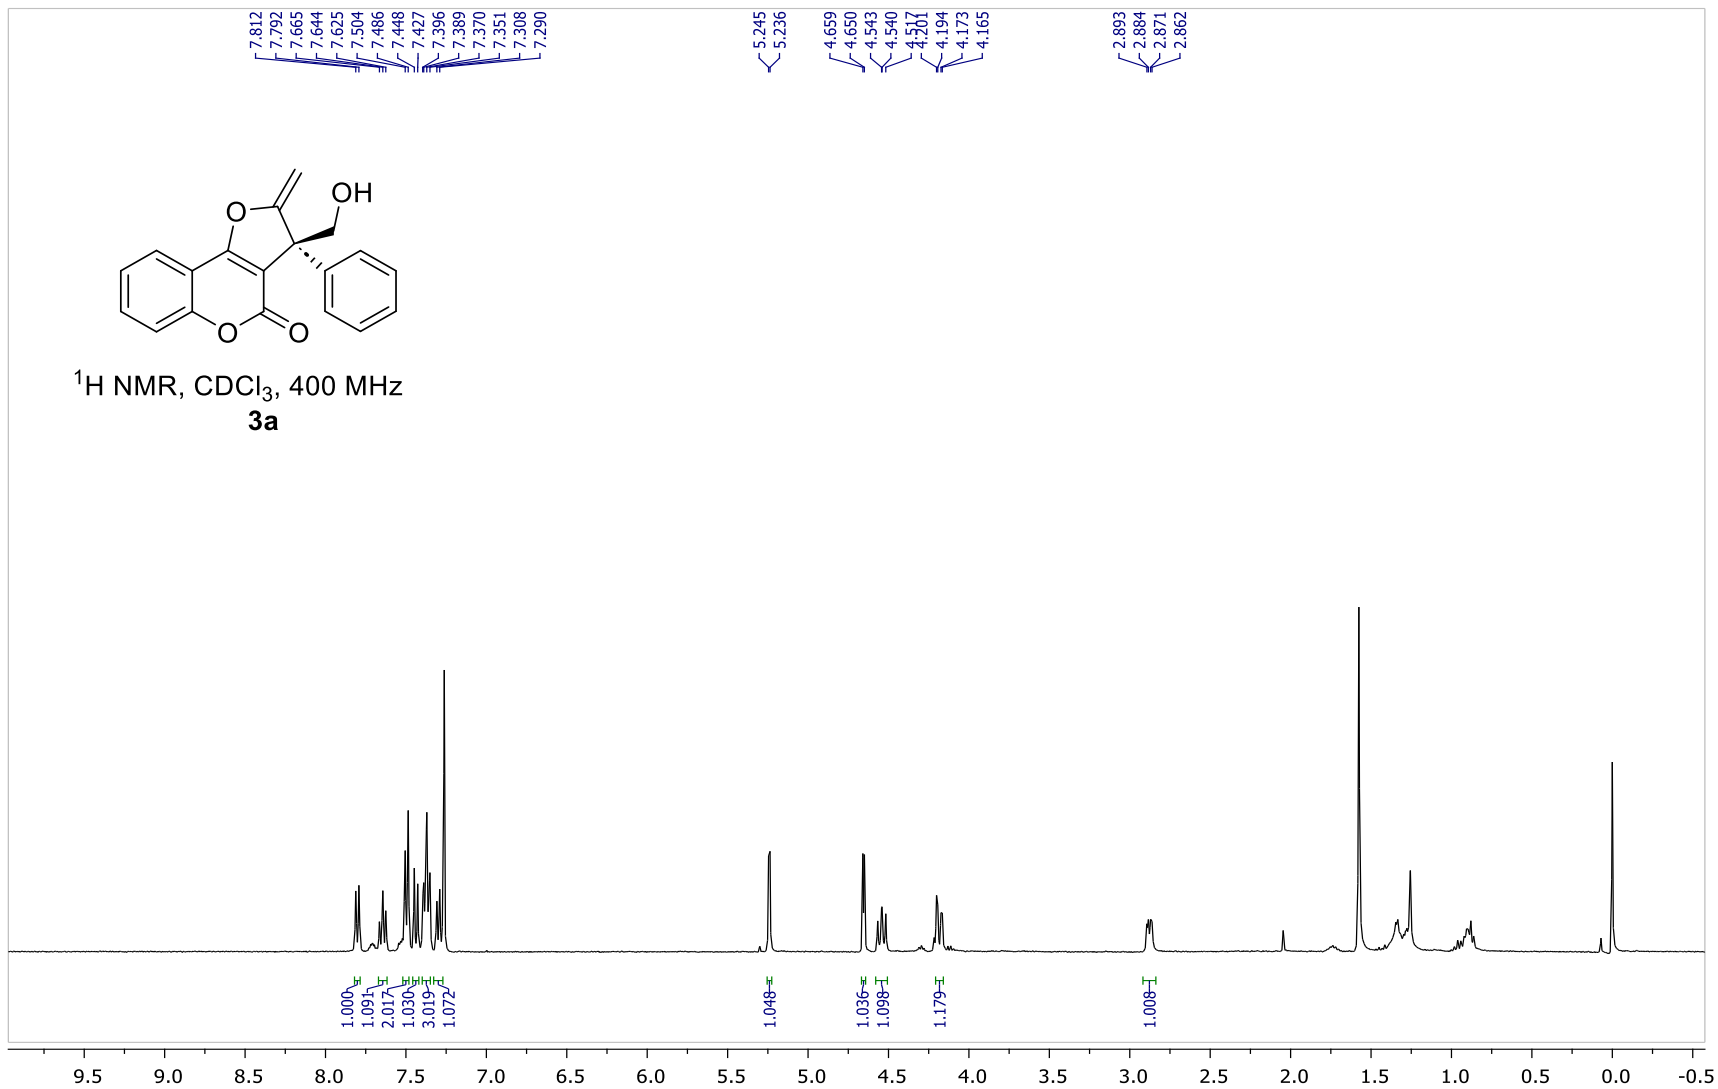

**(R)-3-(Hydroxymethyl)-2-methylene-3-phenyl-2,3-dihydro-4H-furo[3,2-c]chromen-4-one (3a)**

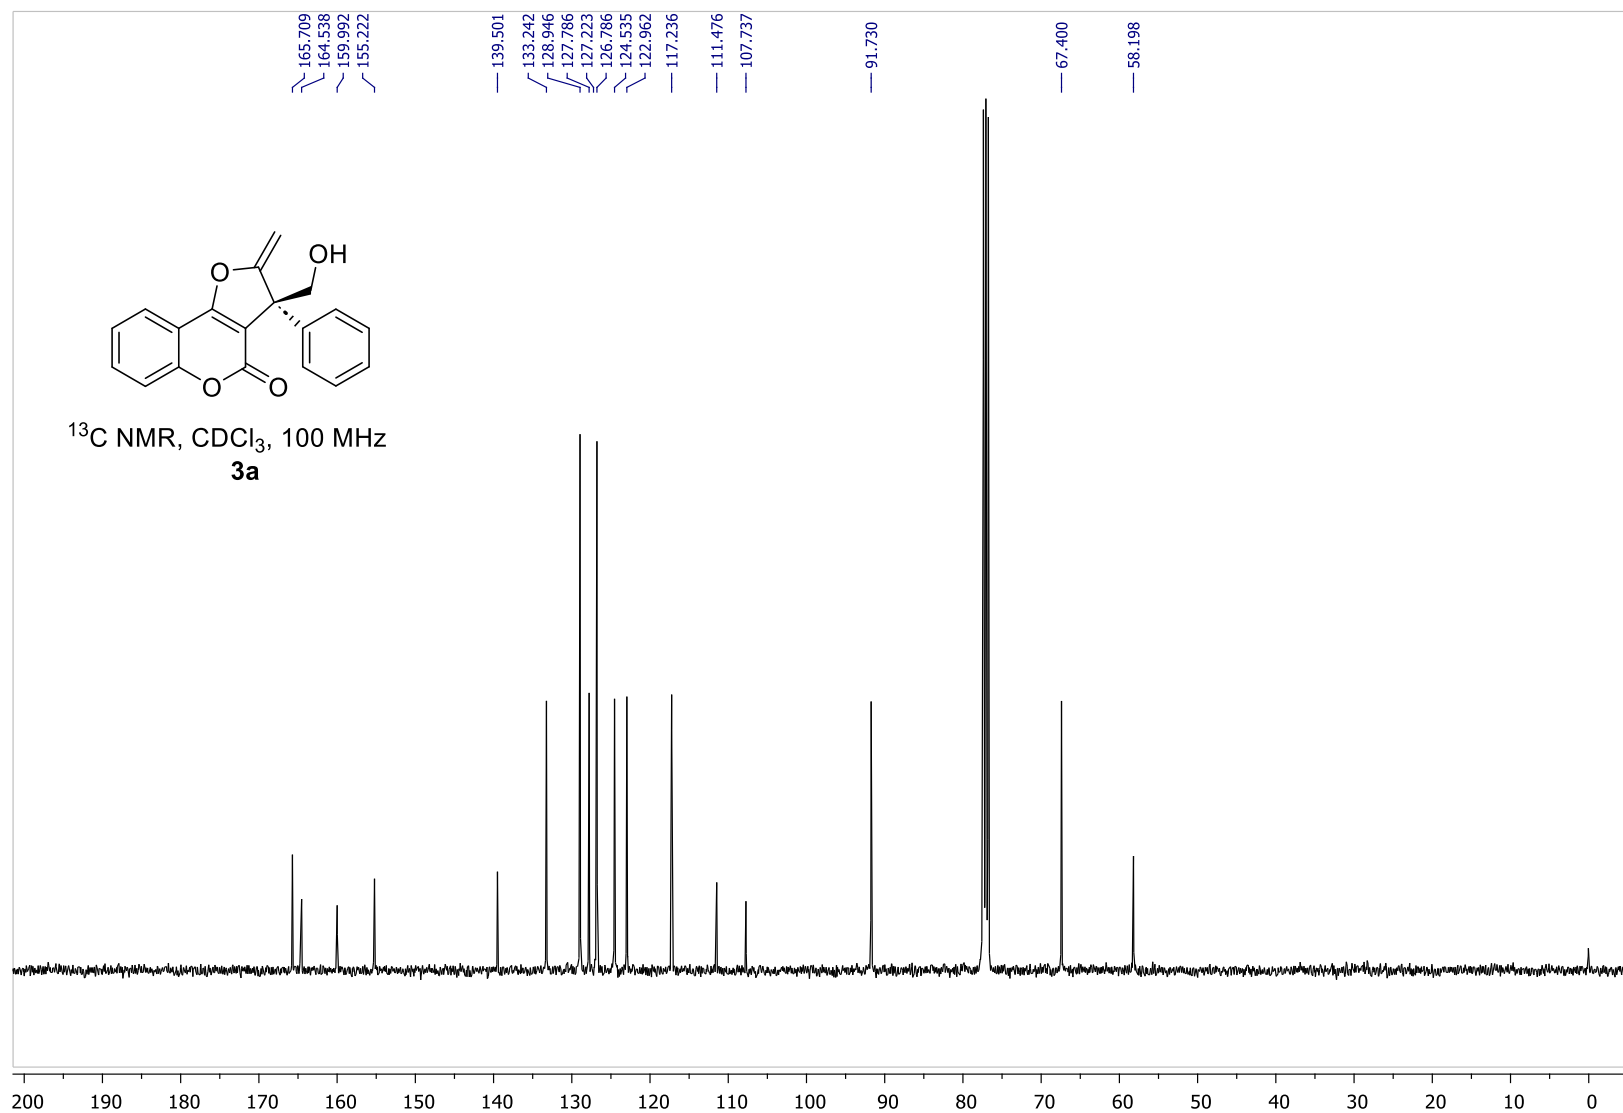

**(R)-3-(Hydroxymethyl)-8-methyl-2-methylene-3-phenyl-2,3-dihydro-4H-furo[3,2-c]chromen-4-one (3b)**

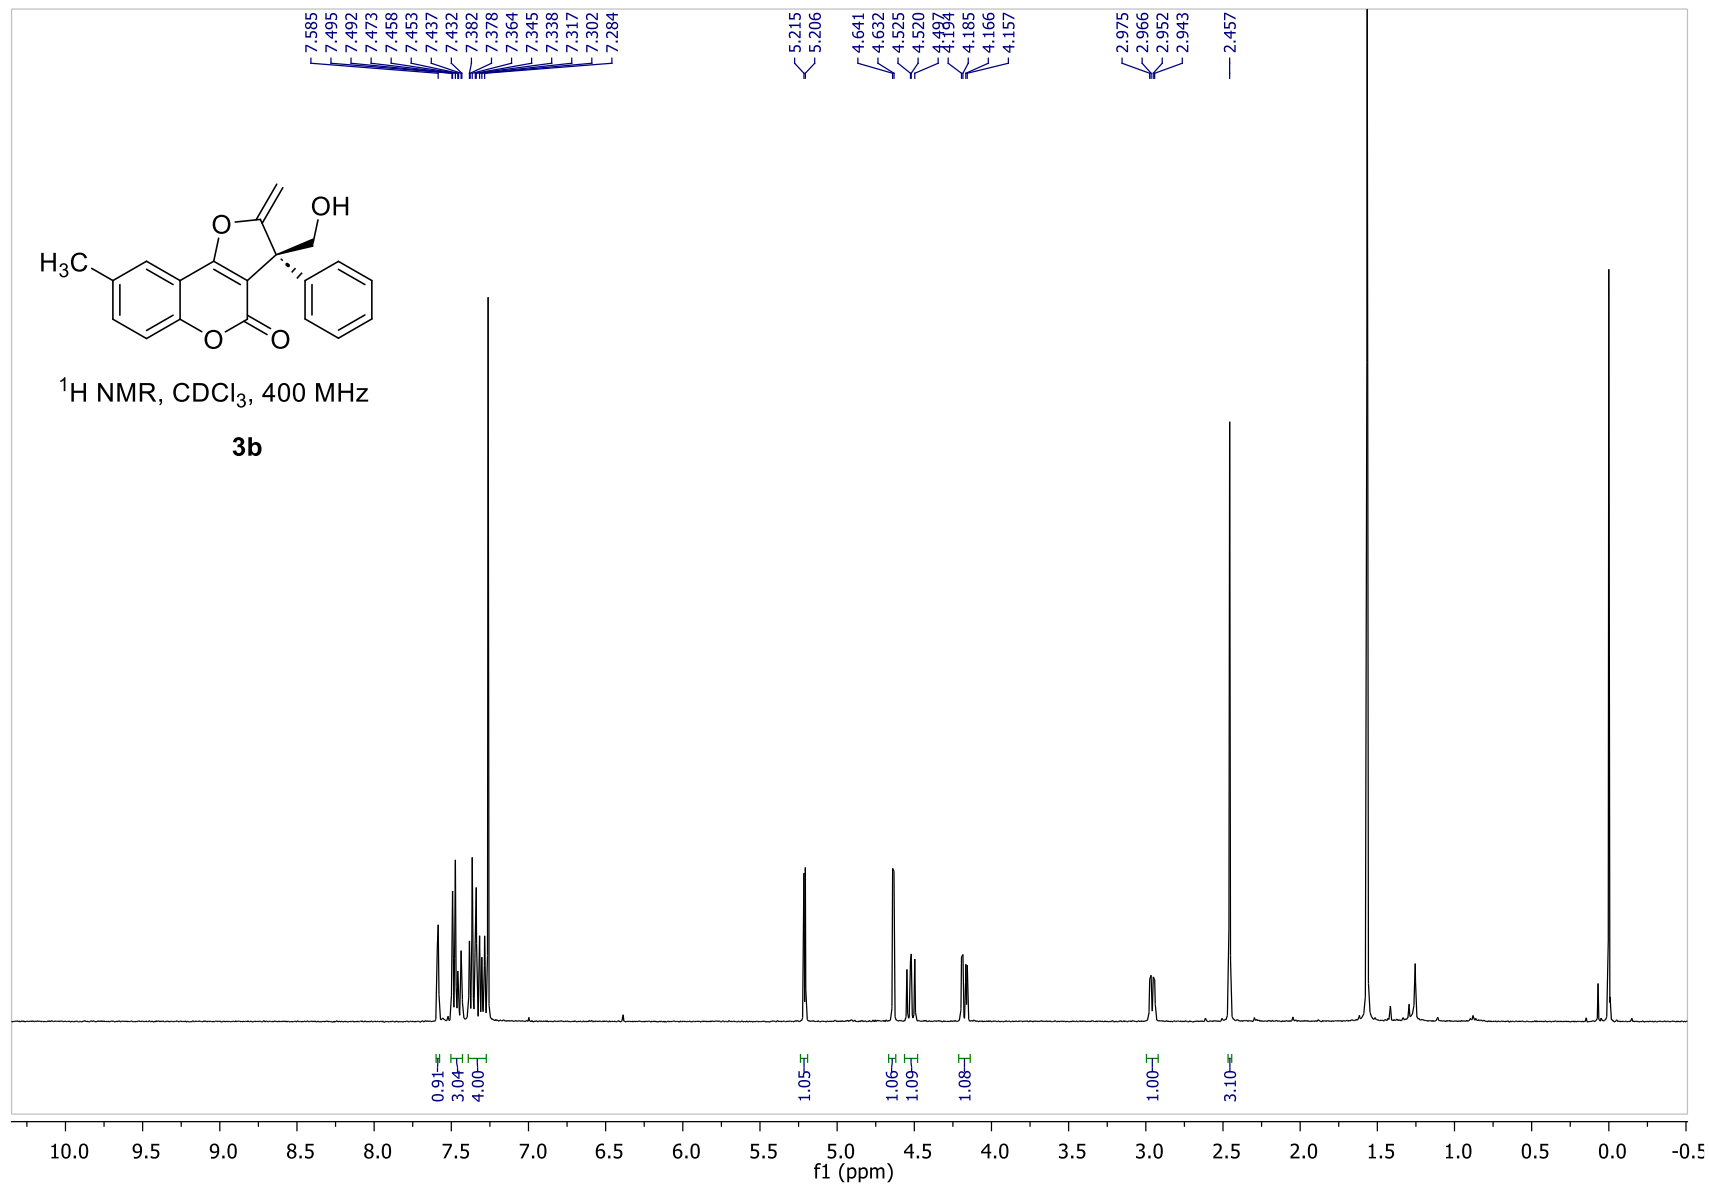

**(R)-3-(Hydroxymethyl)-8-methyl-2-methylene-3-phenyl-2,3-dihydro-4H-furo[3,2-c]chromen-4-one (3b)**

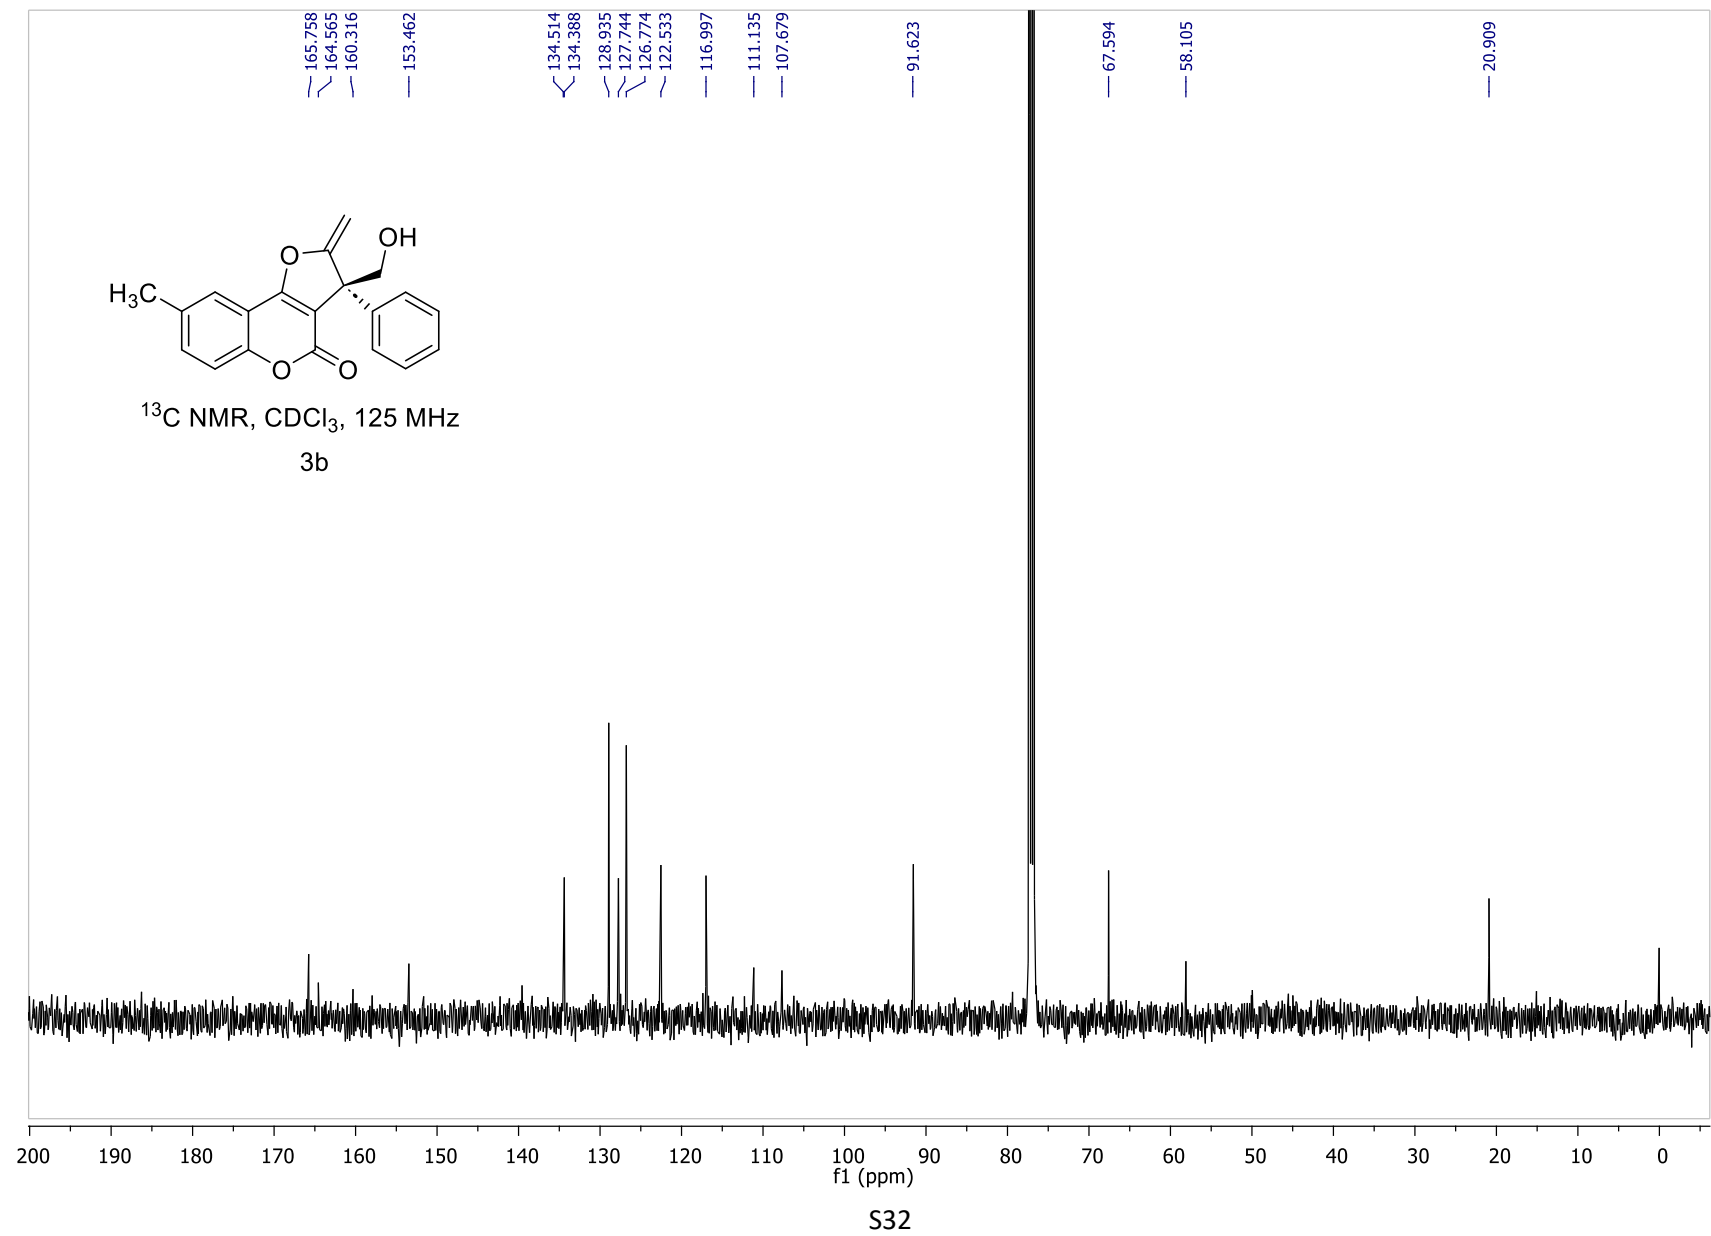

**(R)-8-Bromo-3-(hydroxymethyl)-2-methylene-3-phenyl-2,3-dihydro-4H-furo[3,2-c]chromen-4-one (3c)**

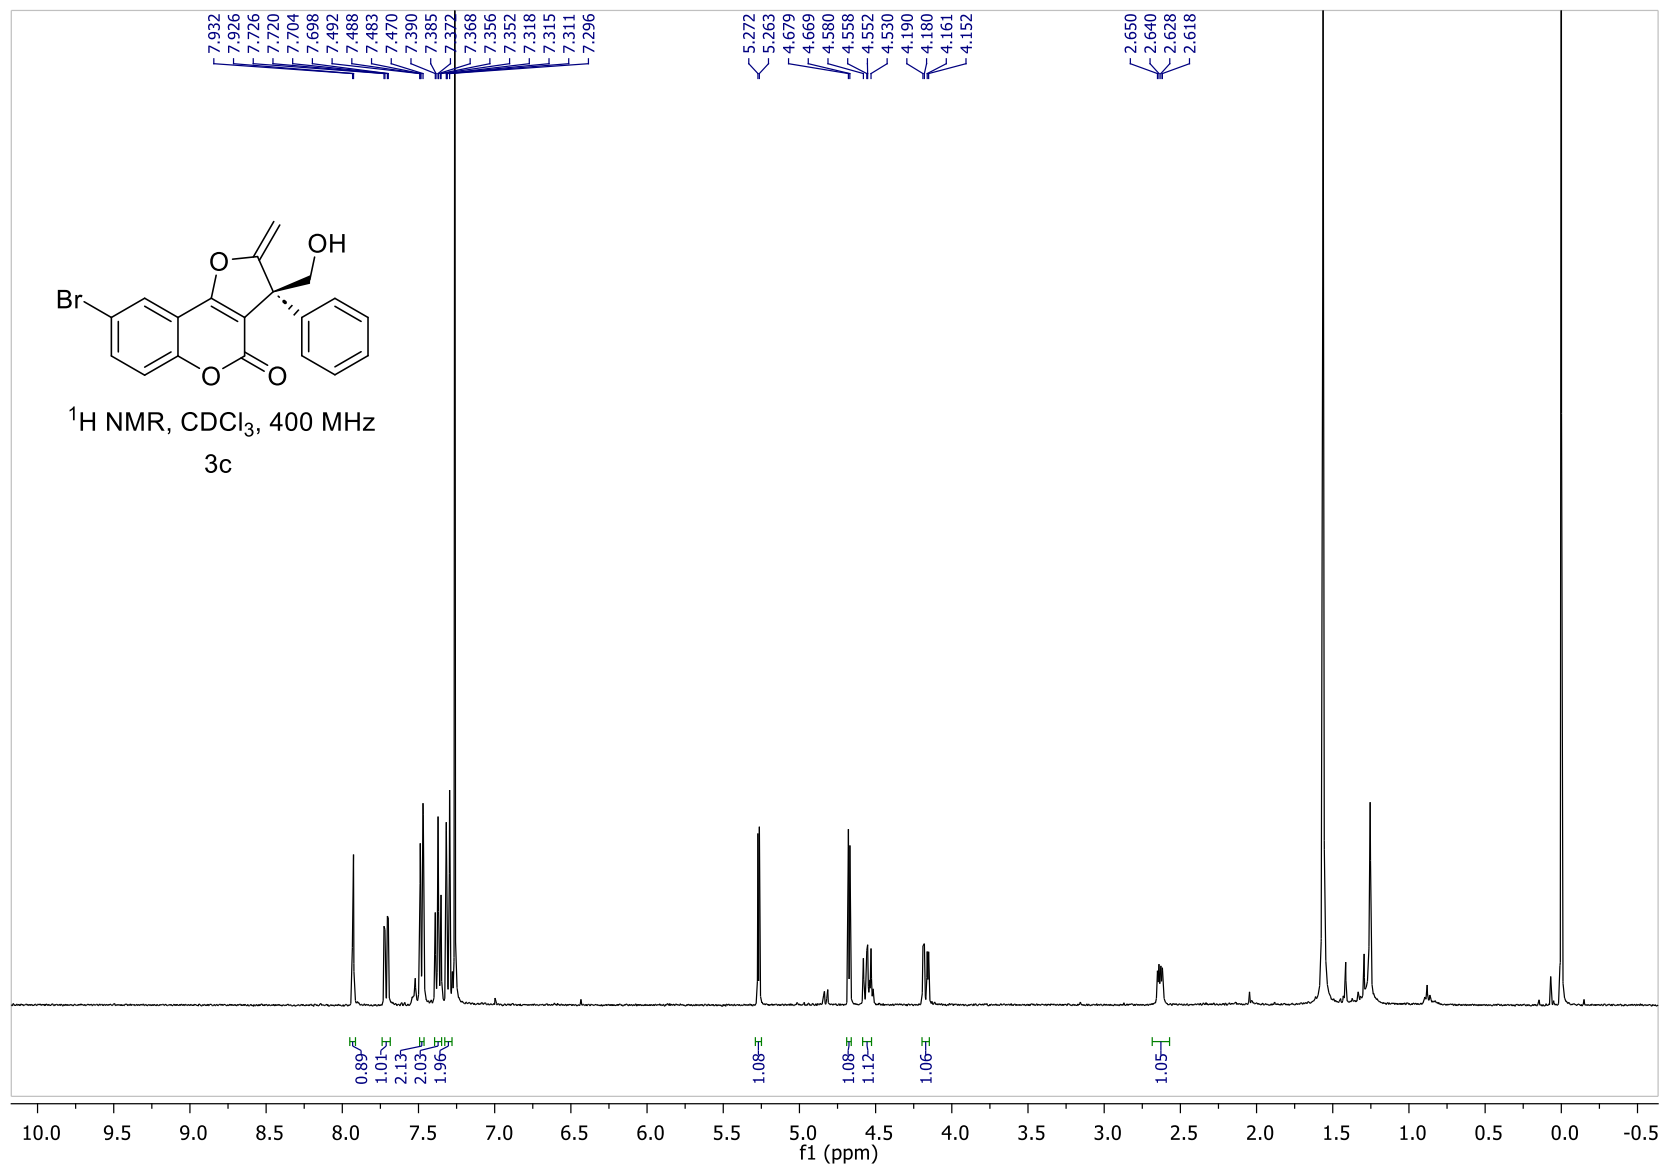

**(R)-8-Bromo-3-(hydroxymethyl)-2-methylene-3-phenyl-2,3-dihydro-4H-furo[3,2-c]chromen-4-one (3c)**

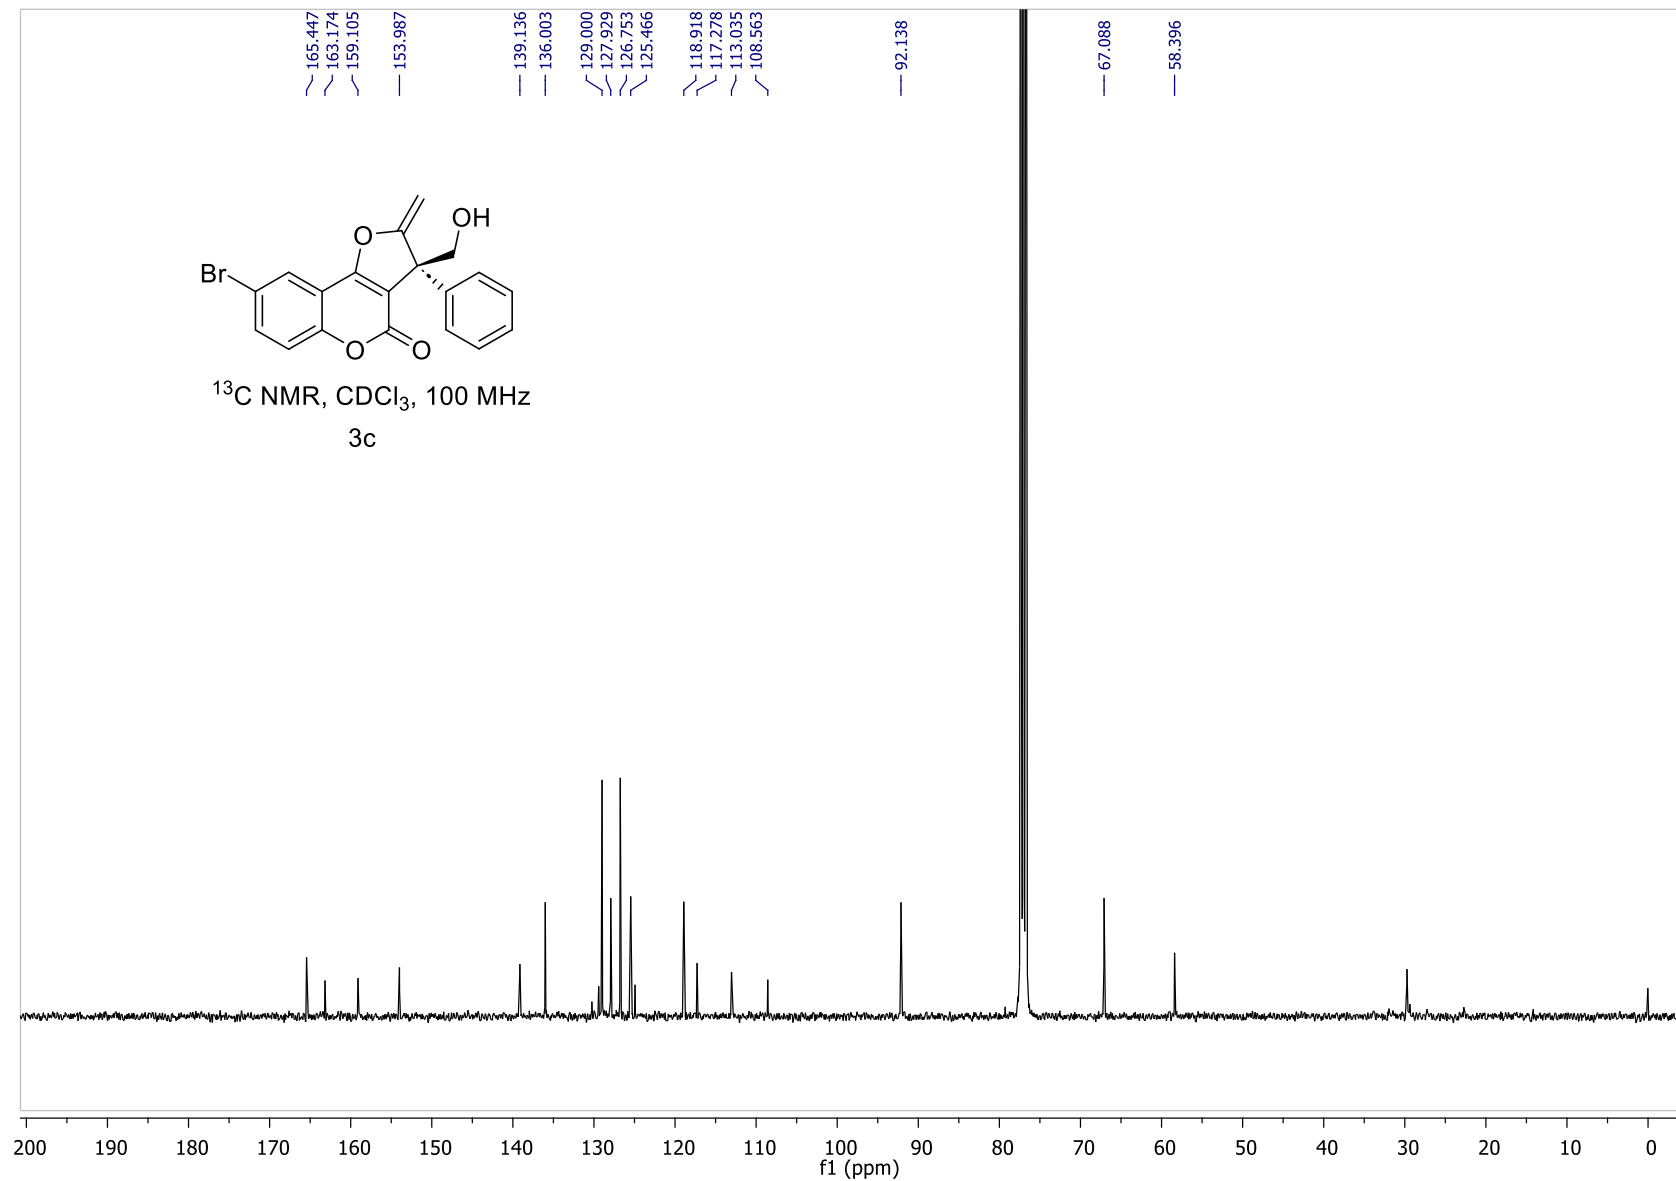

**(R)-8-Fluoro-3-(hydroxymethyl)-2-methylene-3-phenyl-2,3-dihydro-4H-furo[3,2-c]chromen-4-one (3d)**

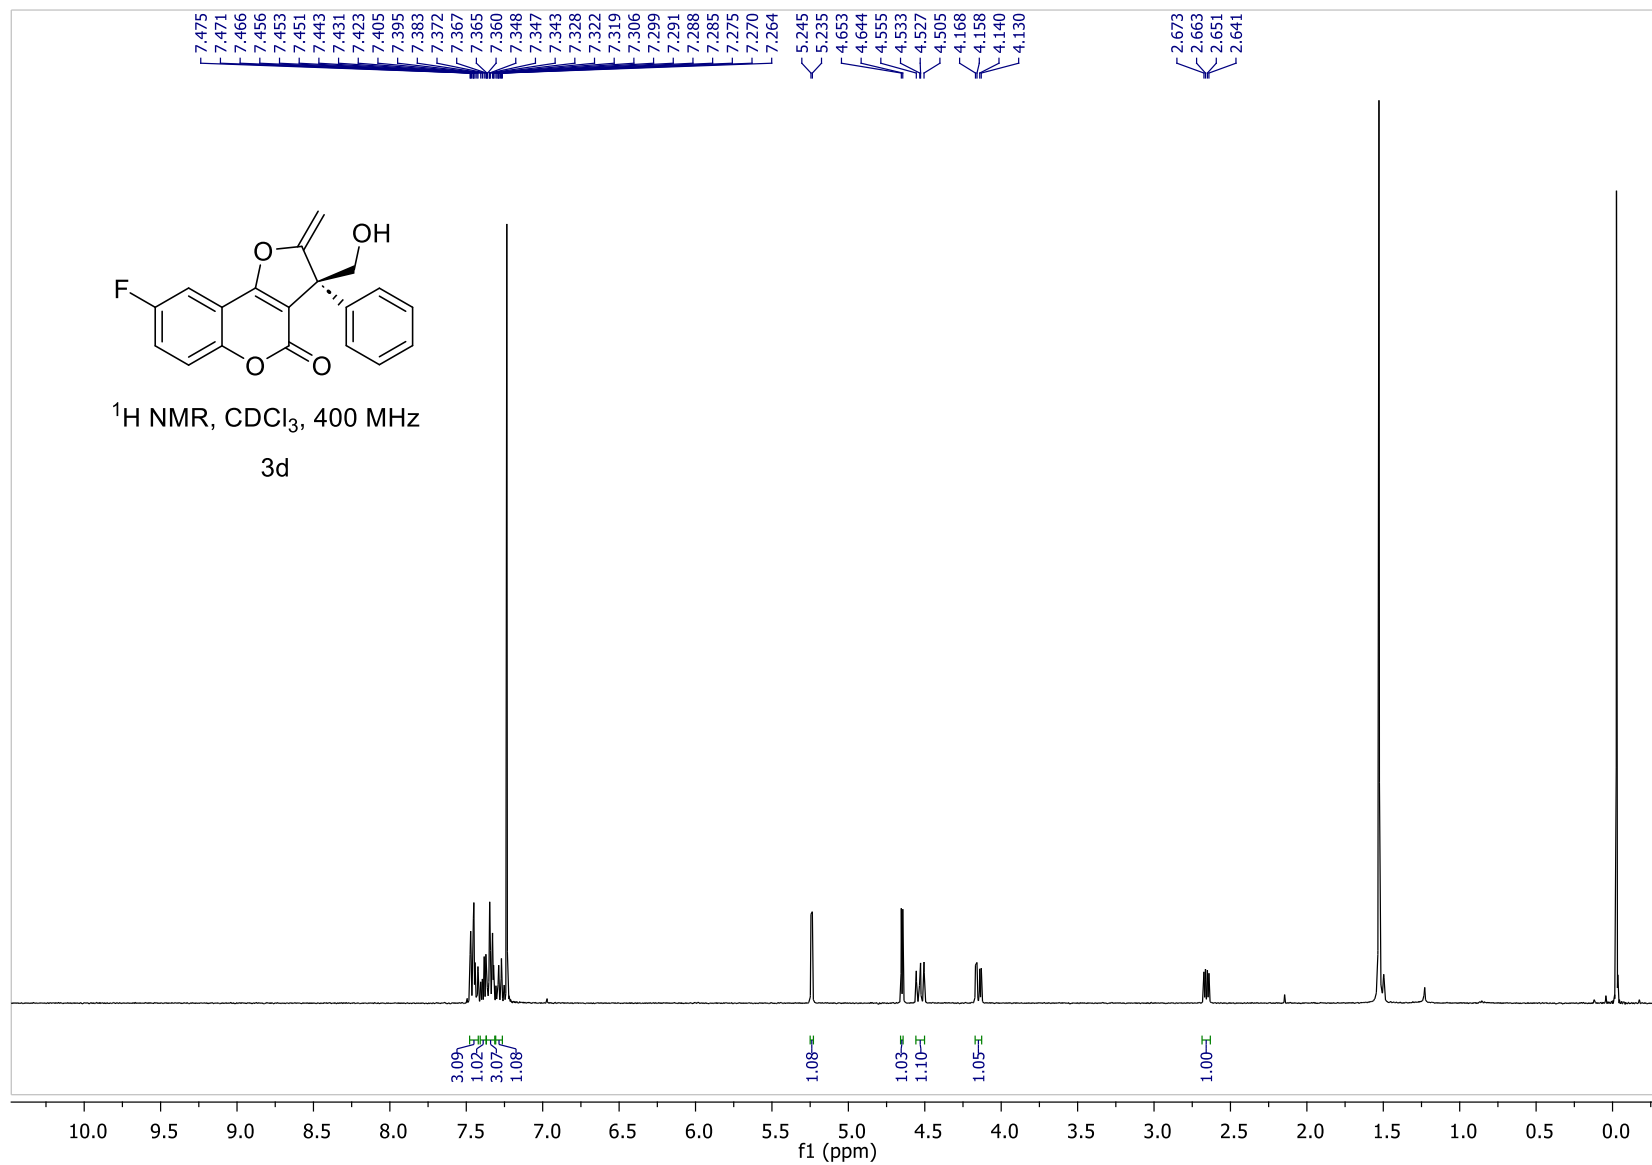

**(R)-8-Fluoro-3-(hydroxymethyl)-2-methylene-3-phenyl-2,3-dihydro-4H-furo[3,2-c]chromen-4-one (3d)**

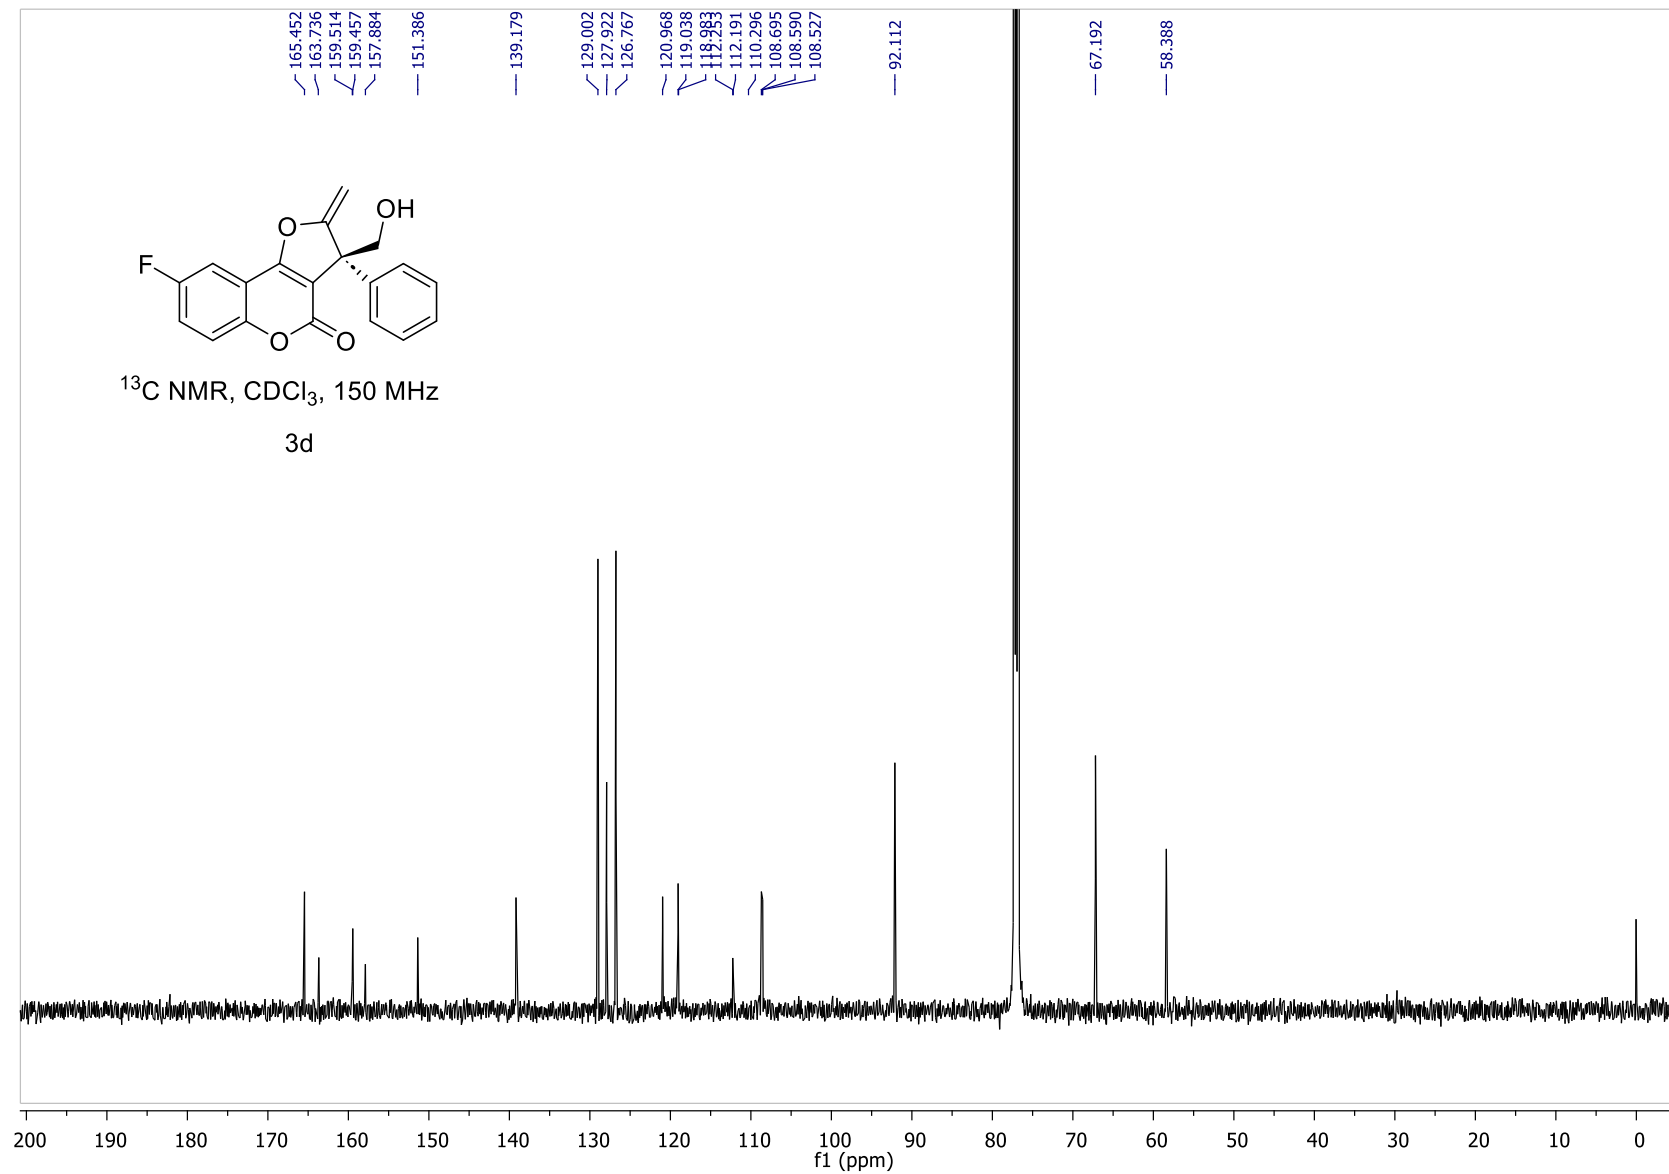



**(R)-8-Fluoro-3-(hydroxymethyl)-2-methylene-3-phenyl-2,3-dihydro-4H-furo[3,2-c]chromen-4-one (3d)**

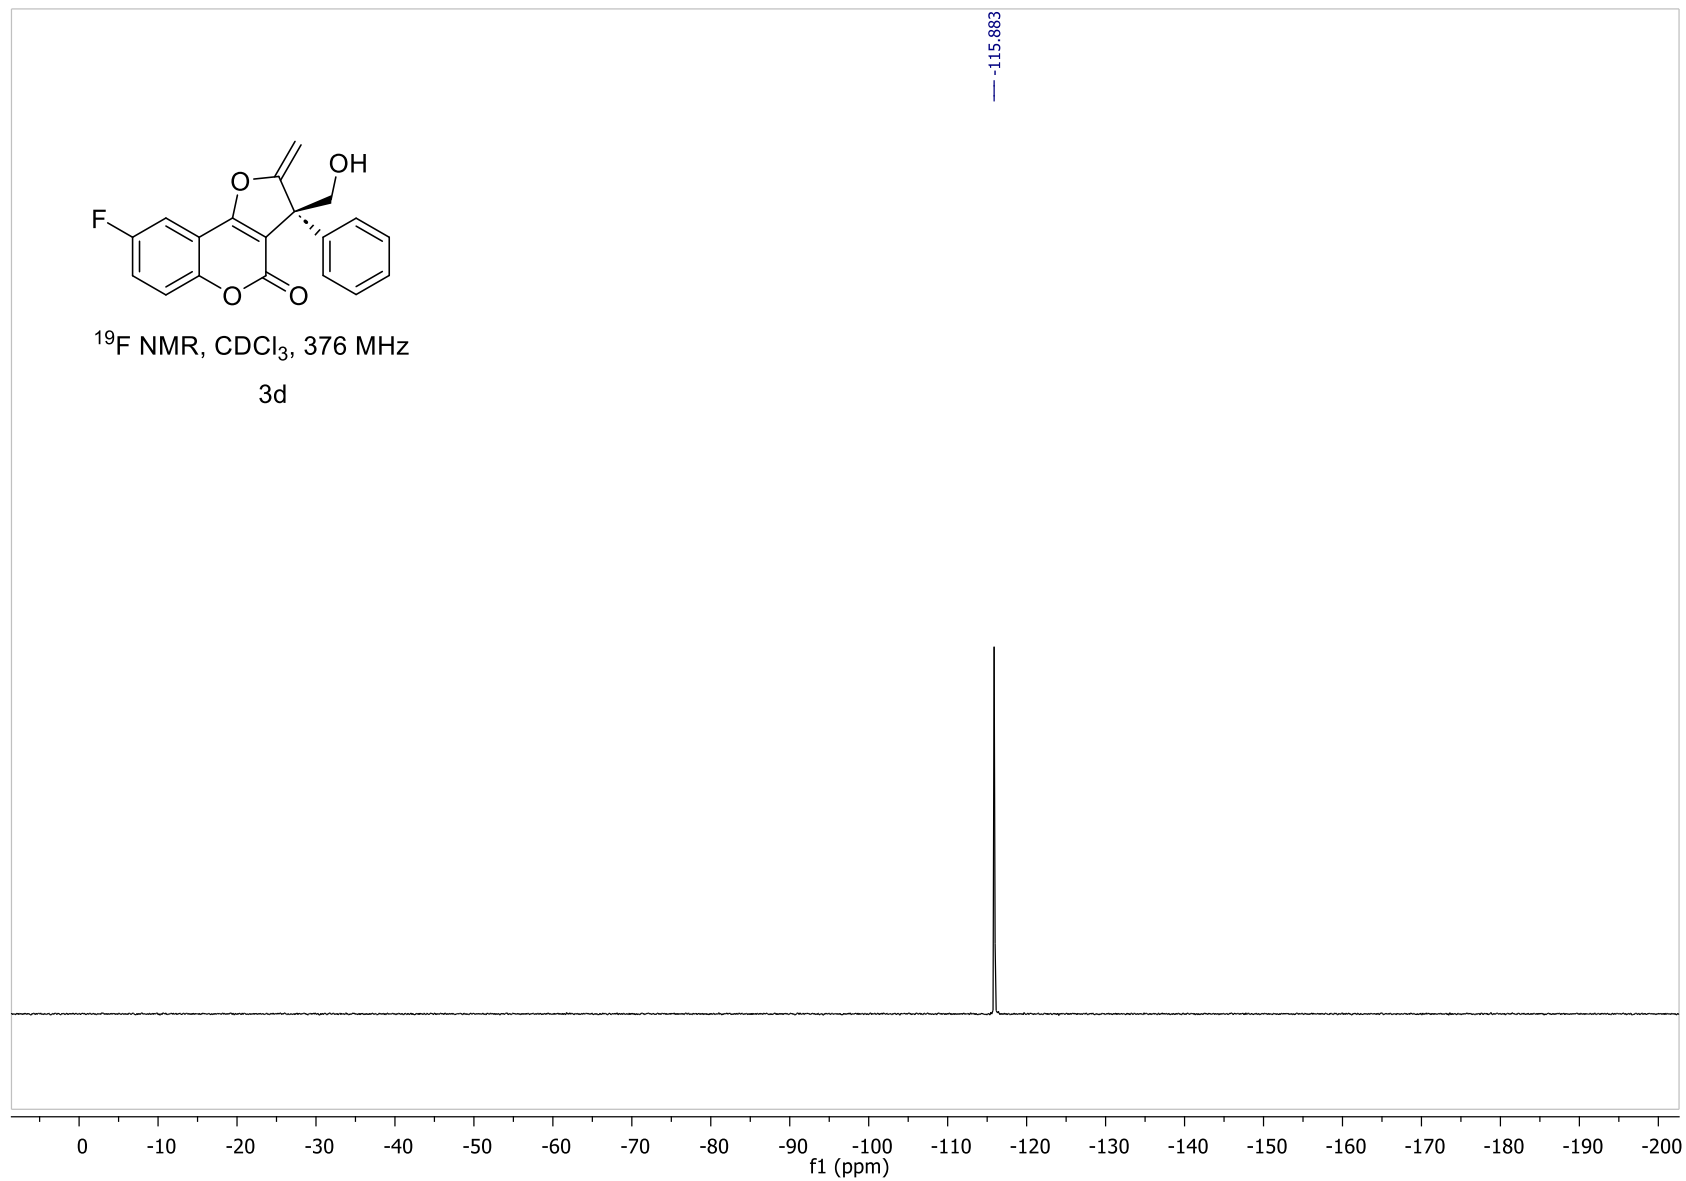

**(R)-8-Chloro-3-(hydroxymethyl)-2-methylene-3-phenyl-2,3-dihydro-4H-furo[3,2-c]chromen-4-one (3e)**

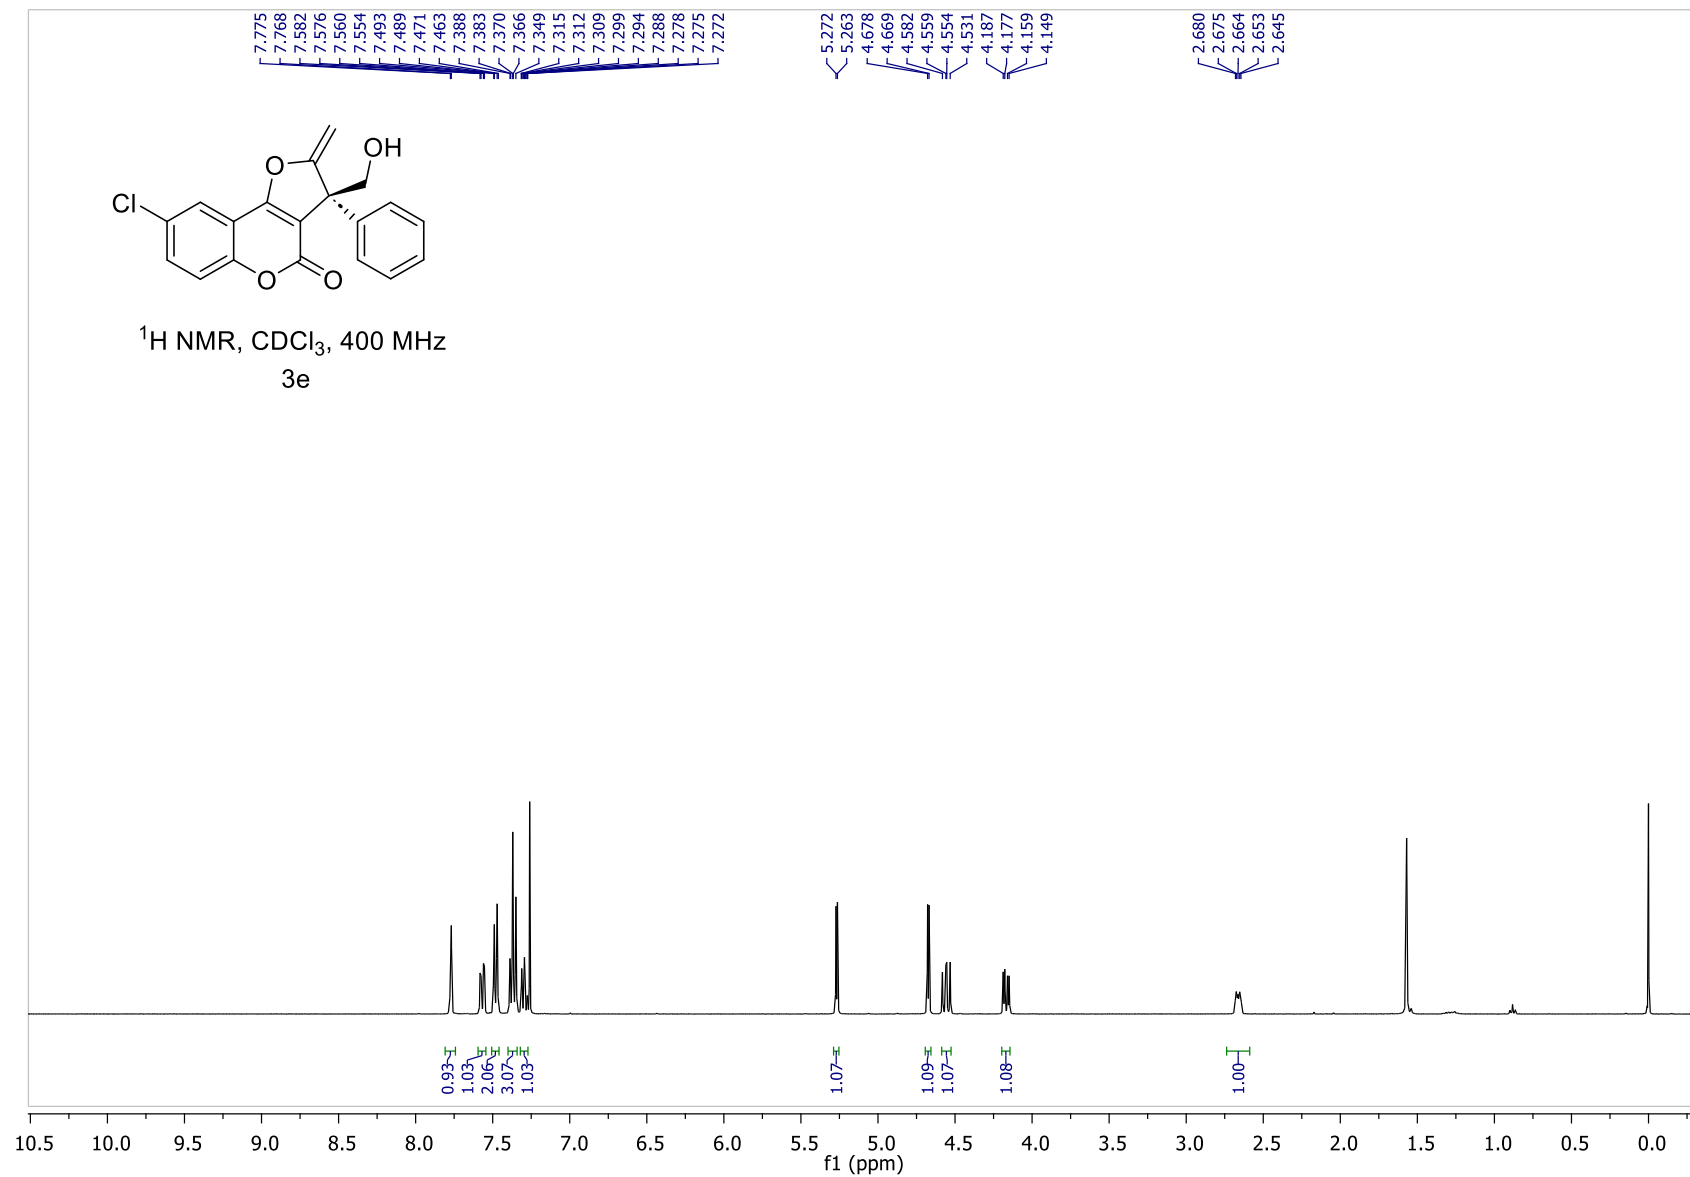

**(R)-8-Chloro-3-(hydroxymethyl)-2-methylene-3-phenyl-2,3-dihydro-4H-furo[3,2-c]chromen-4-one (3e)**

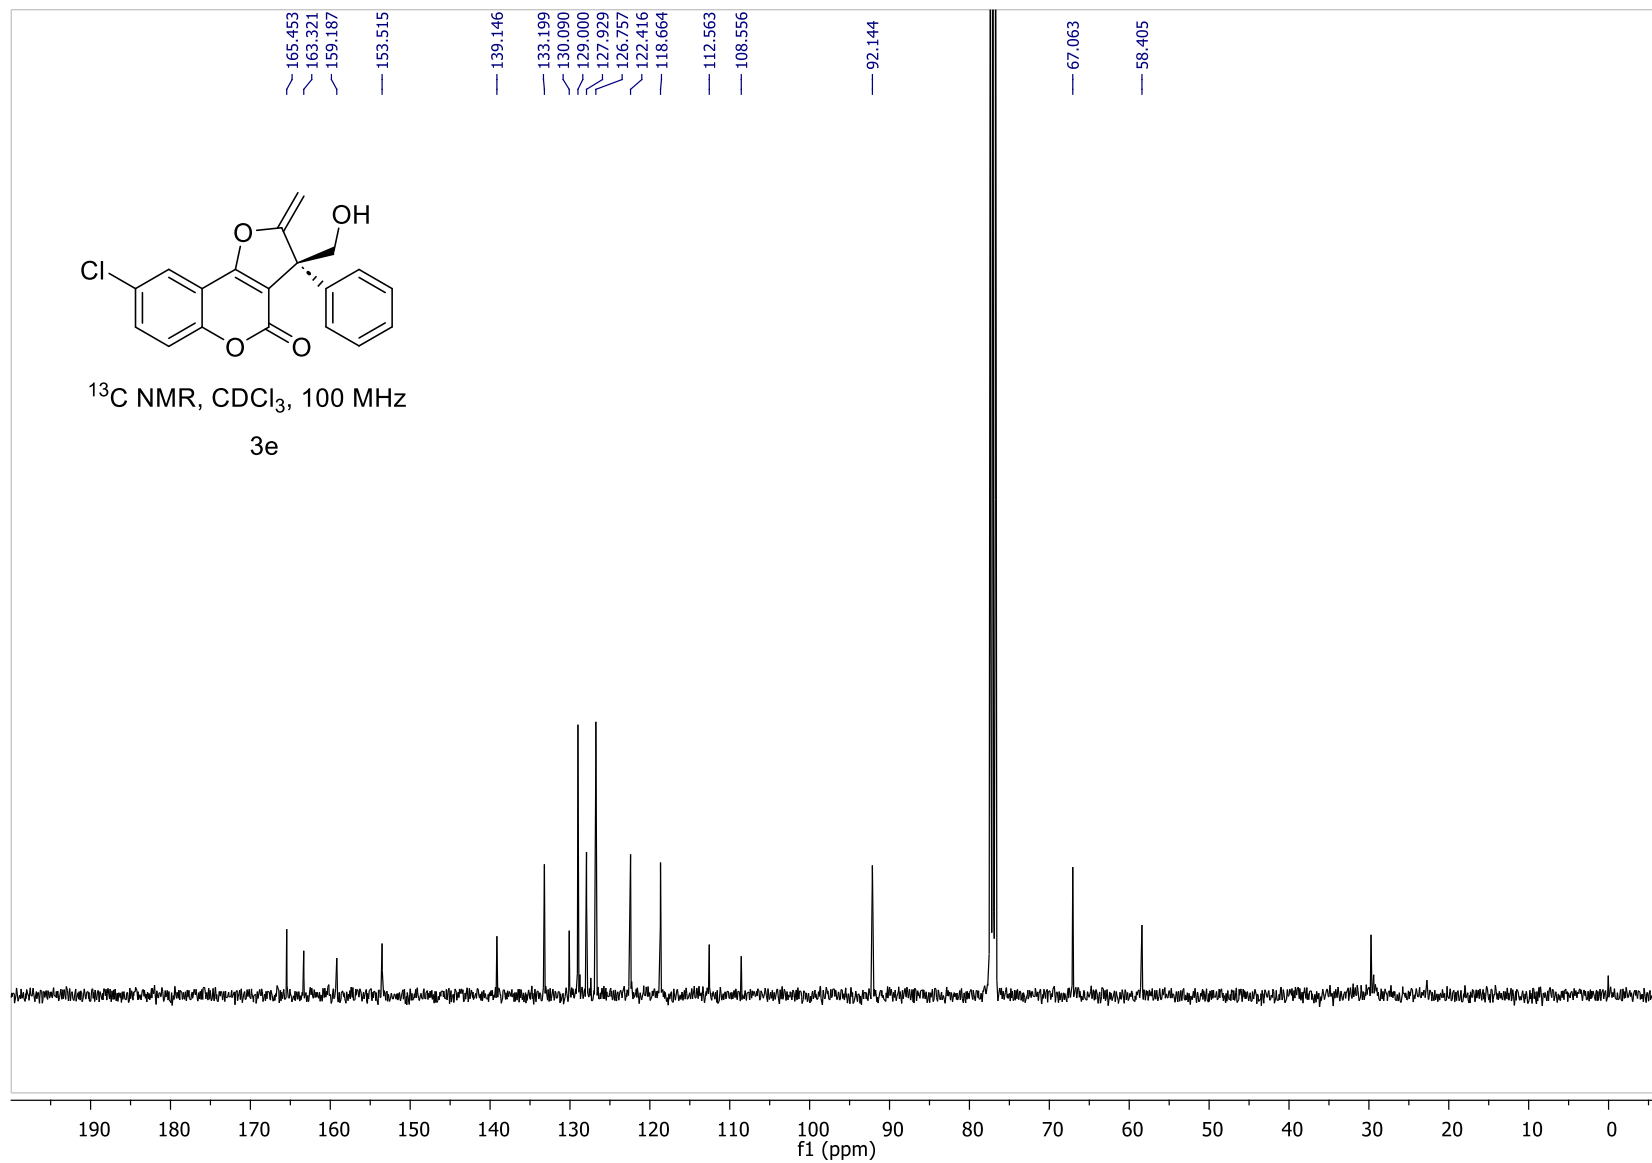

**(R)-3-(Hydroxymethyl)-2-methylene-3-(naphthalen-1-yl)-2,3-dihydro-4H-furo[3,2-c]chromen-4-one (3f)**

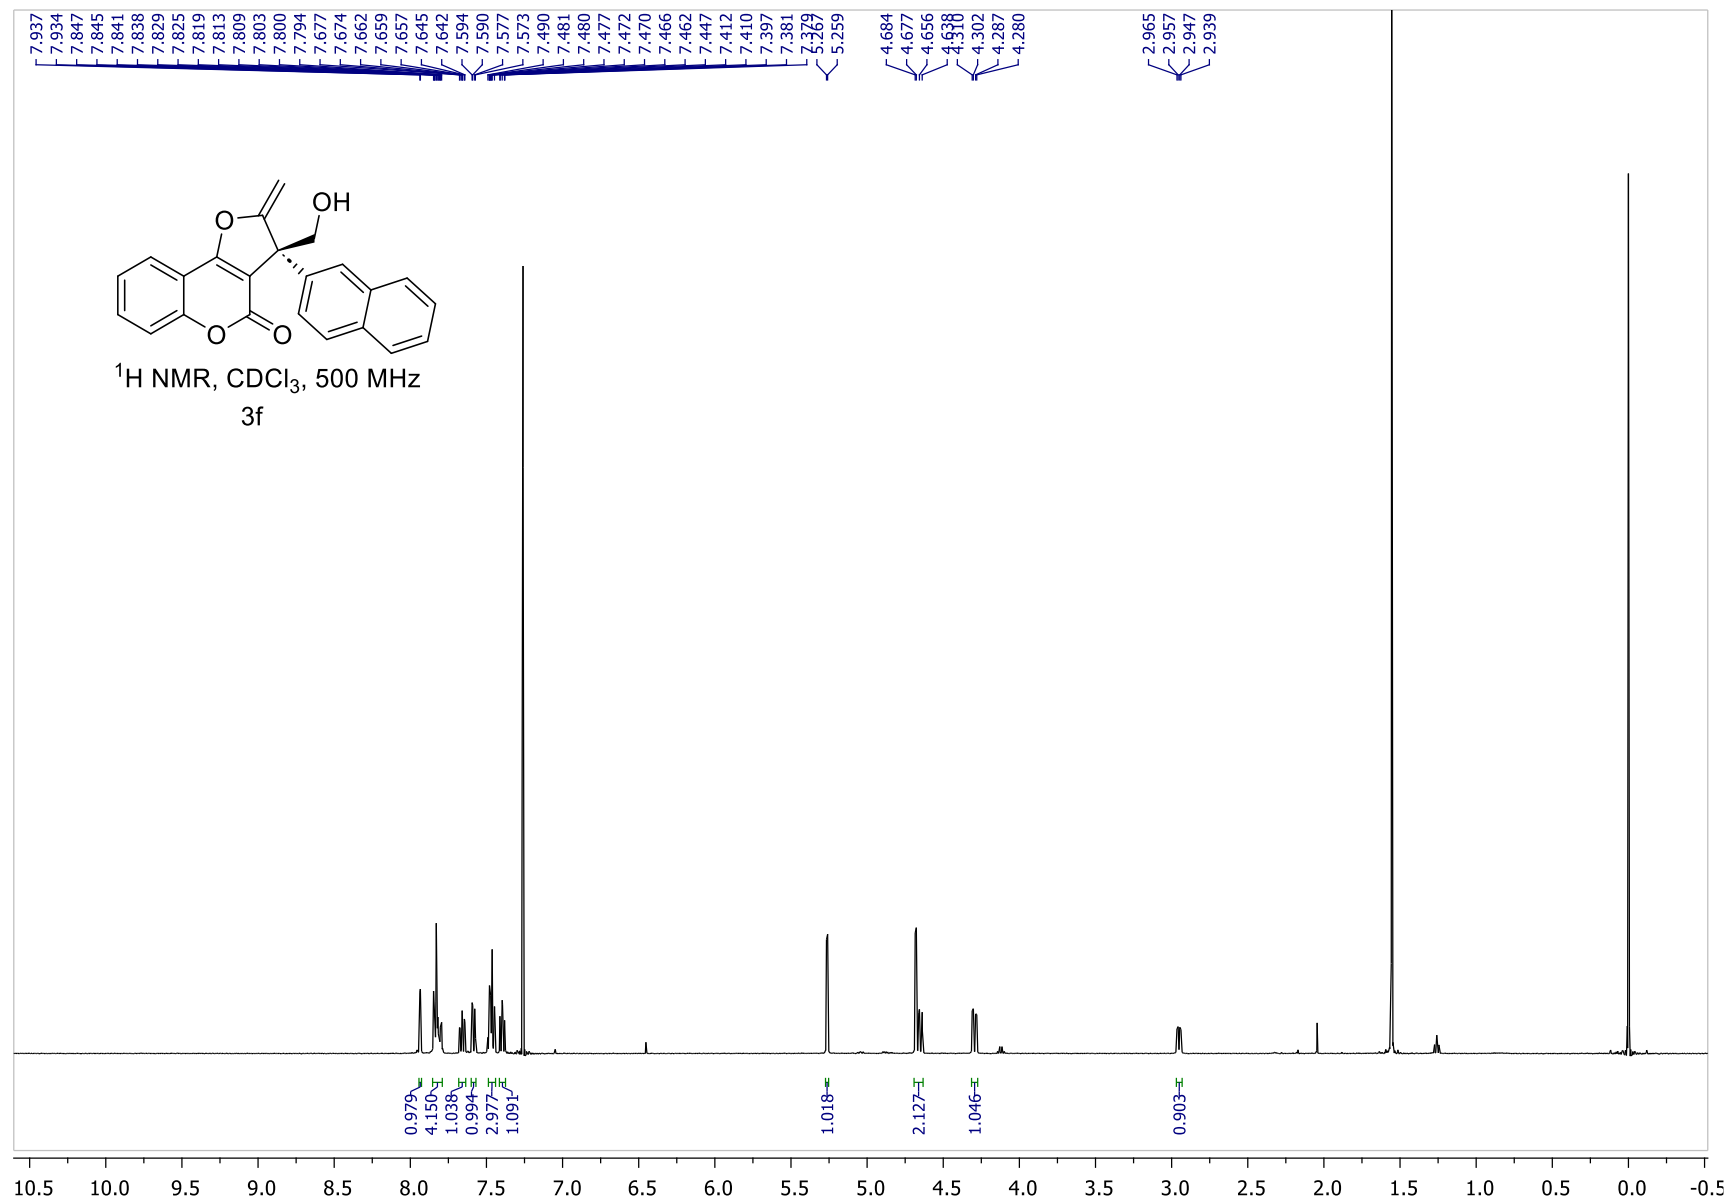

**(R)-3-(Hydroxymethyl)-2-methylene-3-(naphthalen-1-yl)-2,3-dihydro-4H-furo[3,2-c]chromen-4-one (3f)**

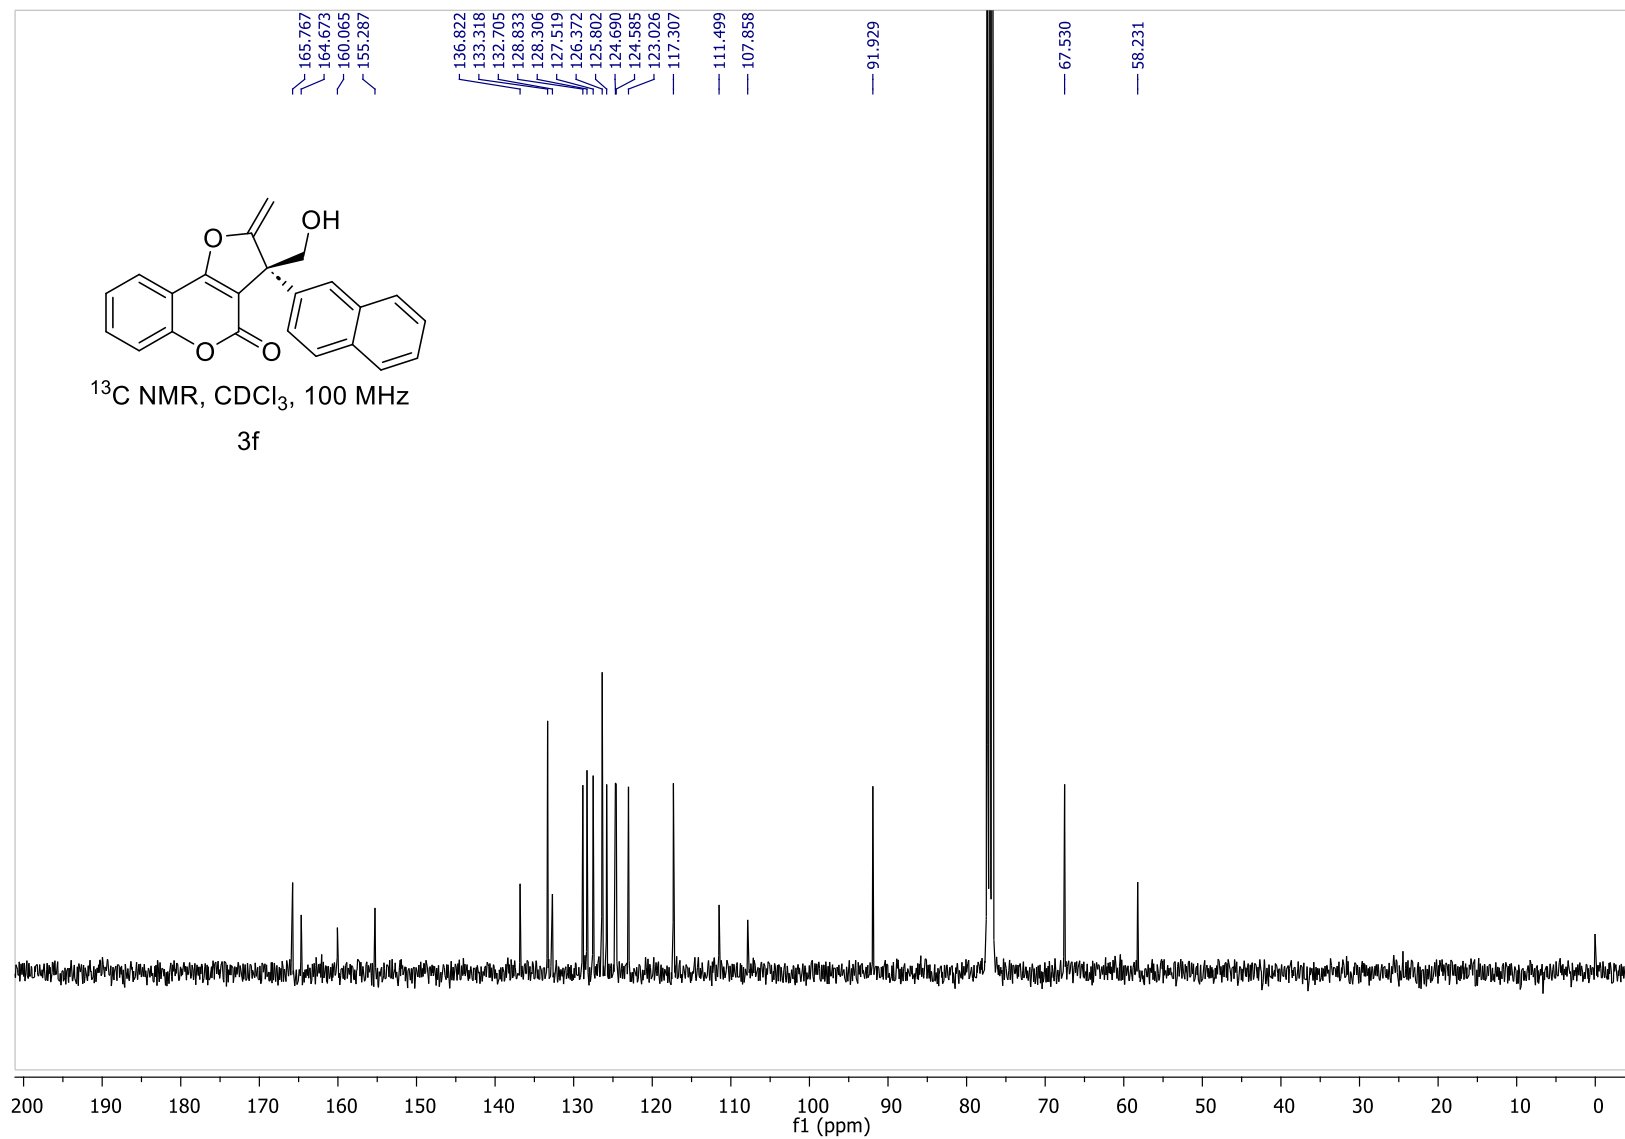

**(R)-3-(Hydroxymethyl)-8-methyl-2-methylene-3-(naphthalen-2-yl)-2,3-dihydro-4H-furo[3,2-c]chromen-4-one (3g)**

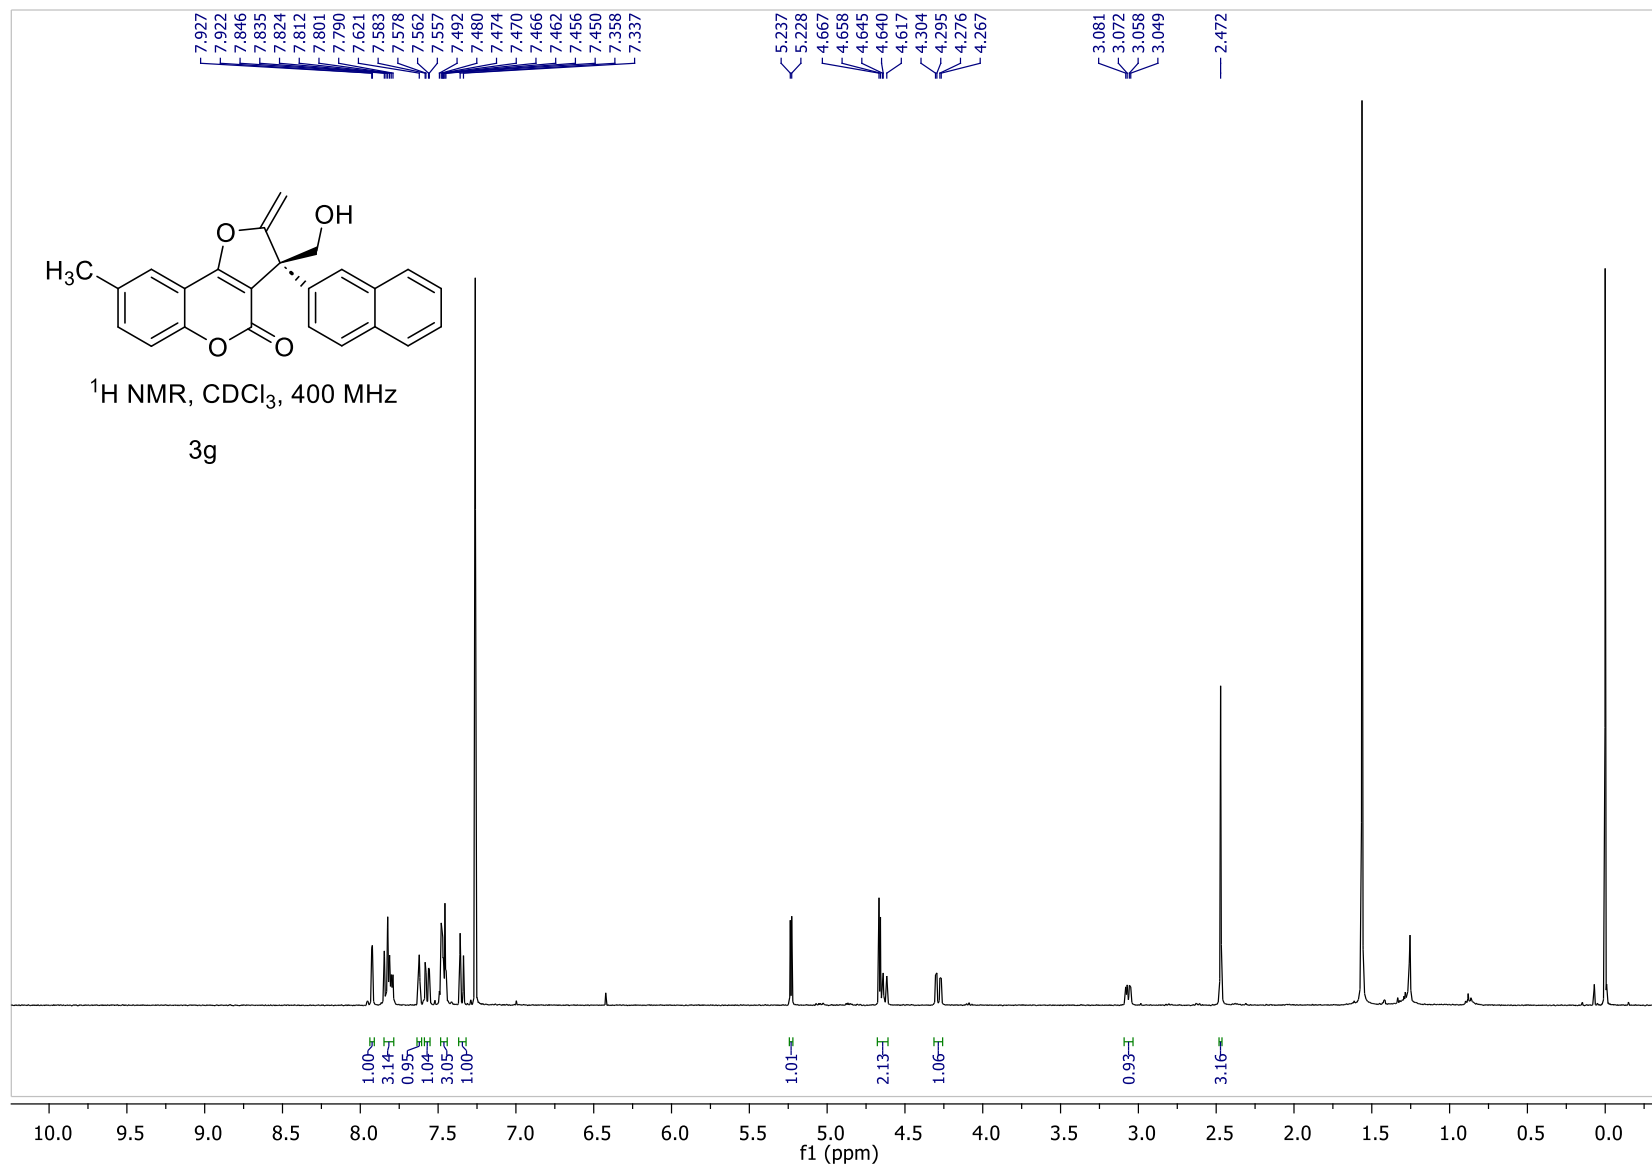

**(R)-3-(Hydroxymethyl)-8-methyl-2-methylene-3-(naphthalen-2-yl)-2,3-dihydro-4H-furo[3,2-c]chromen-4-one (3g)**

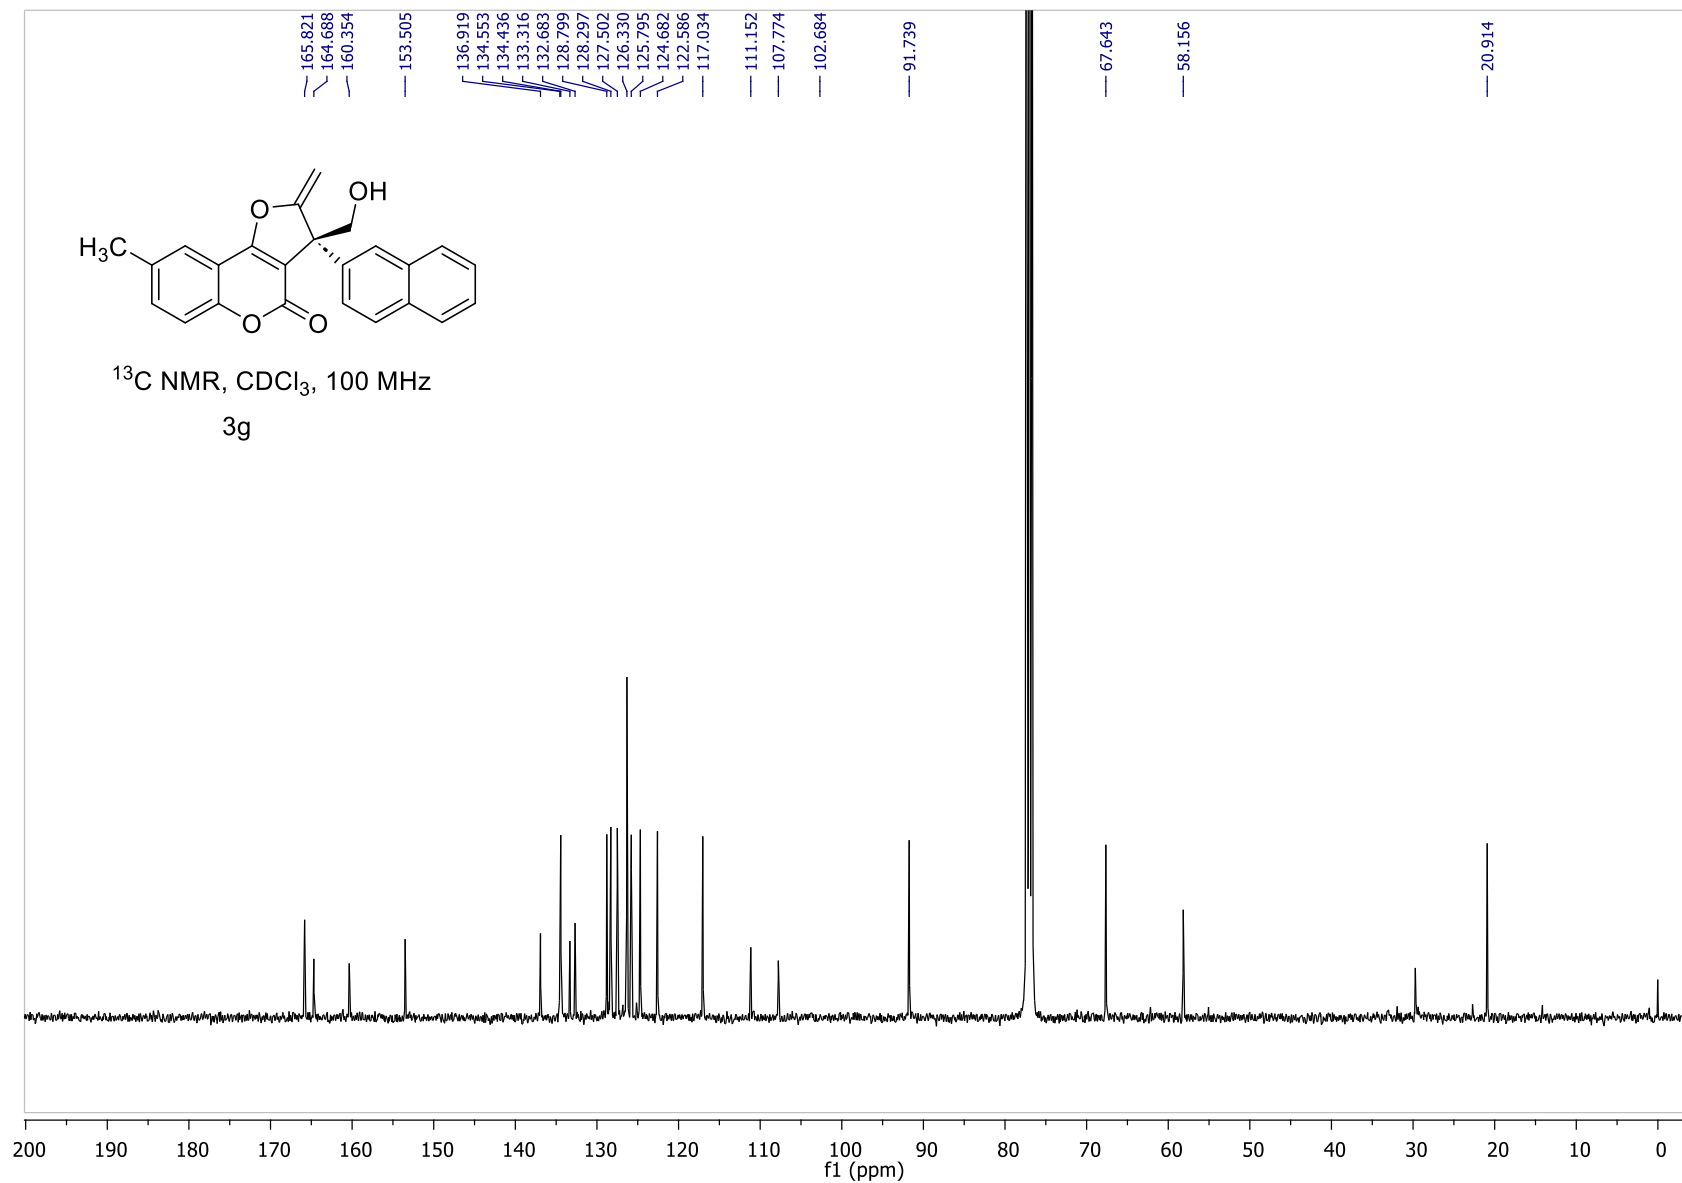

**(R)-3-(Hydroxymethyl)-7-methyl-2-methylene-3-phenyl-2,3-dihydro-4H-furo[3,2-c]chromen-4-one (3h)**

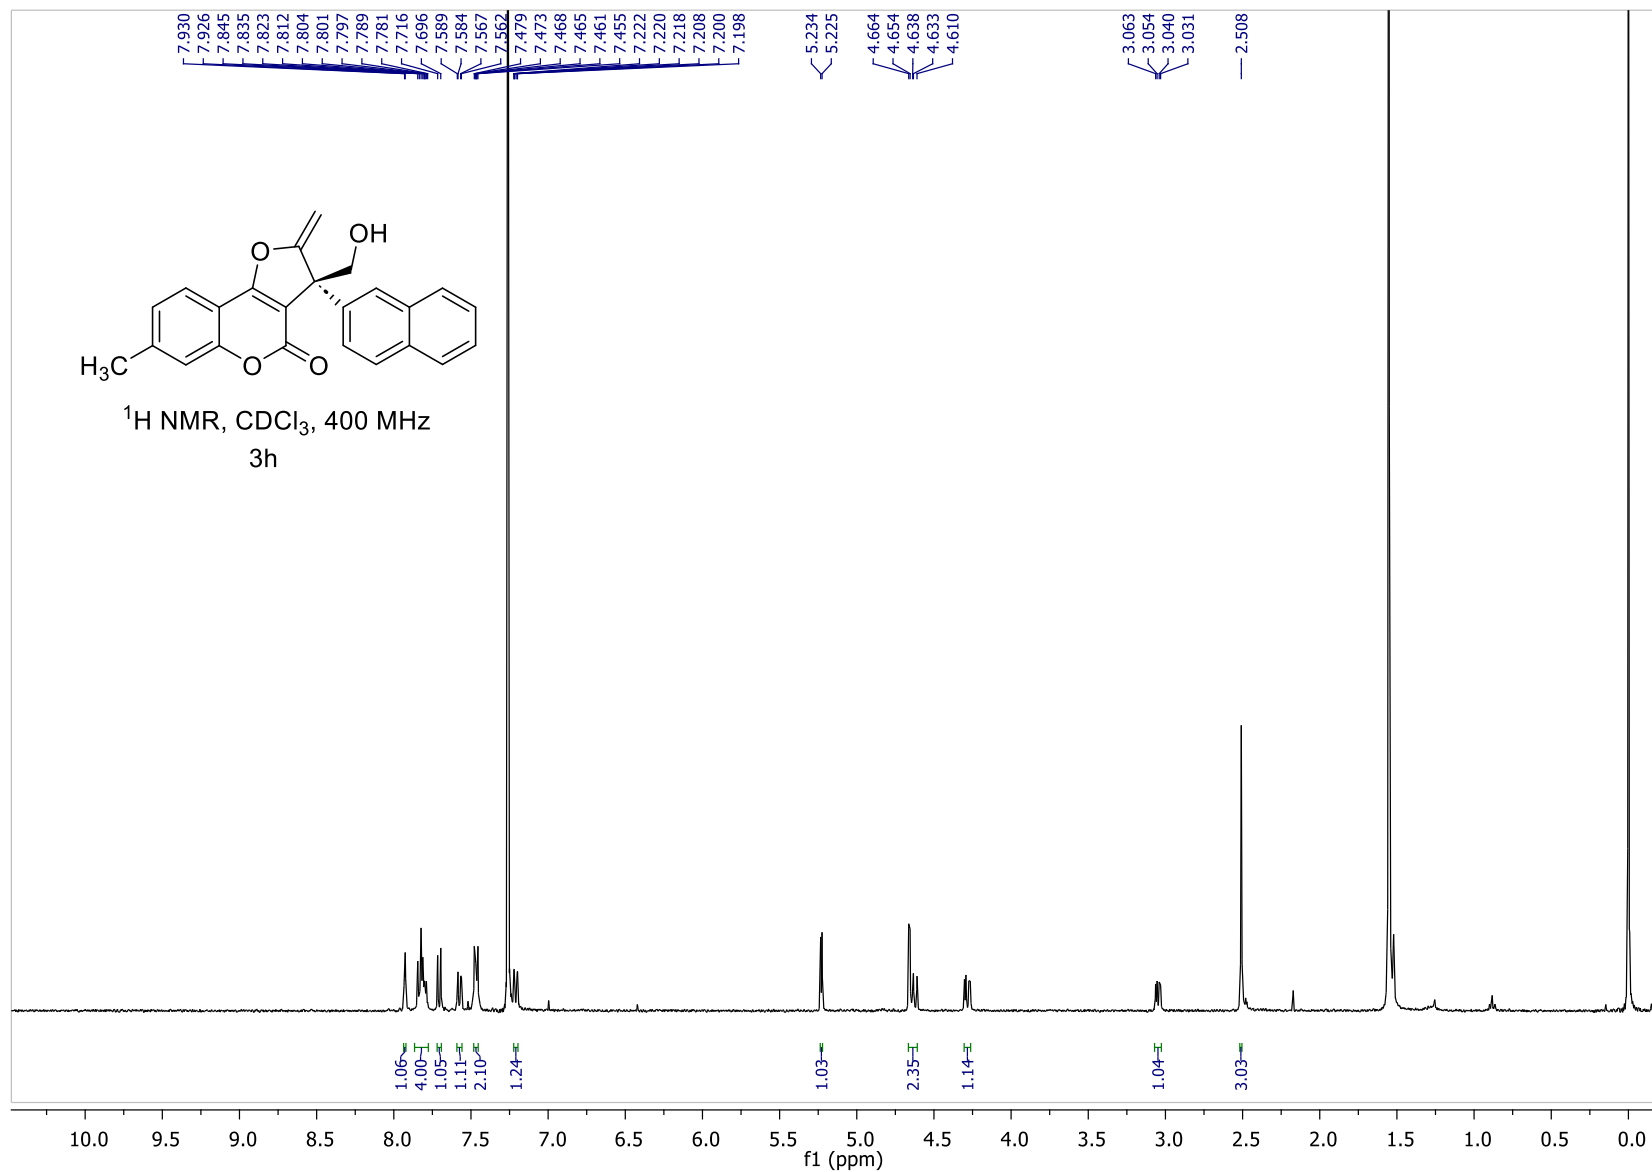



**(R)-3-(Hydroxymethyl)-7-methyl-2-methylene-3-phenyl-2,3-dihydro-4H-furo[3,2-c]chromen-4-one (3h)**

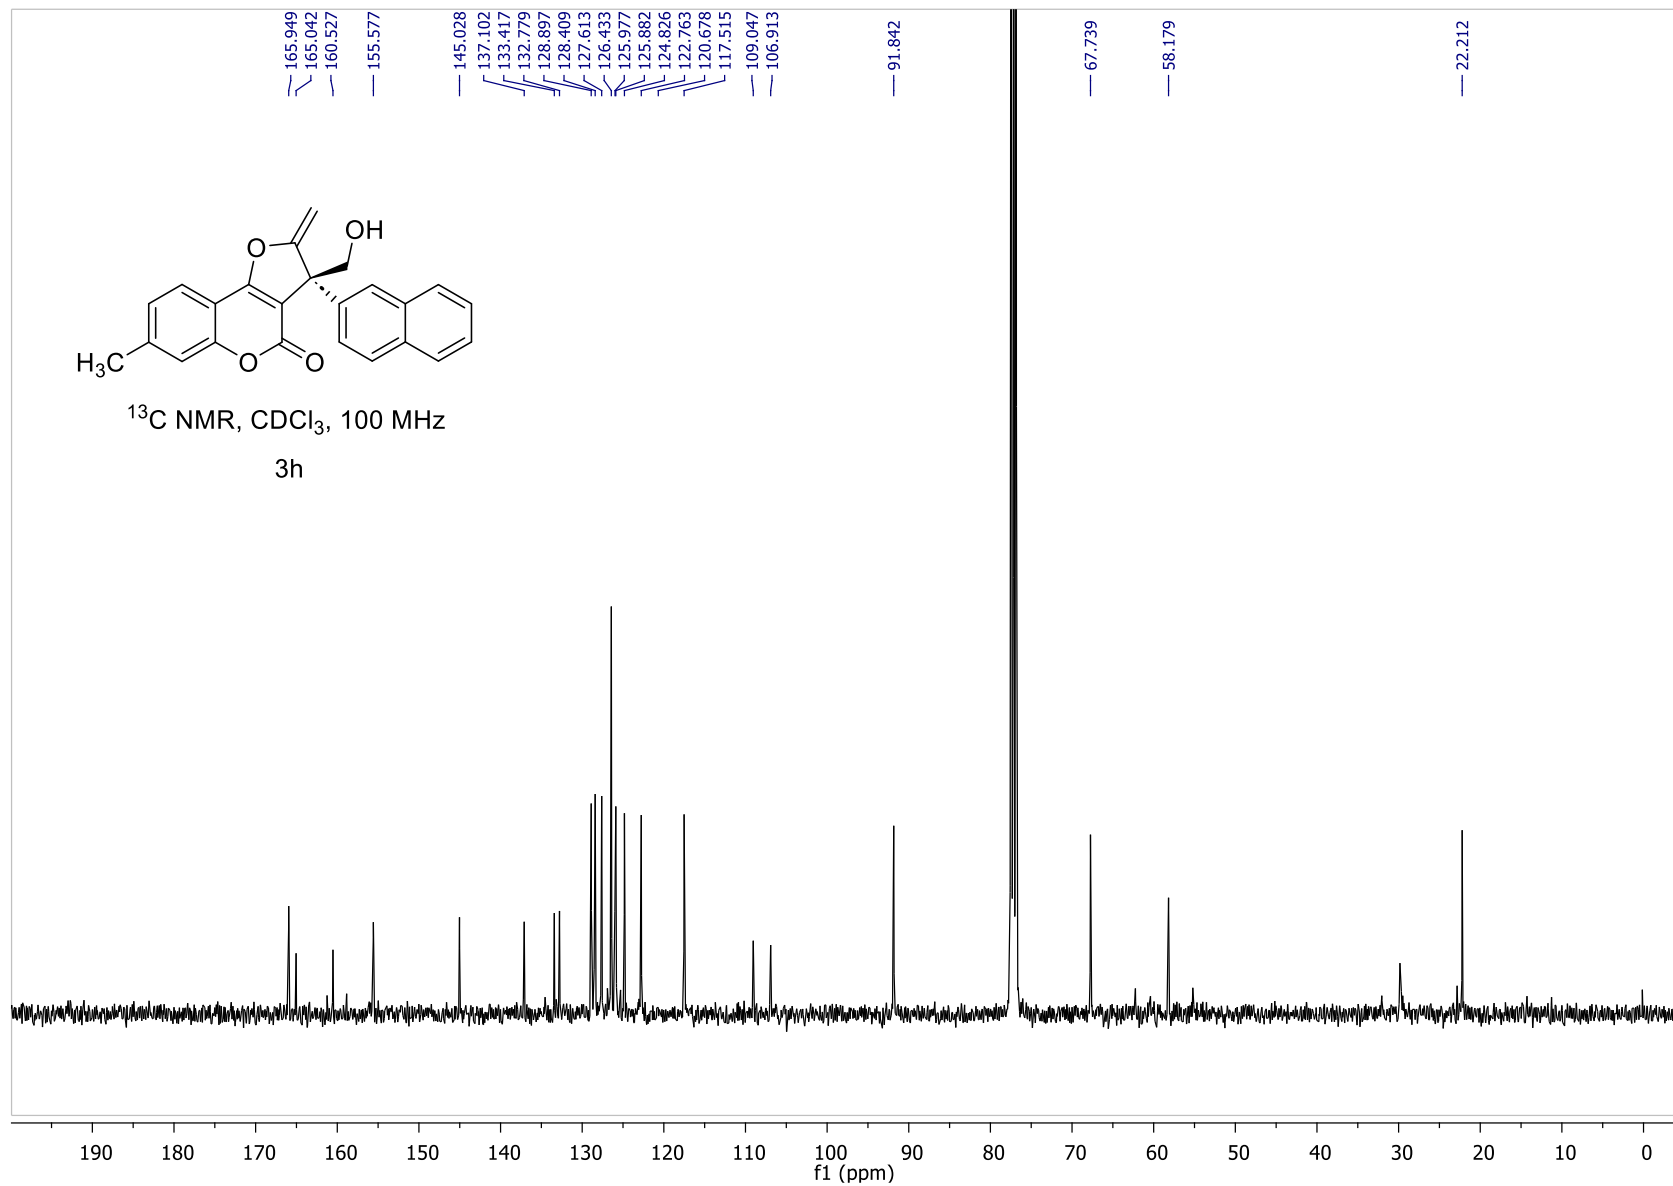

**(R)-8-Bromo-3-(hydroxymethyl)-2-methylene-3-(naphthalen-2-yl)-2,3-dihydro-4H-furo[3,2-c]chromen-4-one (3i)**

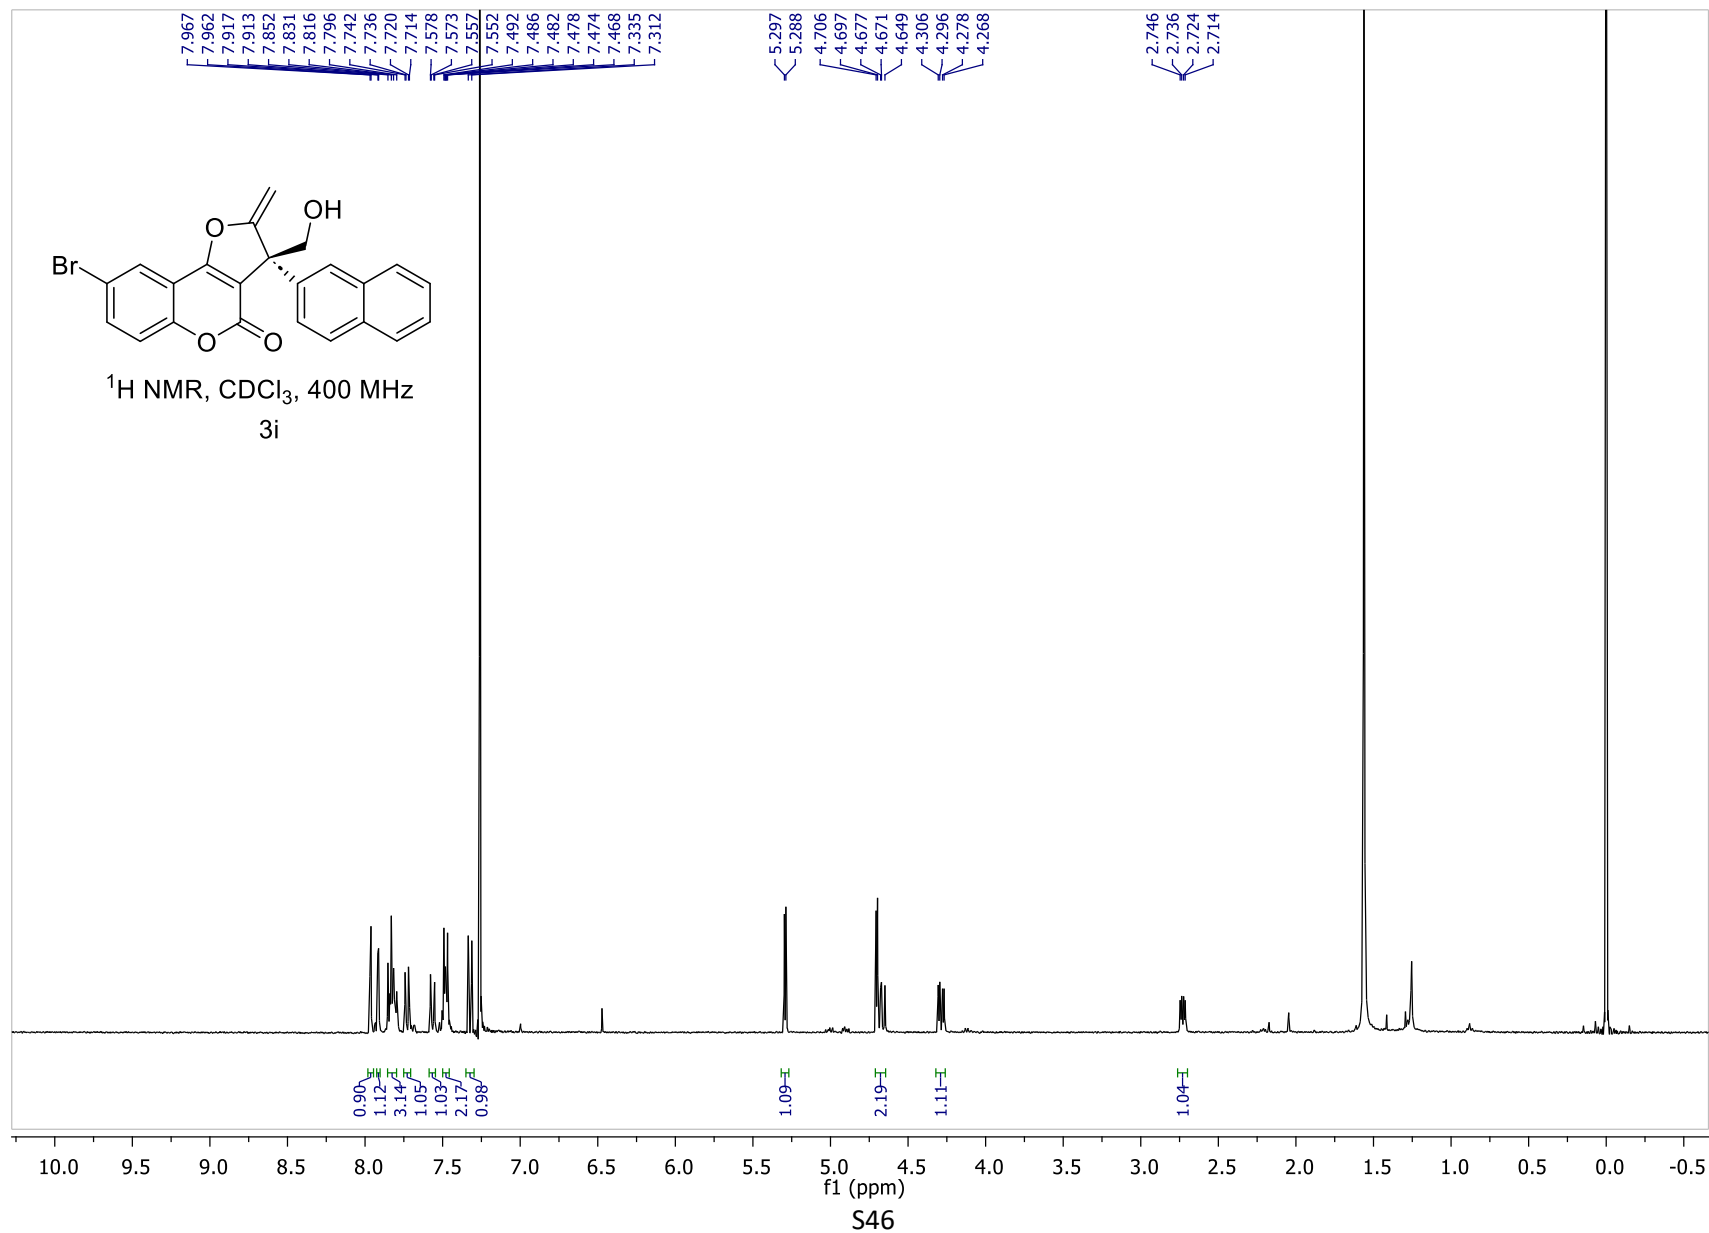

**(R)-8-Bromo-3-(hydroxymethyl)-2-methylene-3-(naphthalen-2-yl)-2,3-dihydro-4H-furo[3,2-c]chromen-4-one (3i)**

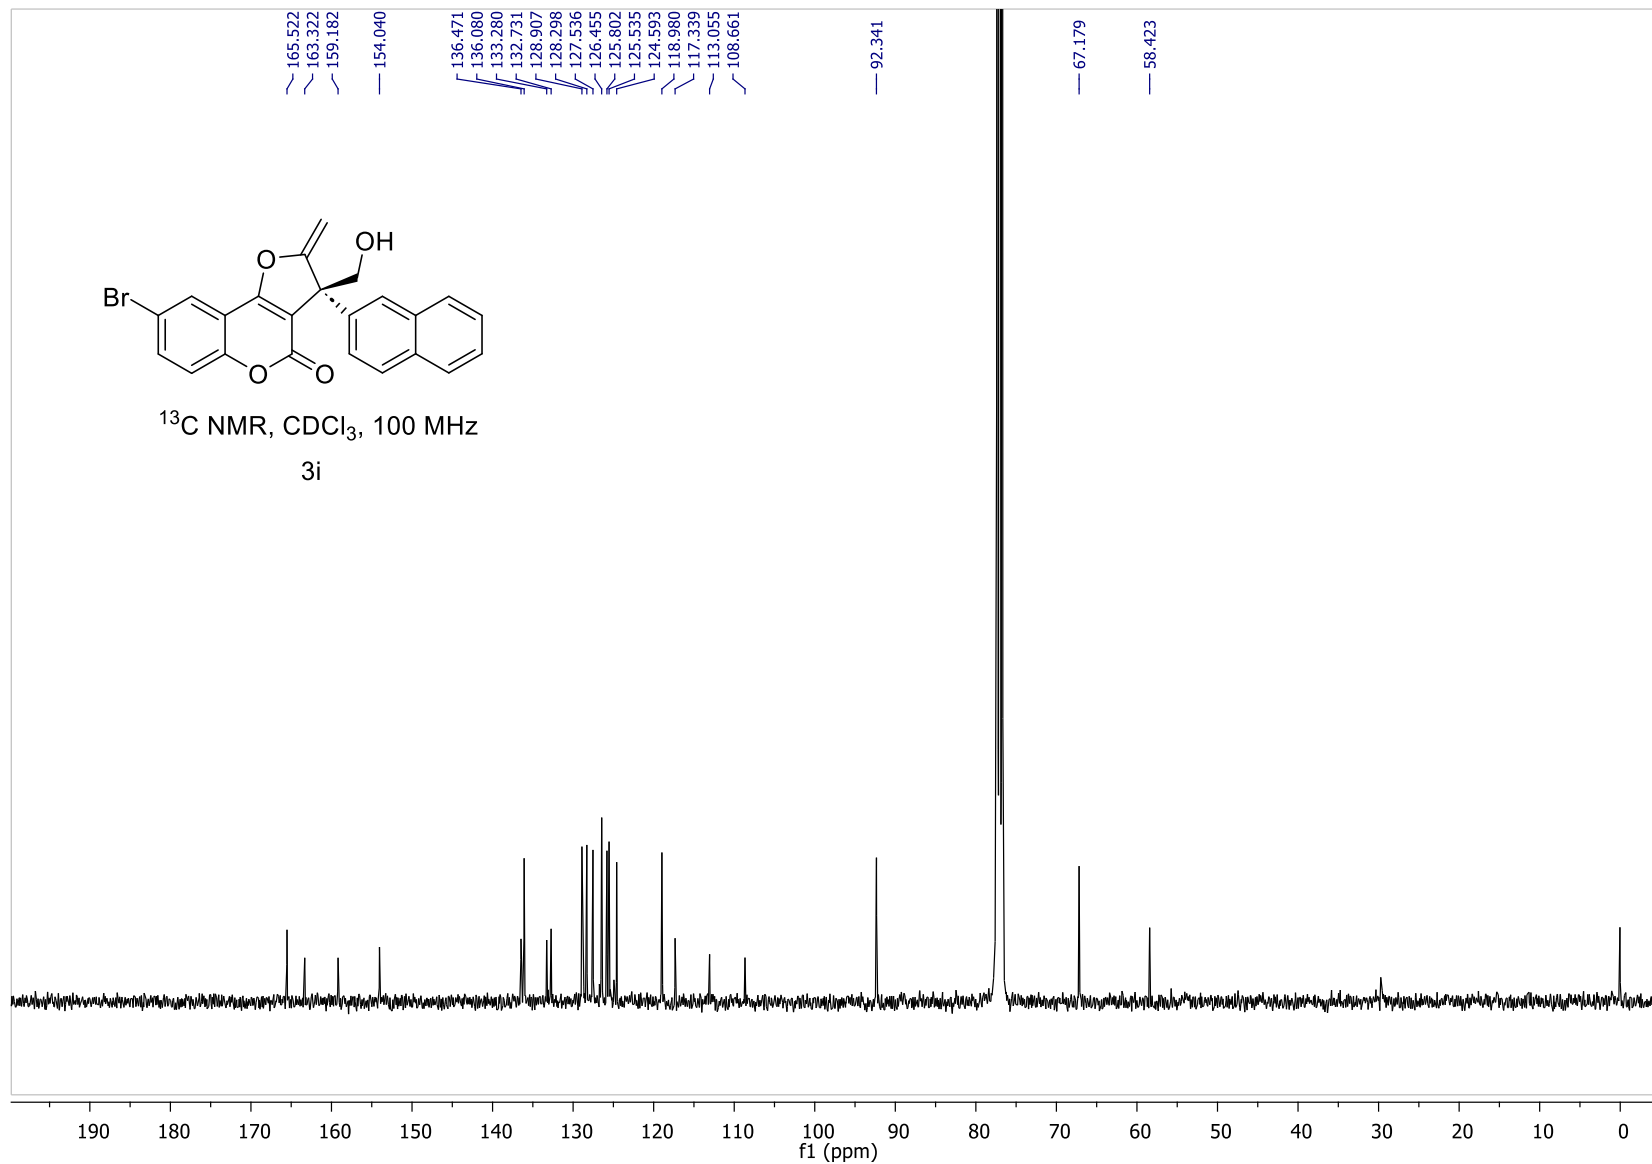

**(R)-3-(hydroxymethyl)-7-methoxy-2-methylene-3-(naphthalen-2-yl)-2,3-dihydro-4H-furo[3,2-c]chromen-4-one (3j)**

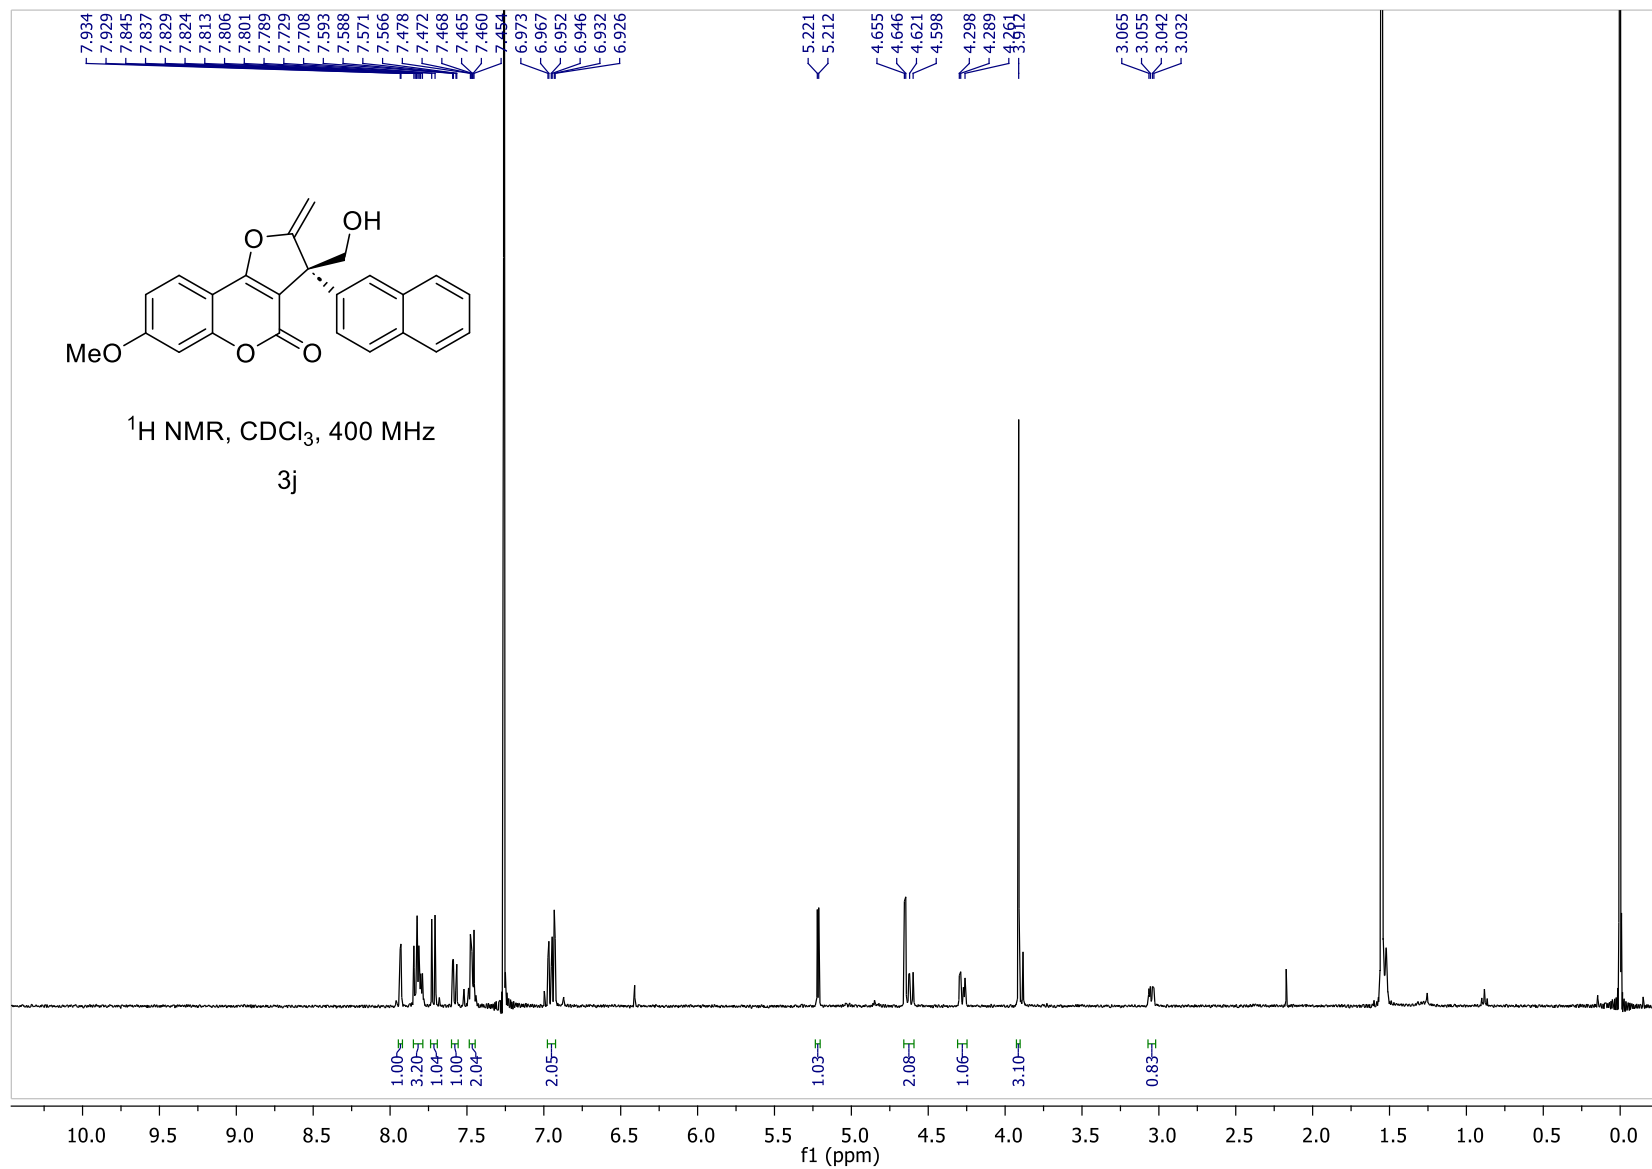

**(R)-3-(hydroxymethyl)-7-methoxy-2-methylene-3-(naphthalen-2-yl)-2,3-dihydro-4H-furo[3,2-c]chromen-4-one (3j)**

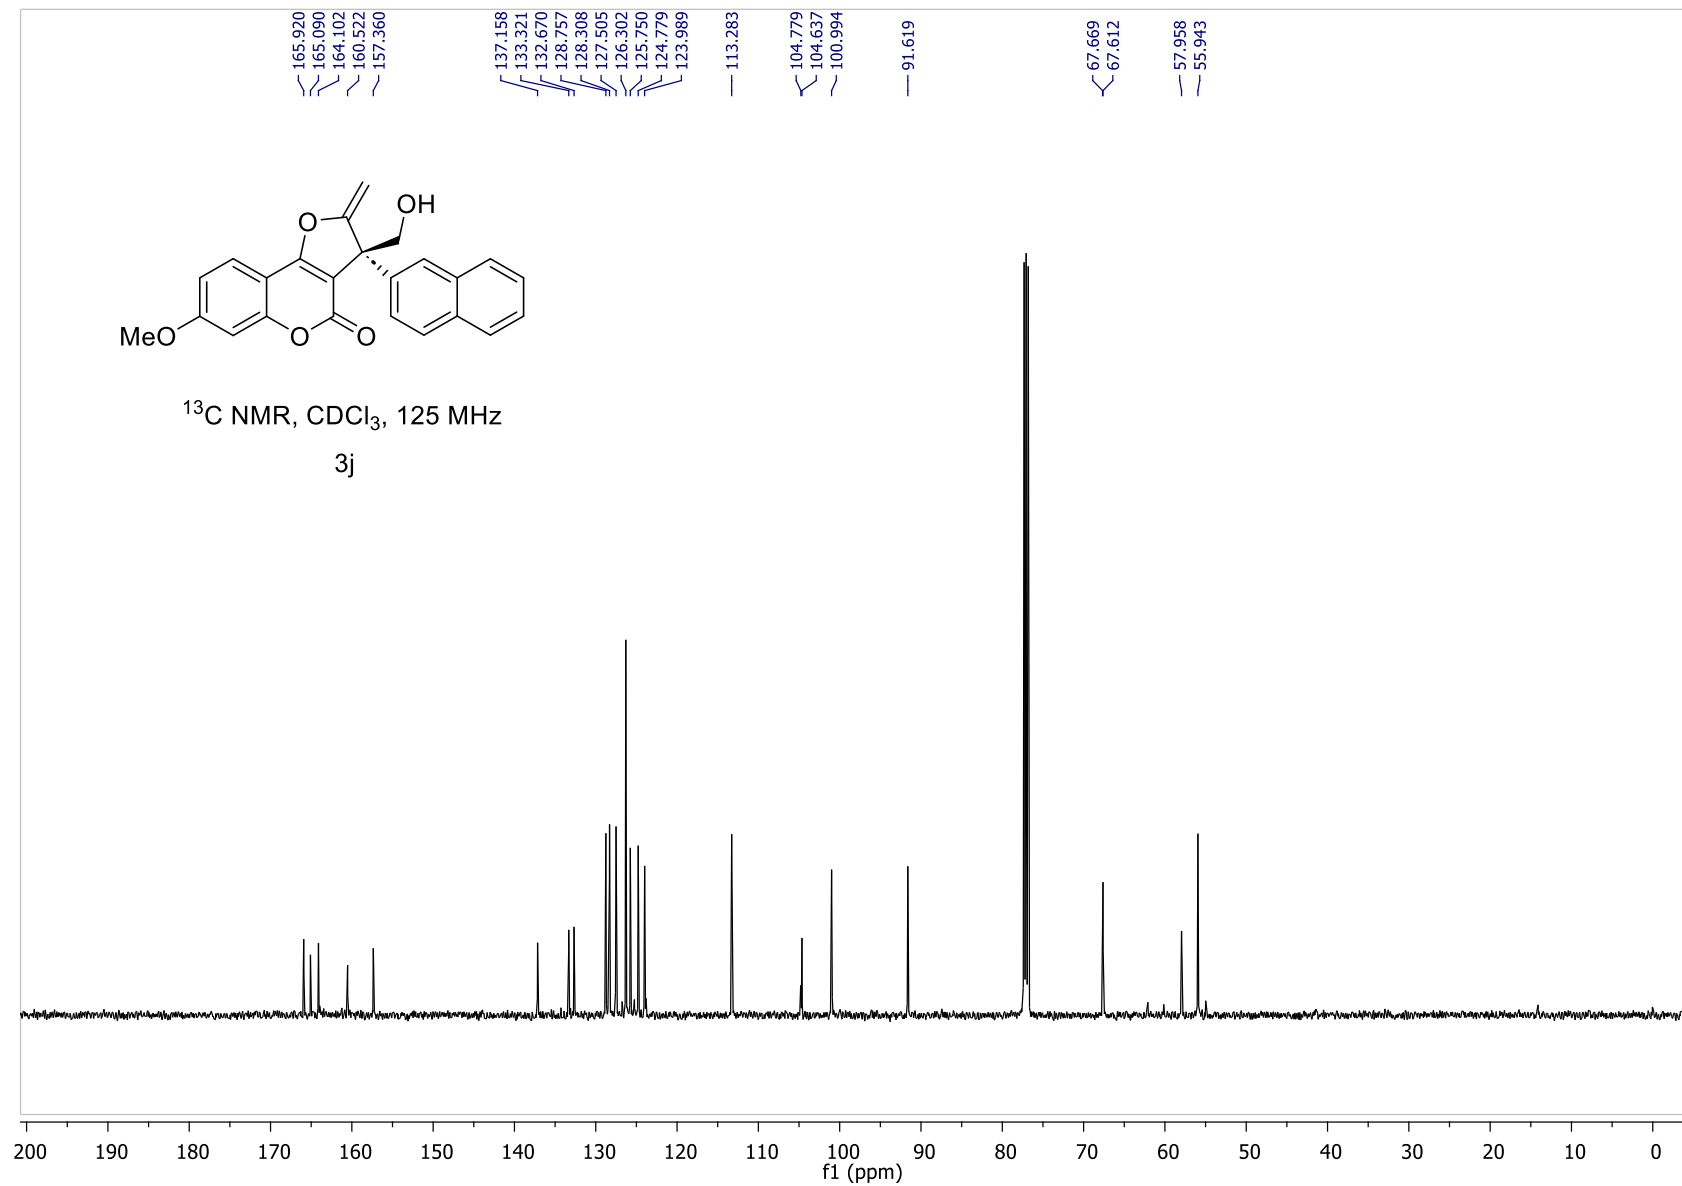

**(R)-3-(hydroxymethyl)-9-methoxy-2-methylene-3-phenyl-2,3-dihydro-4H-furo[3,2-c]chromen-4-one (3k)**

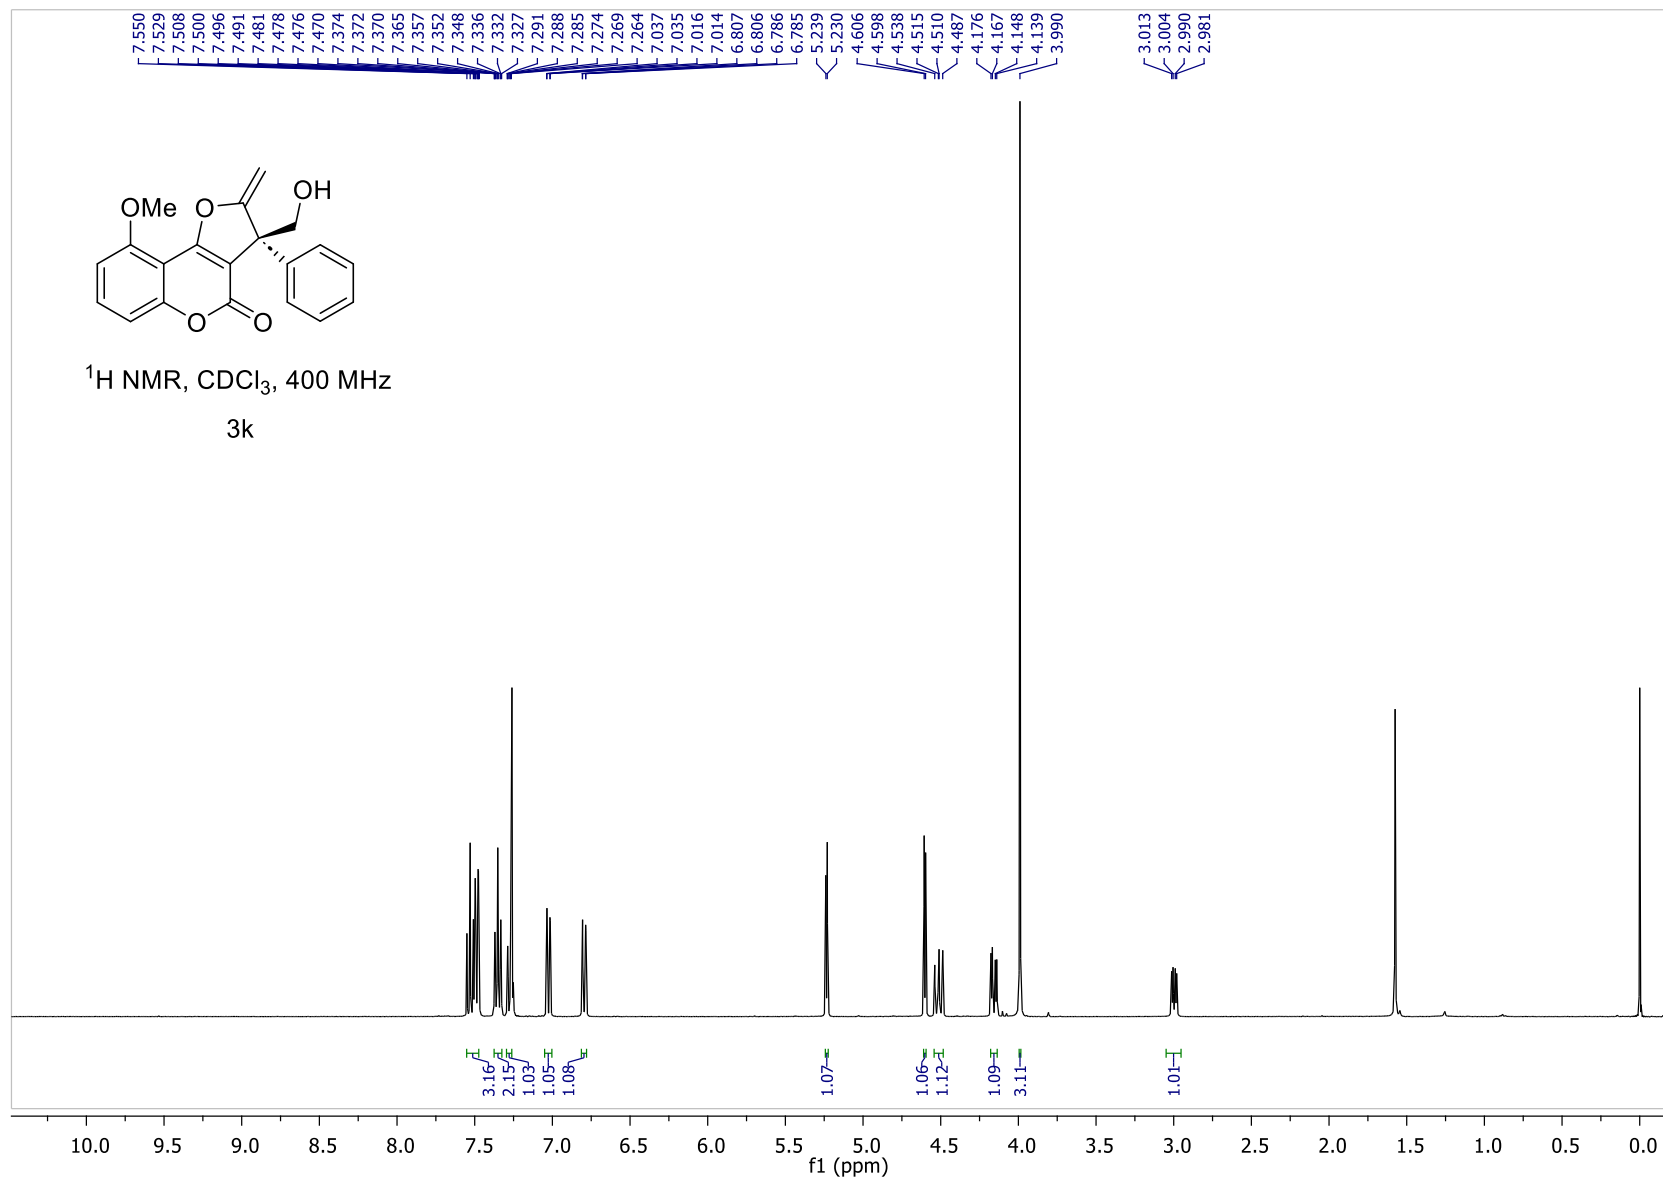

**(R)-3-(hydroxymethyl)-9-methoxy-2-methylene-3-phenyl-2,3-dihydro-4H-furo[3,2-c]chromen-4-one (3k)**

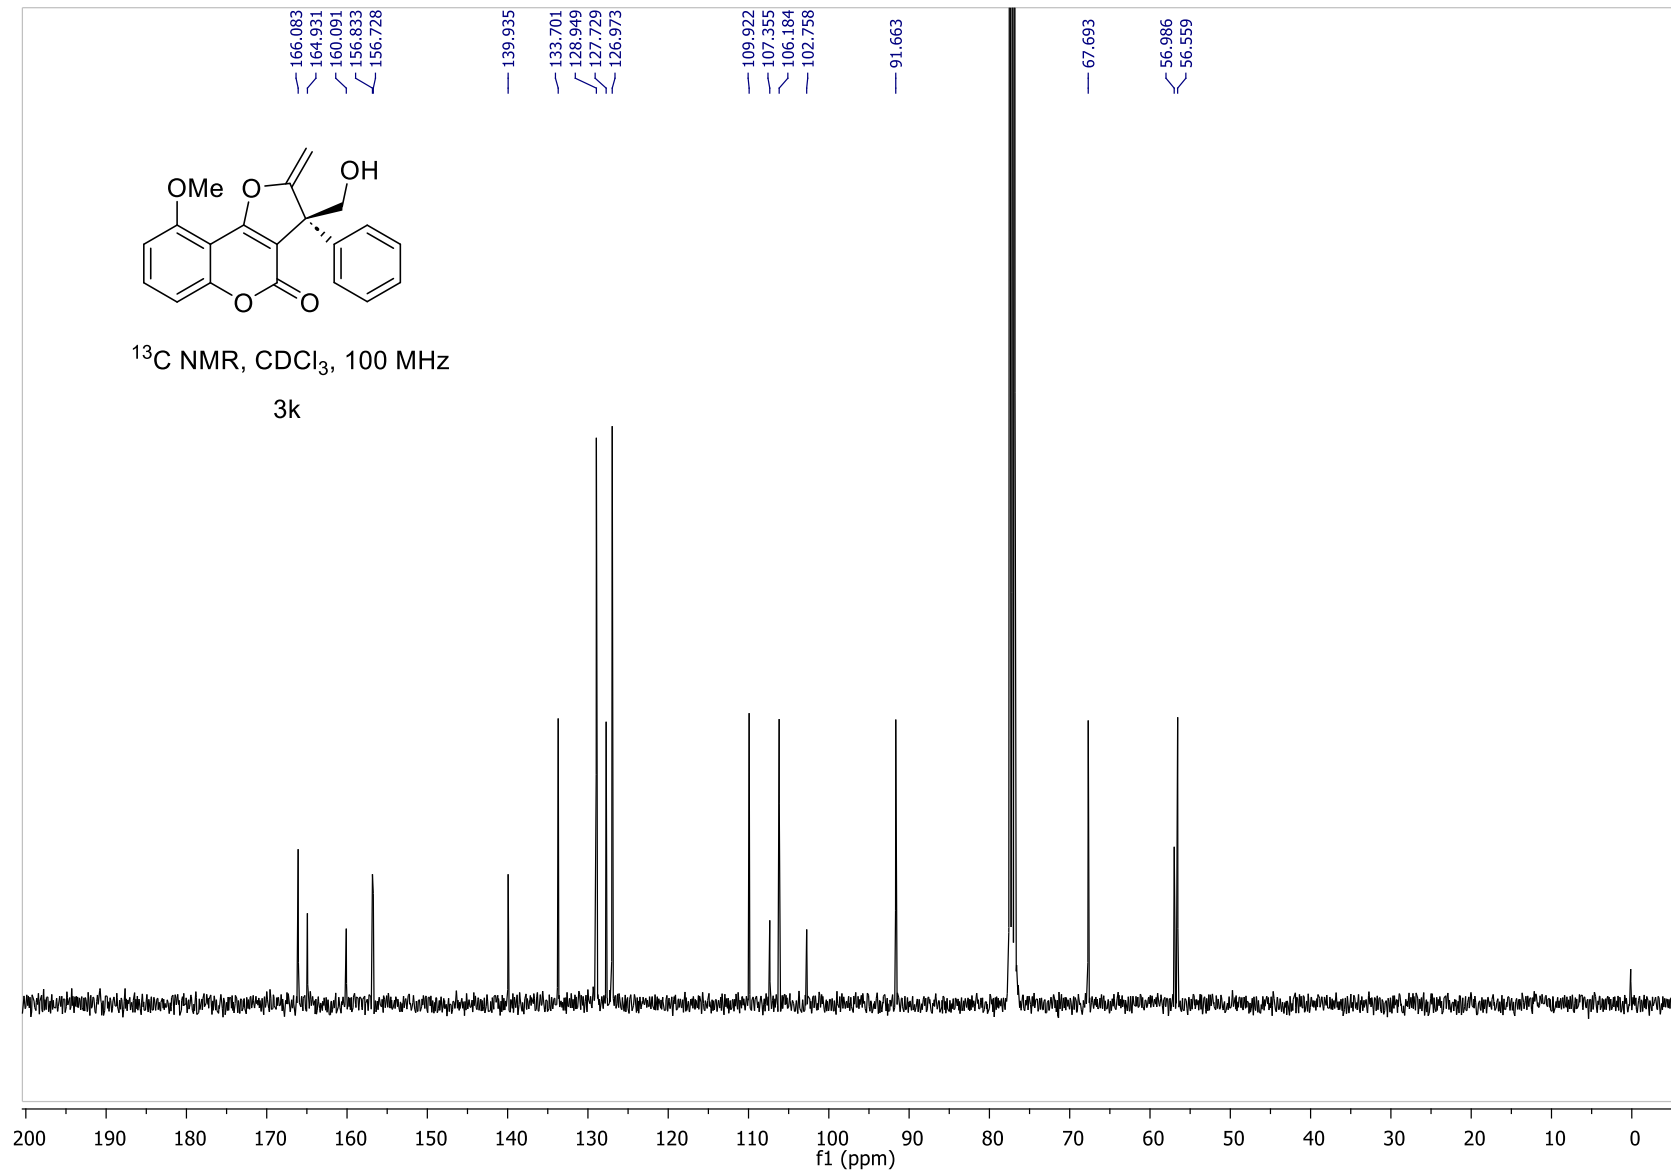

**(R)-3-([1,1'-Biphenyl]-4-yl)-3-(hydroxymethyl)-2-methylene-2,3-dihydro-4H-furo[3,2-c]chromen-4-one (3l)**

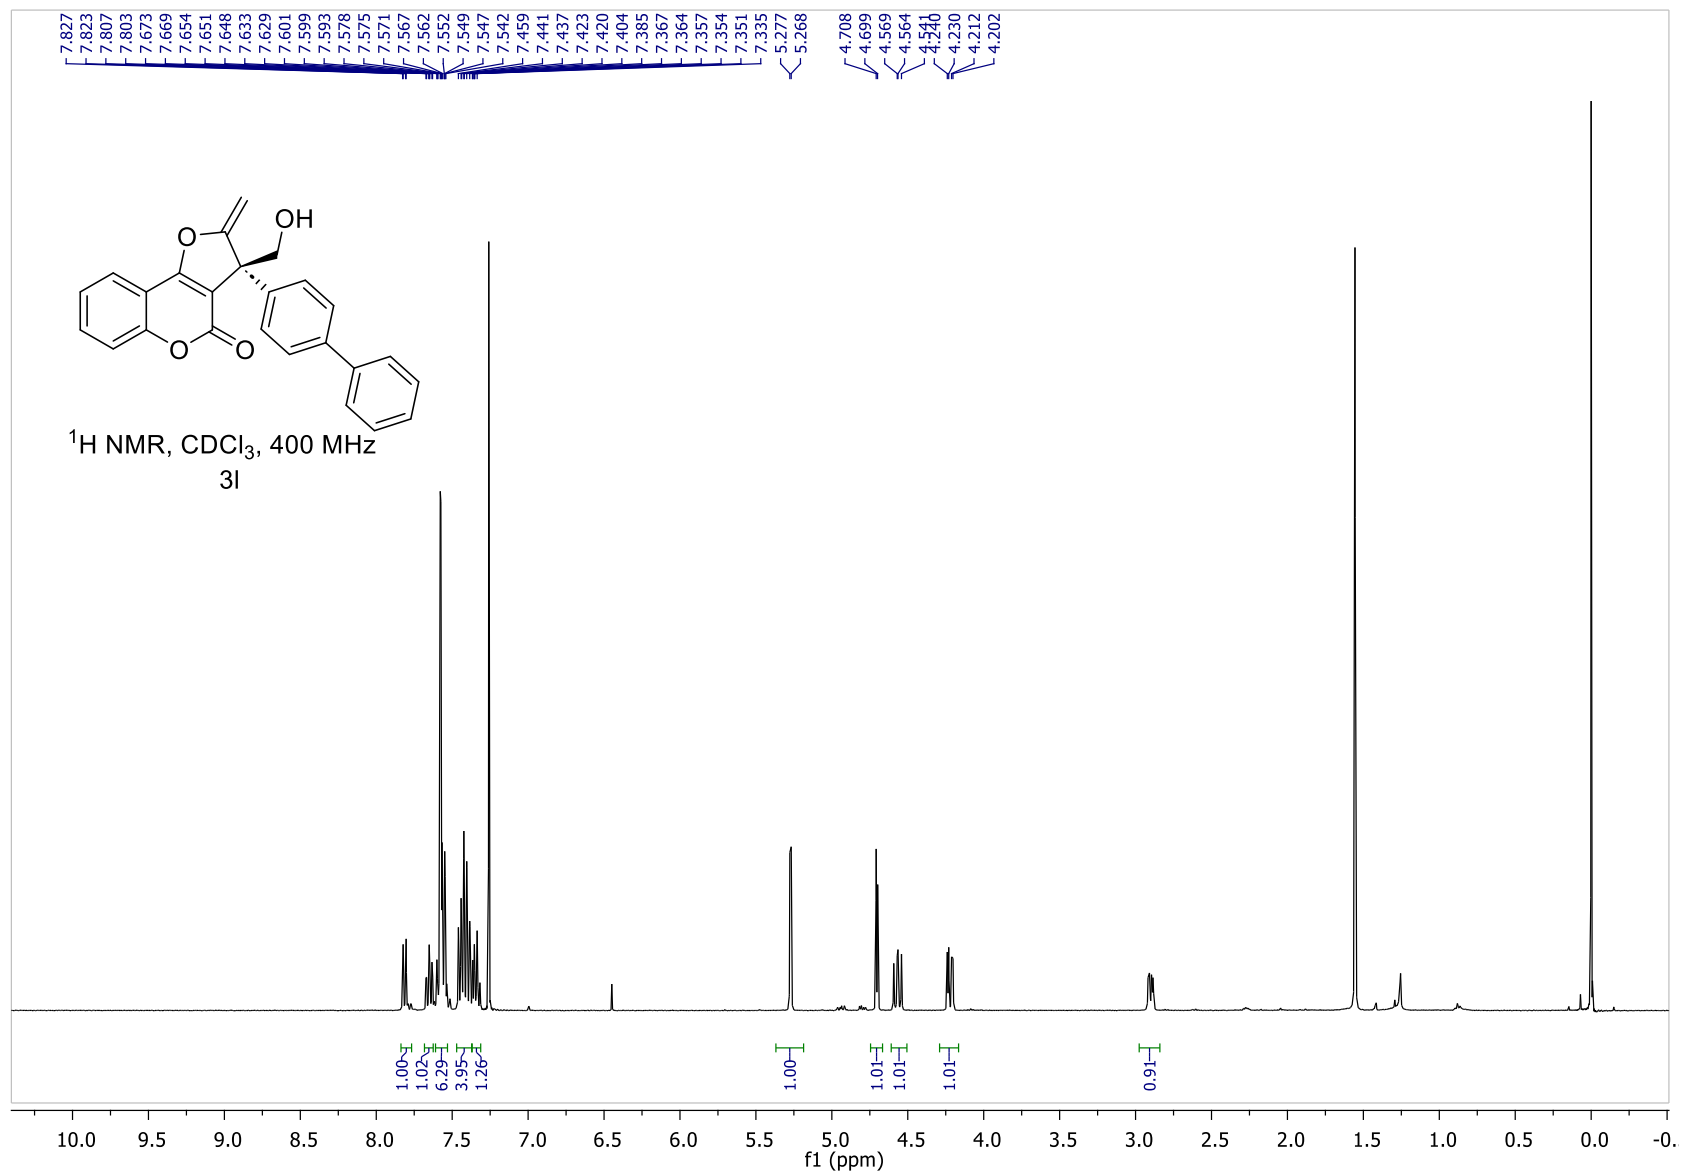



**(R)-3-([1,1'-Biphenyl]-4-yl)-3-(hydroxymethyl)-2-methylene-2,3-dihydro-4H-furo[3,2-c]chromen-4-one (3I)**

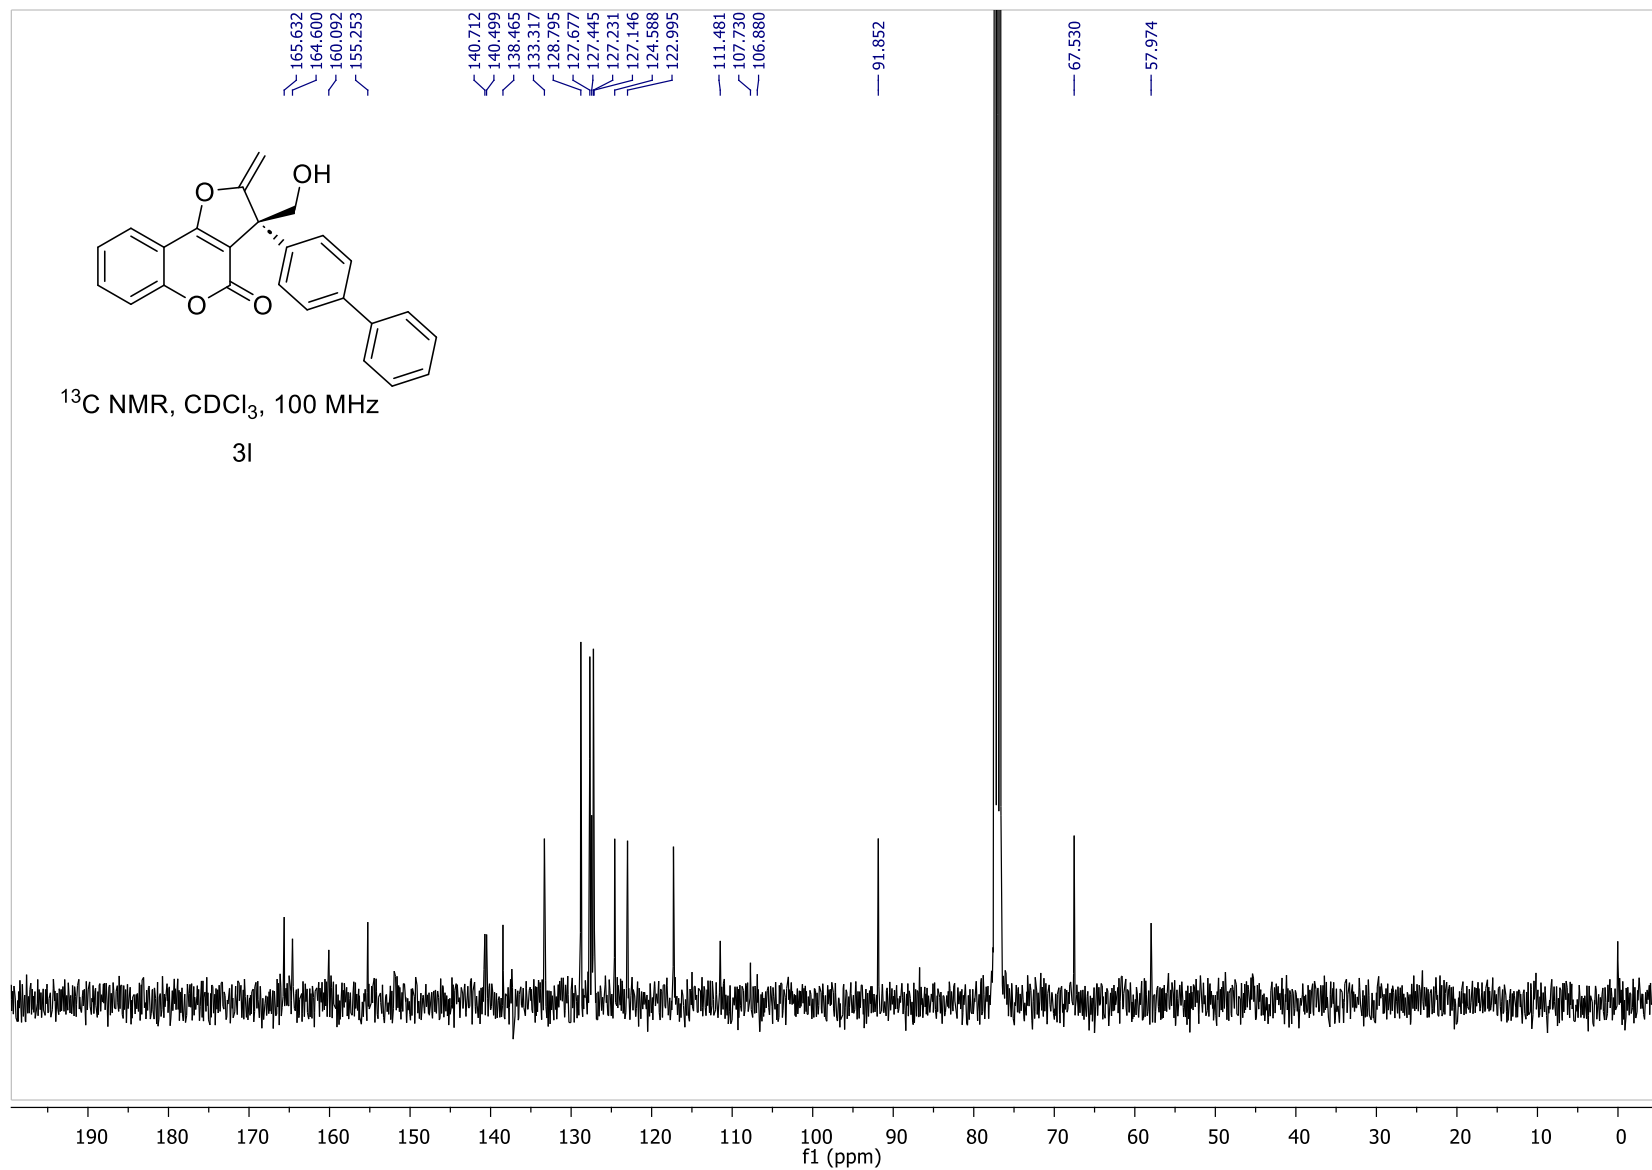

**(R)-3-(hydroxymethyl)-3-(2-methoxyphenyl)-2-methylene-2,3-dihydro-4H-furo[3,2-c]chromen-4-one (3m)**

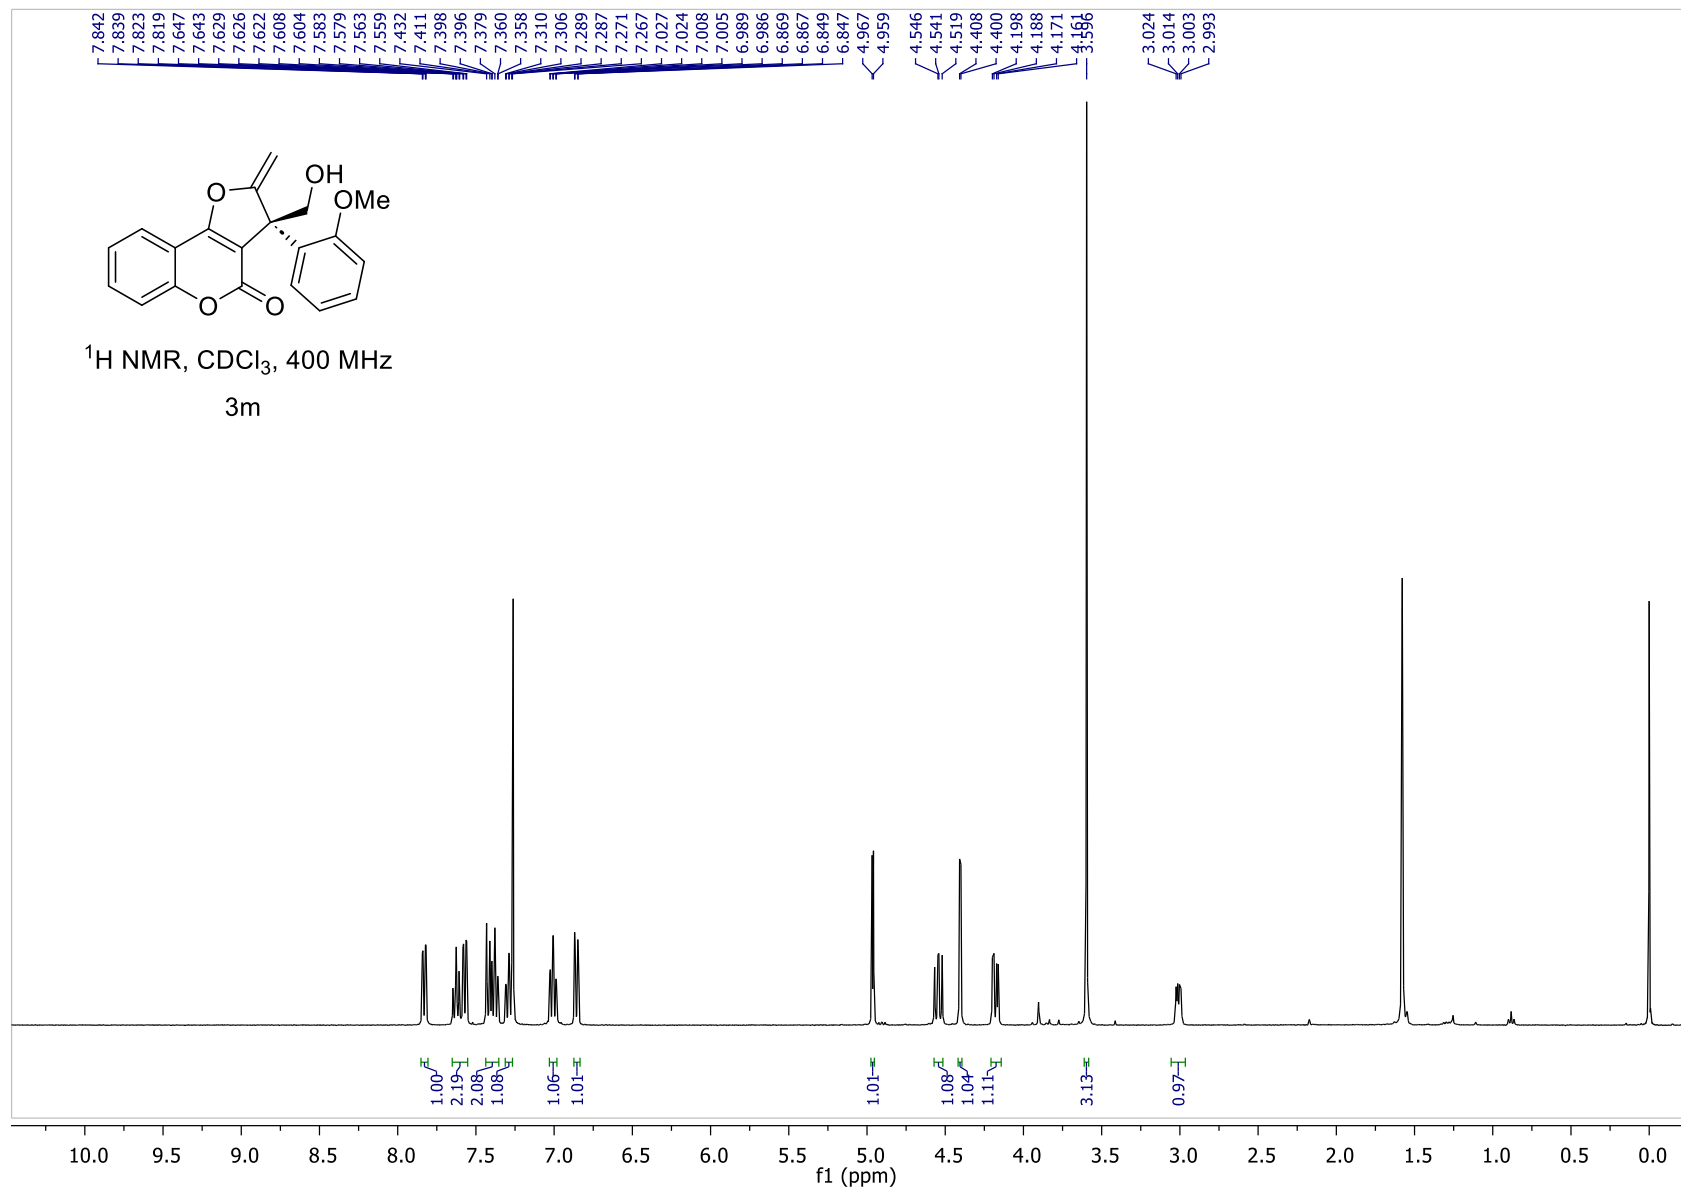

**(R)-3-(hydroxymethyl)-3-(2-methoxyphenyl)-2-methylene-2,3-dihydro-4H-furo[3,2-c]chromen-4-one (3m)**

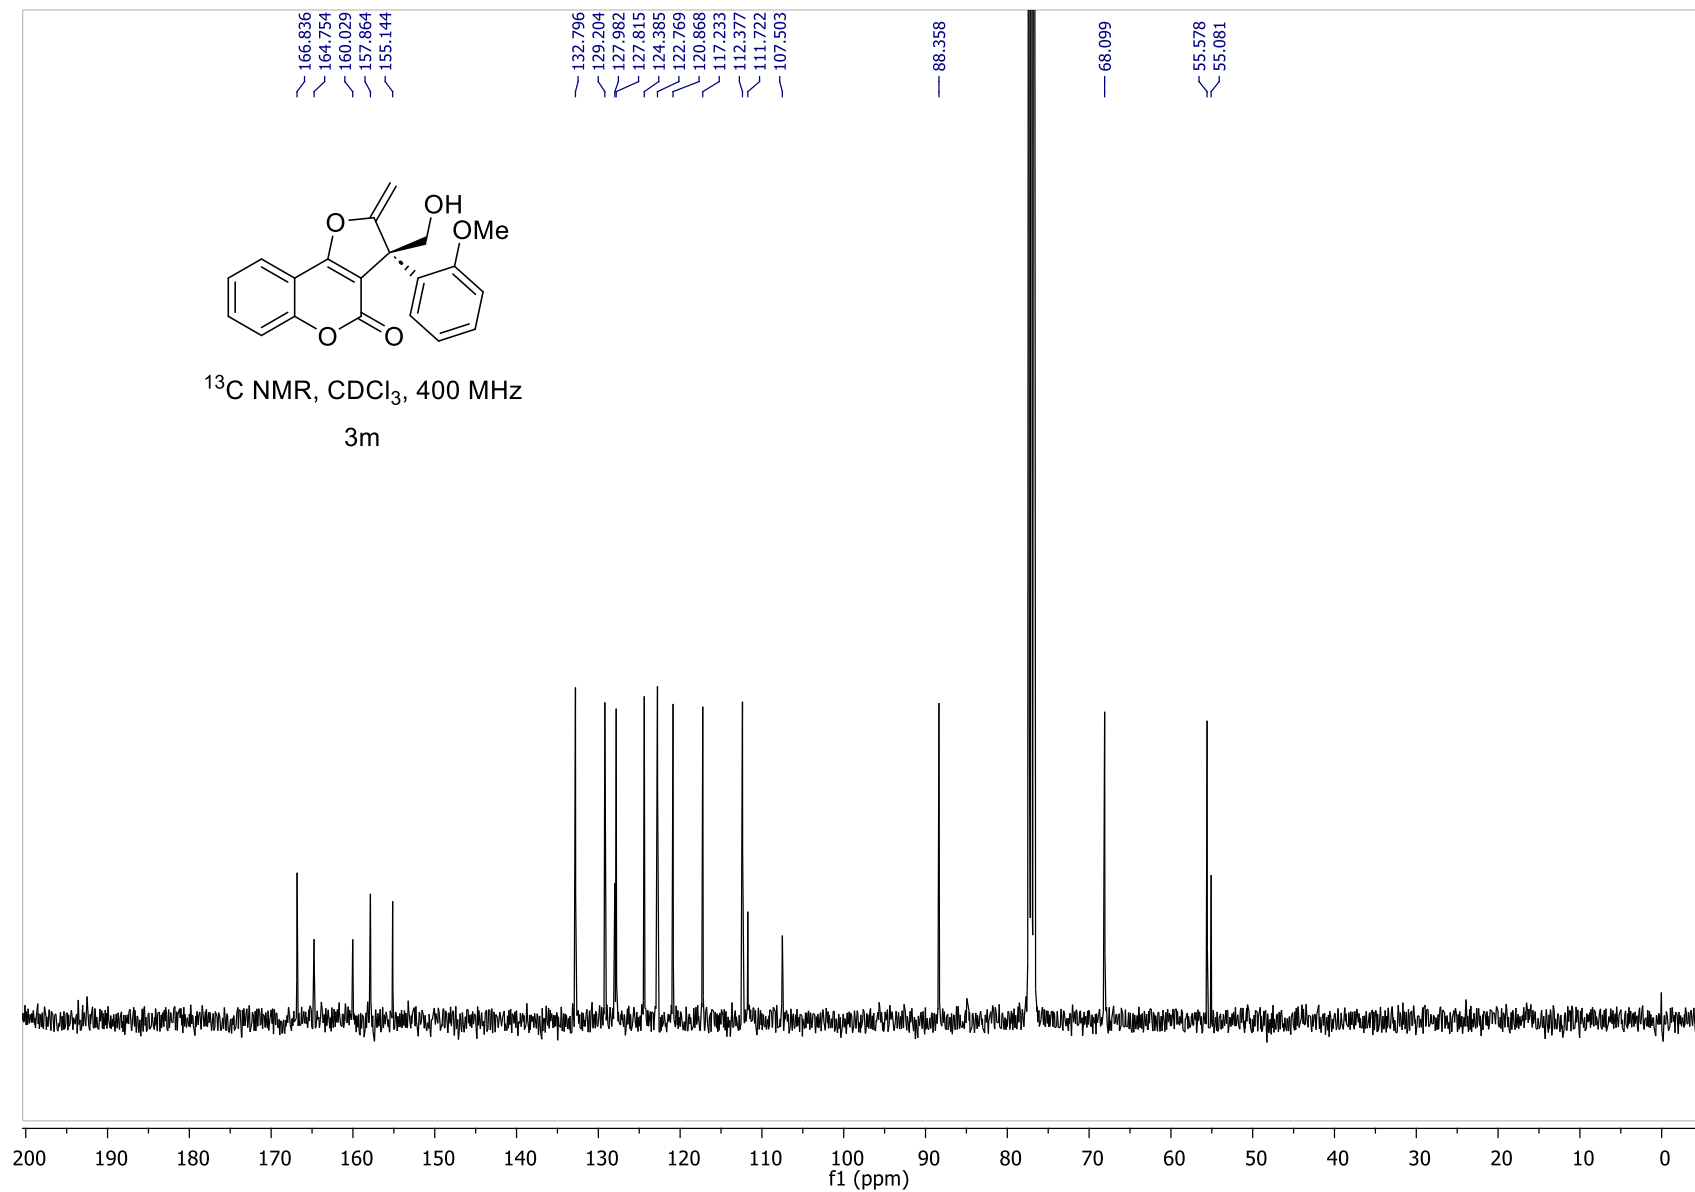

**(R)-3-(Hydroxymethyl)-3-(3-methoxyphenyl)-2-methylene-2,3-dihydro-4H-furo[3,2-c]chromen-4-one (3n)**

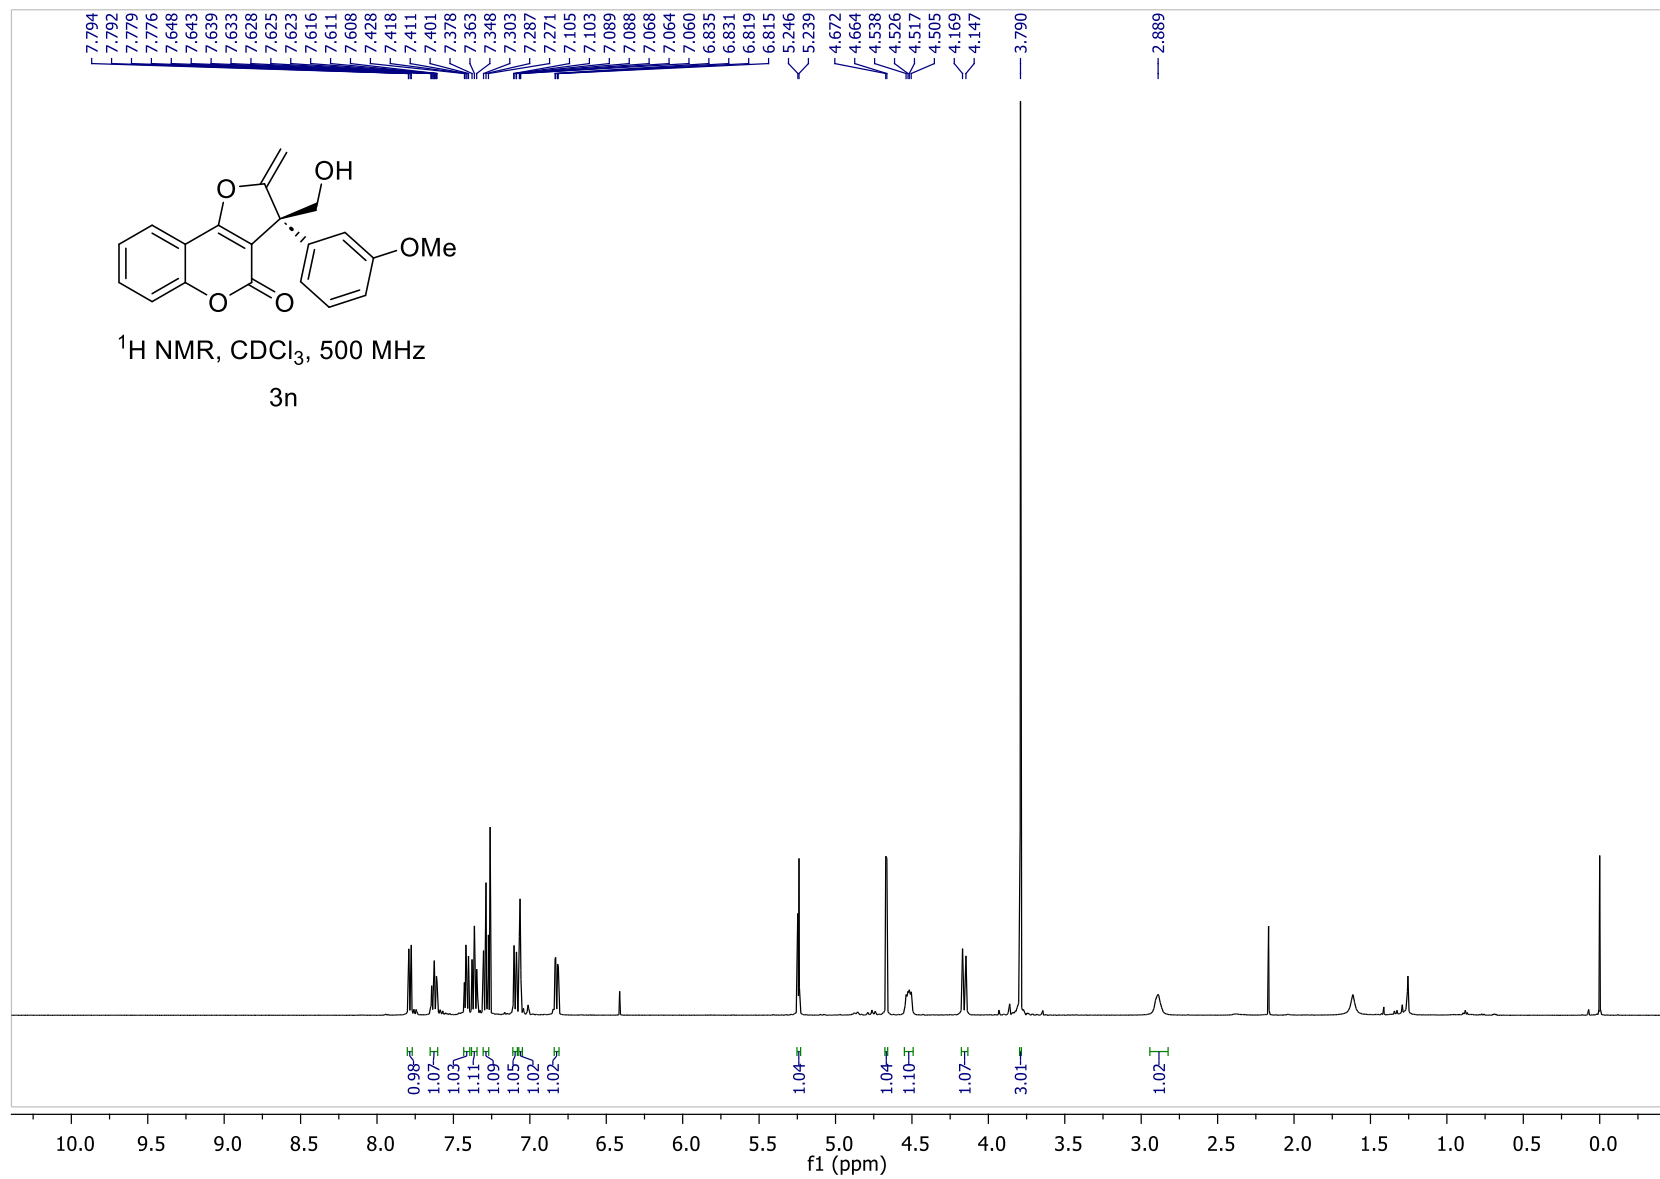

**(R)-3-(Hydroxymethyl)-3-(3-methoxyphenyl)-2-methylene-2,3-dihydro-4H-furo[3,2-c]chromen-4-one (3n)**

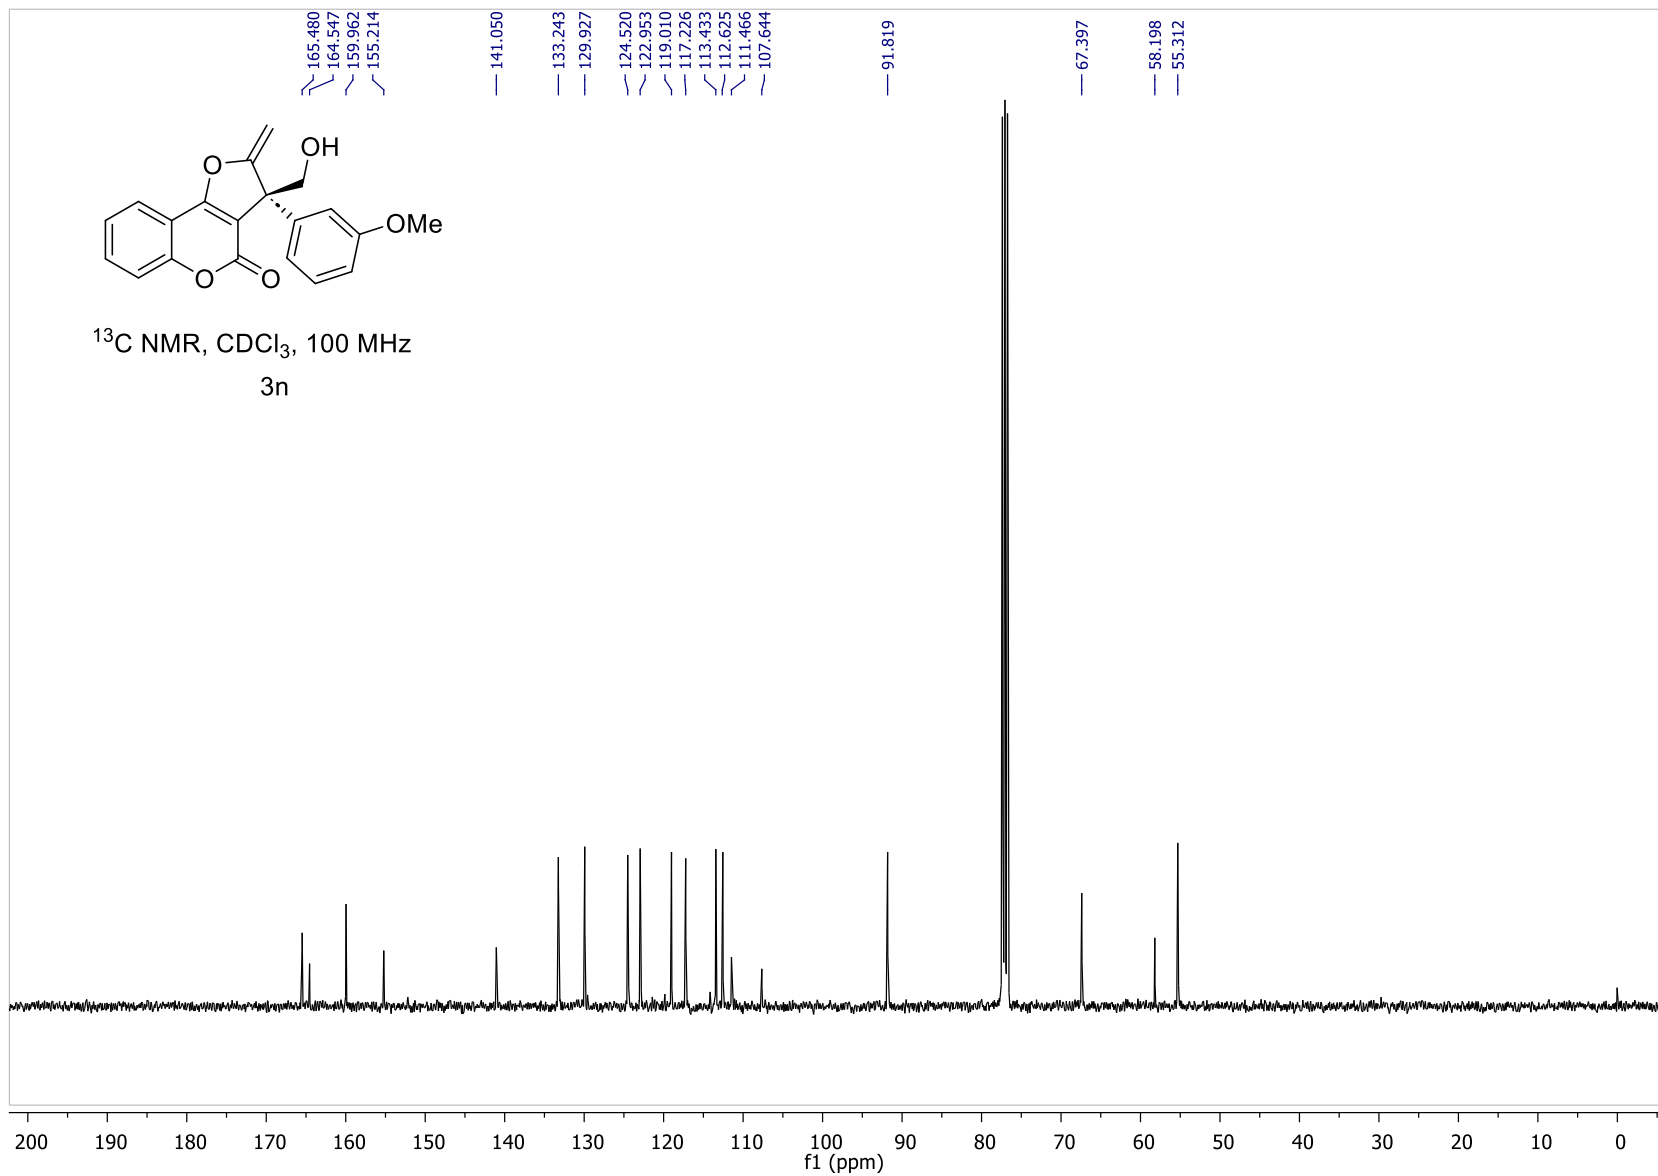

**(R)-3-(Hydroxymethyl)-2-methylene-3-(p-tolyl)-2,3-dihydro-4H-furo[3,2-c]chromen-4-one (3o)**

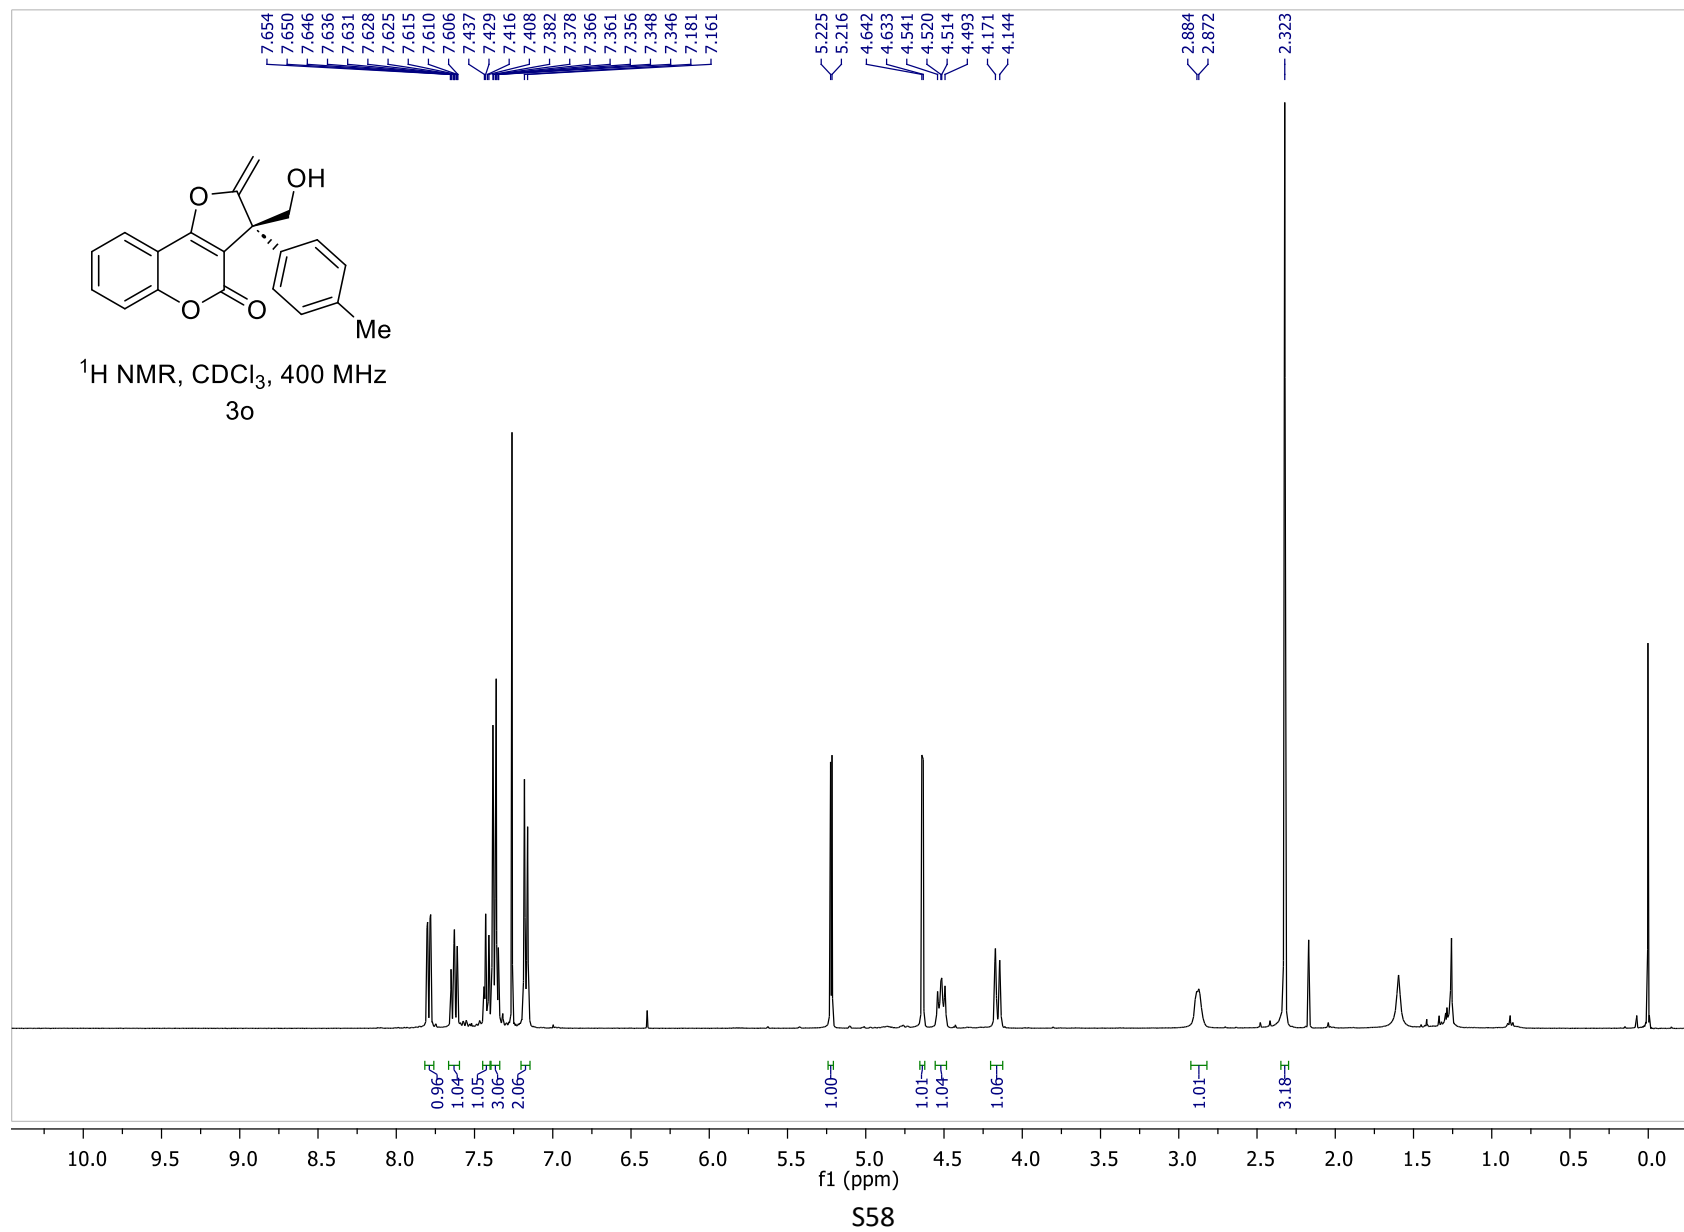

**(R)-3-(Hydroxymethyl)-2-methylene-3-(p-tolyl)-2,3-dihydro-4H-furo[3,2-c]chromen-4-one (3o)**

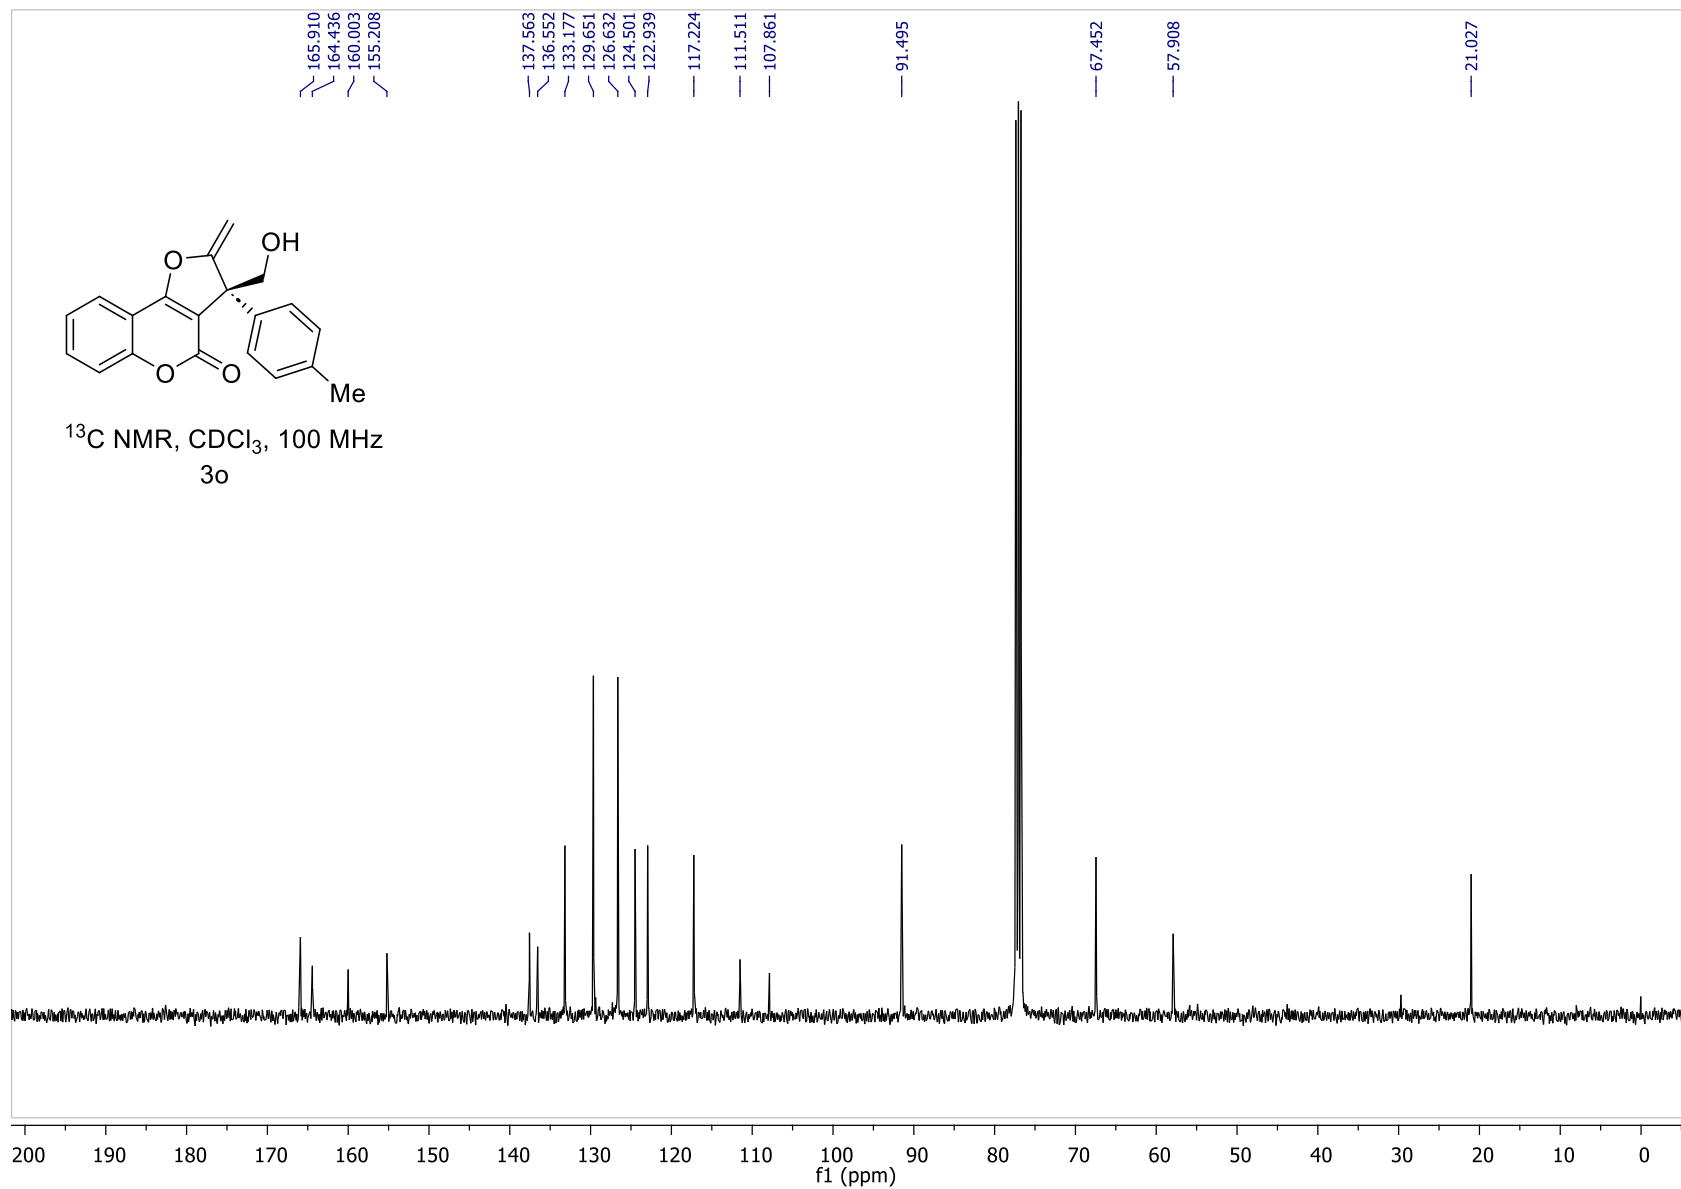

**(R)-3-(4-Chlorophenyl)-3-(hydroxymethyl)-2-methylene-2,3-dihydro-4H-furo[3,2-c]chromen-4-one (3p)**

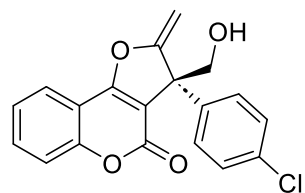

$^1\text{H NMR}$ ,  $\text{CDCl}_3$ , 400 MHz  
3p

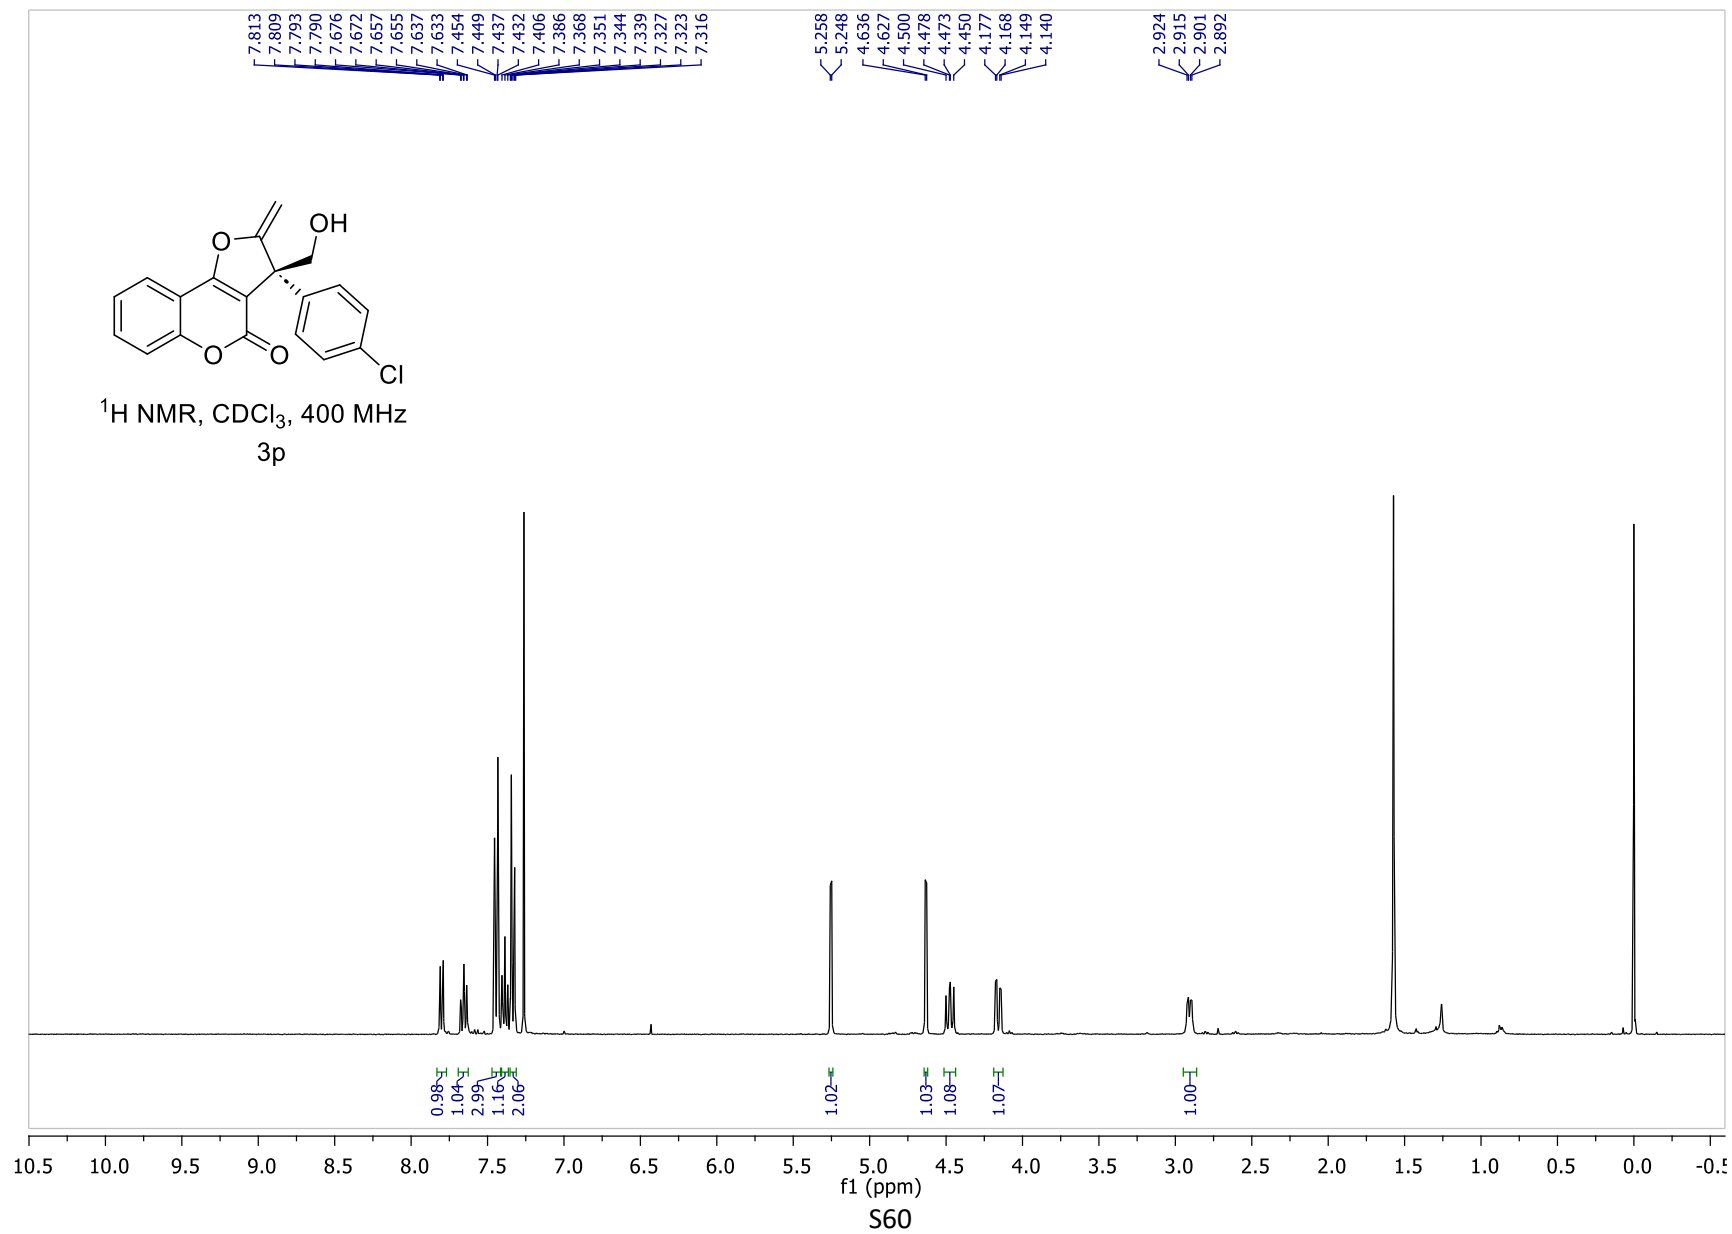



**(R)-3-(4-Chlorophenyl)-3-(hydroxymethyl)-2-methylene-2,3-dihydro-4H-furo[3,2-c]chromen-4-one (3p)**

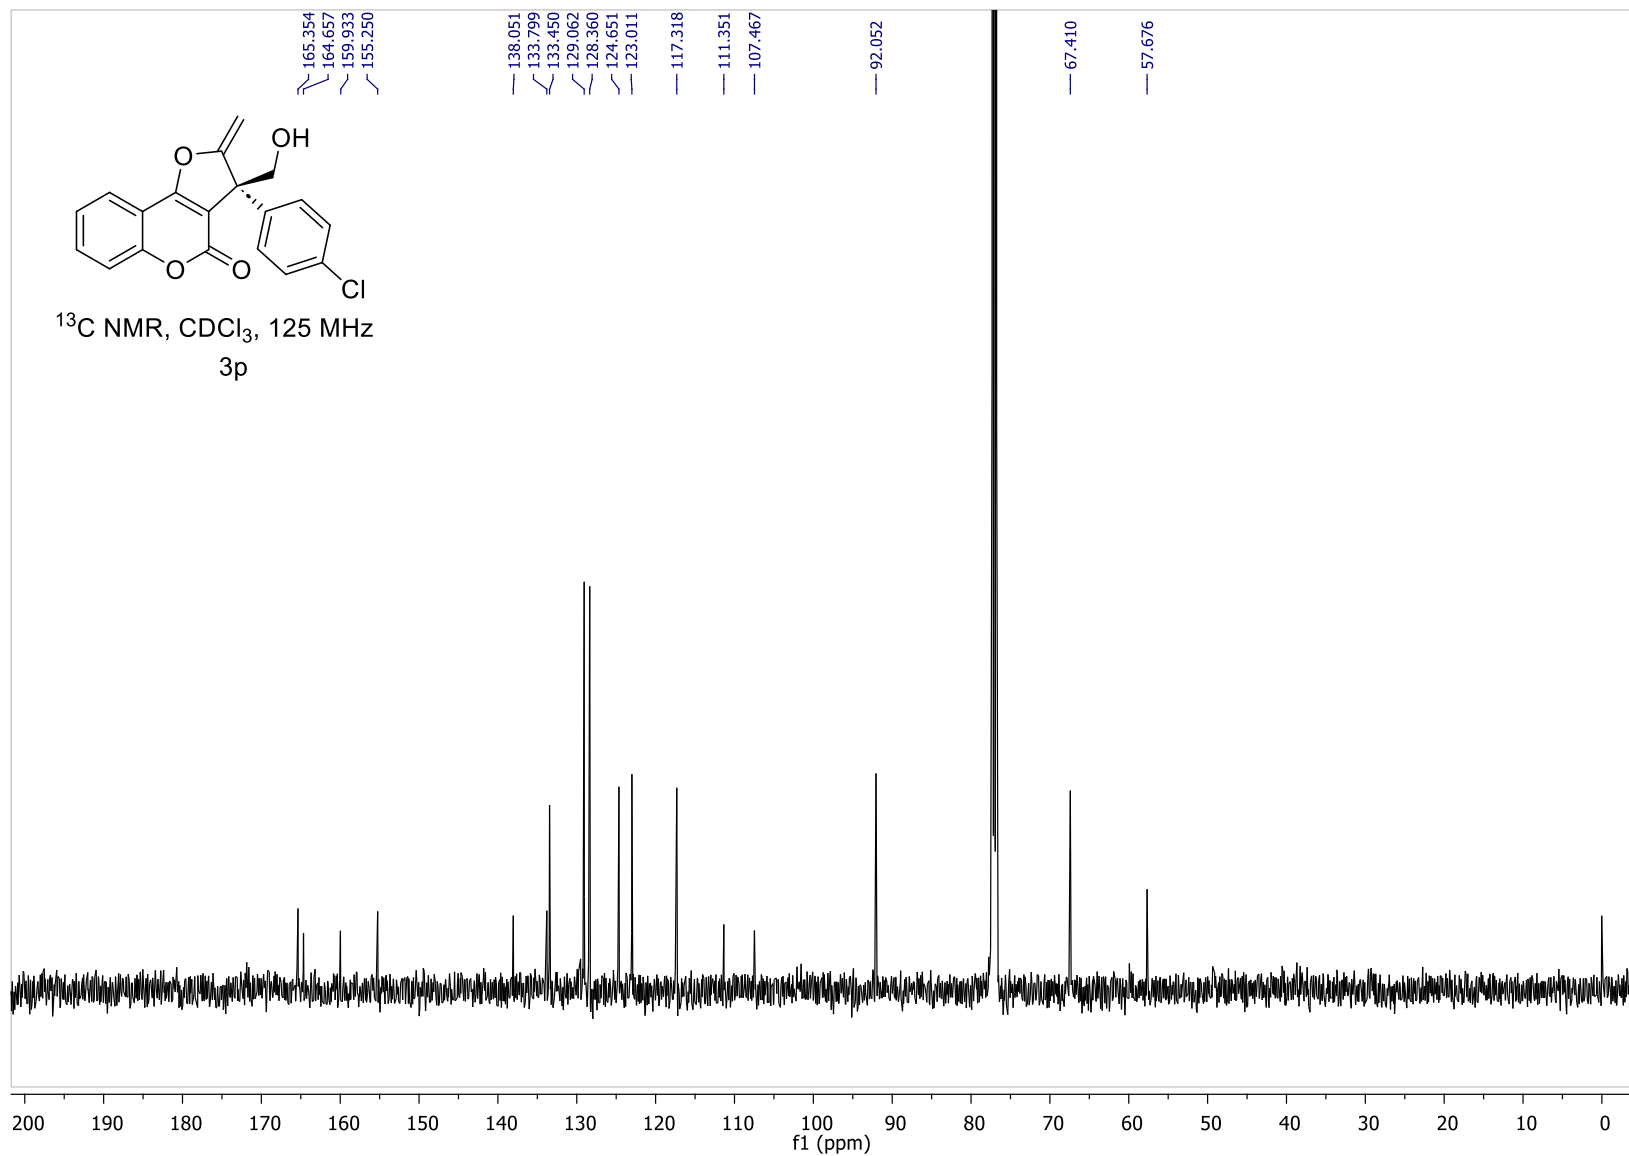

**(R)-3-(4-Bromophenyl)-3-(hydroxymethyl)-2-methylene-2,3-dihydro-4H-furo[3,2-c]chromen-4-one (3q)**

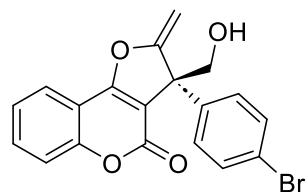

<sup>1</sup>H NMR, CDCl<sub>3</sub>, 400 MHz  
3q

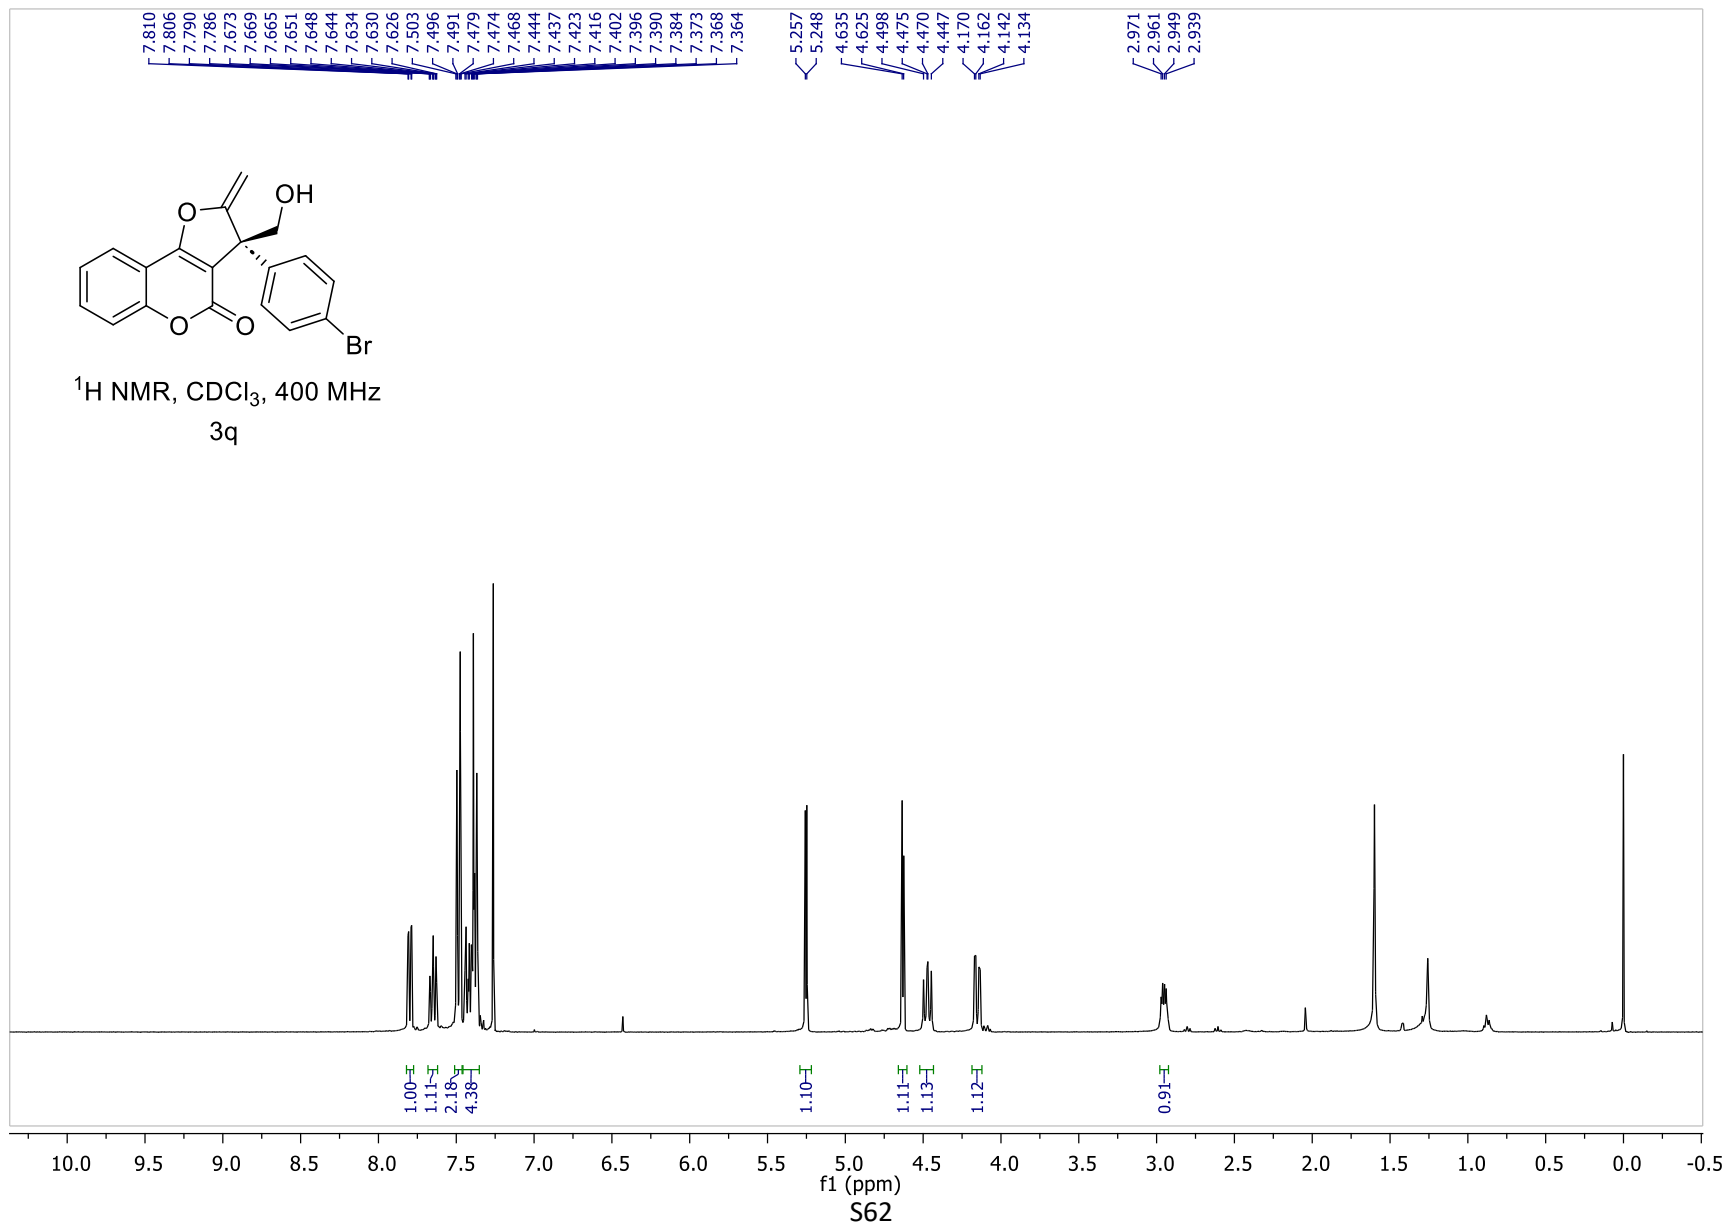

**(R)-3-(4-Bromophenyl)-3-(hydroxymethyl)-2-methylene-2,3-dihydro-4H-furo[3,2-c]chromen-4-one (3q)**

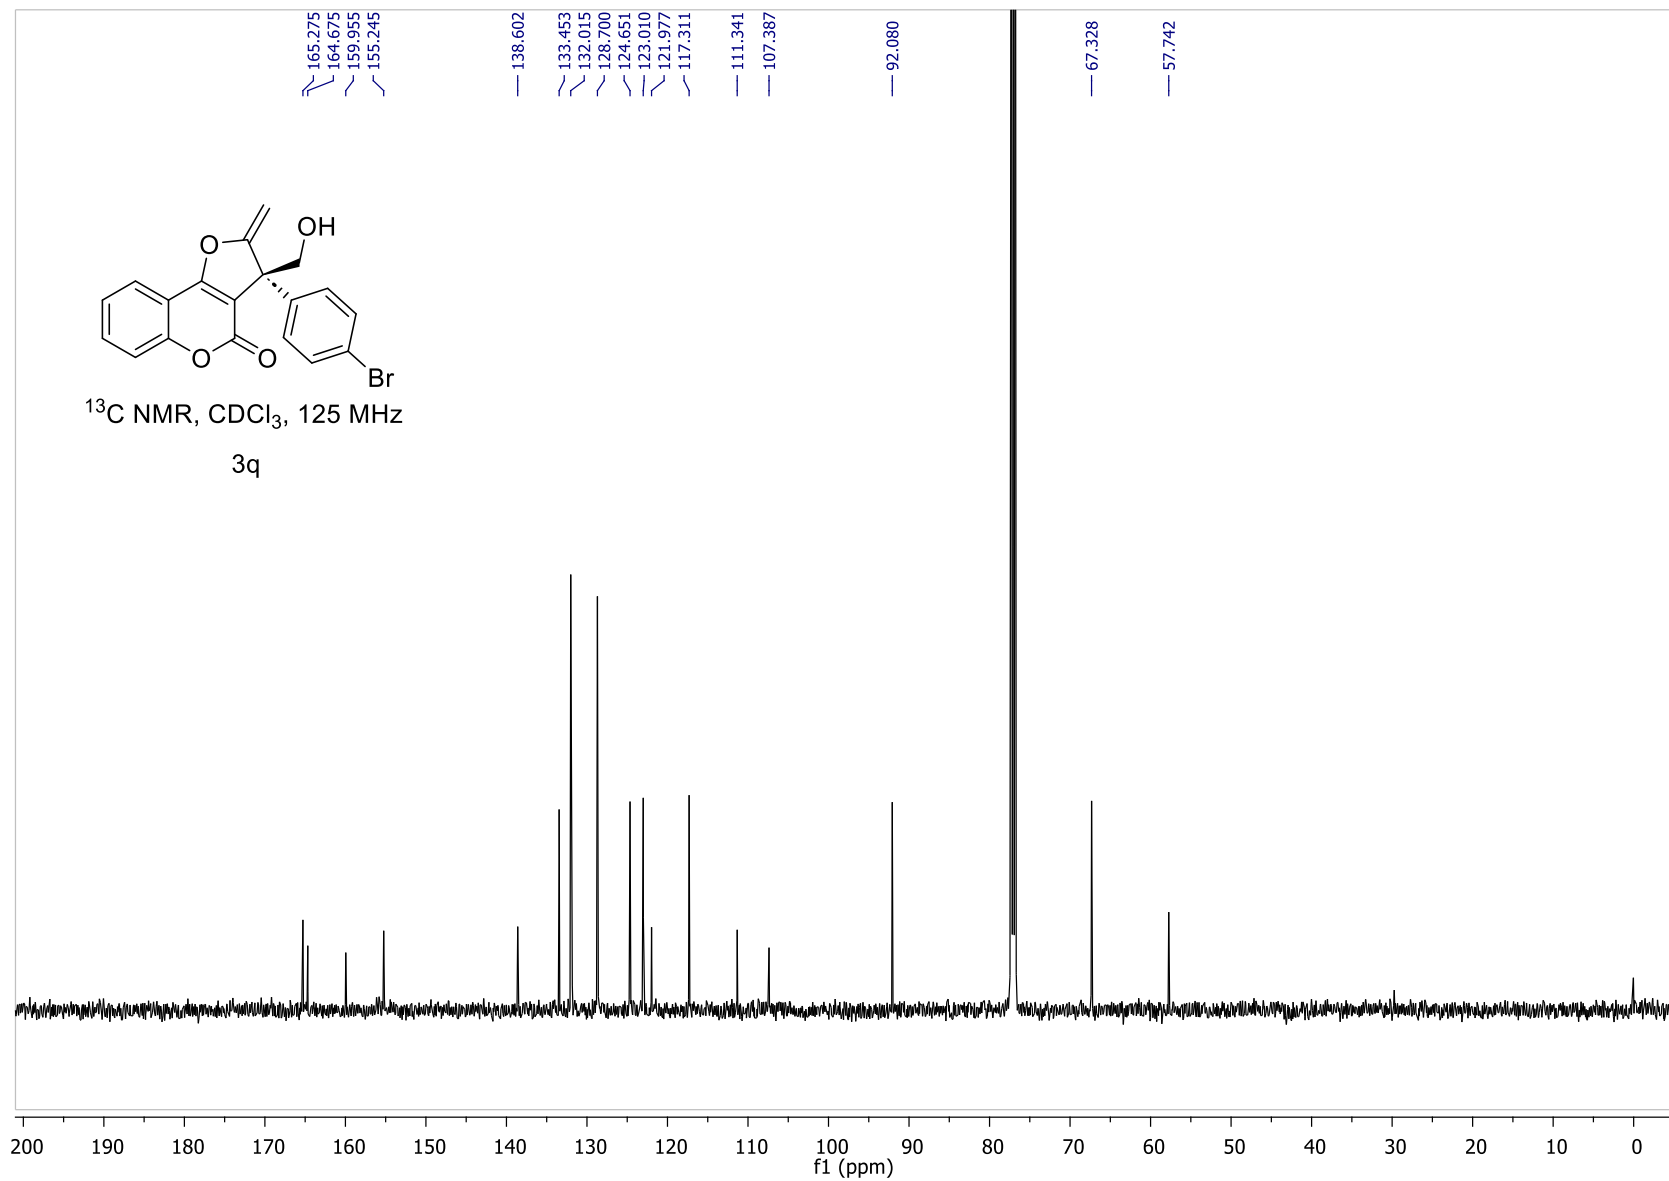

**(R)-3-(3-Chlorophenyl)-3-(hydroxymethyl)-2-methylene-2,3-dihydro-4H-furo[3,2-c]chromen-4-one (3r)**

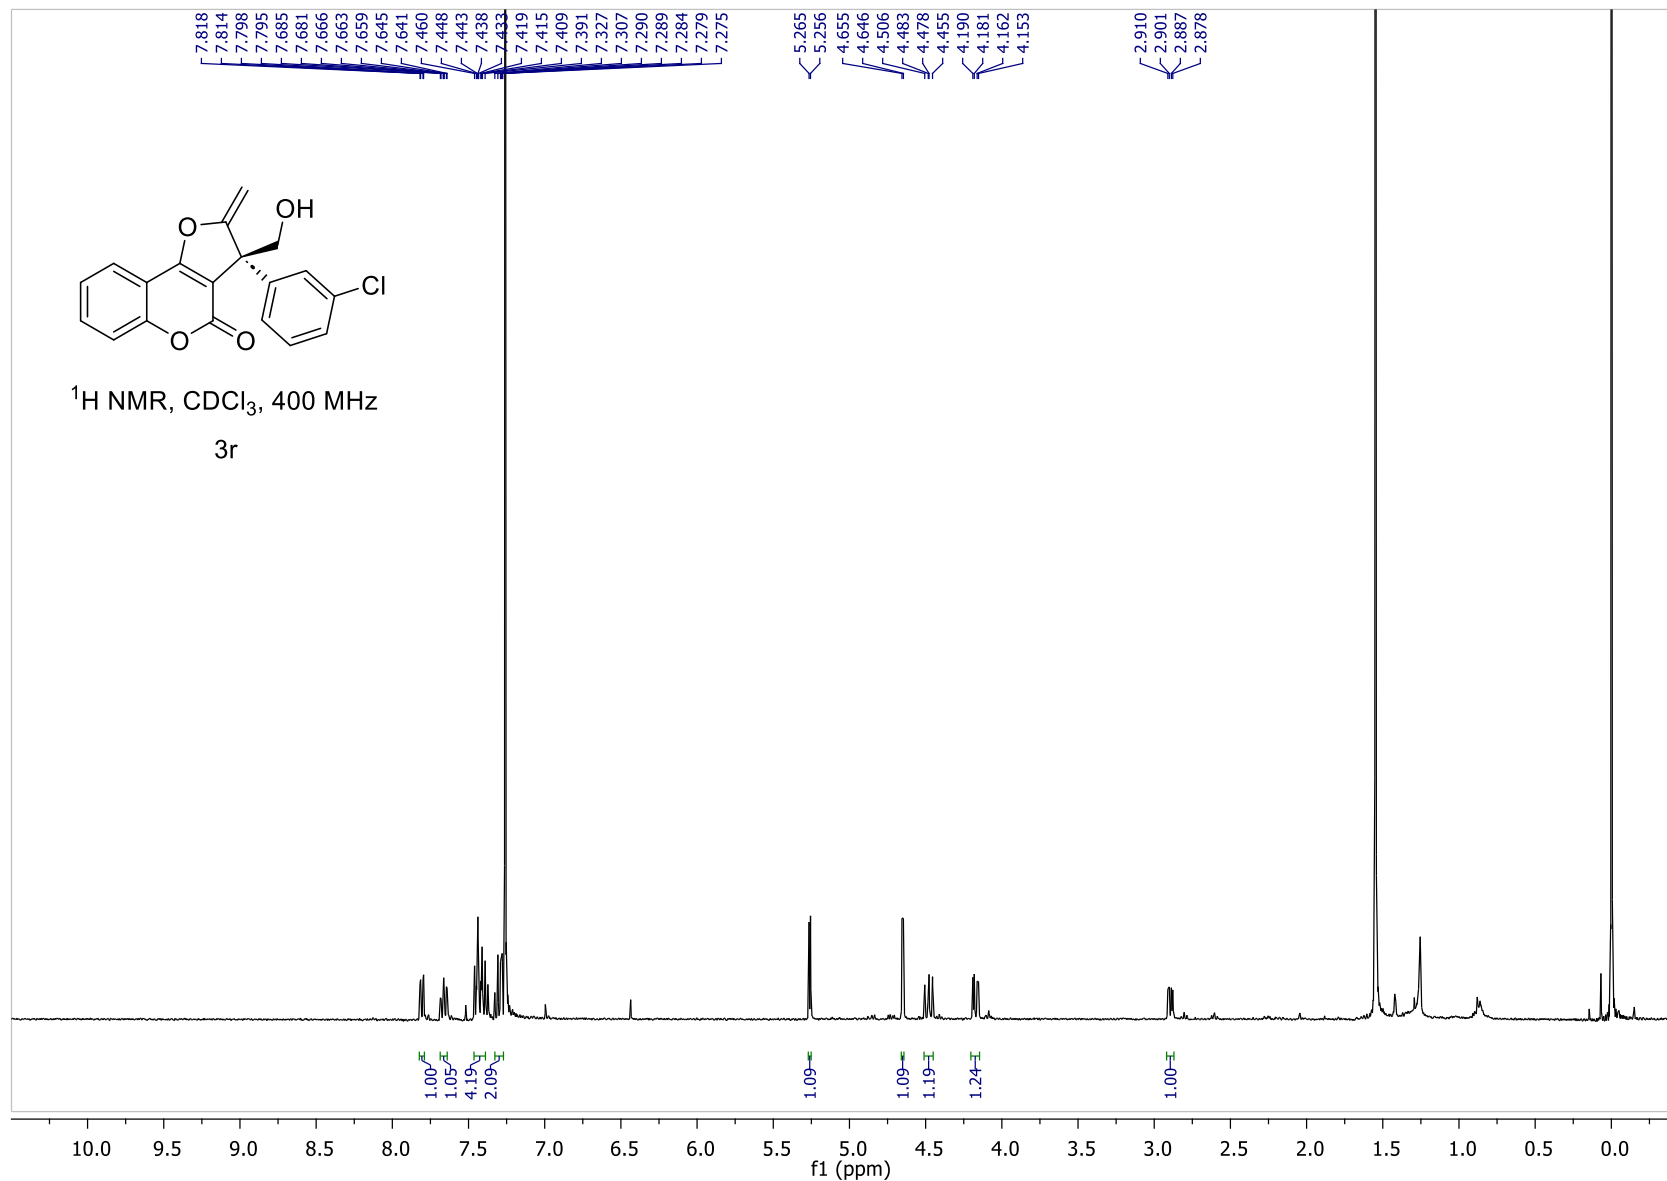

**(R)-3-(3-Chlorophenyl)-3-(hydroxymethyl)-2-methylene-2,3-dihydro-4H-furo[3,2-c]chromen-4-one (3r)**

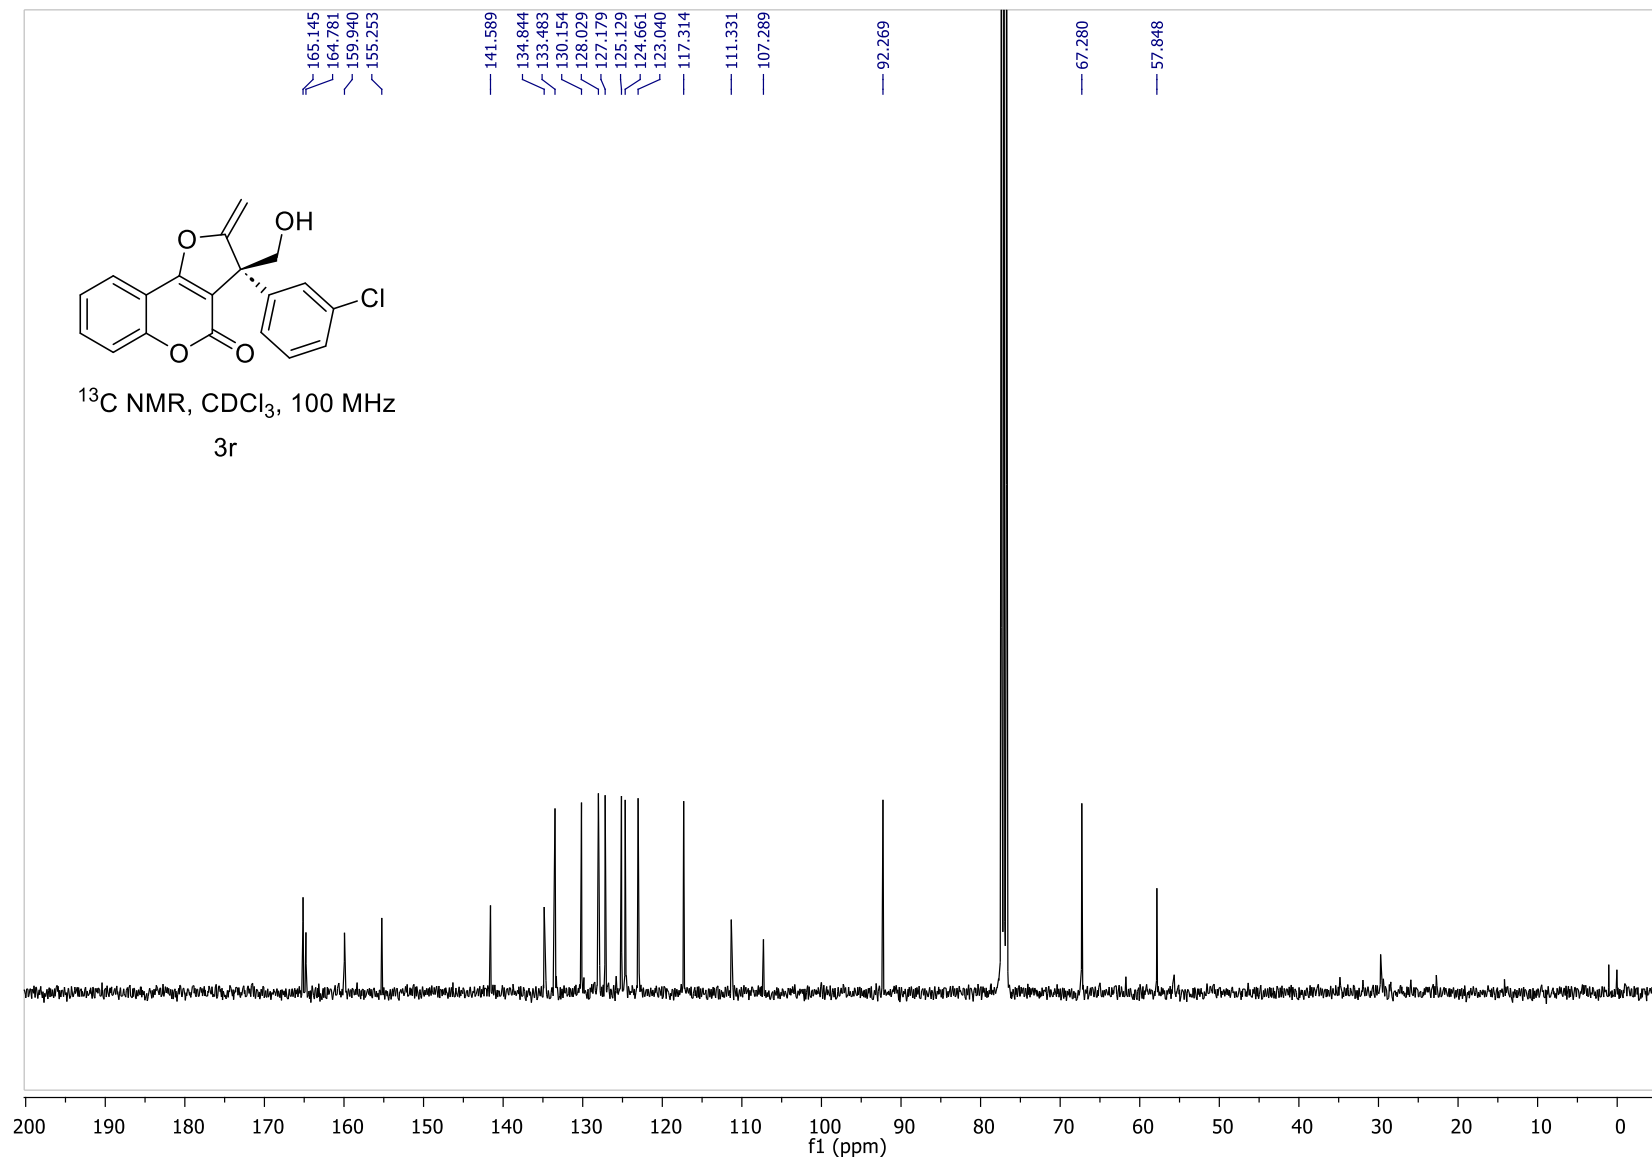

**(R)-3-(4-Fluorophenyl)-3-(hydroxymethyl)-2-methylene-2,3-dihydro-4H-furo[3,2-c]chromen-4-one (3s)**

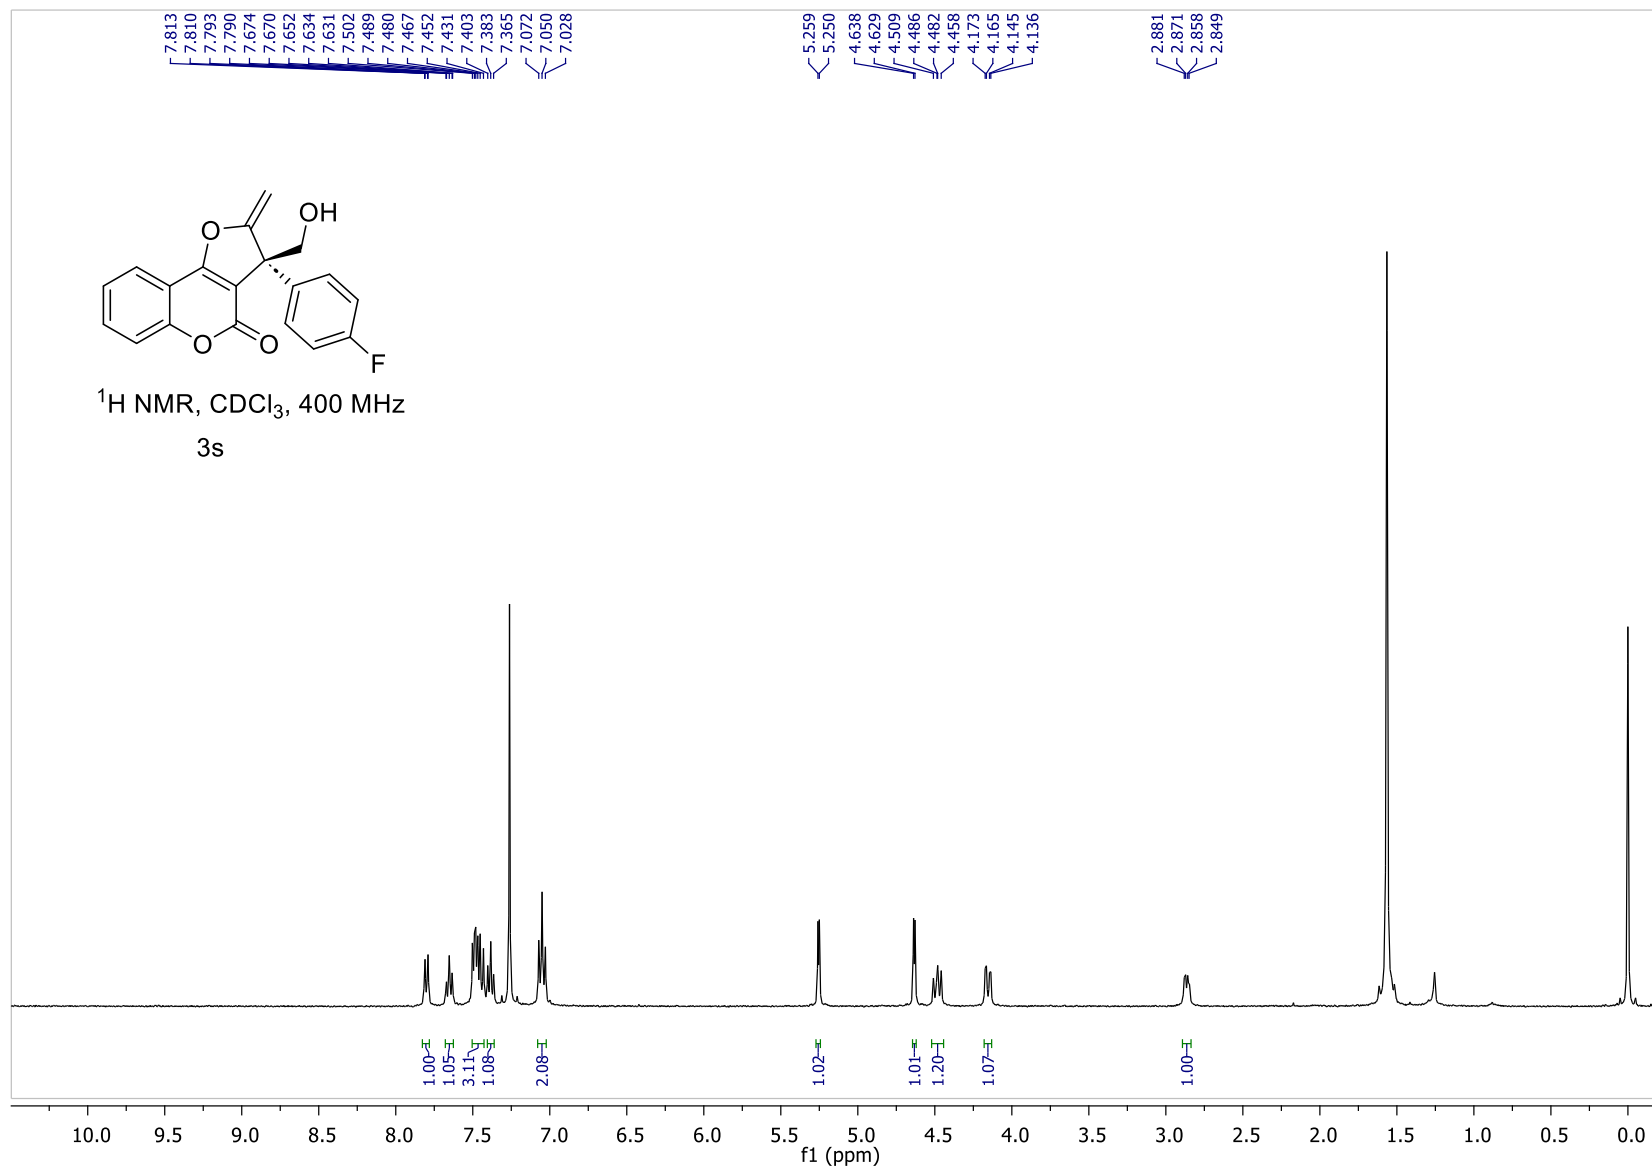

**(R)-3-(4-Fluorophenyl)-3-(hydroxymethyl)-2-methylene-2,3-dihydro-4H-furo[3,2-c]chromen-4-one (3s)**

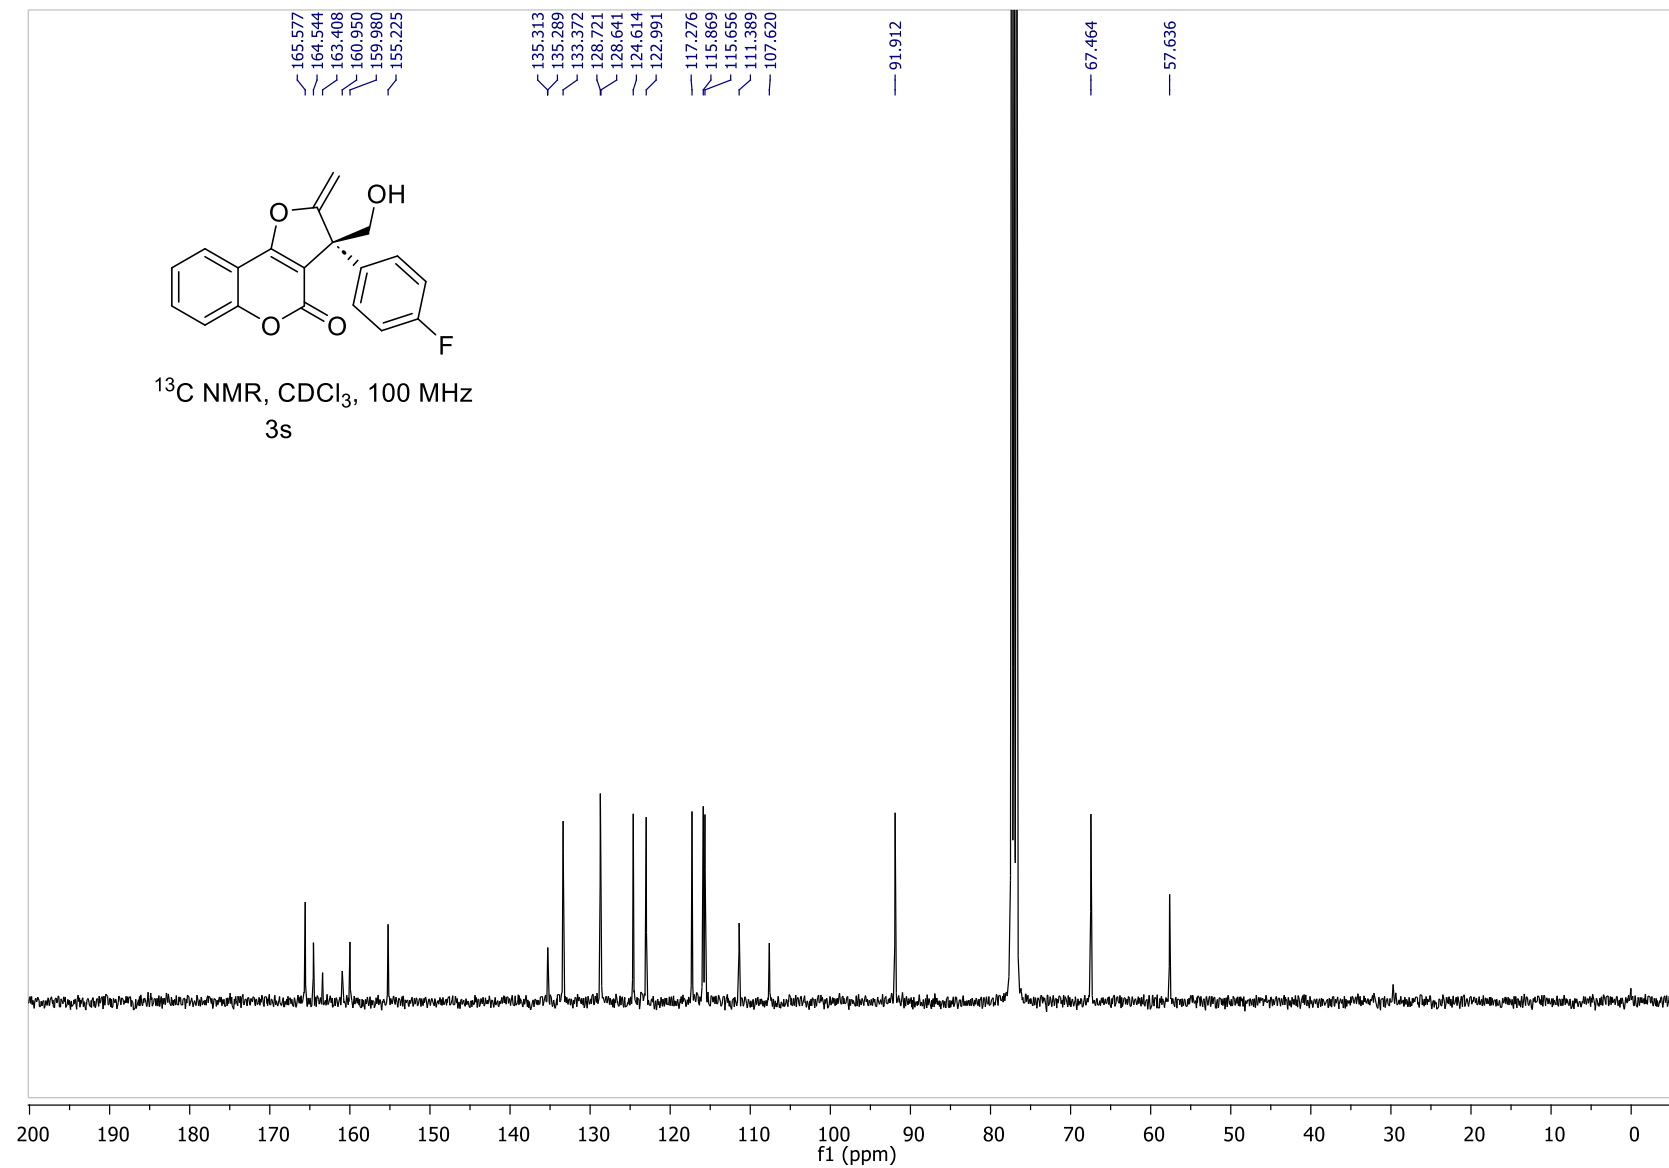

**(R)-3-(4-Fluorophenyl)-3-(hydroxymethyl)-2-methylene-2,3-dihydro-4H-furo[3,2-c]chromen-4-one (3s)**

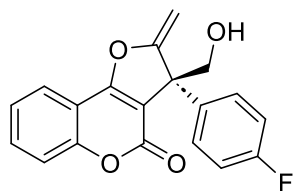

<sup>19</sup>F NMR, CDCl<sub>3</sub>, 376 MHz

3s

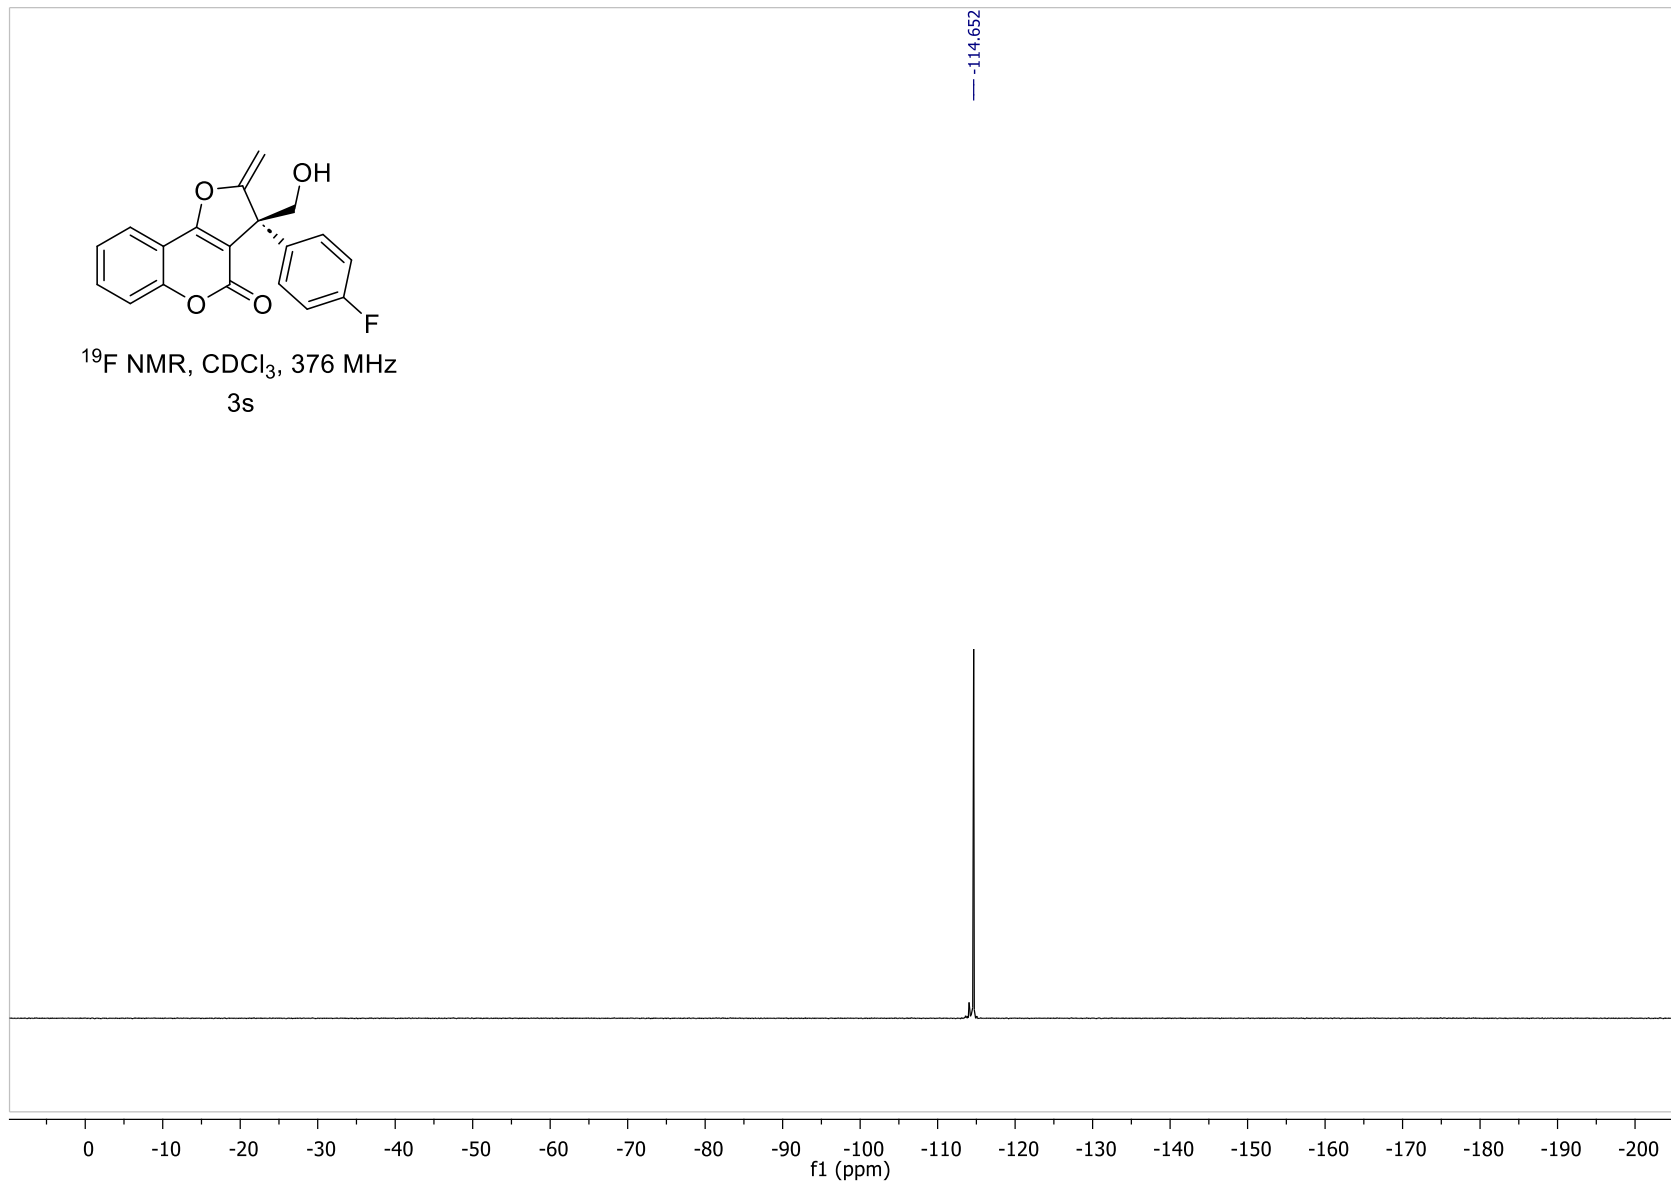

S68



**(R)-4-Methyl-N-((2-methylene-4-oxo-3-phenyl-2,3-dihydro-4H-furo[3,2-c]chromen-3-yl)methyl)benzenesulfonamide (3t)**

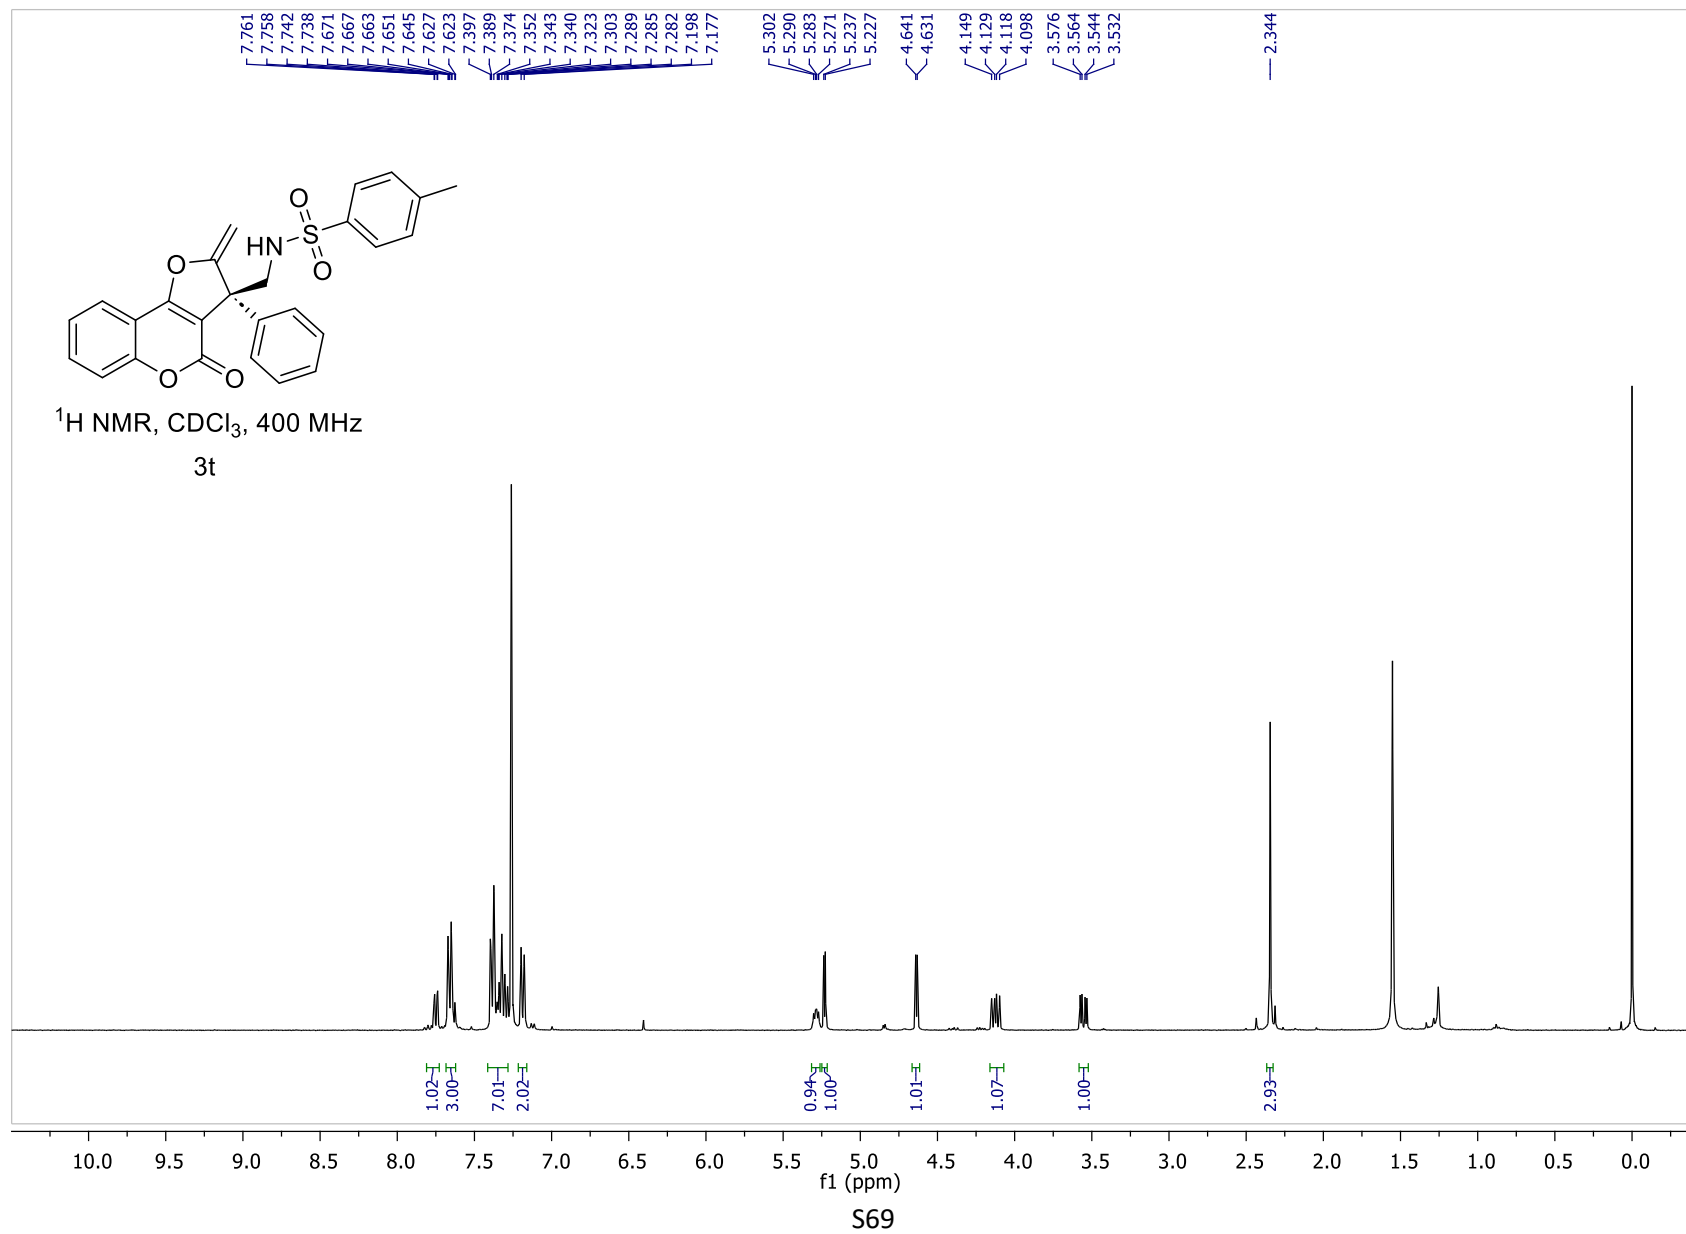

**(R)-4-Methyl-N-((2-methylene-4-oxo-3-phenyl-2,3-dihydro-4H-furo[3,2-c]chromen-3-yl)methyl)benzenesulfonamide (3t)**

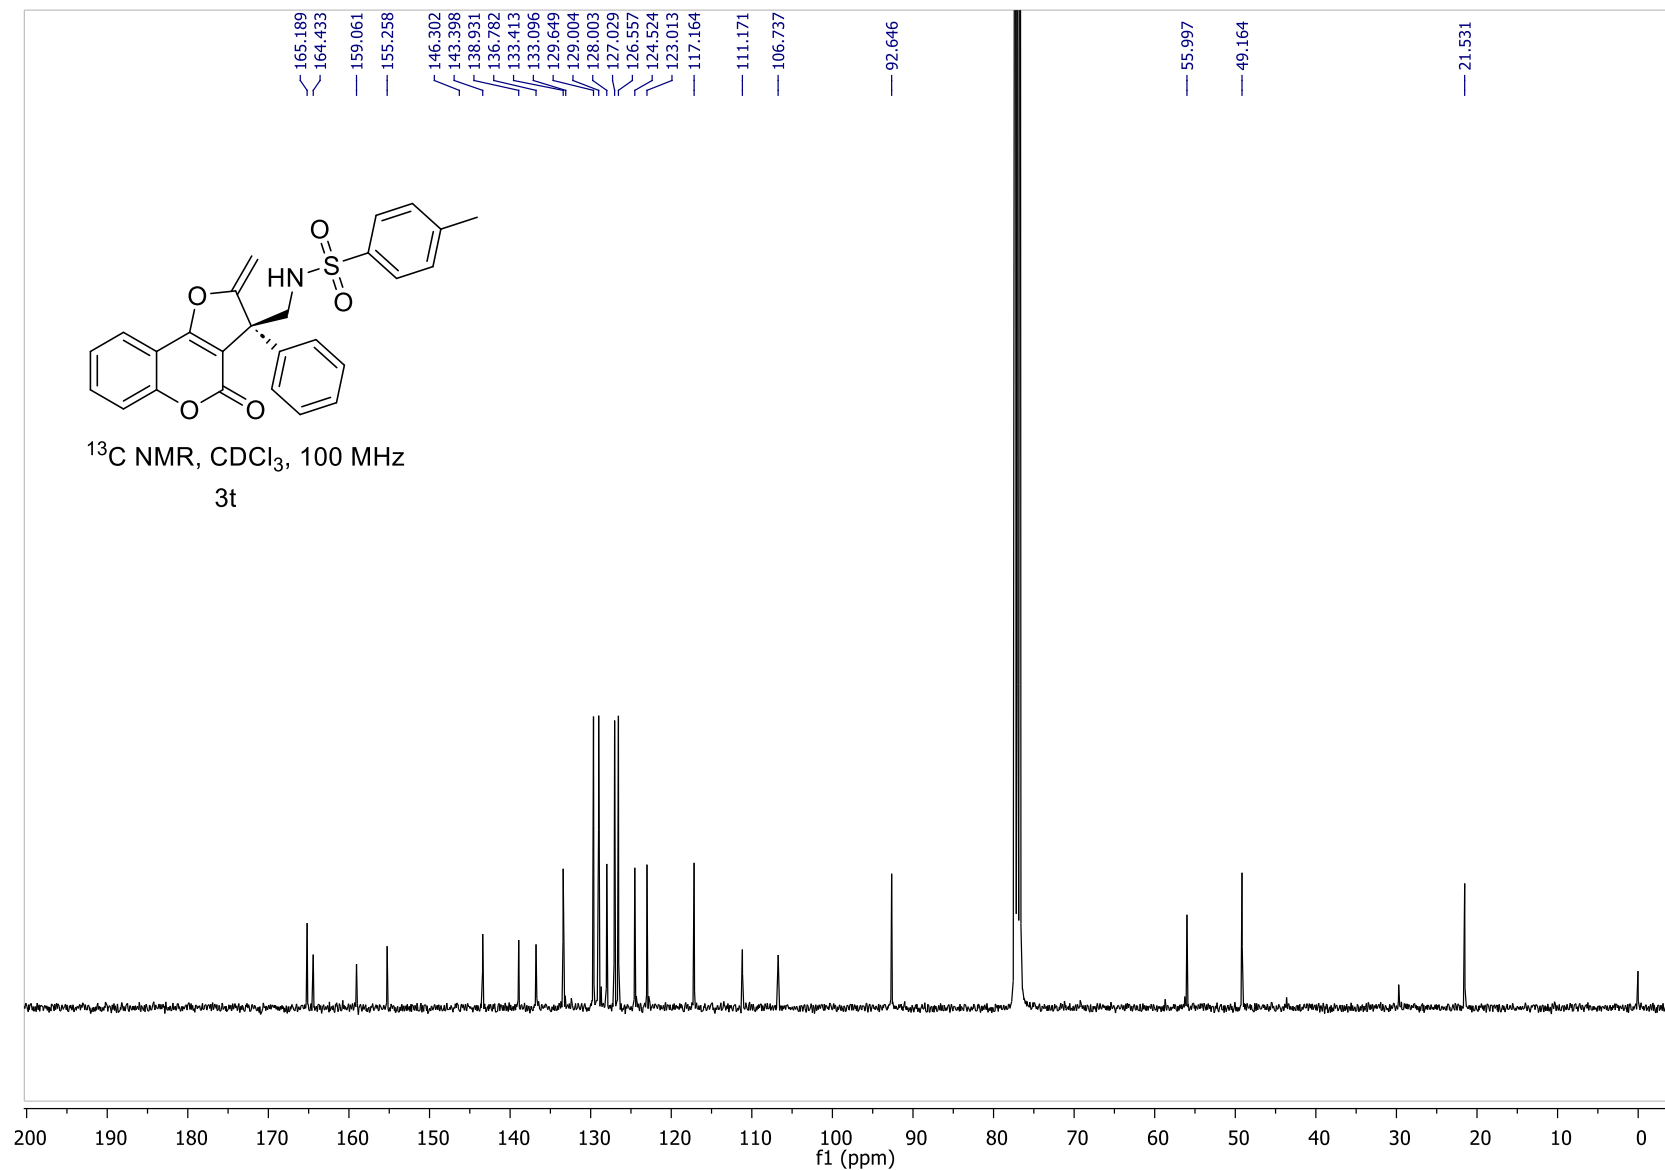

**(R)-3-(Hydroxymethyl)-2-methylene-3-phenyl-2,3-dihydro-4H-thiopheno[4,3-b]furan-4-one (3u)**

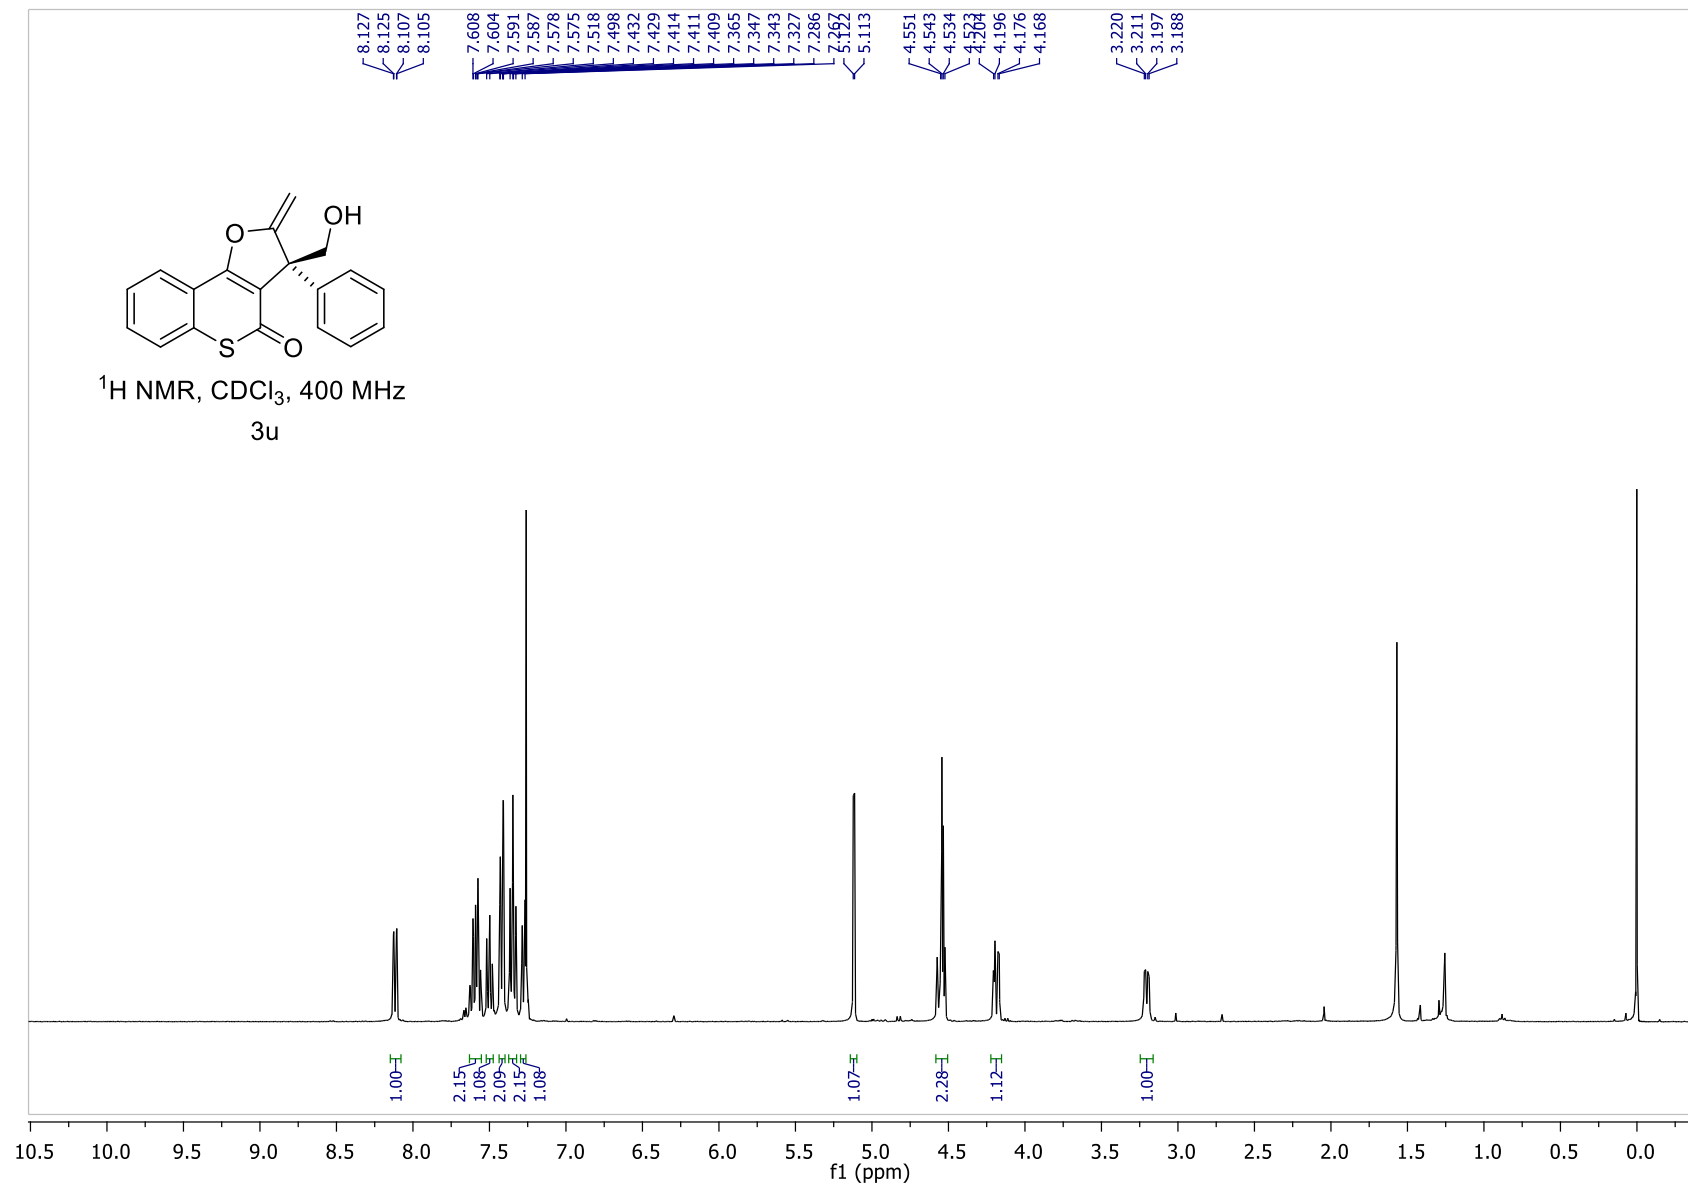

**(R)-3-(Hydroxymethyl)-2-methylene-3-phenyl-2,3-dihydro-4H-thiochromeno[4,3-b]furan-4-one (3u)**

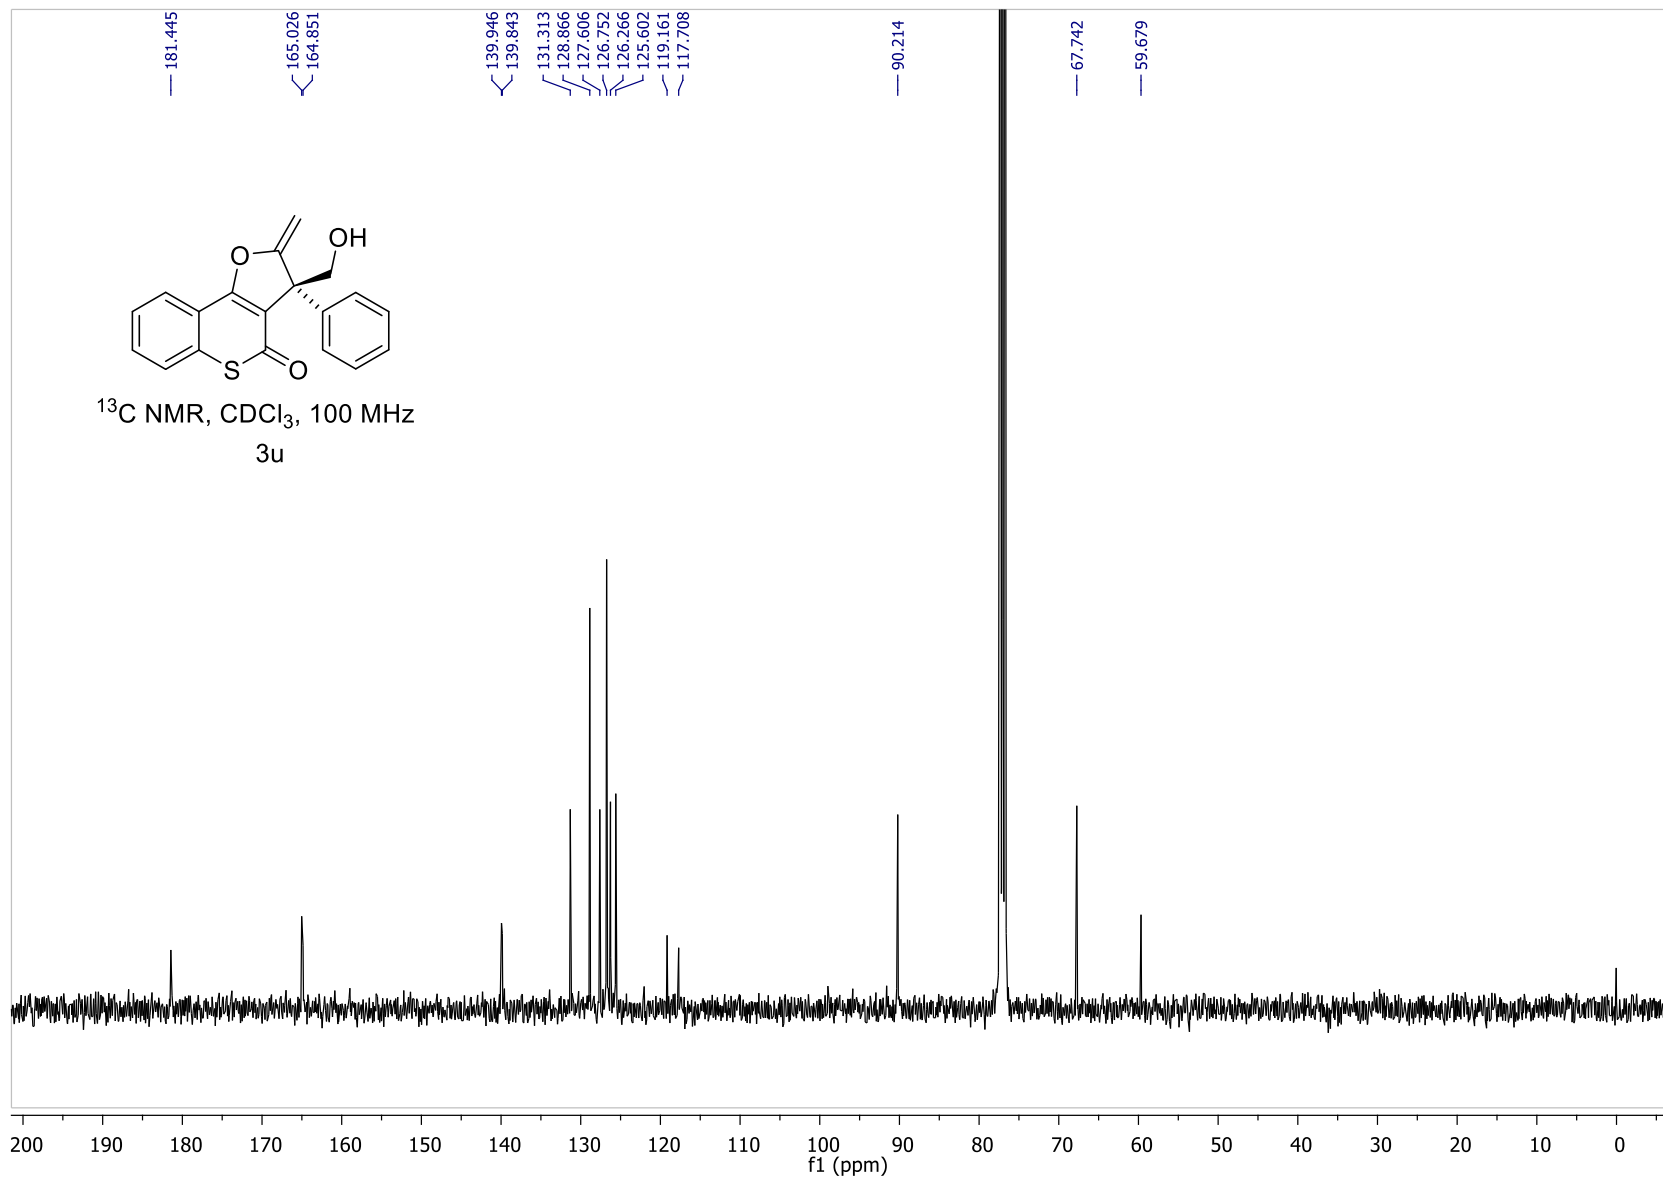

**(R)-3-(Hydroxymethyl)-2-methylene-3-(naphthalen-2-yl)-2,3-dihydro-4H-thiochromeno[4,3-b]furan-4-one (3v)**

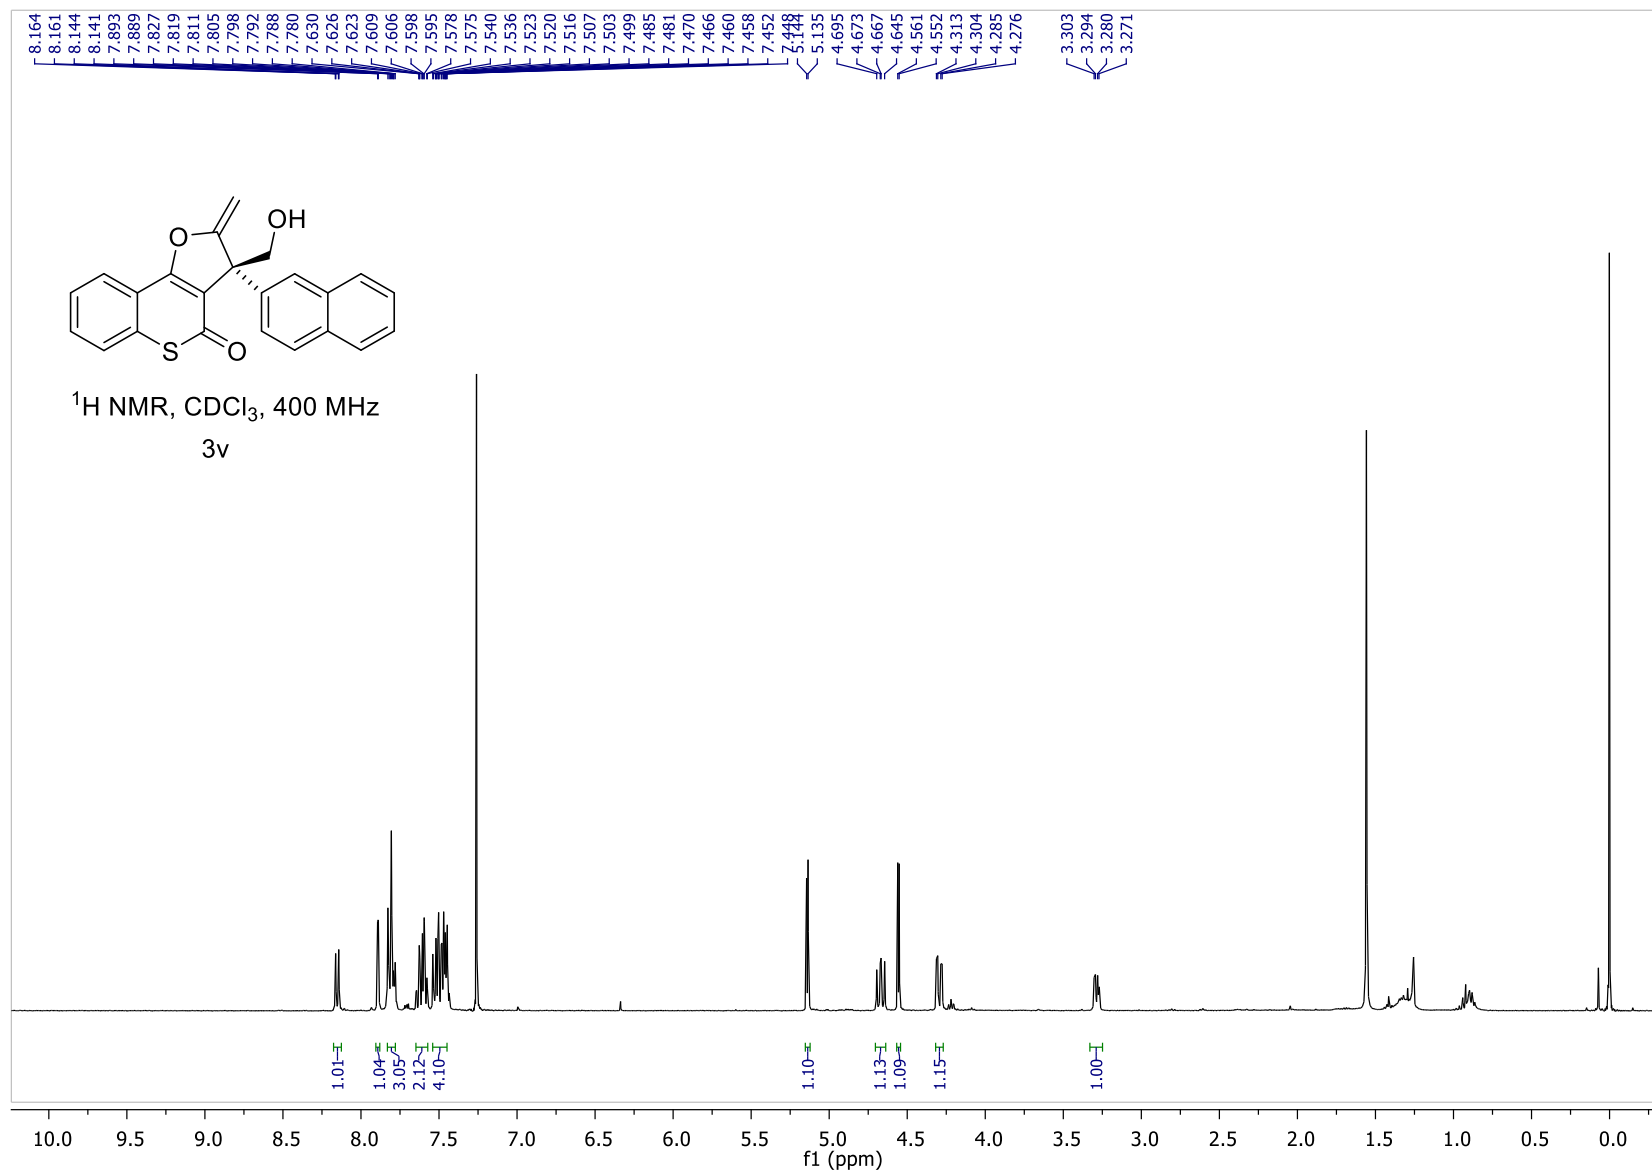

**(R)-3-(Hydroxymethyl)-2-methylene-3-(naphthalen-2-yl)-2,3-dihydro-4H-thiochromeno[4,3-b]furan-4-one (3v)**

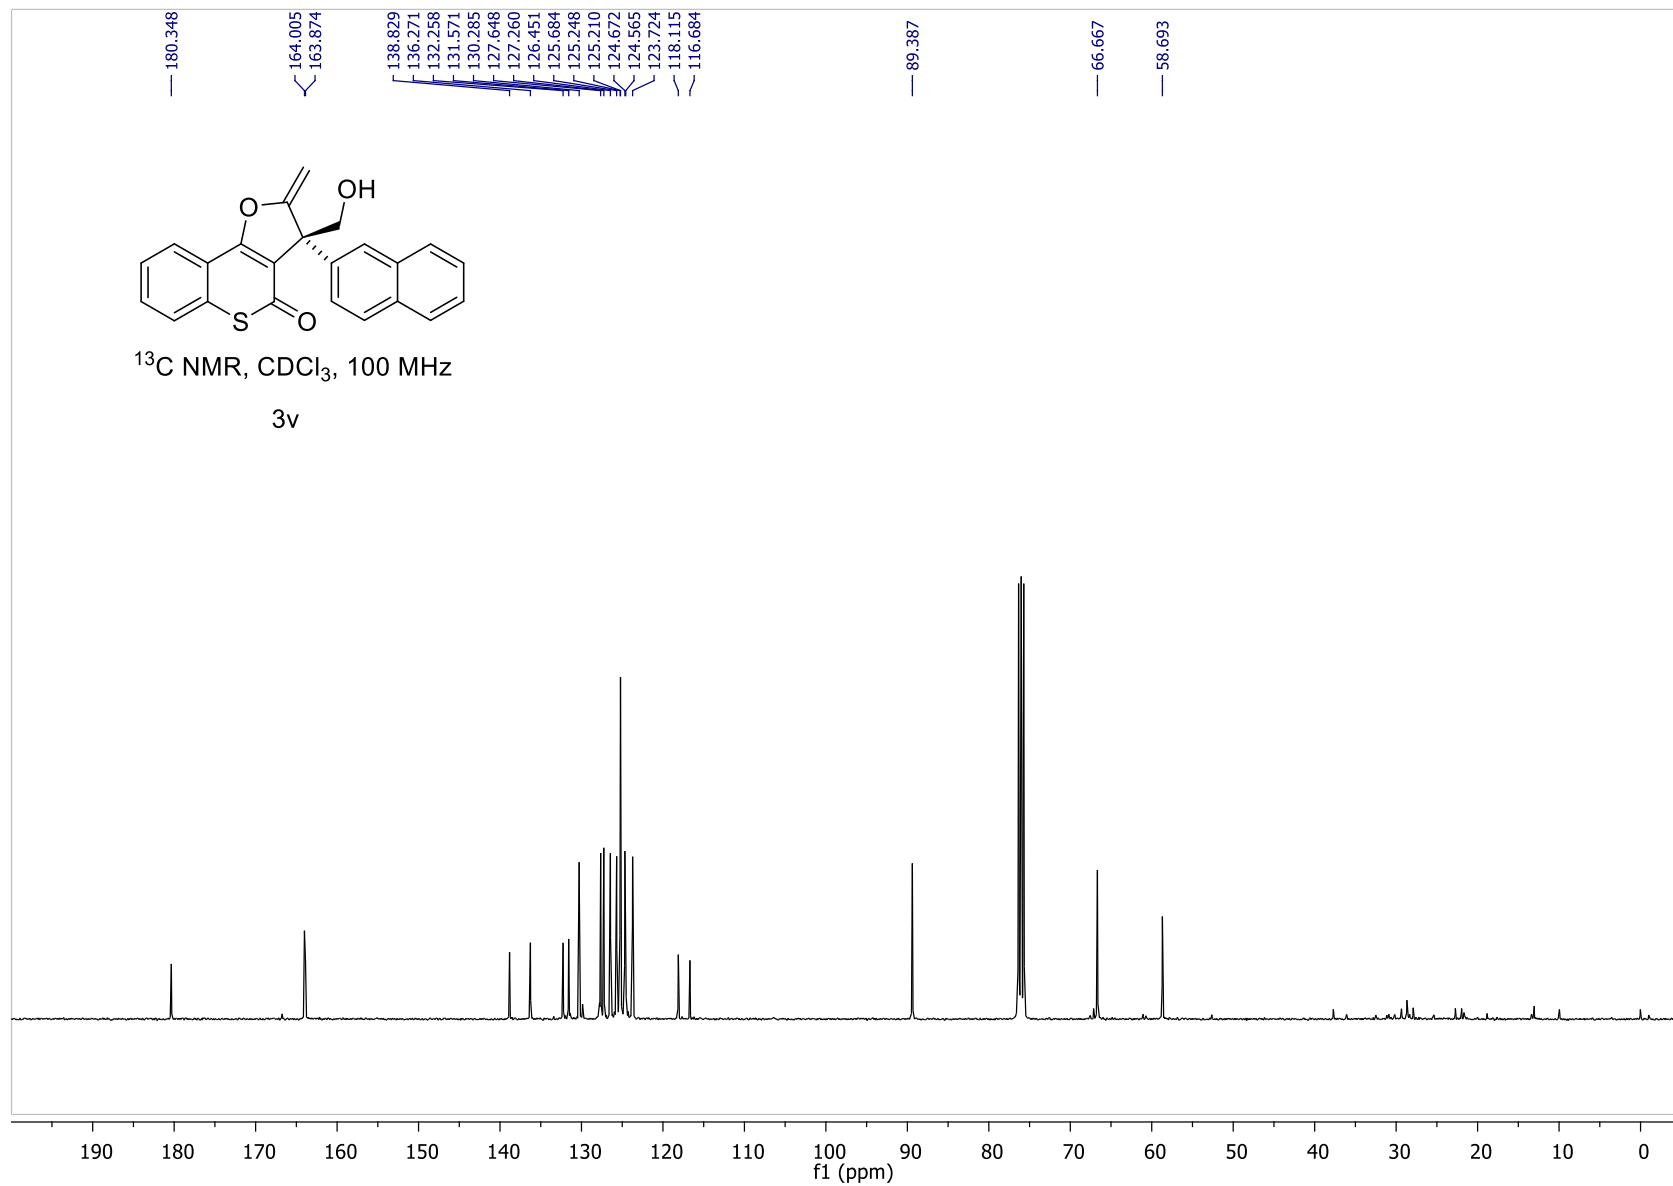

**(R)-4-Methyl-N-((2-methylene-4-oxo-3-phenyl-2,3-dihydro-4H-thiochromeno[4,3-b]furan-3-yl)methyl)benzenesulfonamide (3w)**

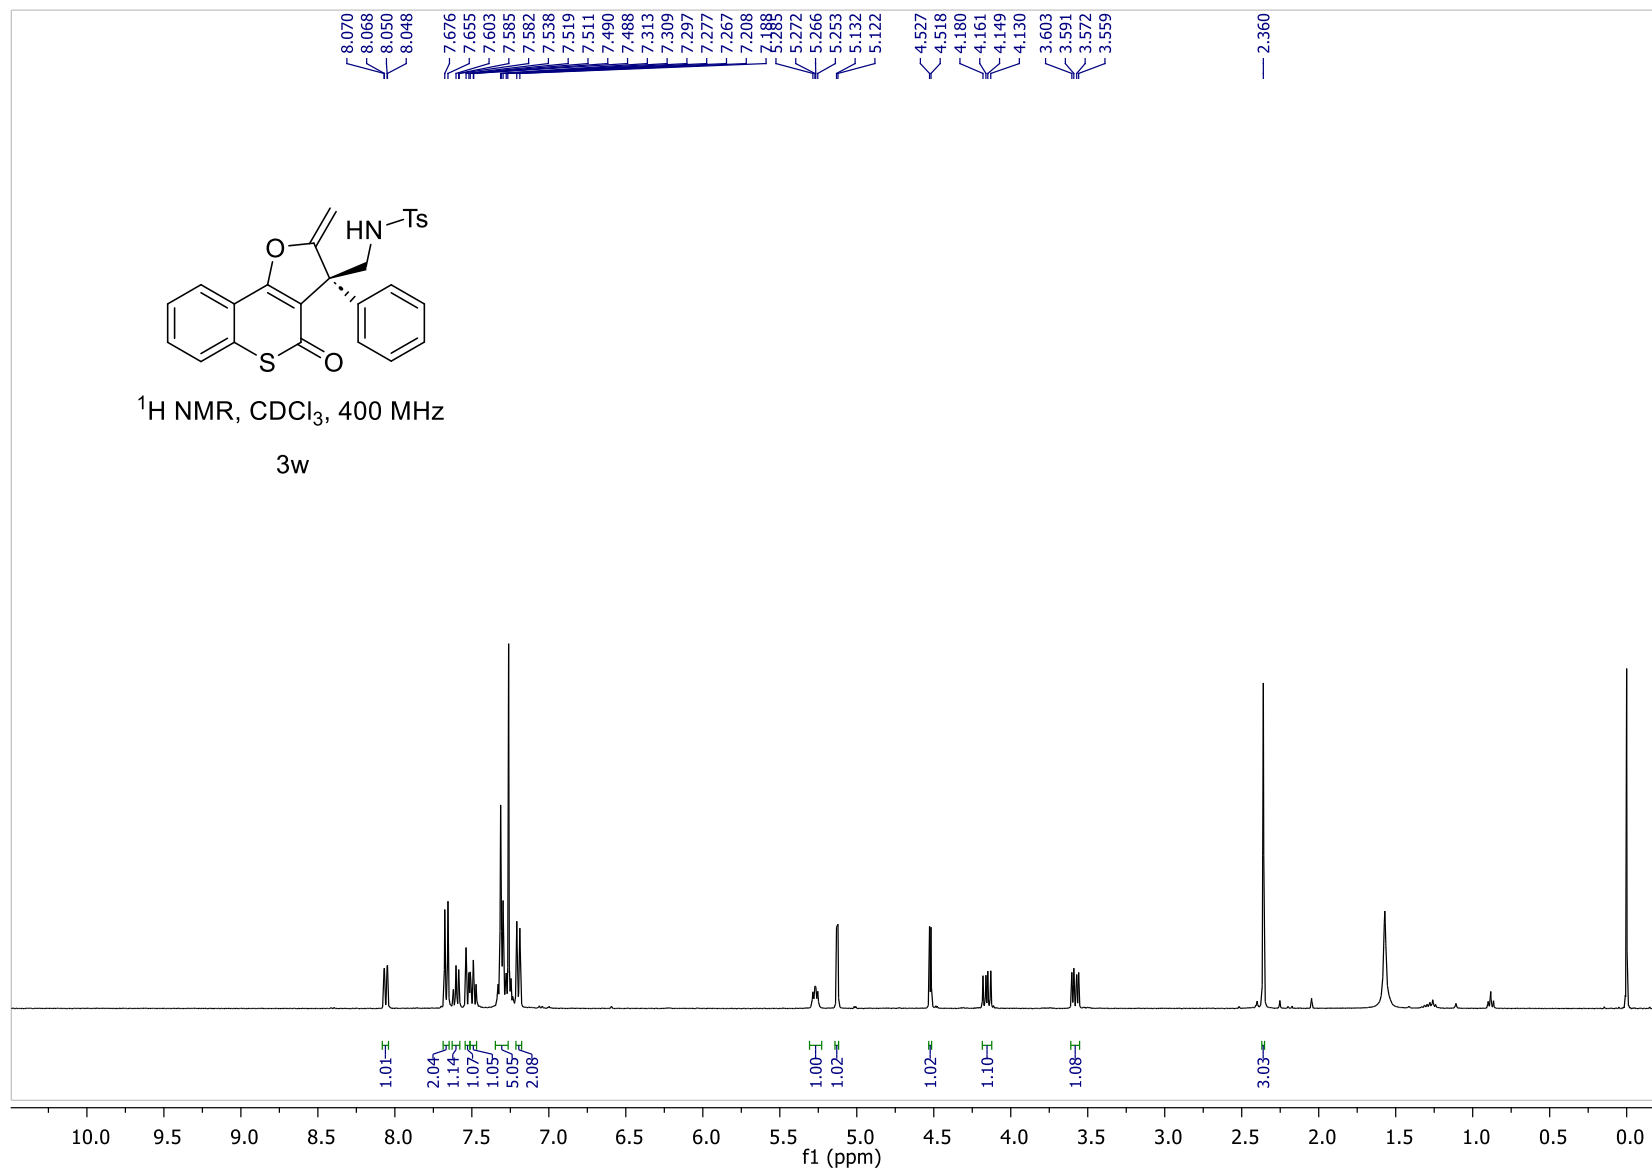

**(R)-4-Methyl-N-((2-methylene-4-oxo-3-phenyl-2,3-dihydro-4H-thiochromeno[4,3-b]furan-3-yl)methyl)benzenesulfonamide(3w)**

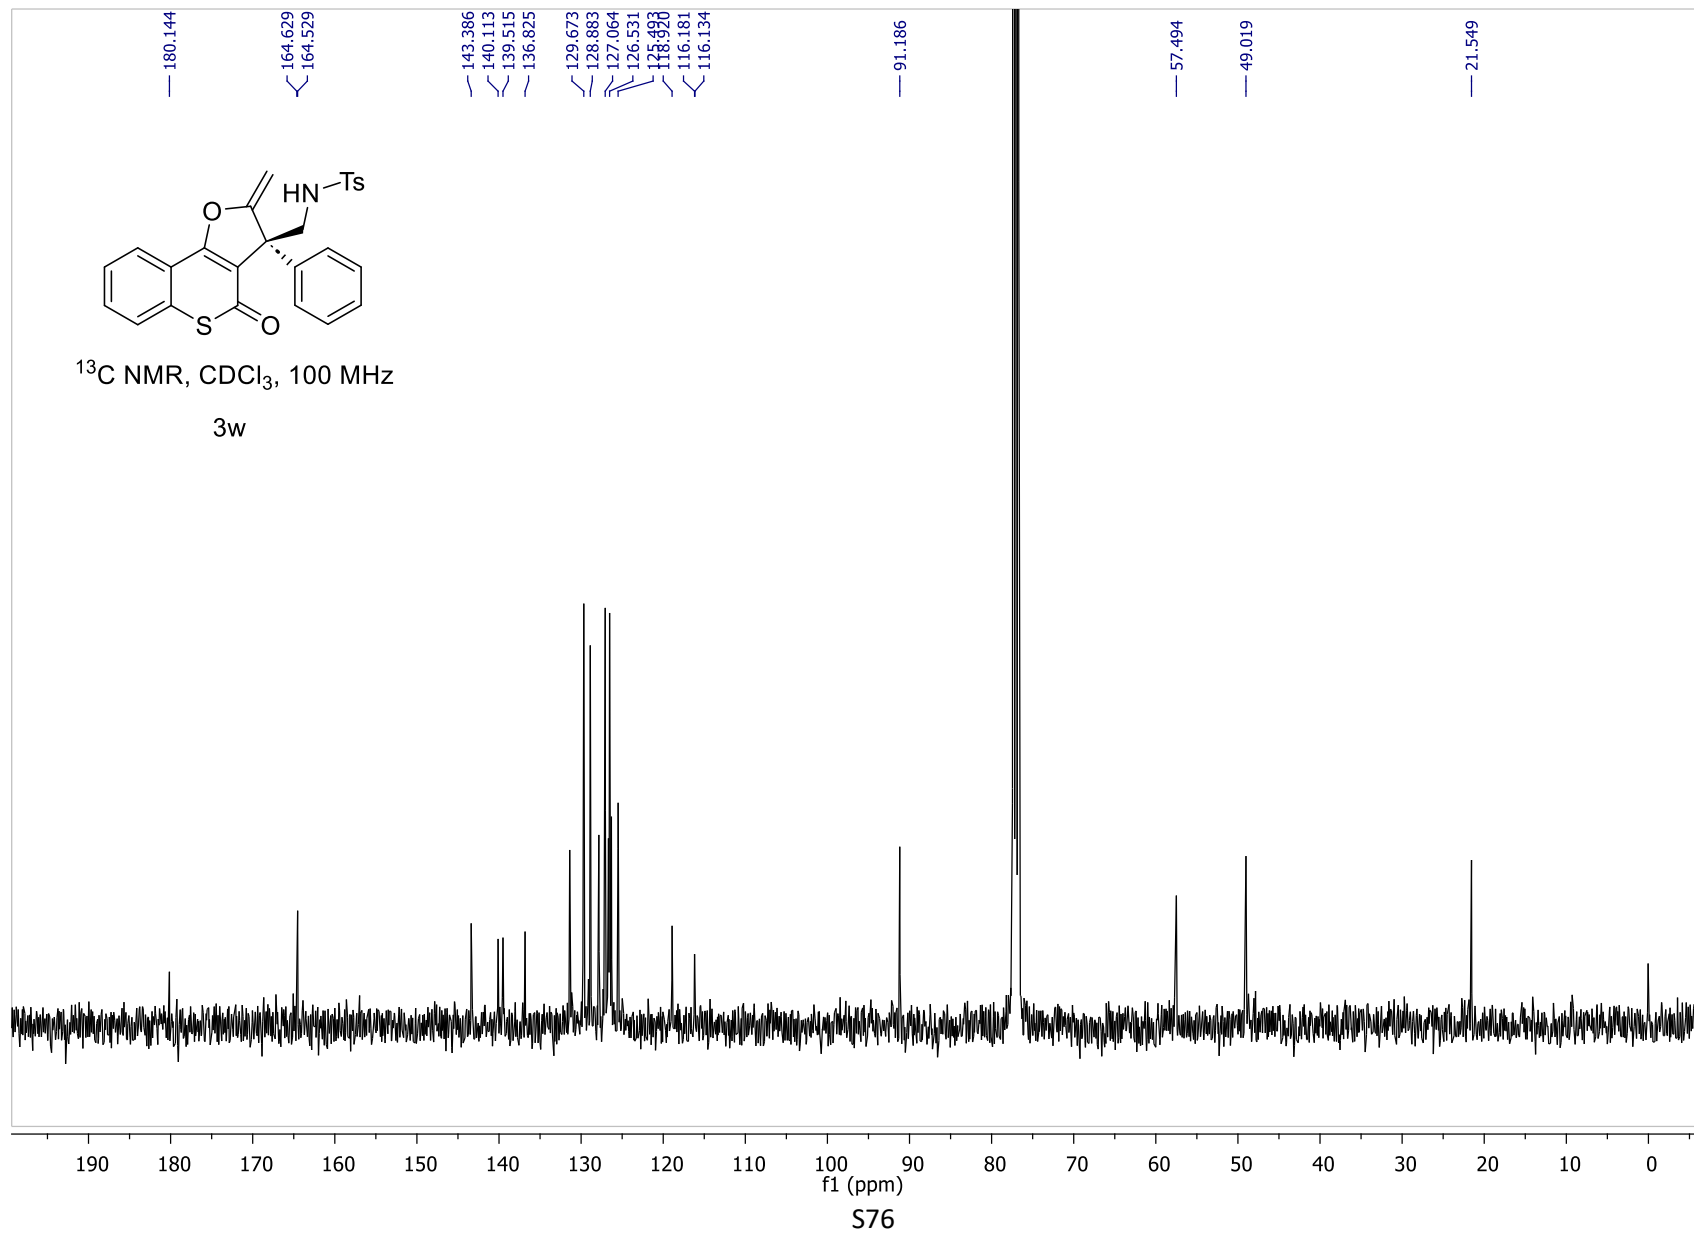



**(2-Methylene-3-phenyl-2,3-dihydro[1,2-b]furan-3-yl)methanol (5a)**

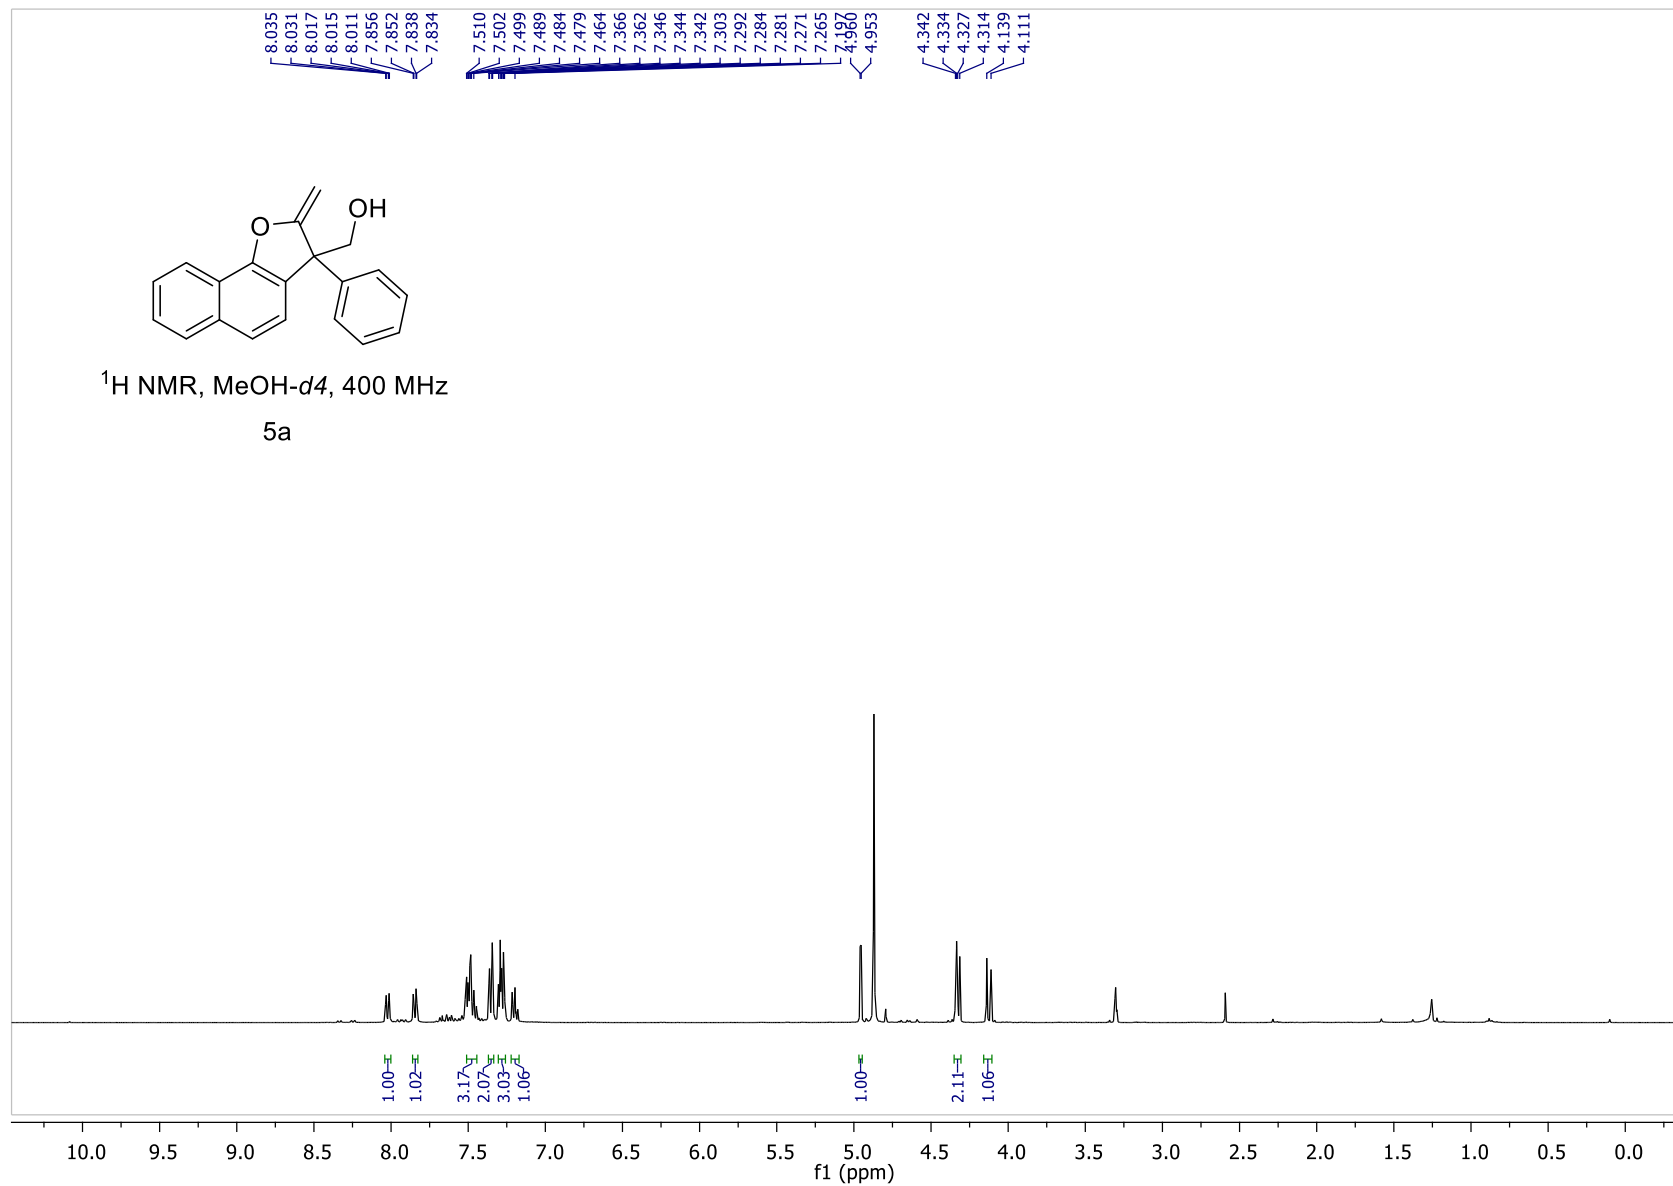

**(2-Methylene-3-phenyl-2,3-dihydrophtho[1,2-*b*]furan-3-yl)methanol (5a)**

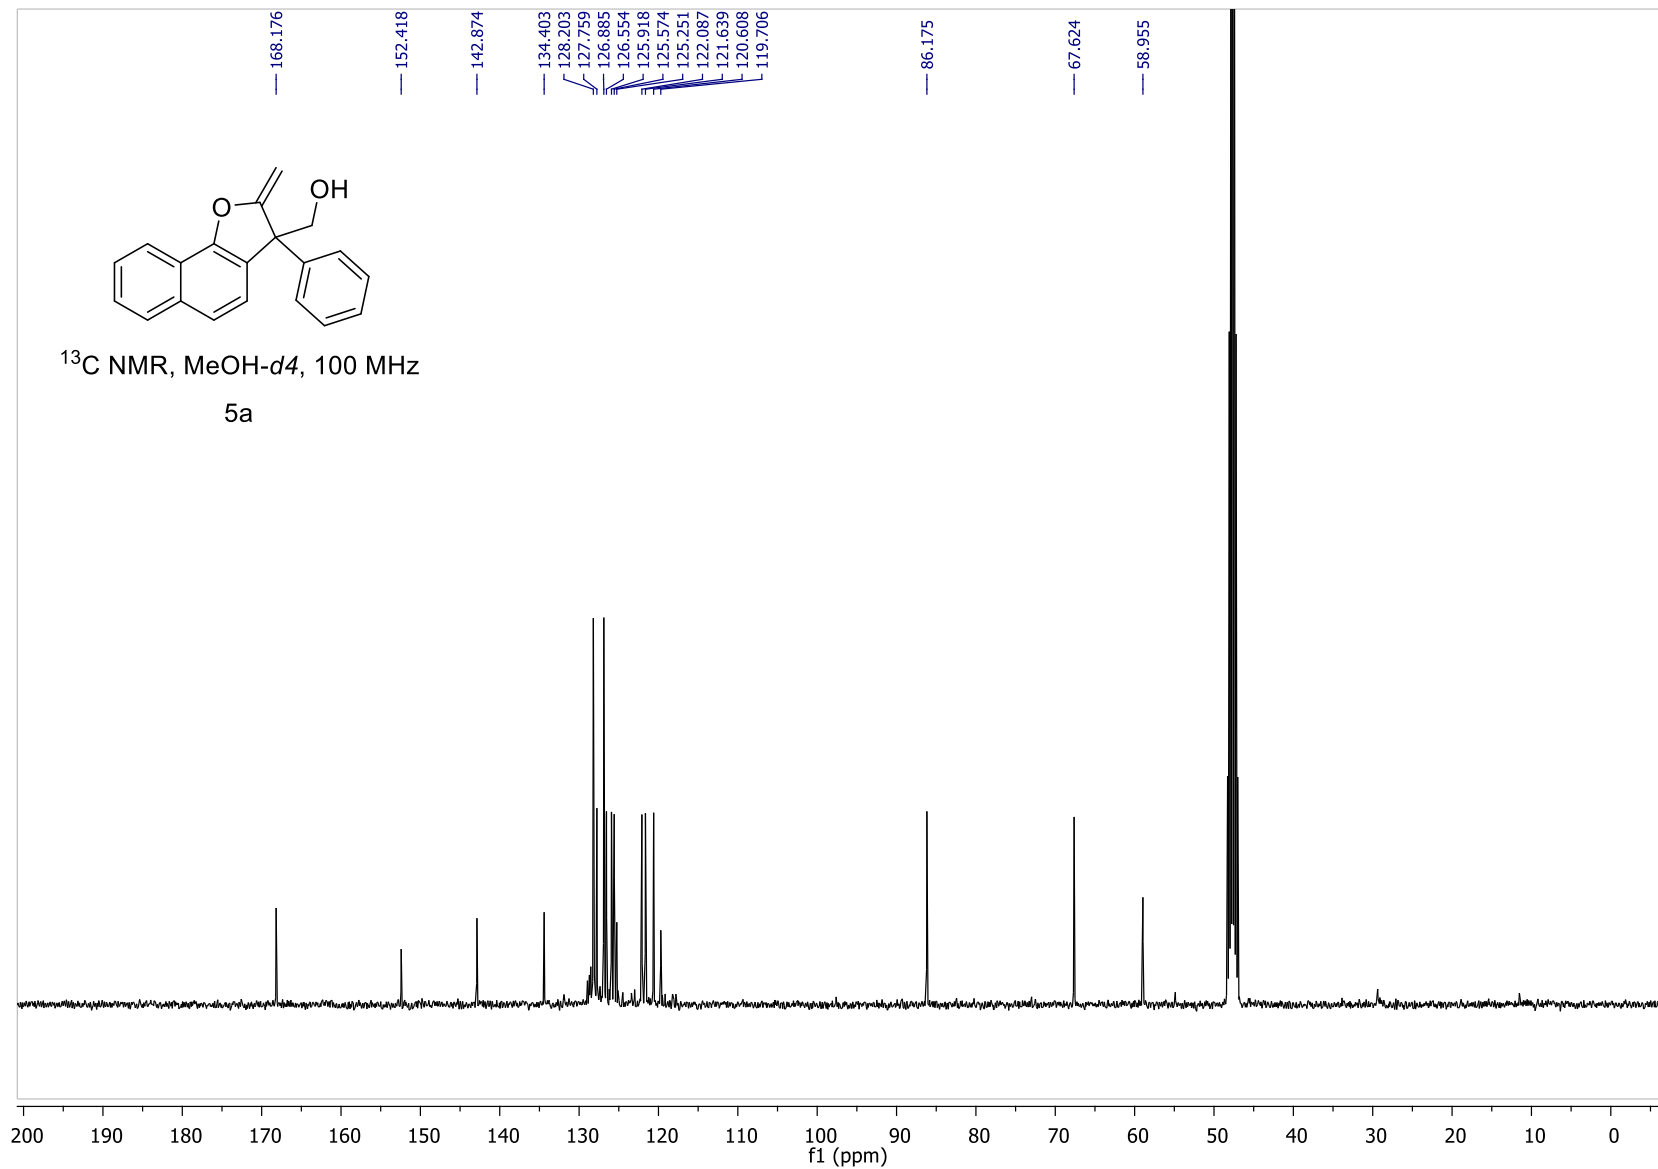

**(3-(4-Chlorophenyl)-2-methylene-2,3-dihydro[1,2-b]furan-3-yl)methanol (5b)**

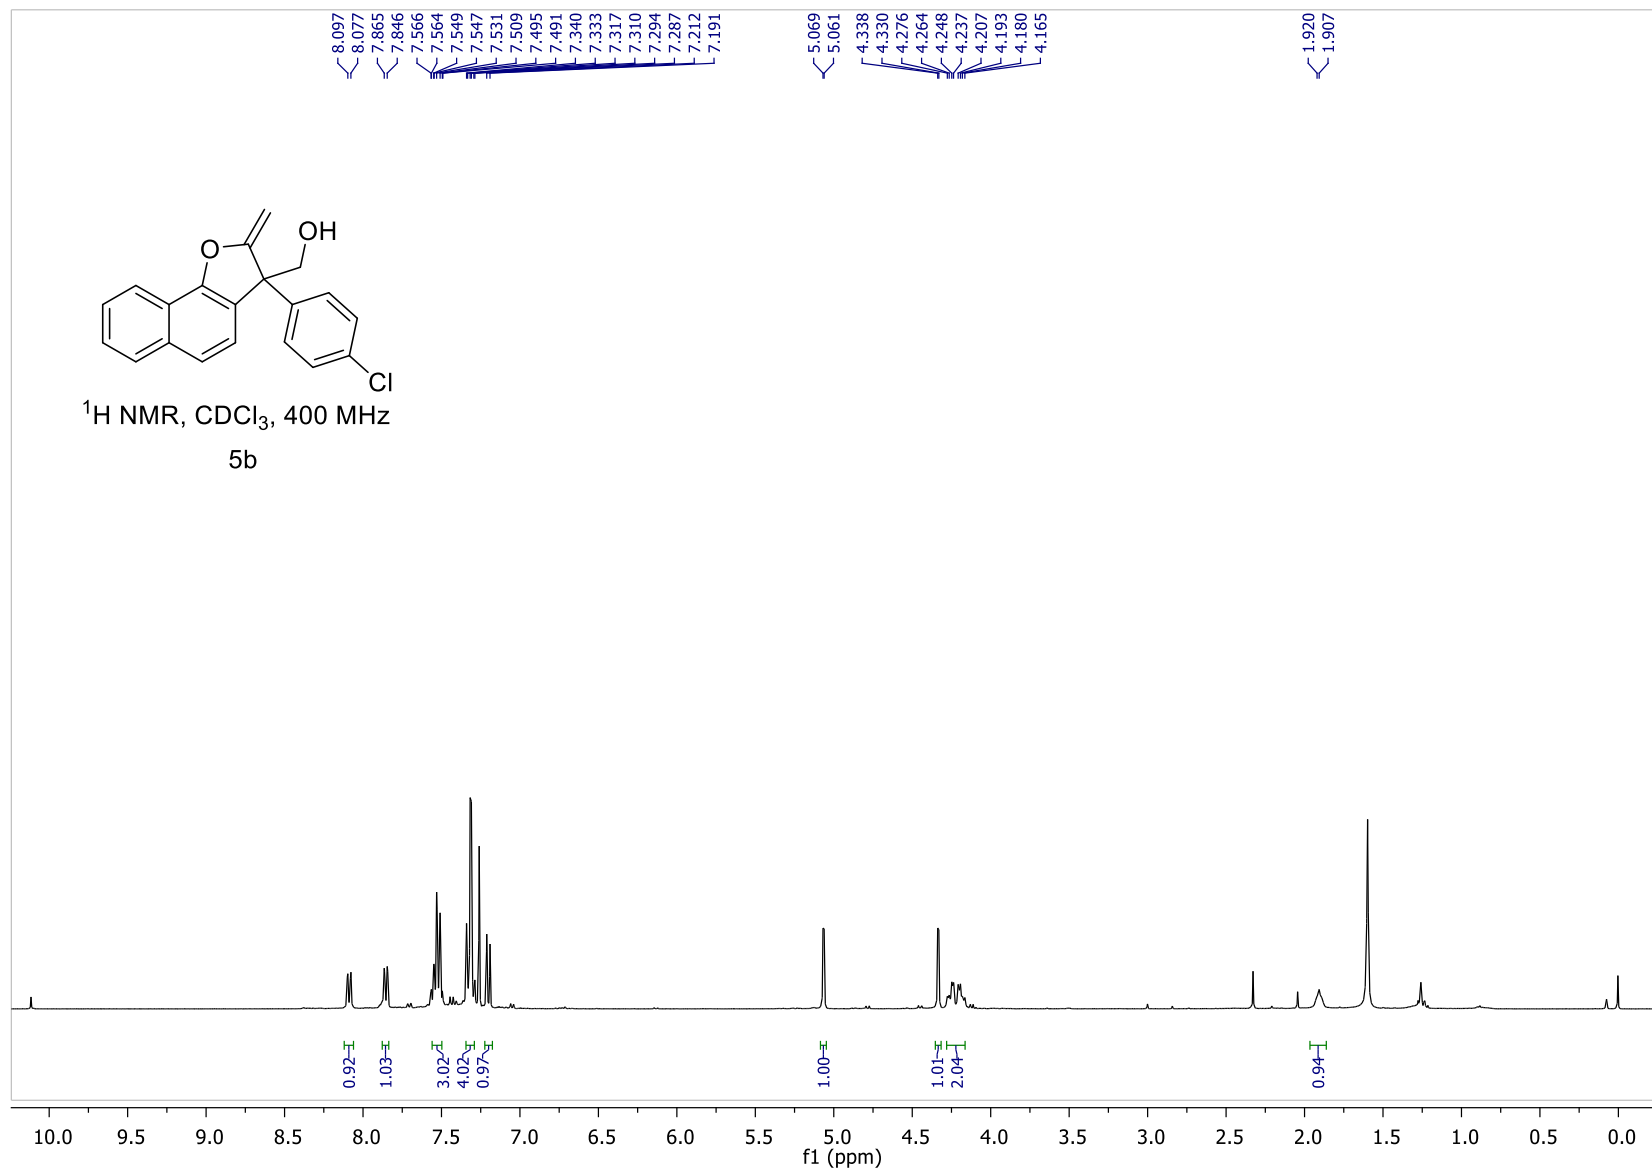

**(3-(4-Chlorophenyl)-2-methylene-2,3-dihydronaphtho[1,2-*b*]furan-3-yl)methanol (5b)**

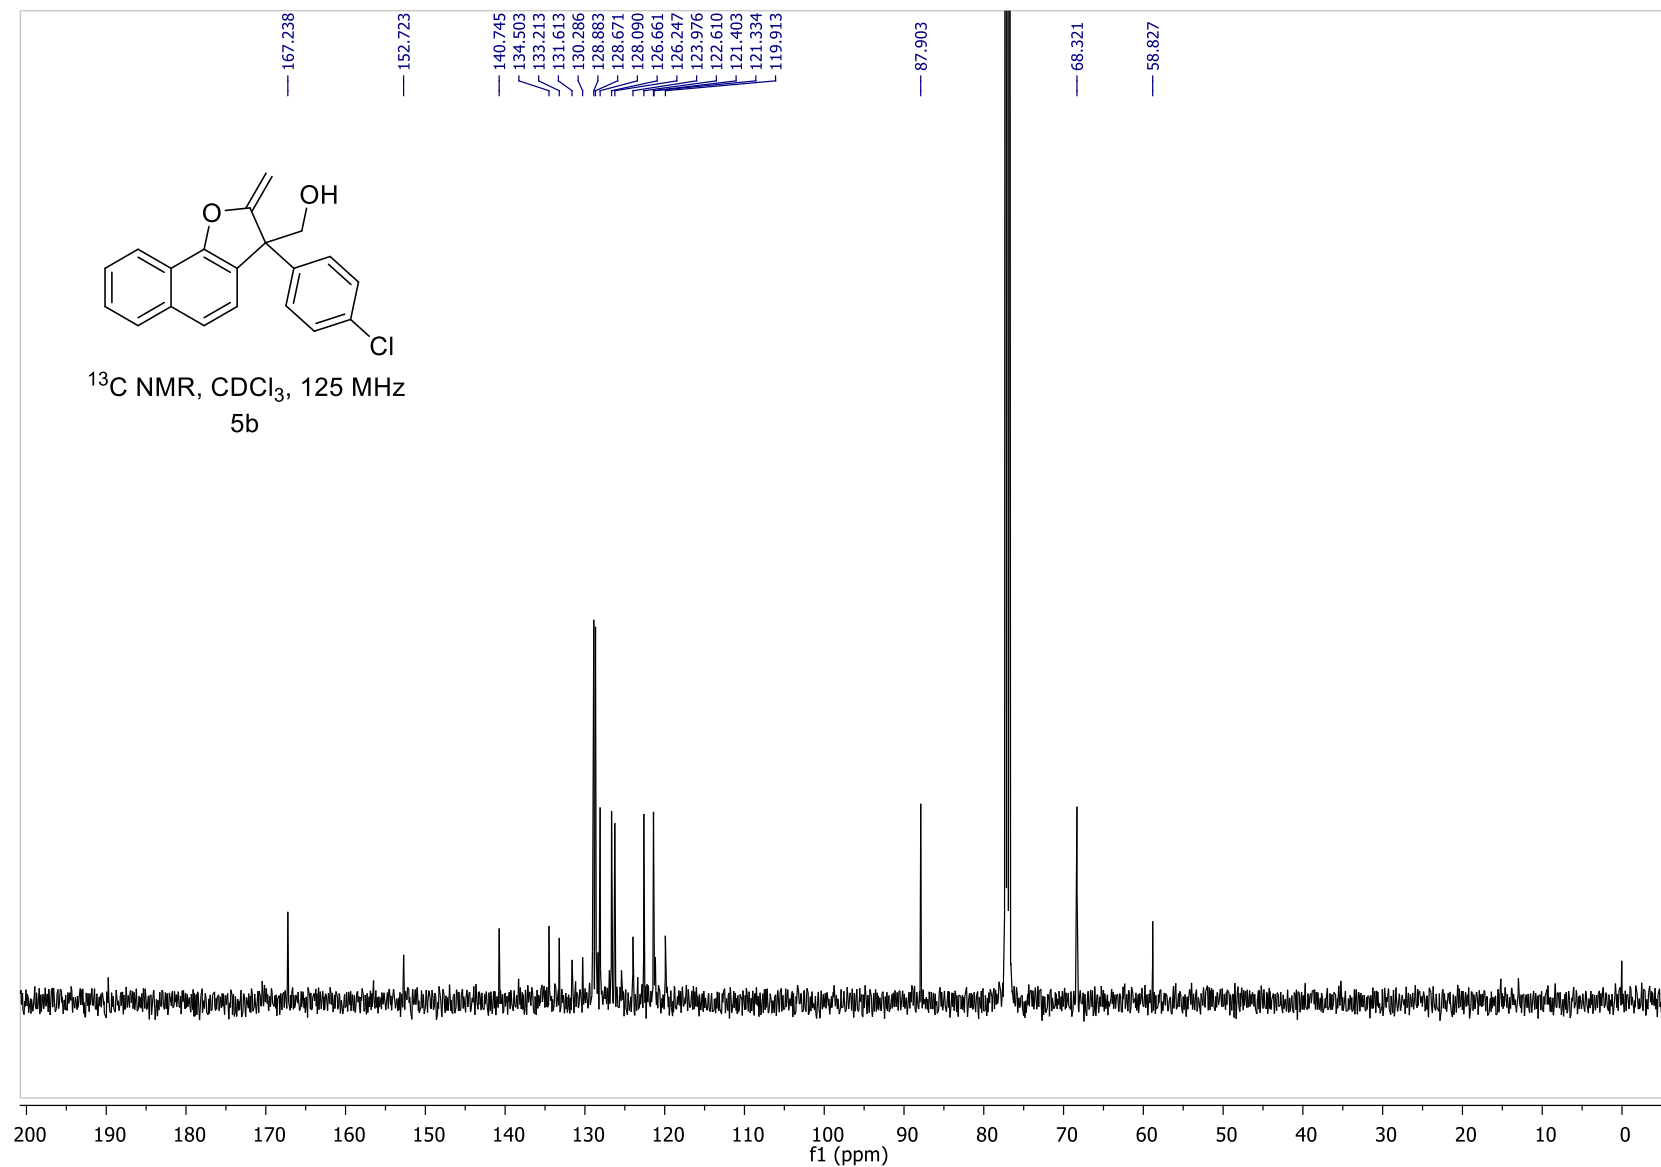

**(3-([1,1'-Biphenyl]-4-yl)-2-methylene-2,3-dihydrophtho[1,2-b]furan-3-yl)methanol (5c)**

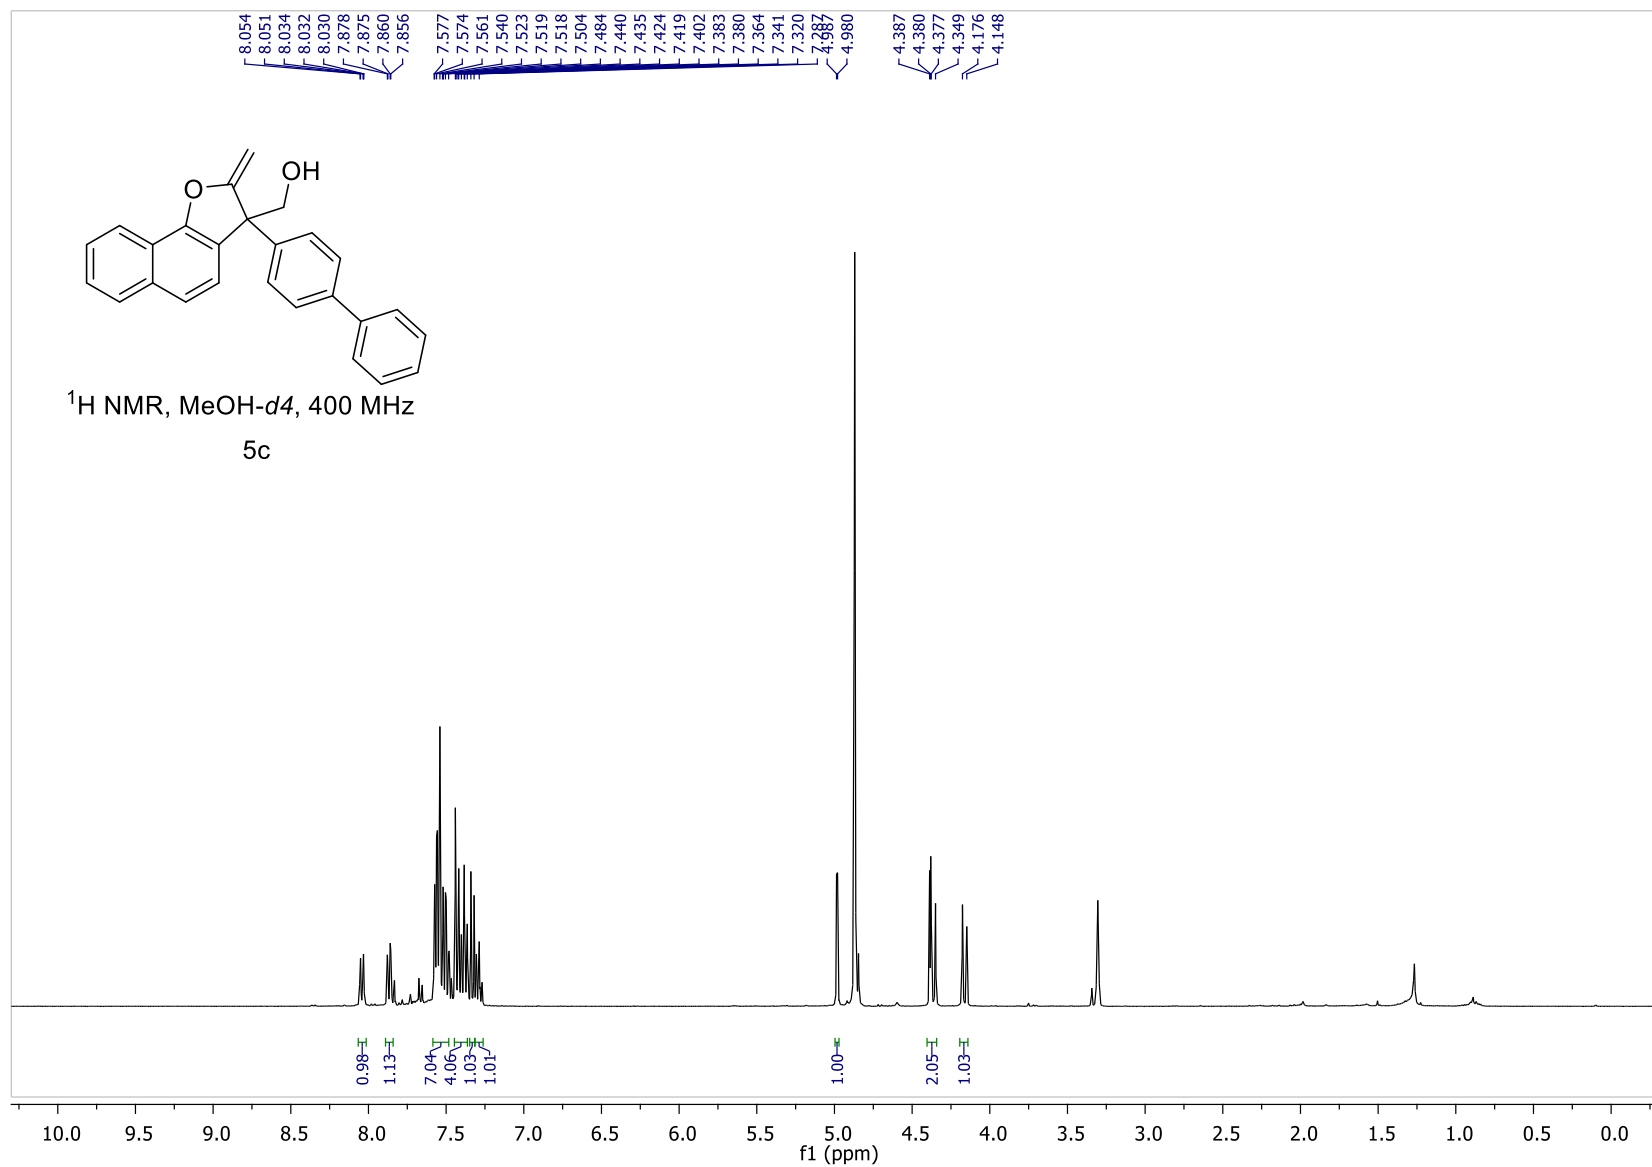

**(3-([1,1'-Biphenyl]-4-yl)-2-methylene-2,3-dihydrophtho[1,2-*b*]furan-3-yl)methanol (5c)**

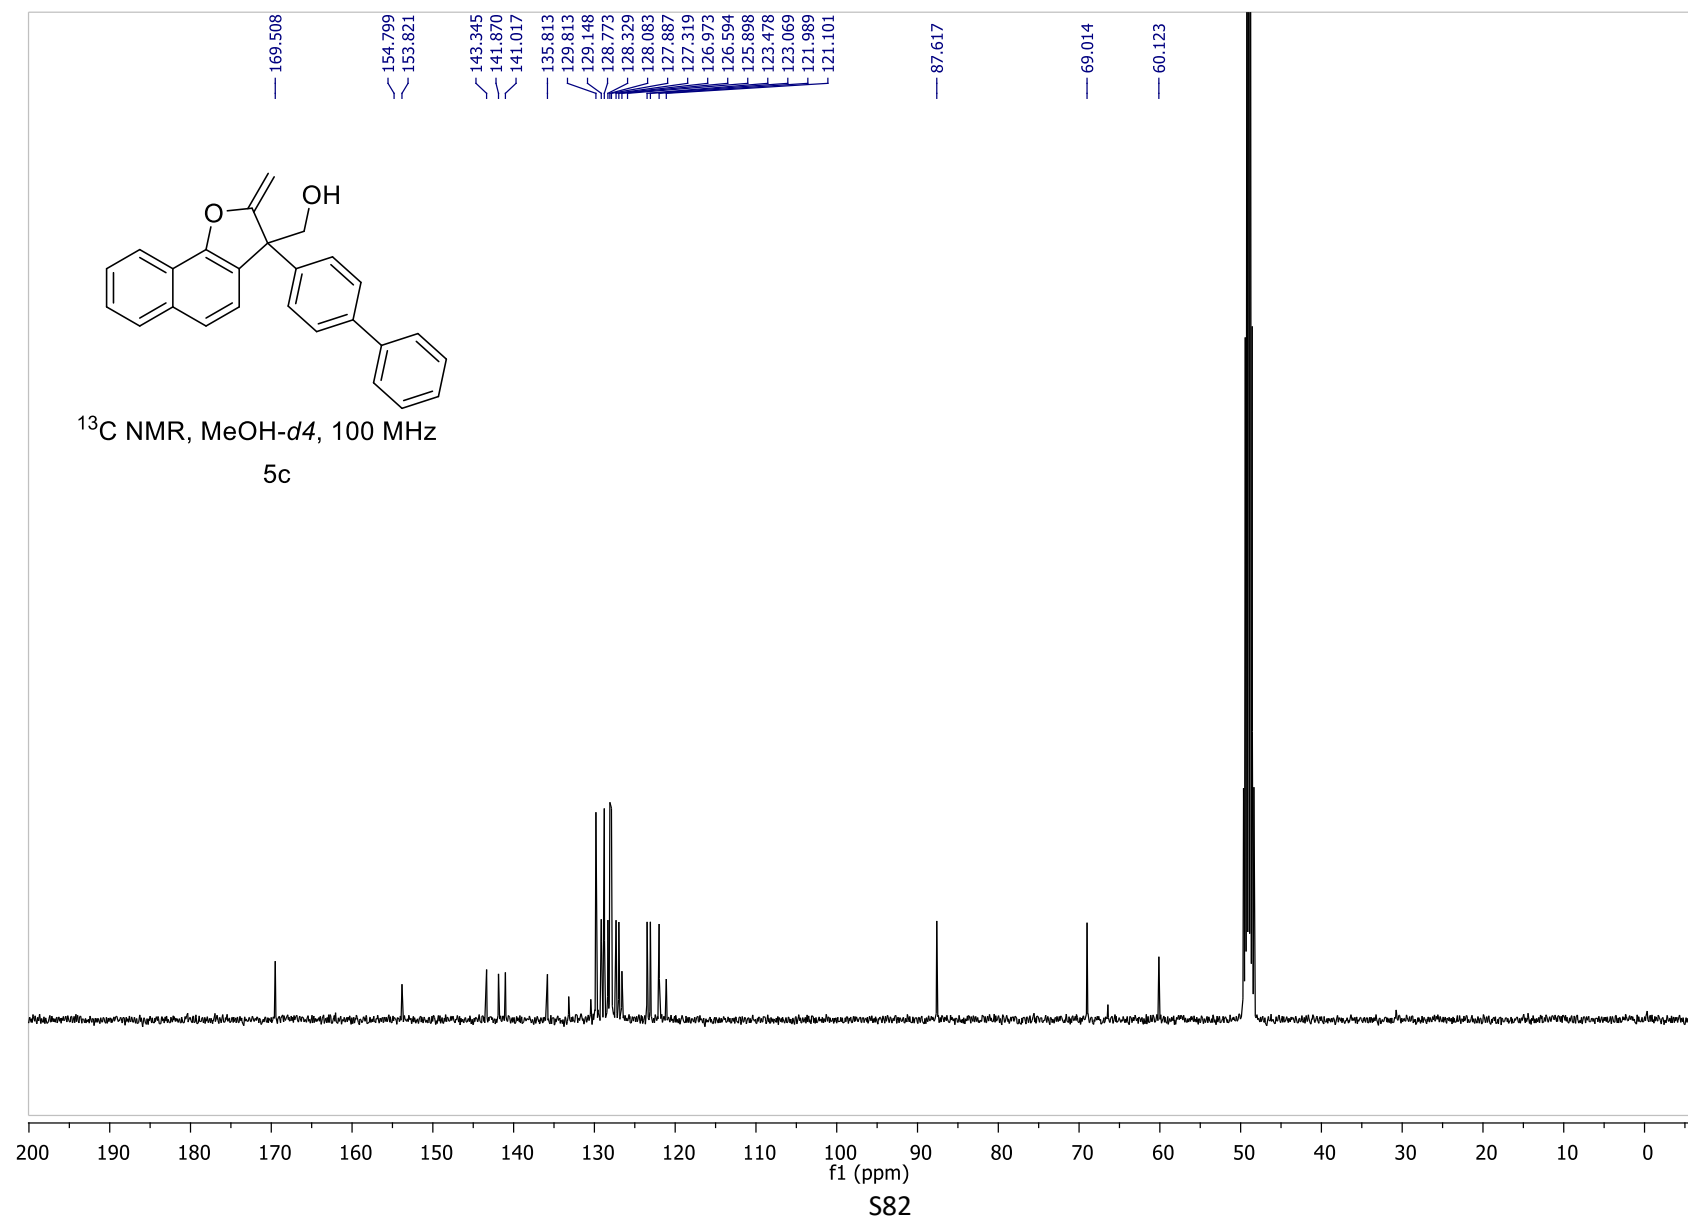

**(3-(3-Methoxyphenyl)-2-methylene-2,3-dihydro[1,2-*b*]furan-3-yl)methanol (5d)**

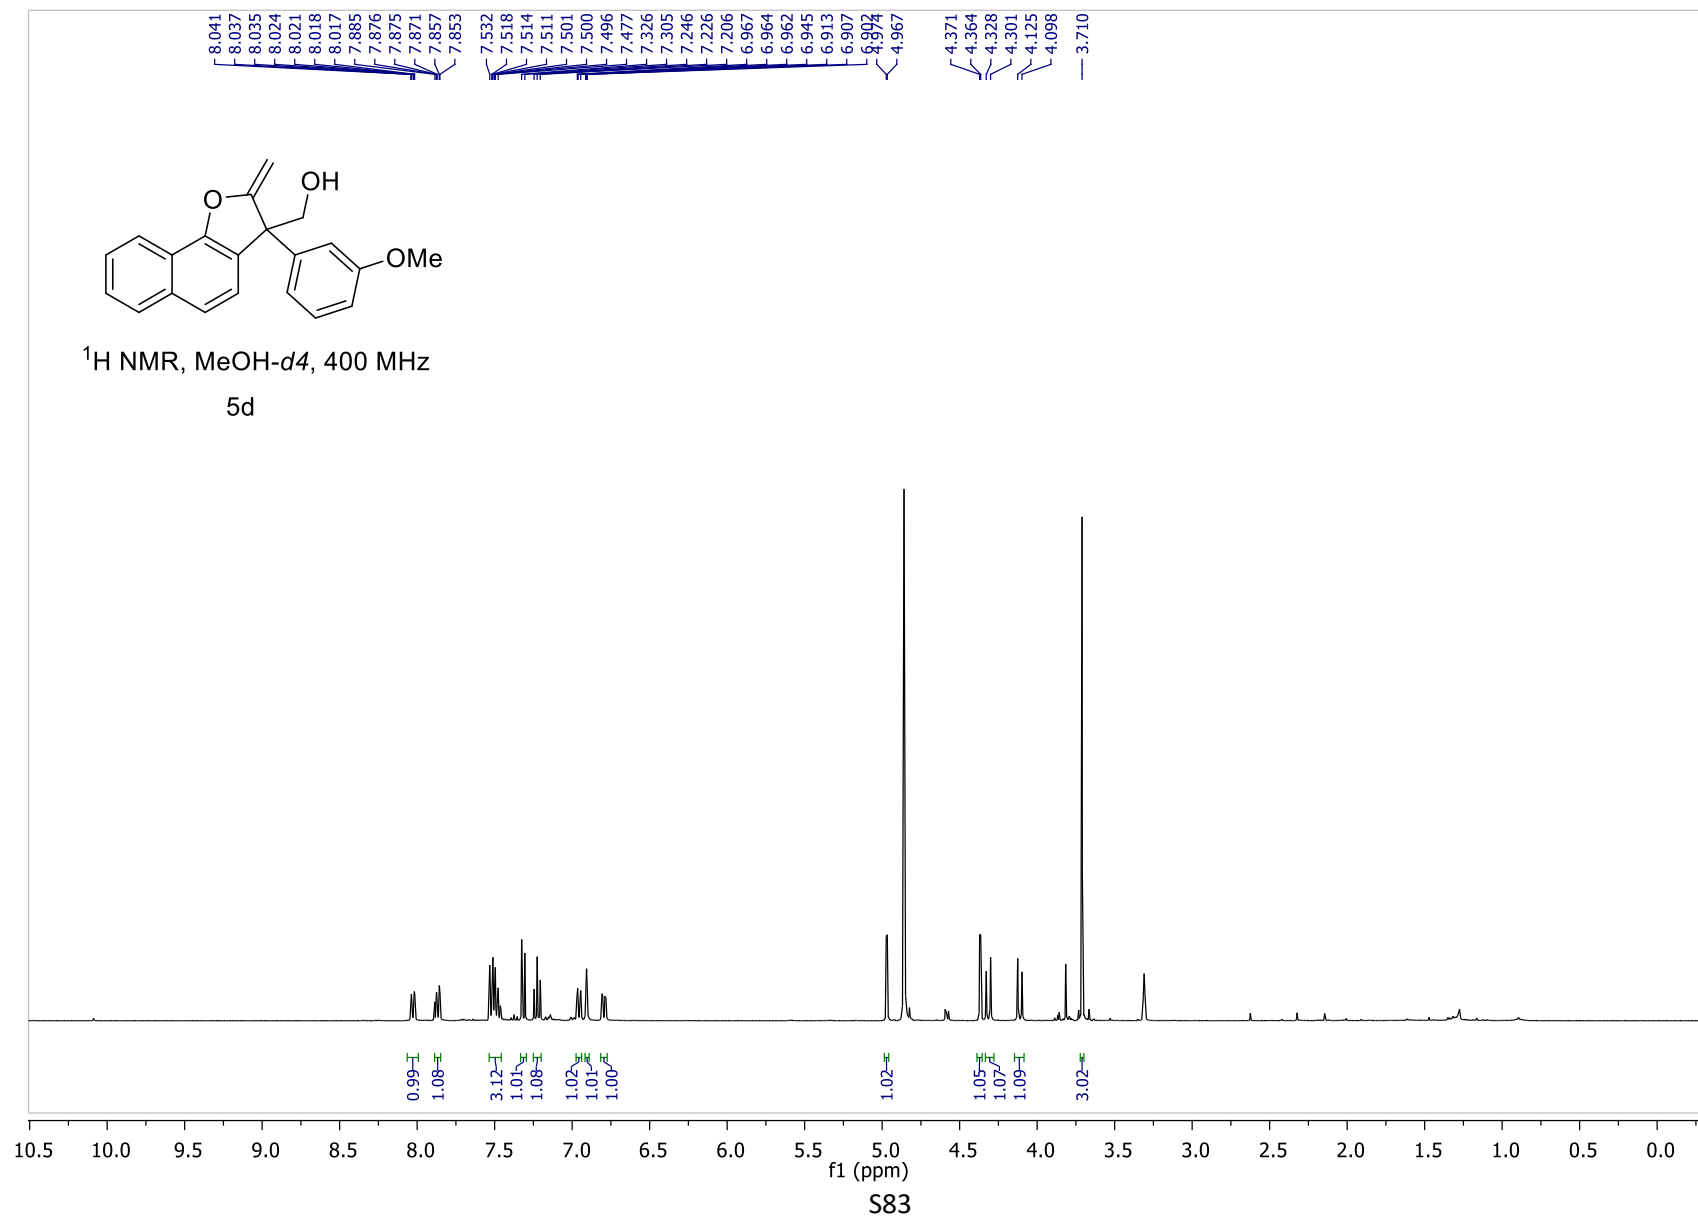

**(3-(3-Methoxyphenyl)-2-methylene-2,3-dihydronaphtho[1,2-*b*]furan-3-yl)methanol (5d)**

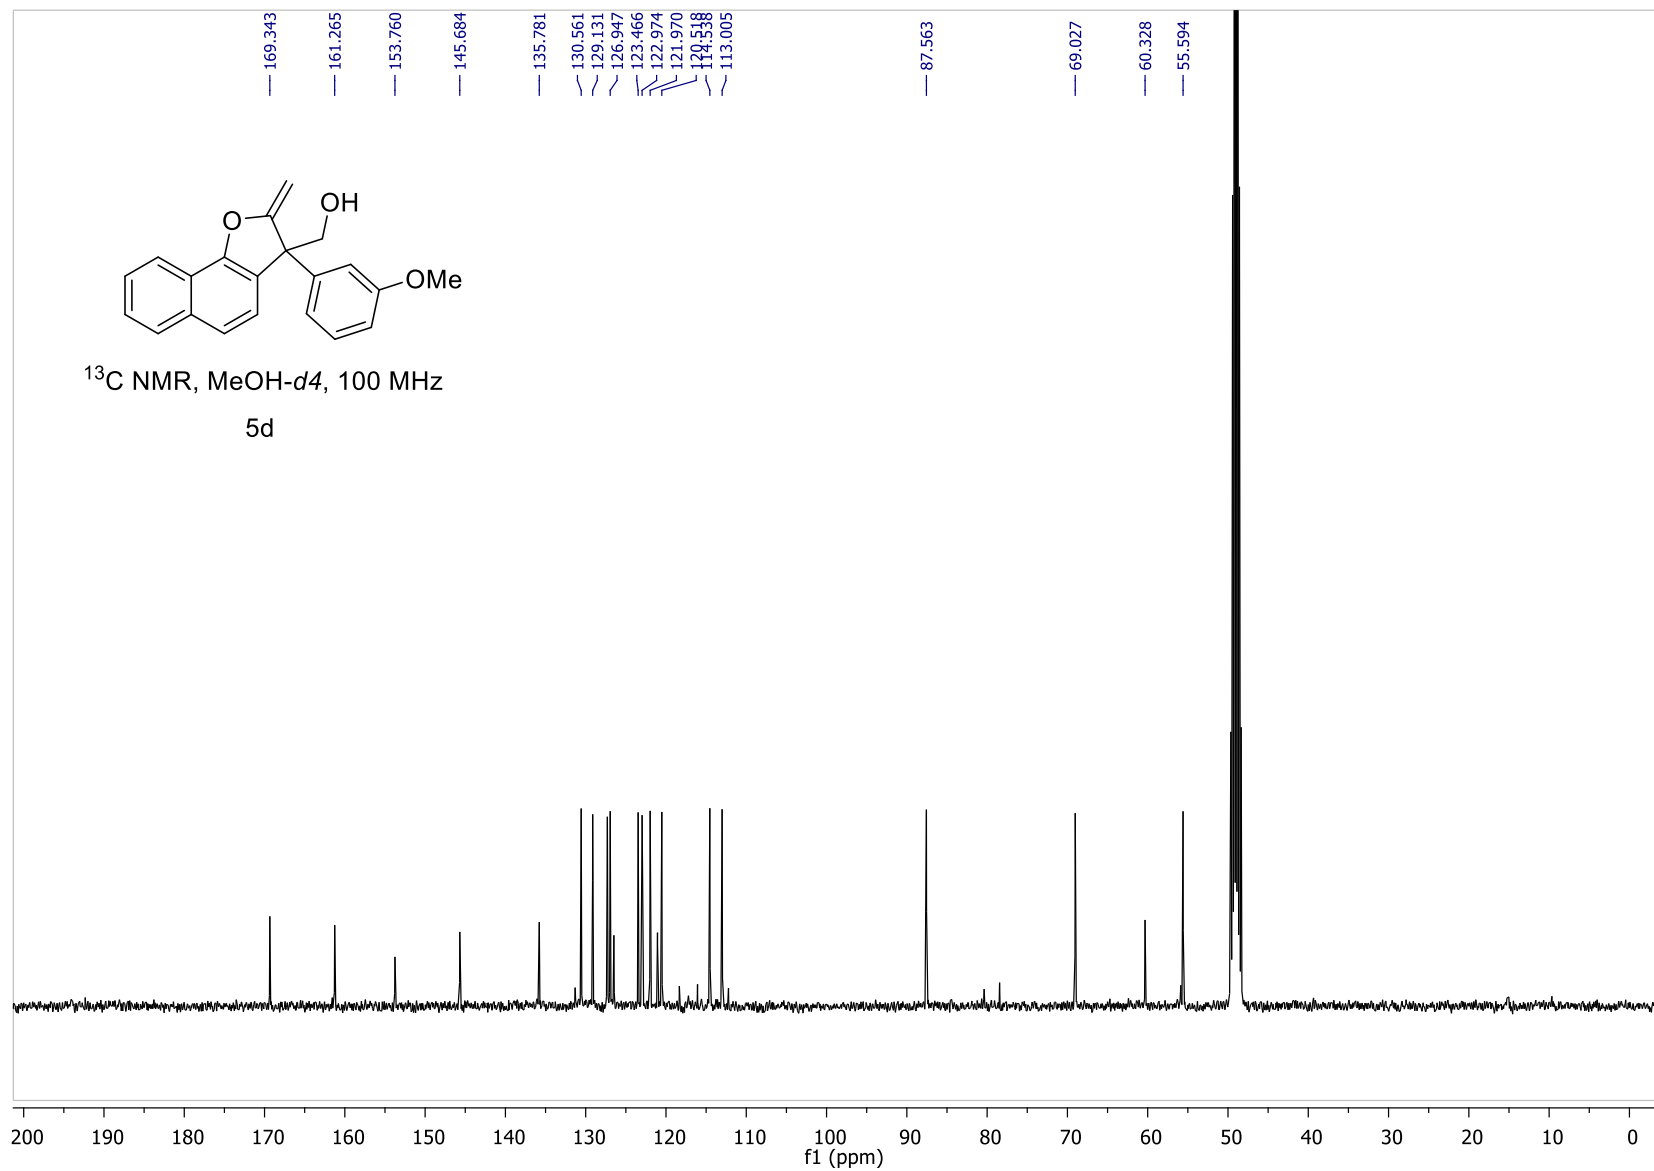



**(2-Methylene-3-(naphthalen-2-yl)-2,3-dihydro[1,2-b]furan-3-yl)methanol (5e)**

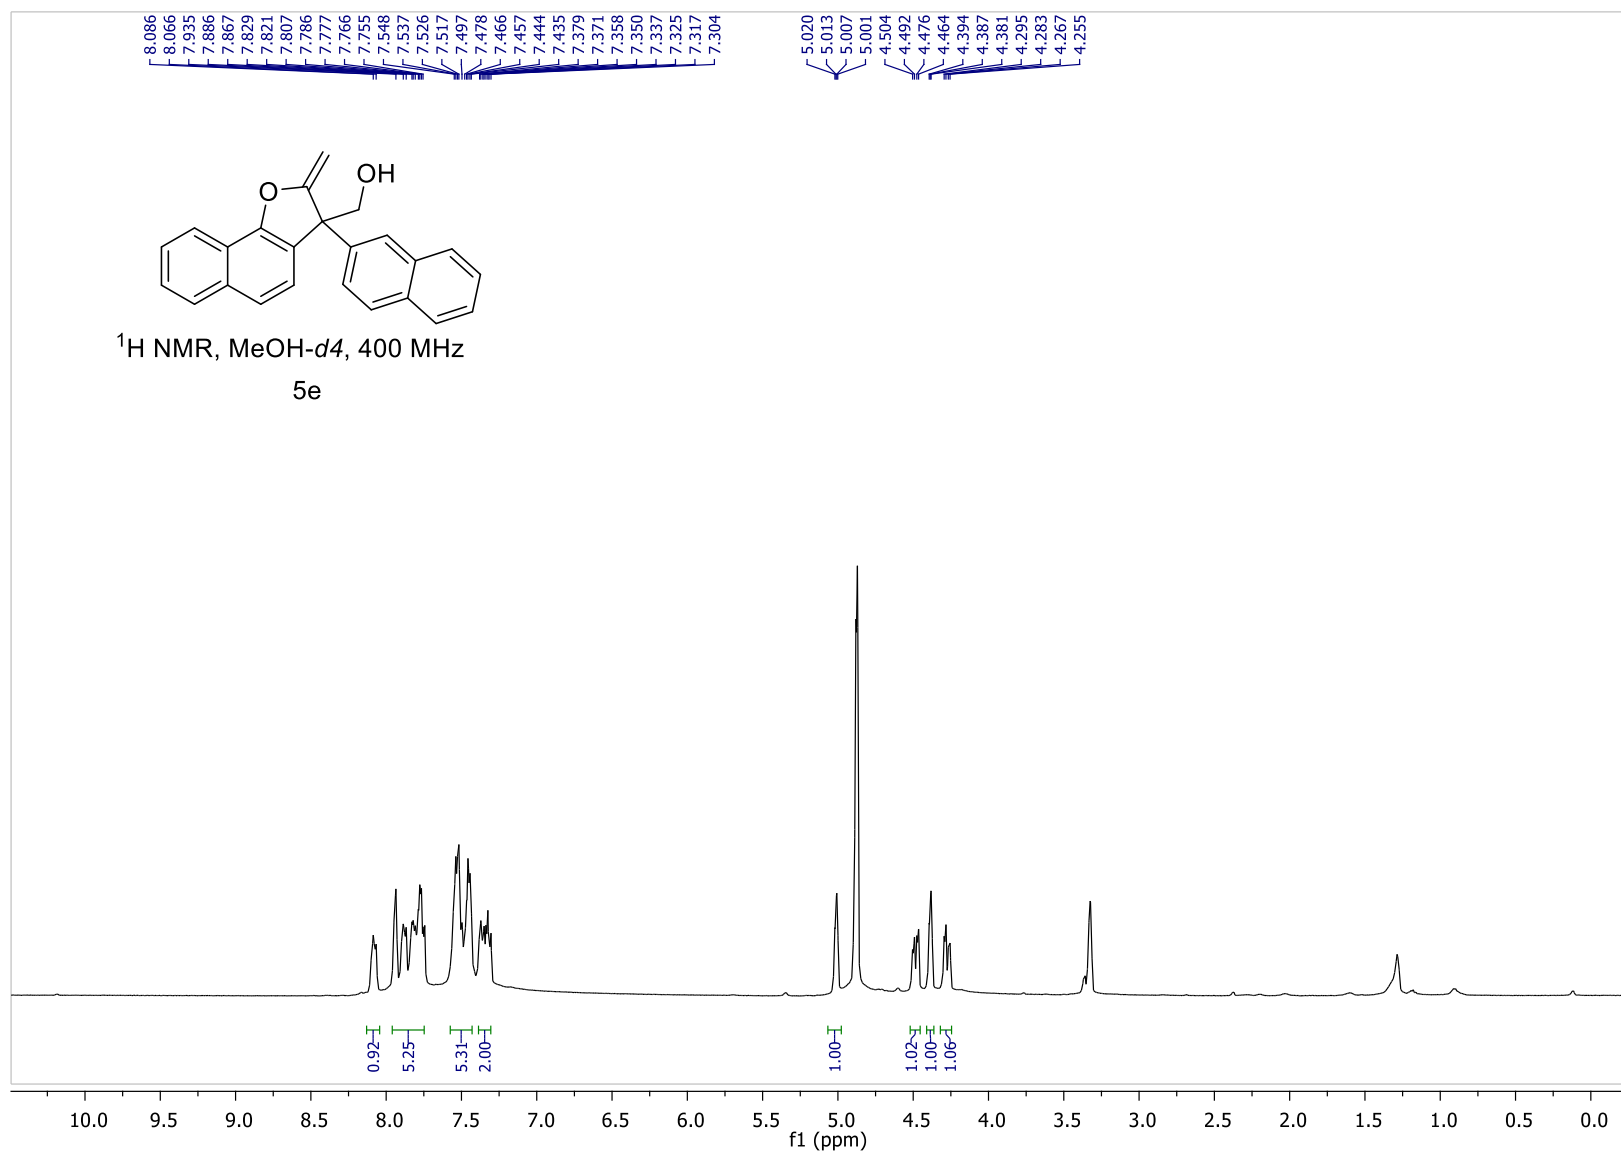

**(2-Methylene-3-(naphthalen-2-yl)-2,3-dihydro[1,2-b]furan-3-yl)methanol (5e)**

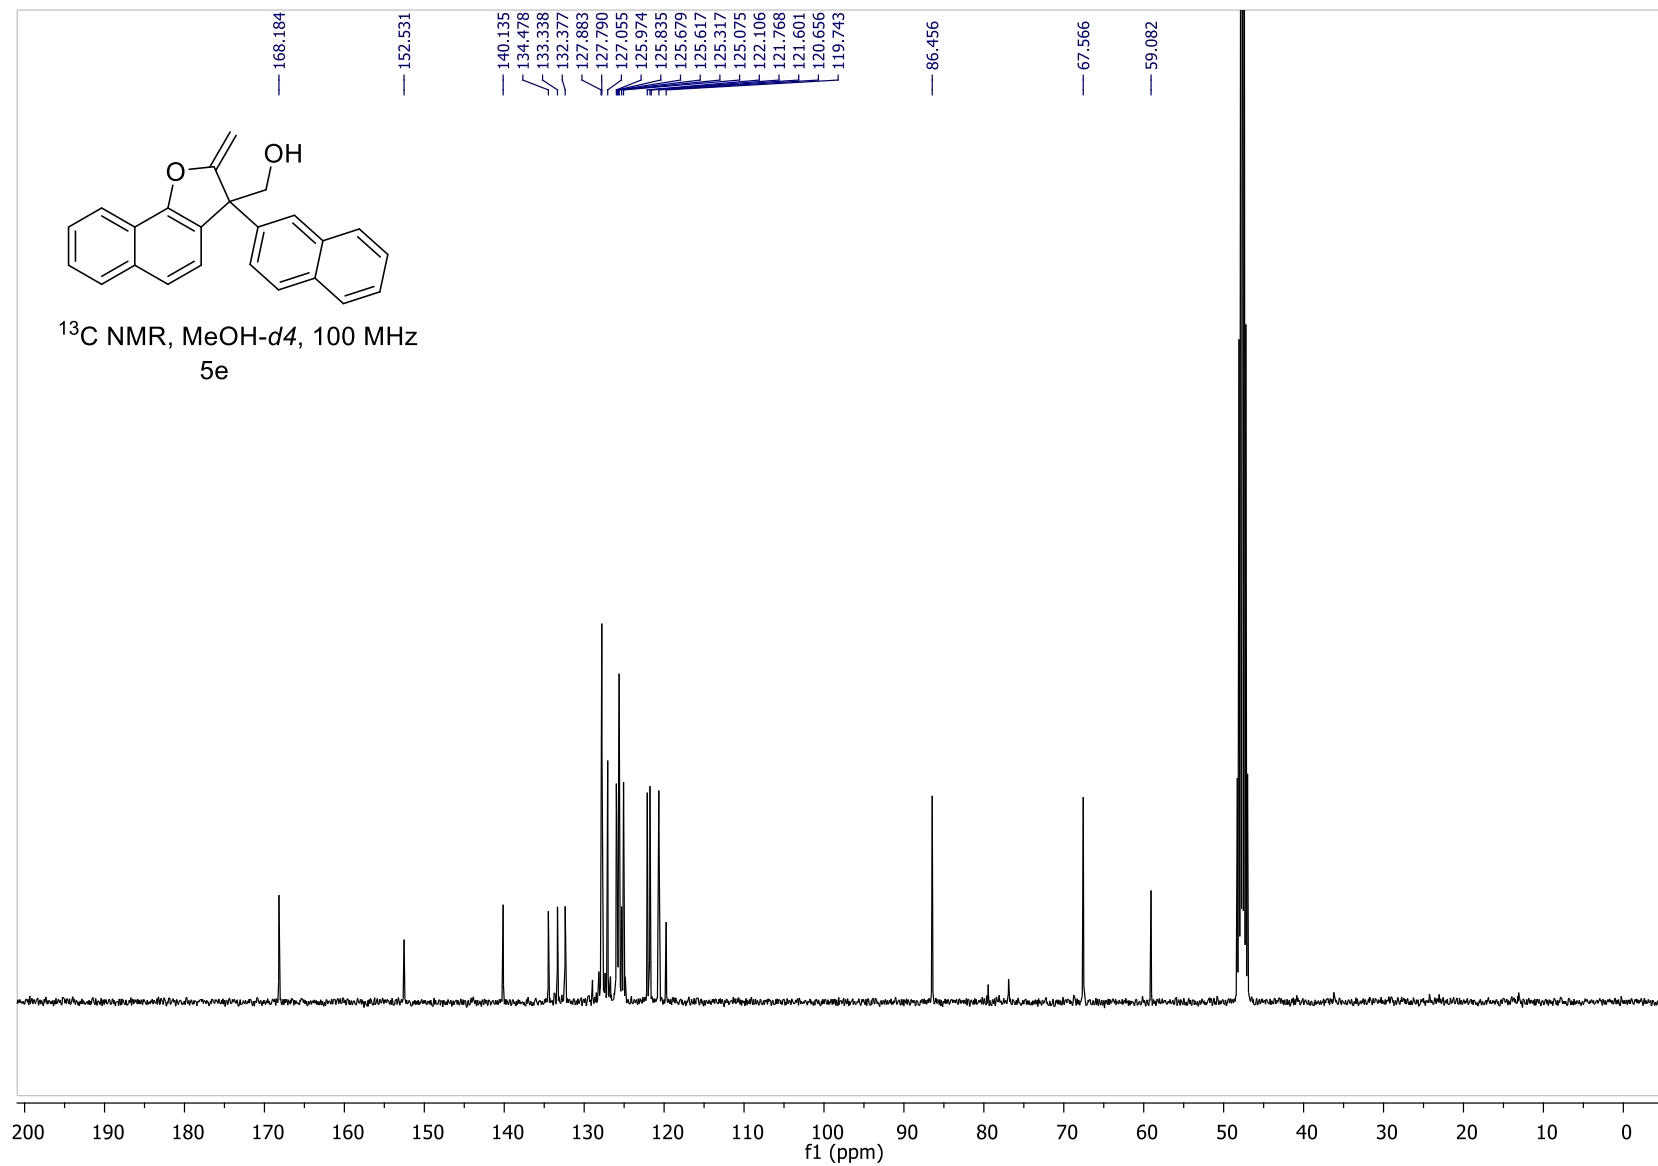

**(7-Methoxy-2-methylene-3-phenyl-2,3-dihydro[1,2-b]furan-3-yl)methanol (5f)**

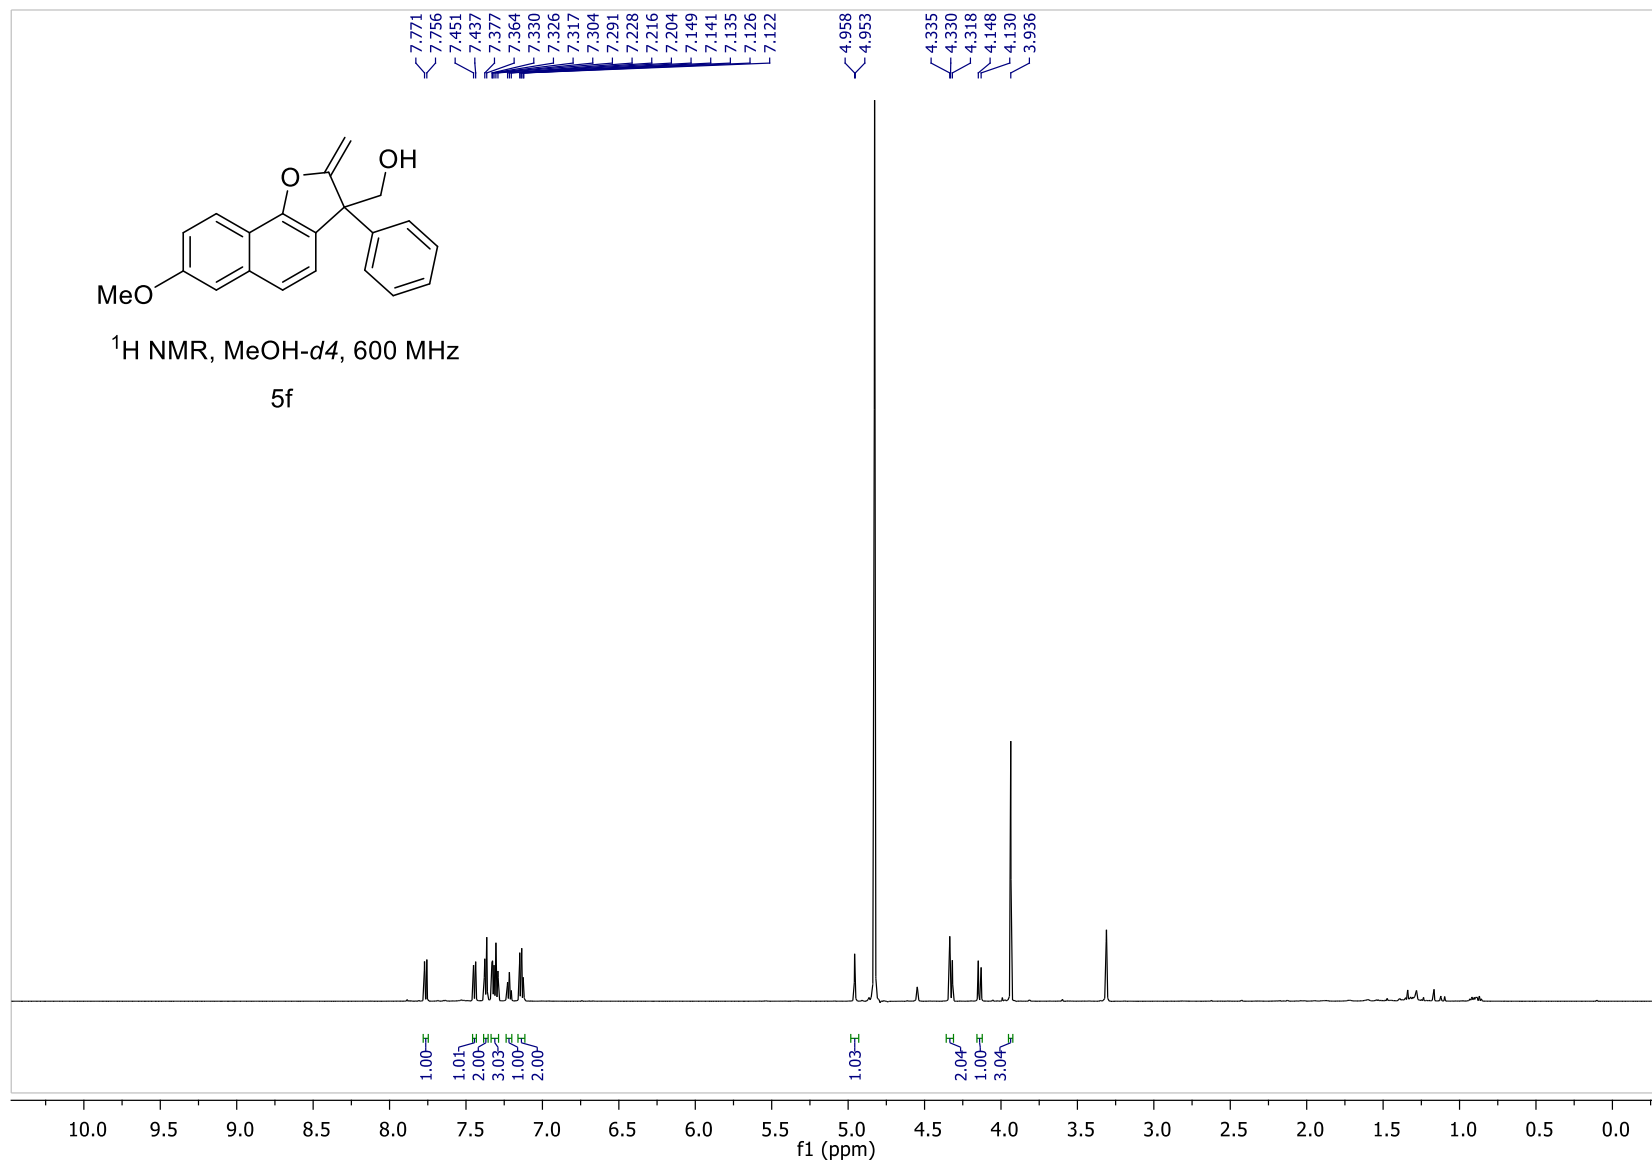

**(7-Methoxy-2-methylene-3-phenyl-2,3-dihydro[1,2-b]furan-3-yl)methanol (5f)**

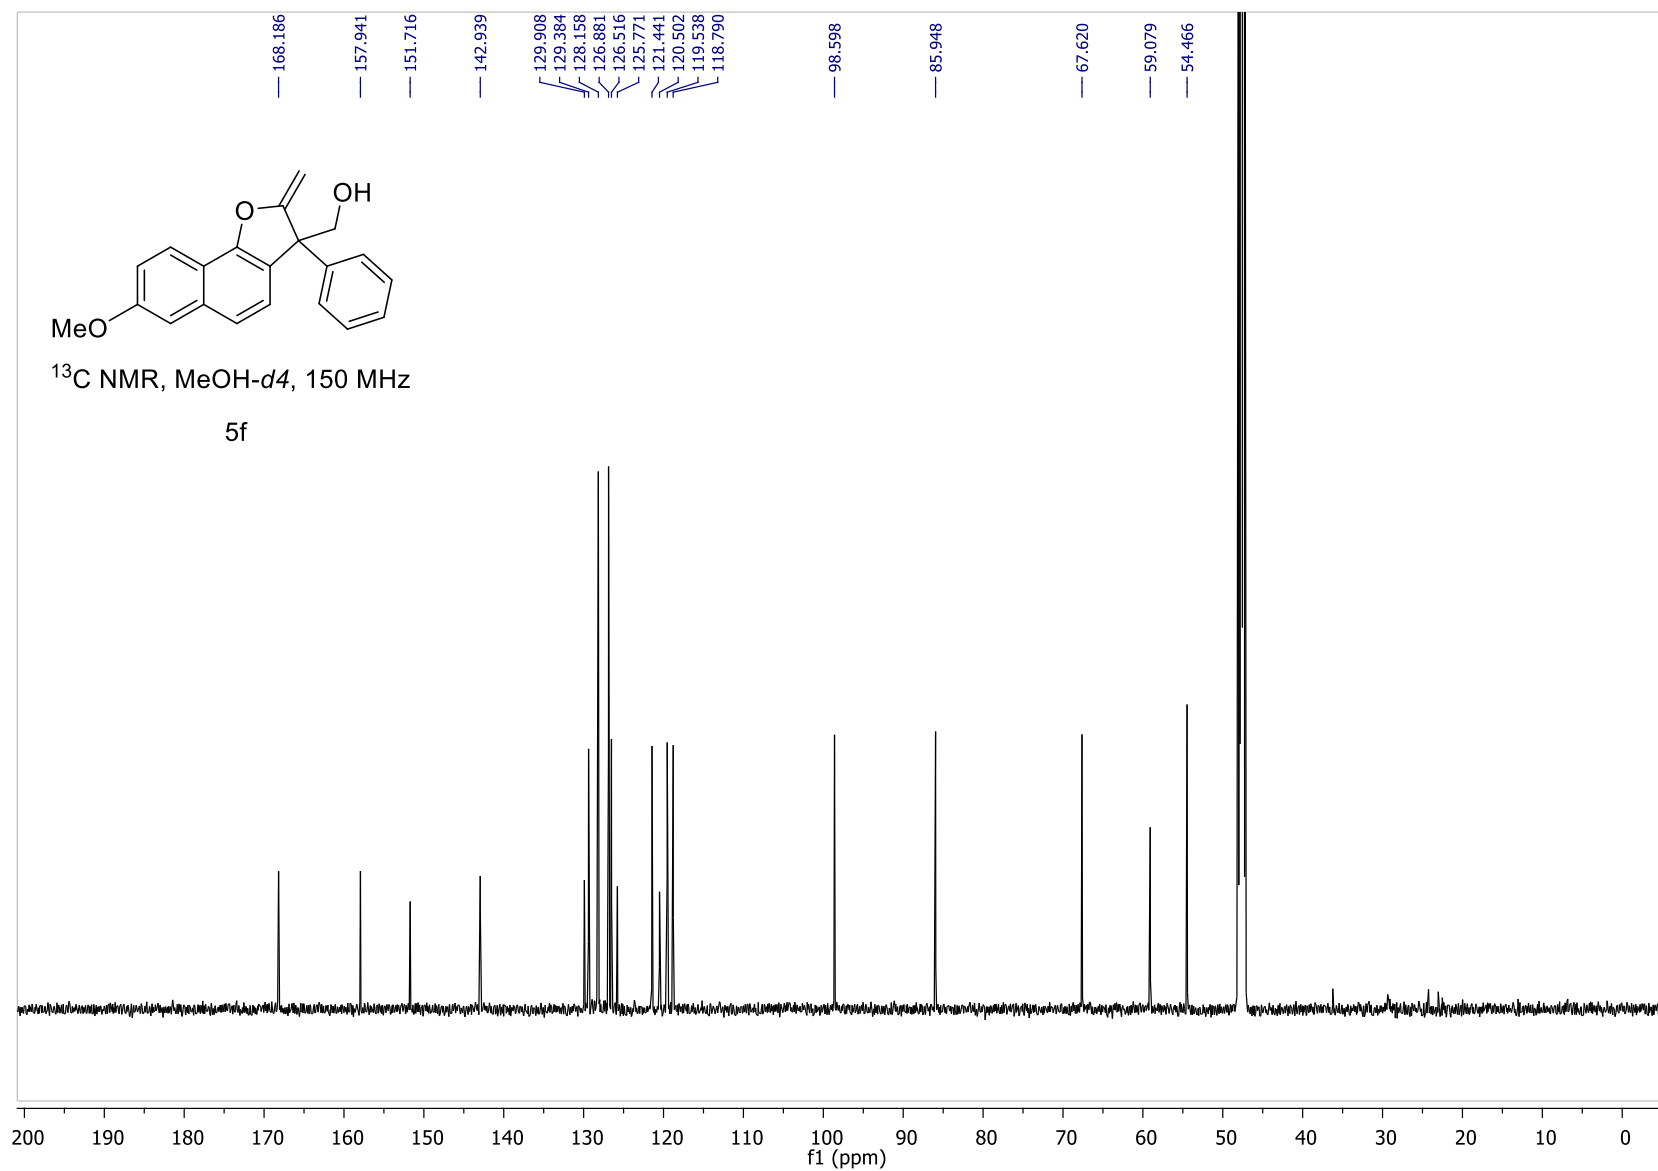

**(8-Methoxy-2-methylene-3-(naphthalen-2-yl)-2,3-dihydrofuran-3-yl)methanol (5g)**

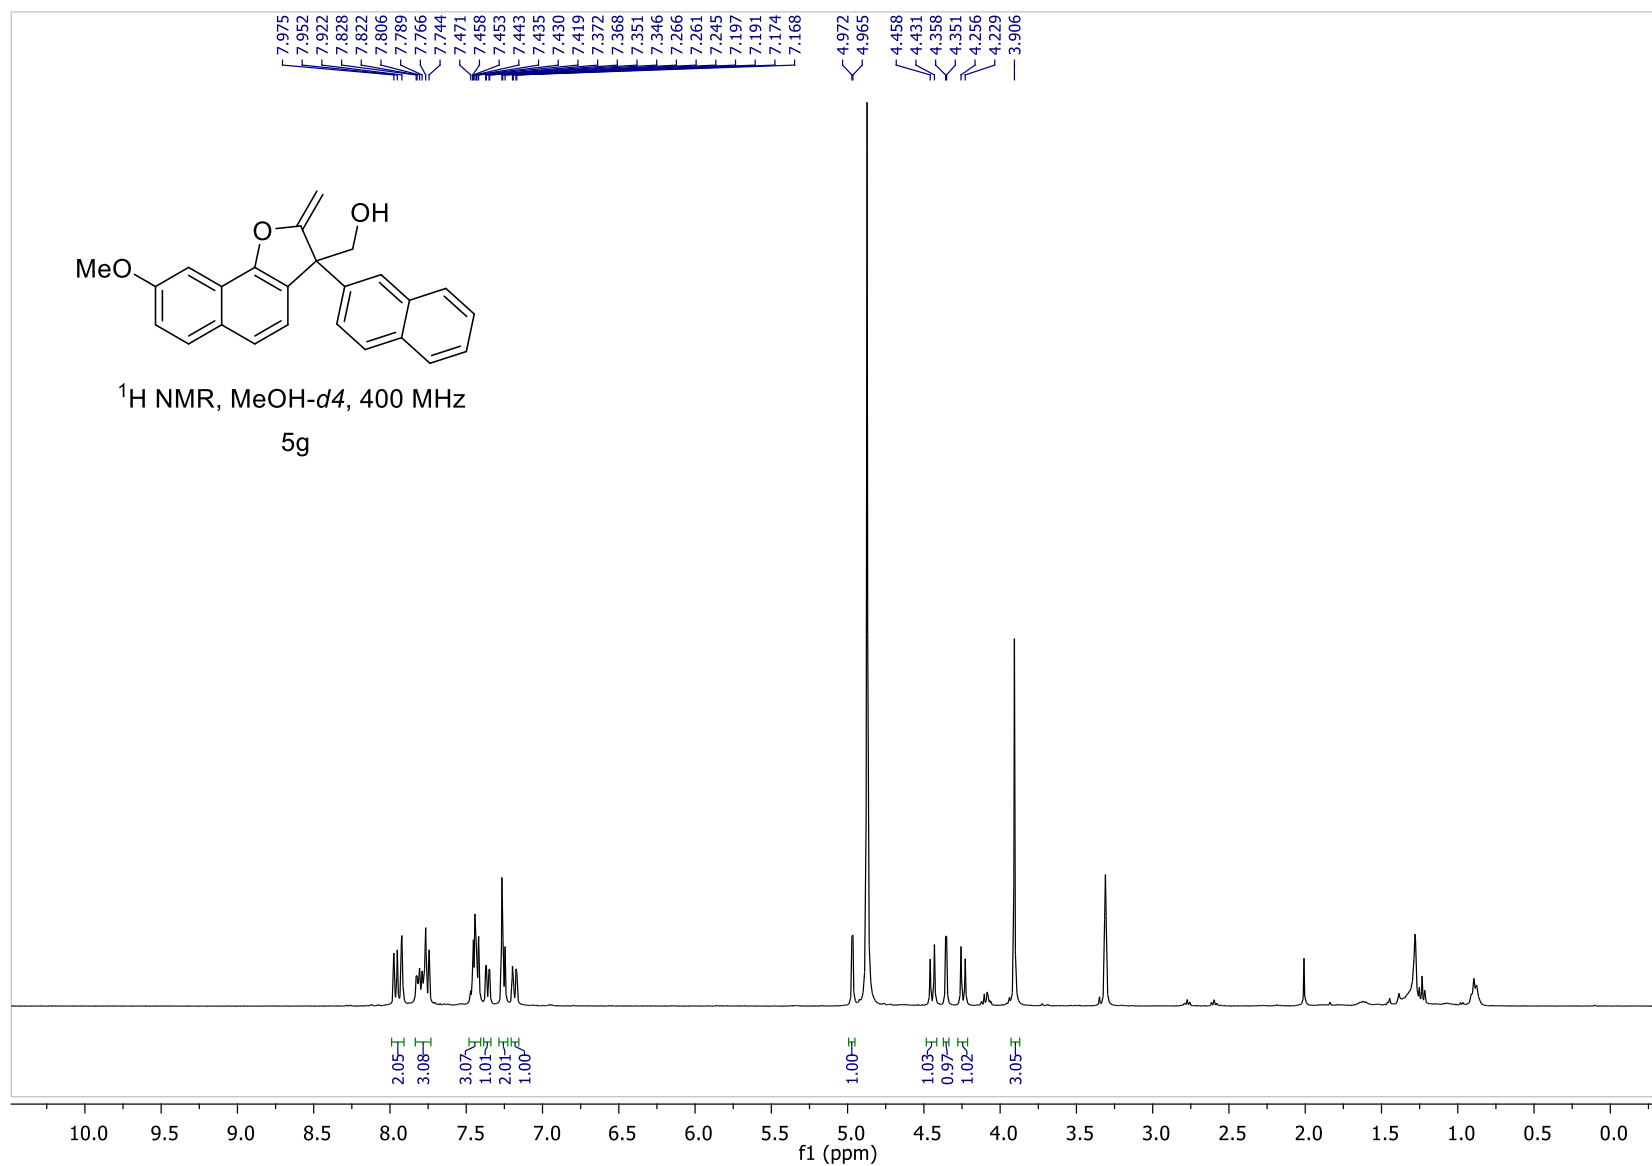

**(8-Methoxy-2-methylene-3-(naphthalen-2-yl)-2,3-dihydrofuran-3-yl)methanol (5g)**

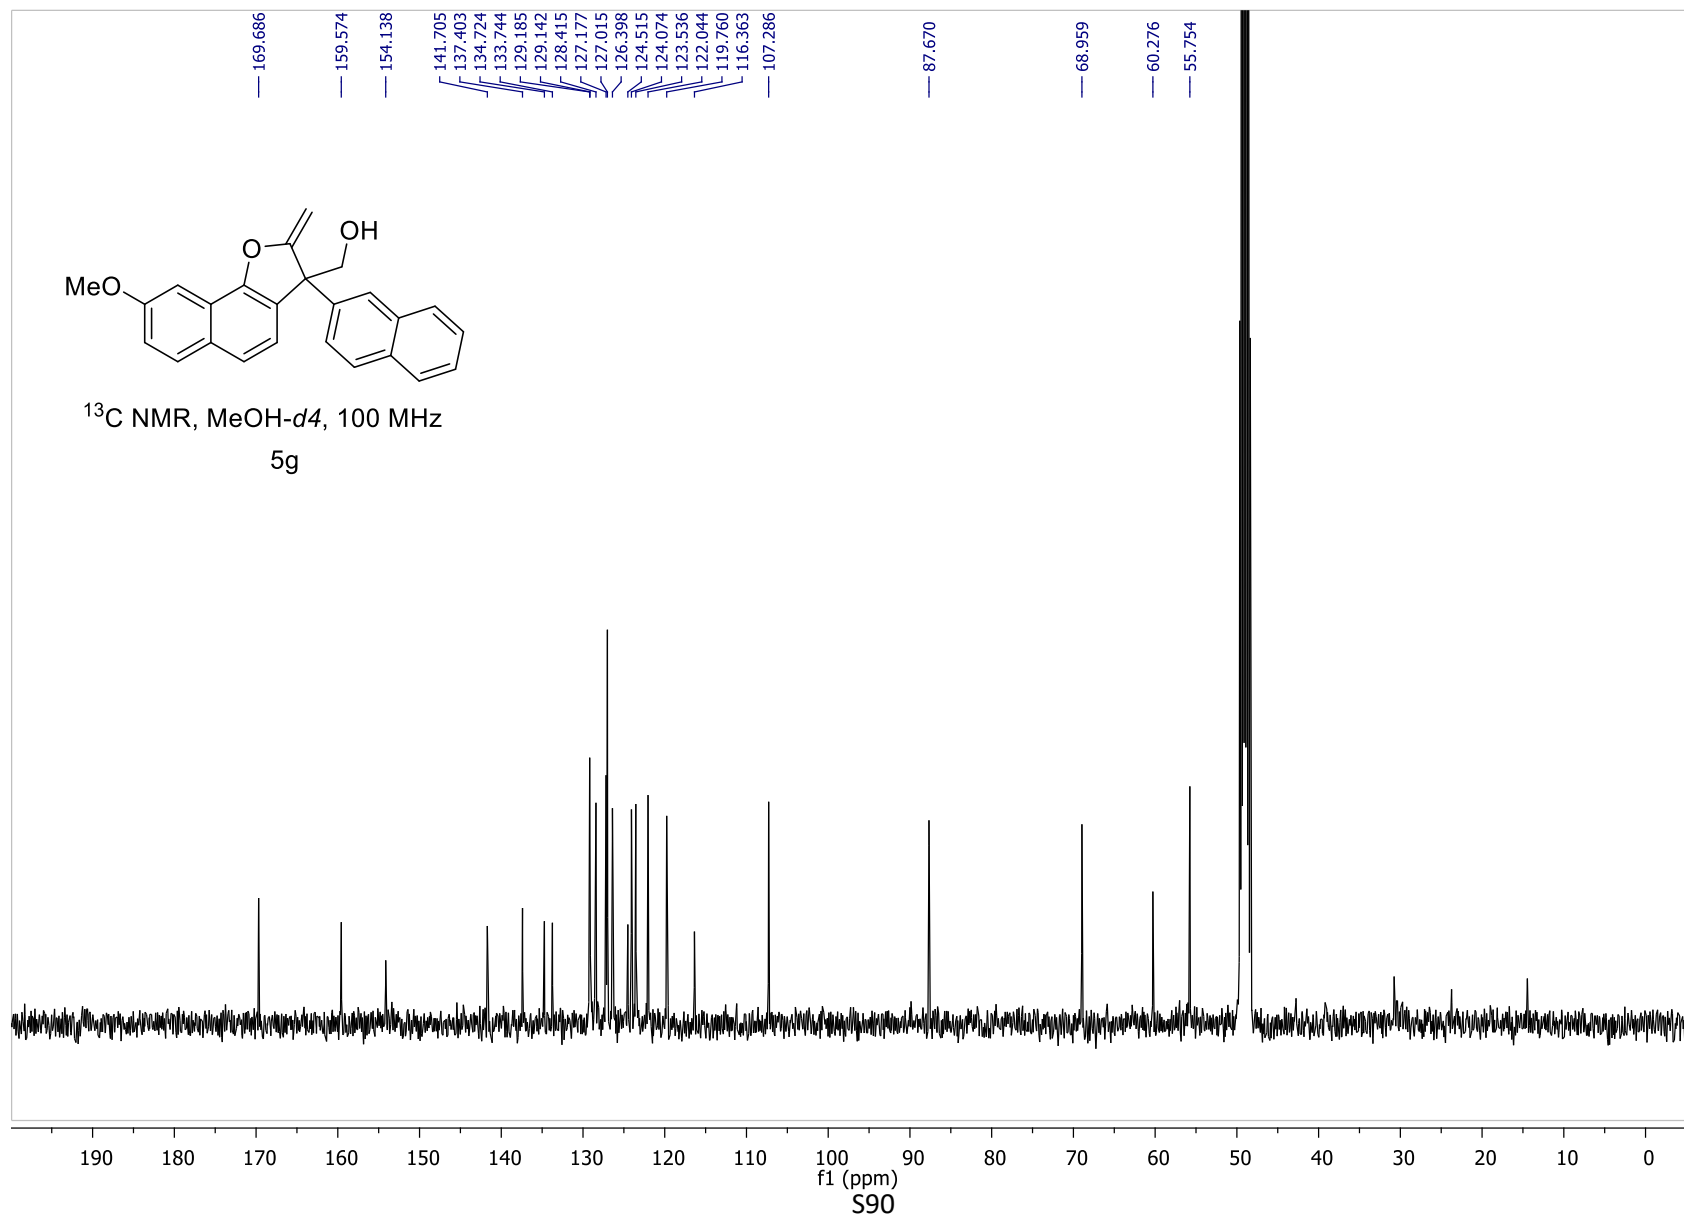

**(8-Fluoro-2-methylene-3-(naphthalen-2-yl)-2,3-dihydrophtho[1,2-*b*]furan-3-yl)methanol (5h)**

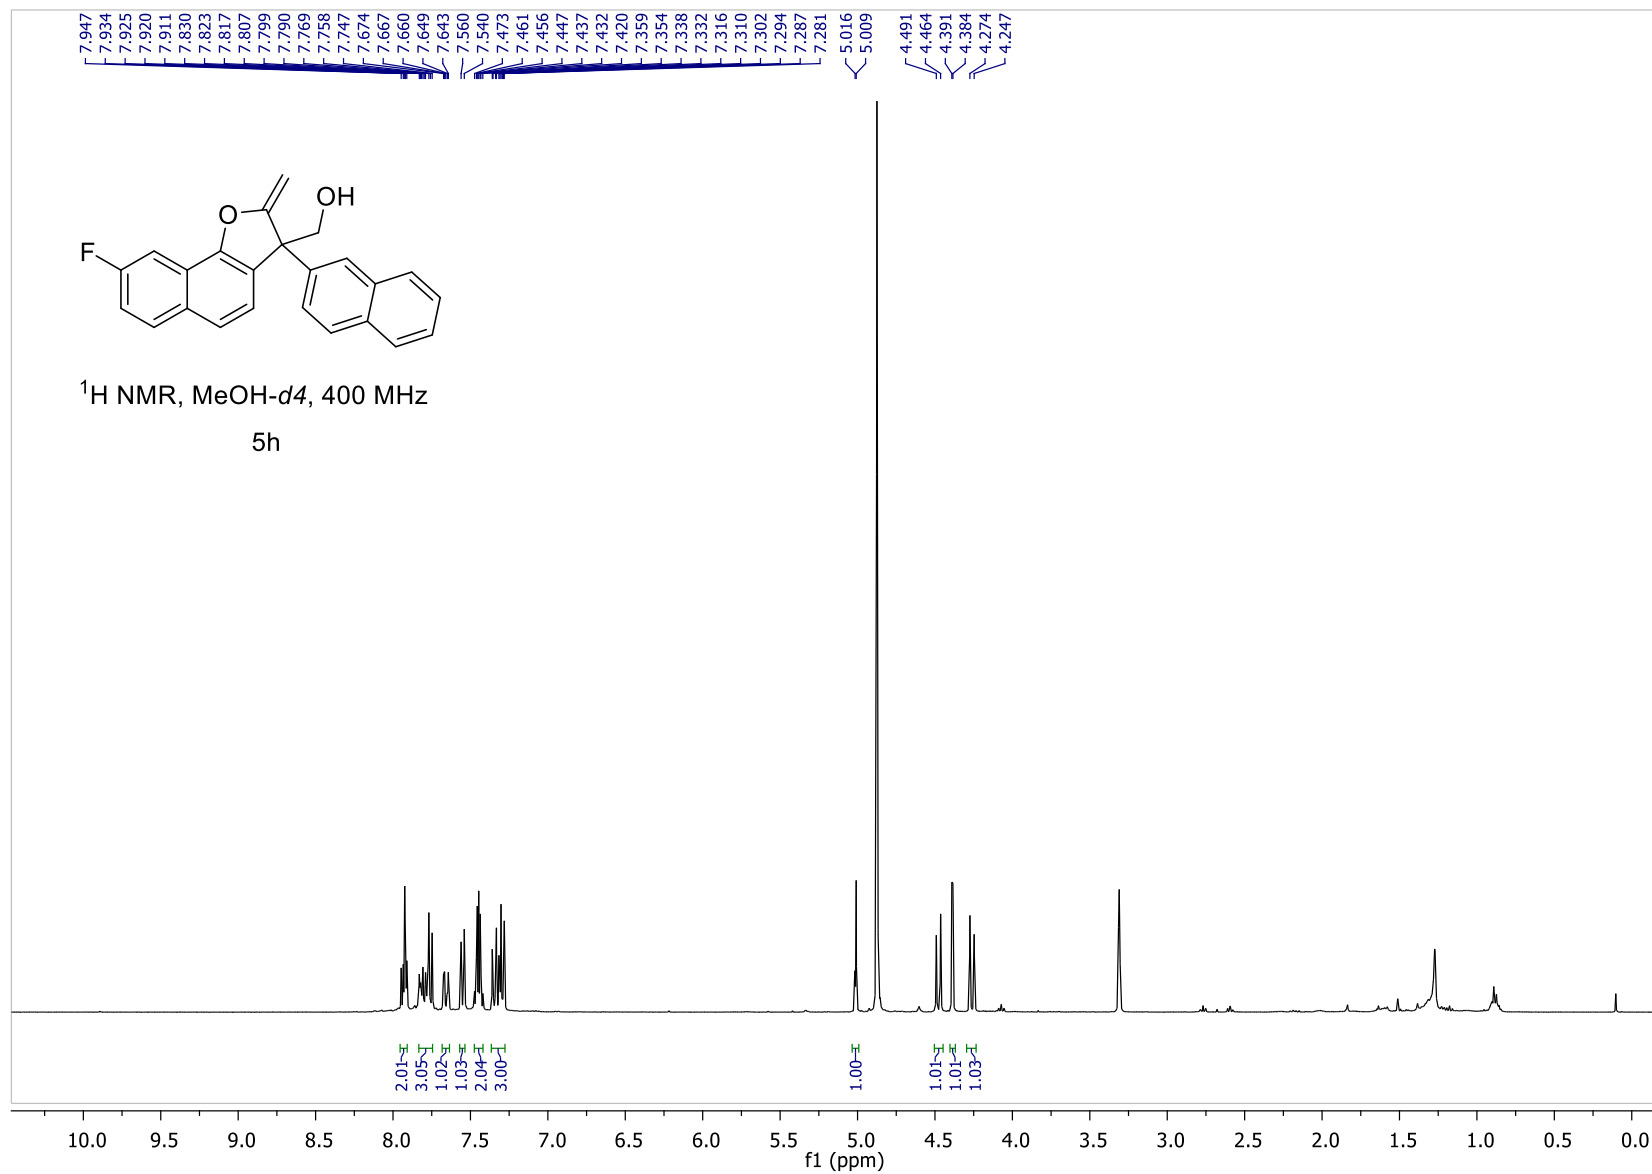

**(8-Fluoro-2-methylene-3-(naphthalen-2-yl)-2,3-dihydrophtho[1,2-*b*]furan-3-yl)methanol (5h)**

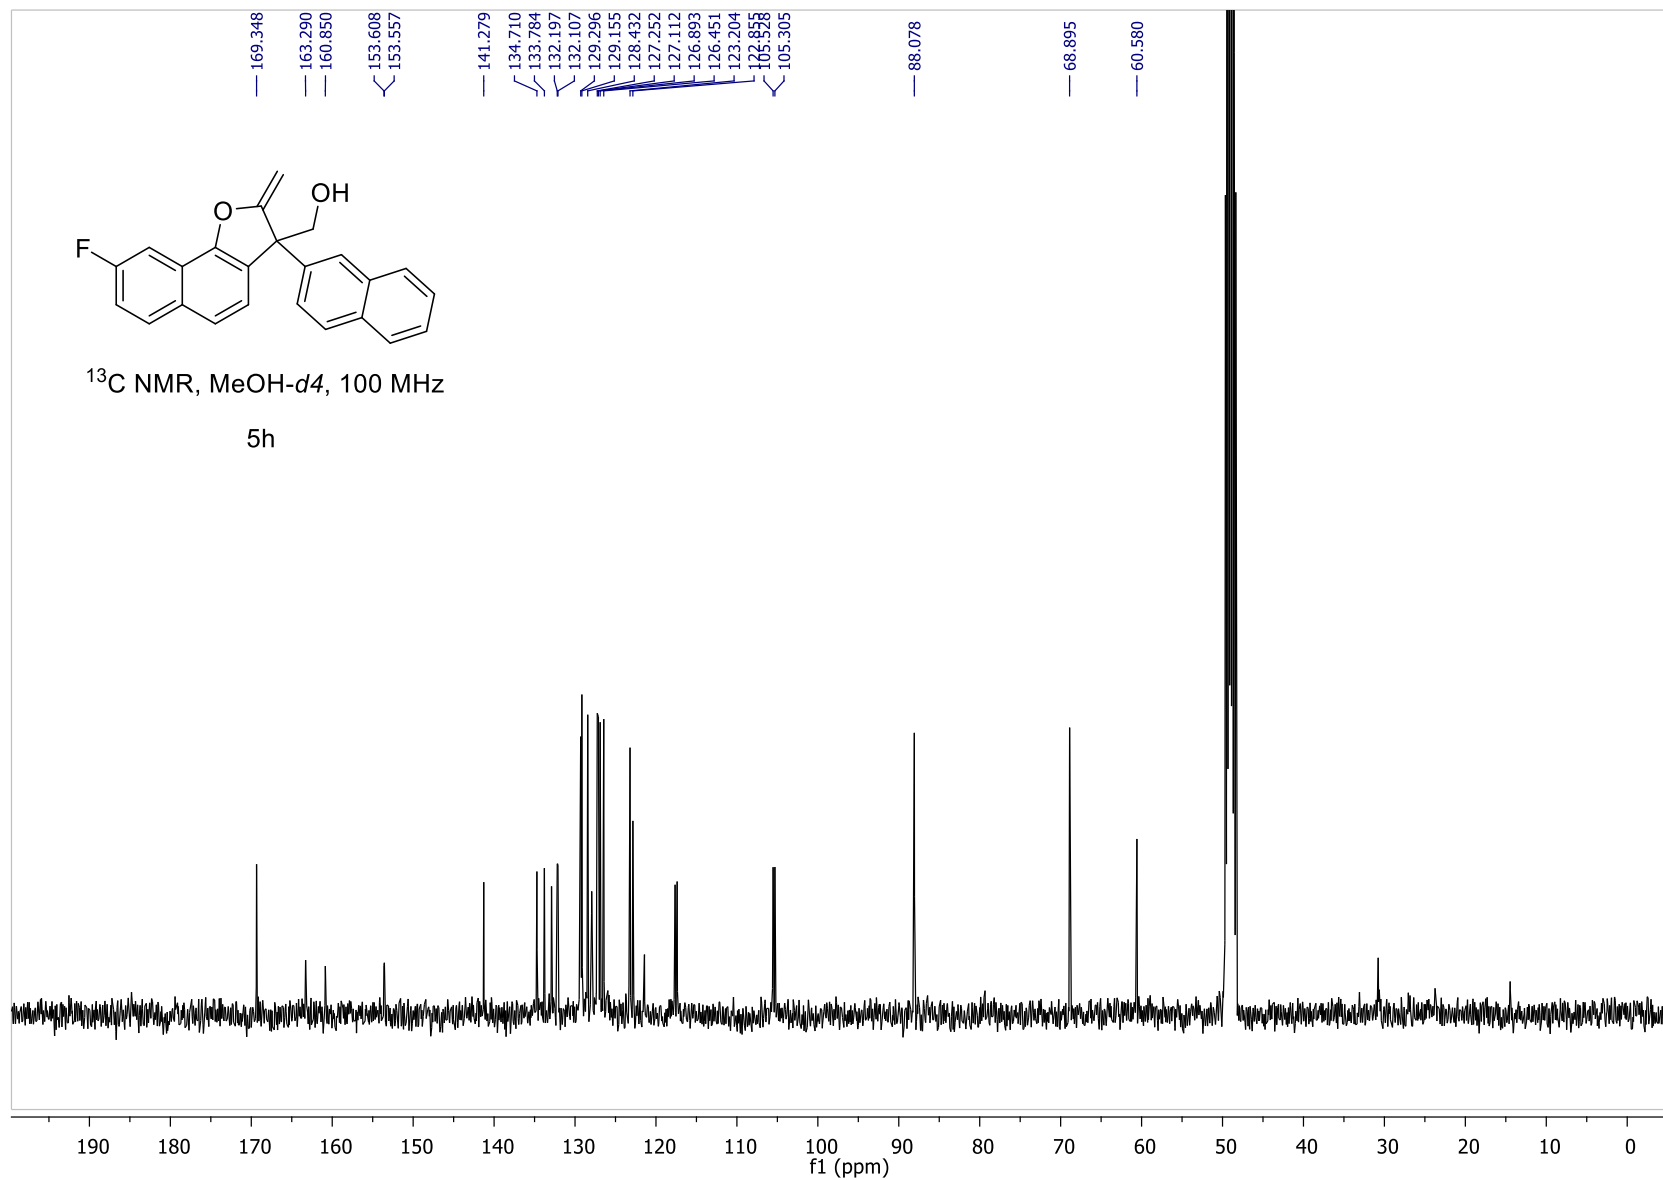



**(8-Fluoro-2-methylene-3-(naphthalen-2-yl)-2,3-dihydro[1,2-b]furan-3-yl)methanol (5h)**

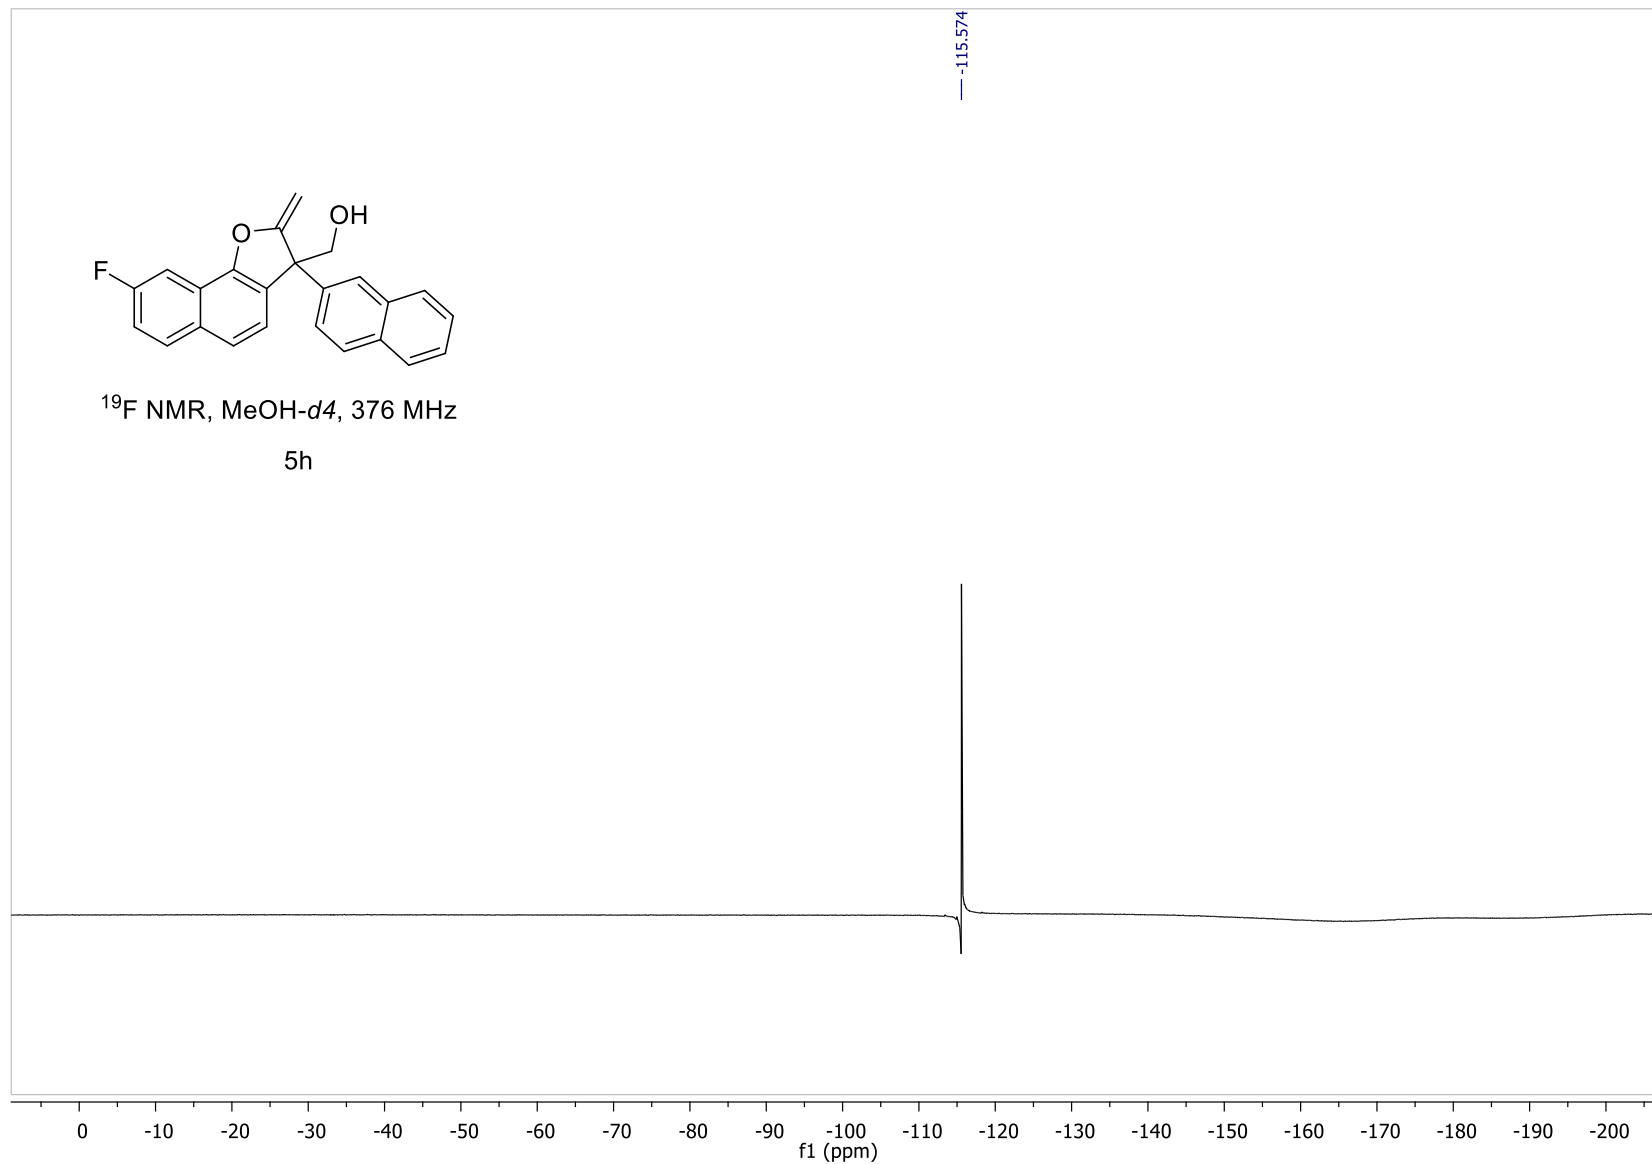

(7-Methoxy-2-methylene-3-(naphthalen-2-yl)-2,3-dihydro[1,2-*b*]furan-3-yl)methanol (5i)

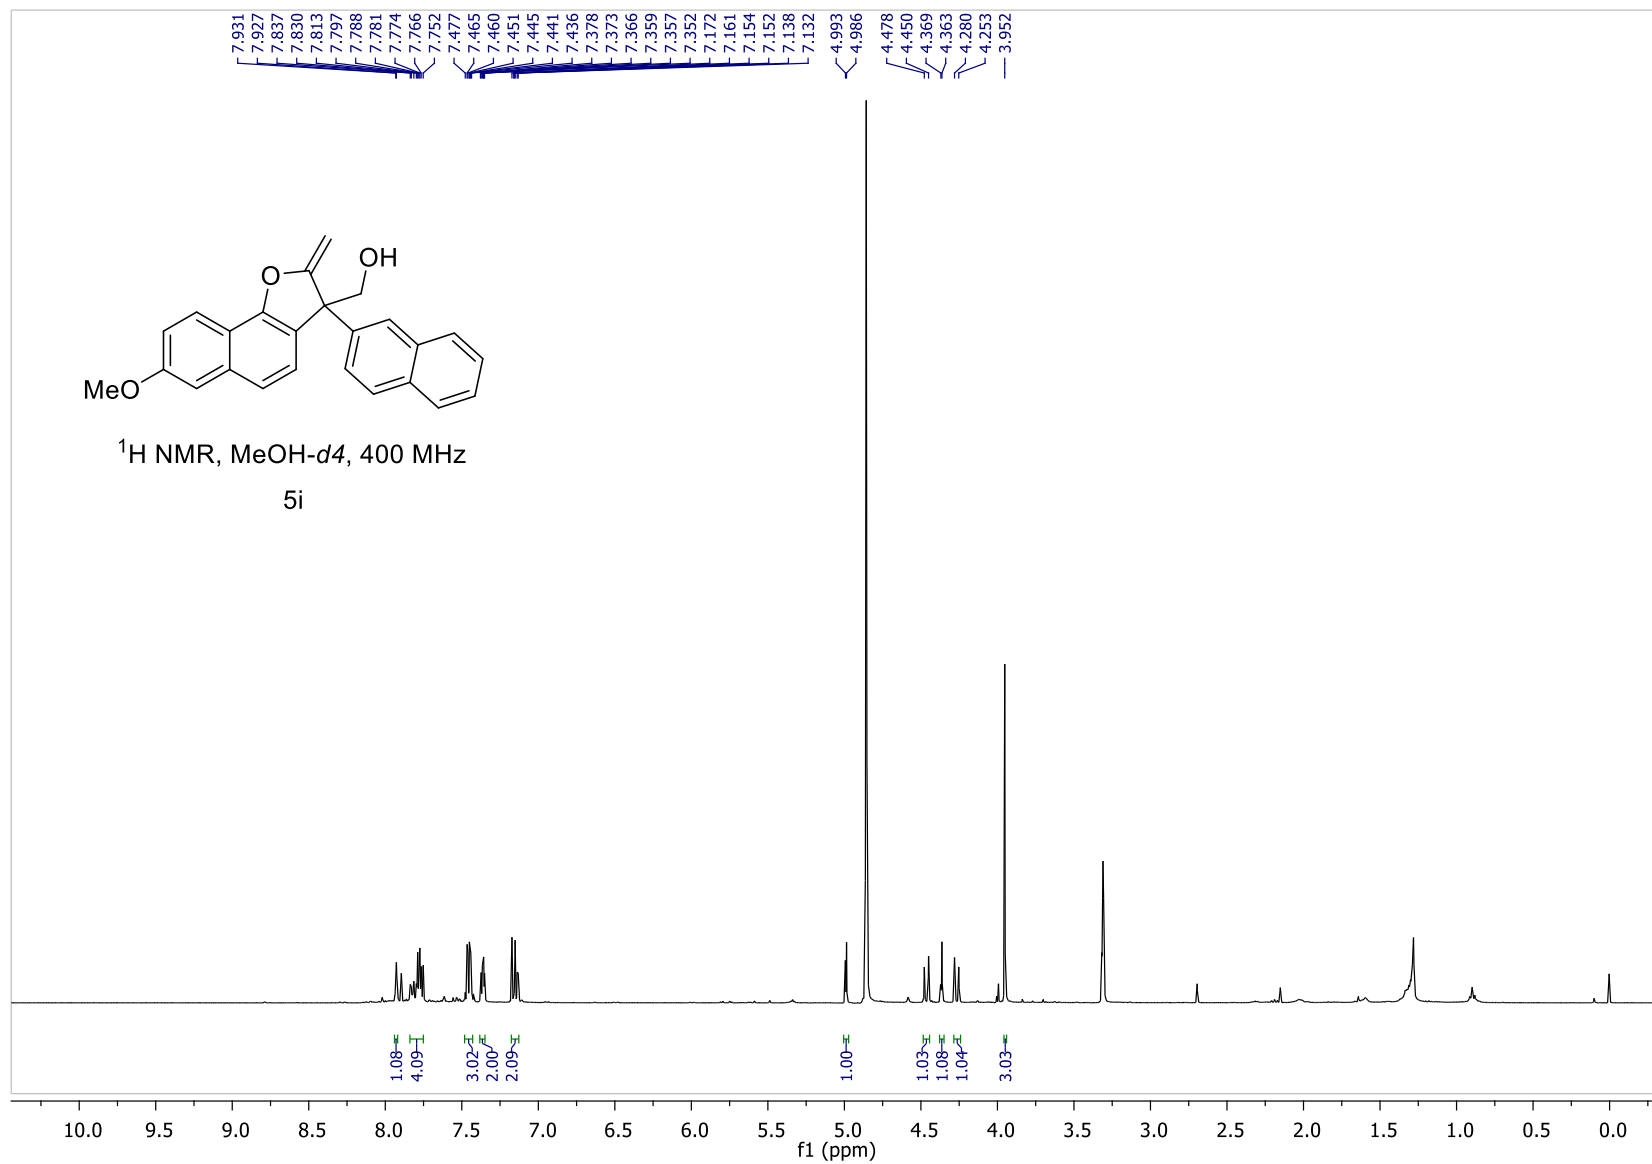

**(7-Methoxy-2-methylene-3-(naphthalen-2-yl)-2,3-dihydro[1,2-b]furan-3-yl)methanol (5i)**

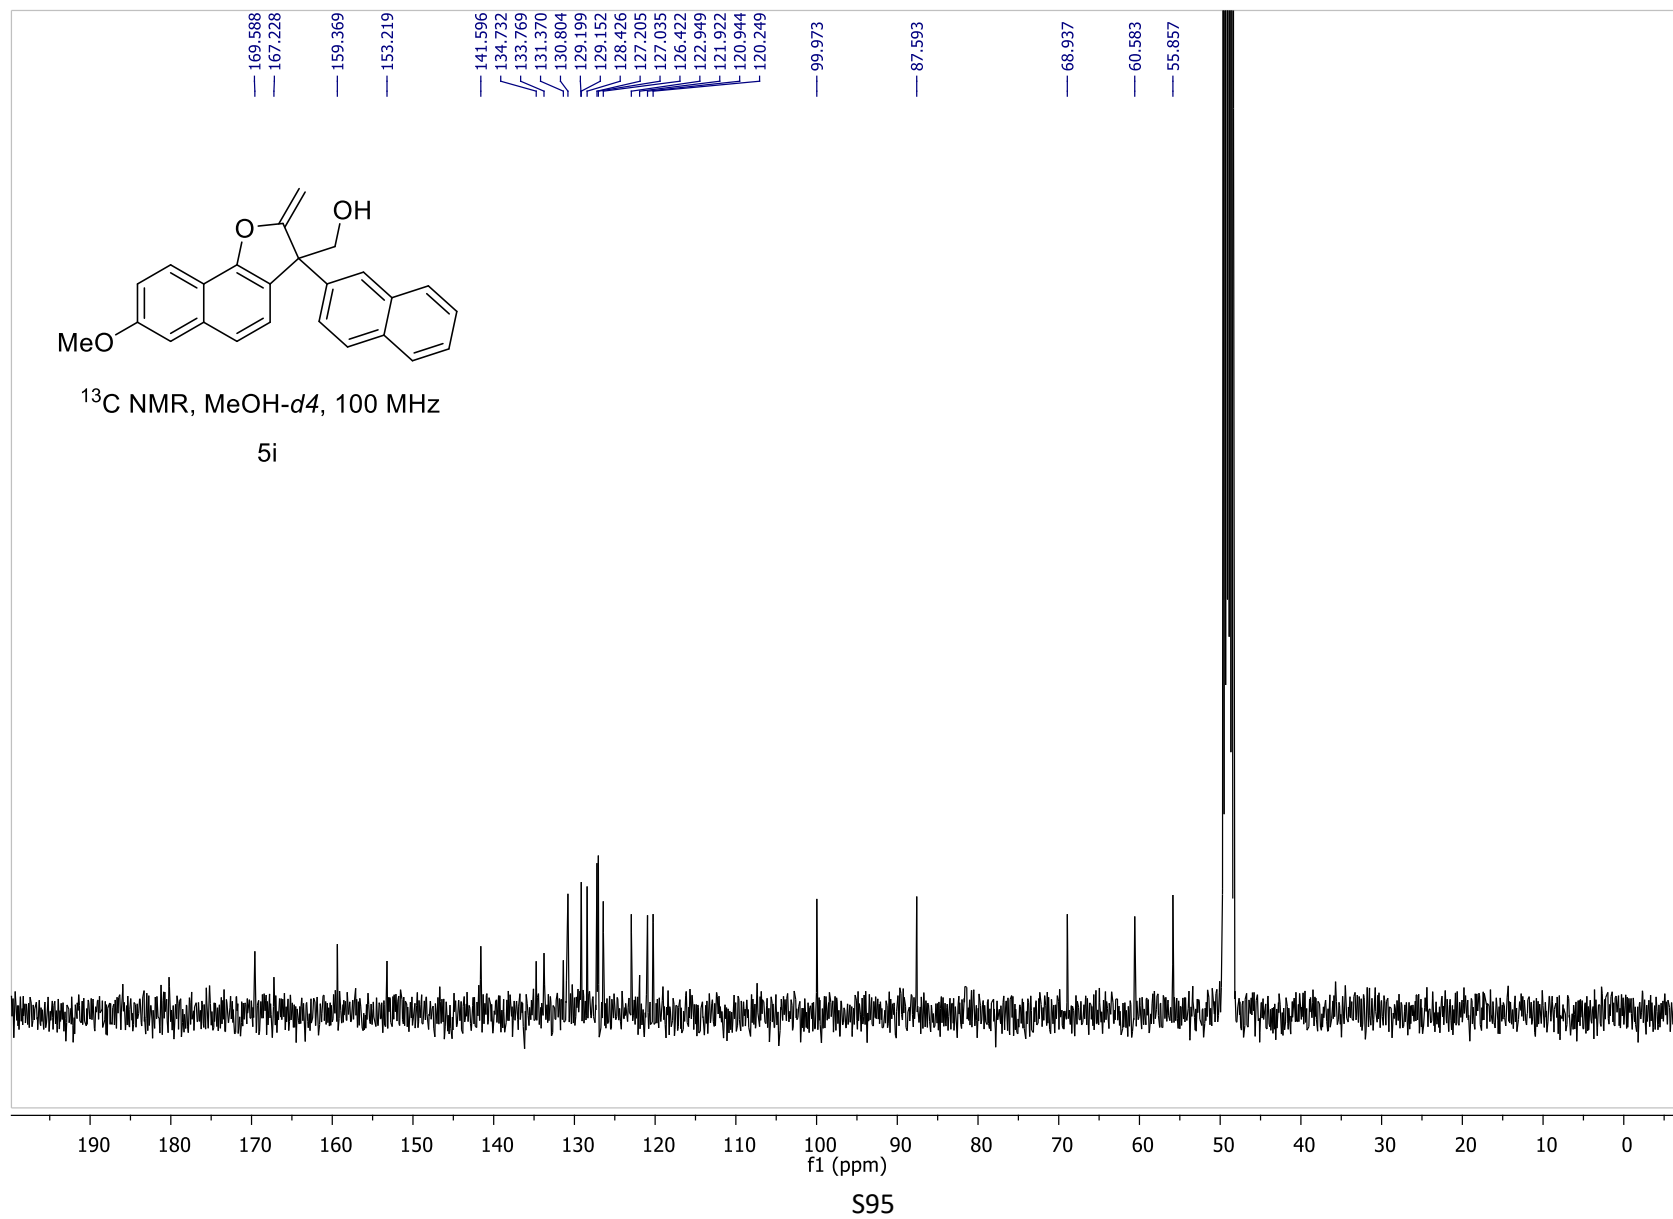

4-Methyl-N-((2-methylene-3-phenyl-2,3-dihydrophtho[1,2-*b*]furan-3-yl)methyl)benzenesulfonamide (5j)

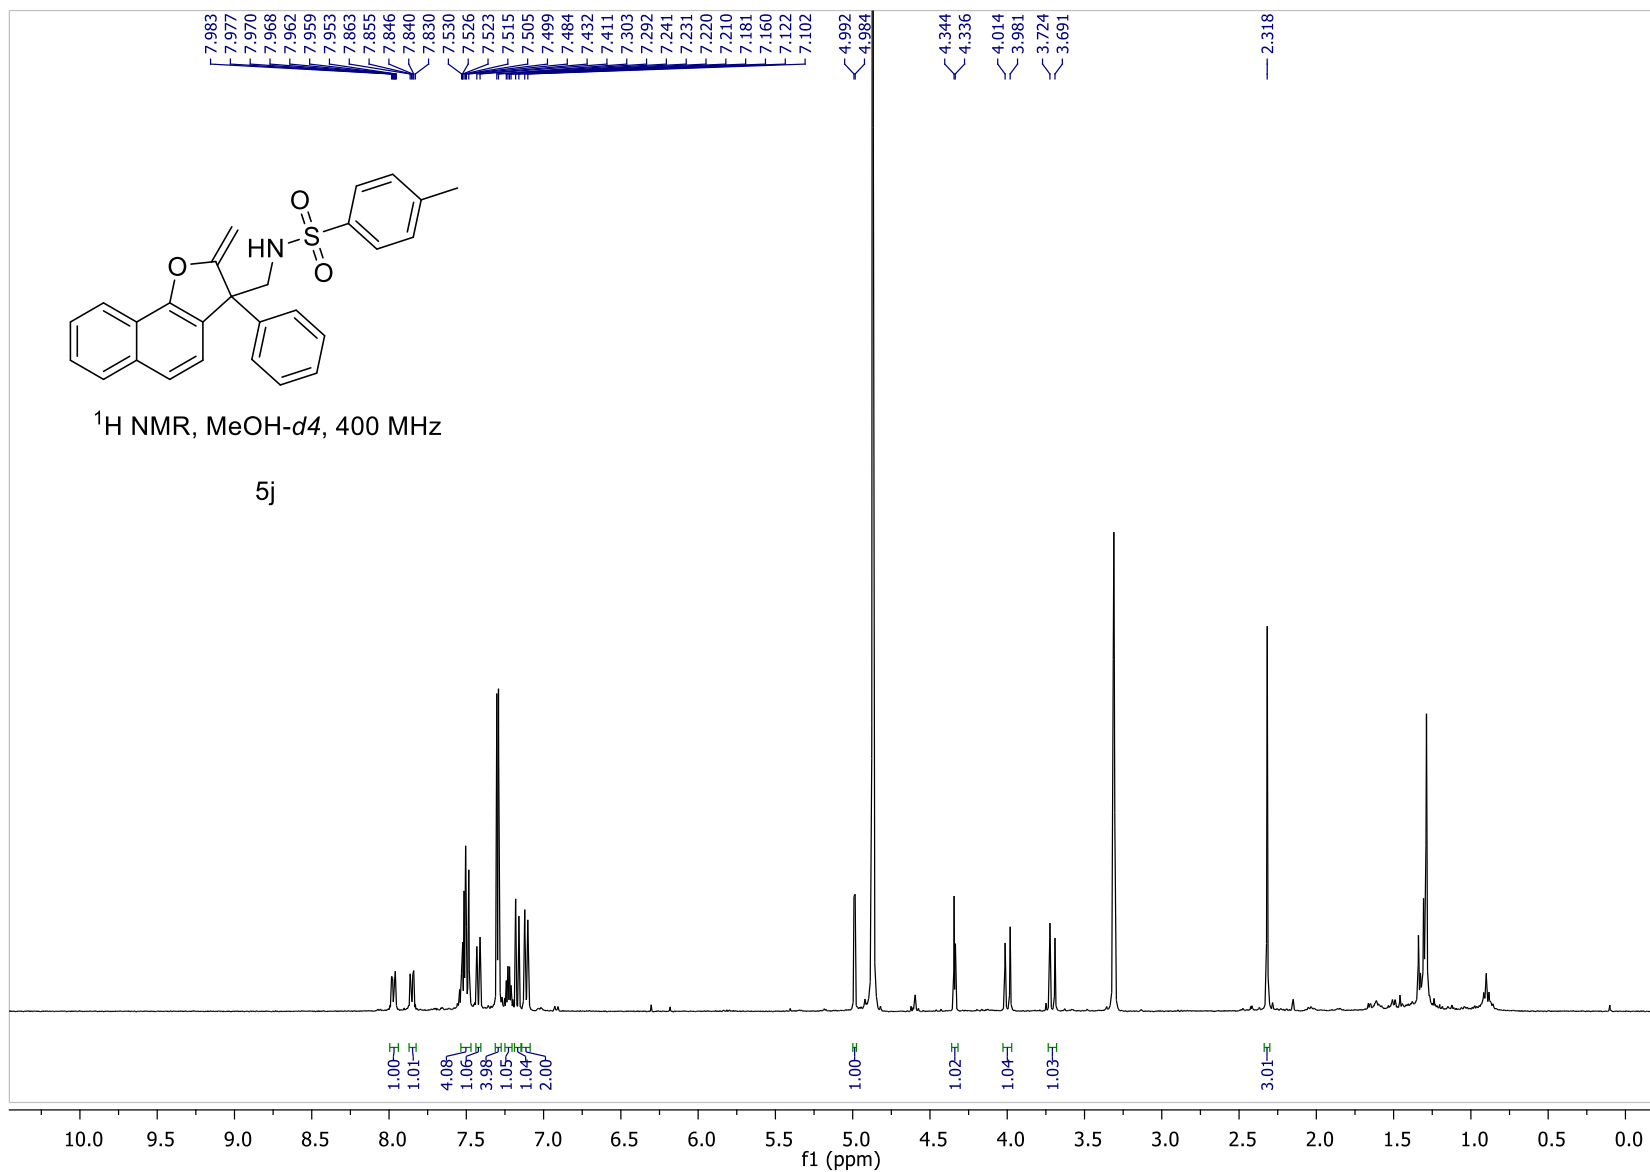

# 4-Methyl-N-((2-methylene-3-phenyl-2,3-dihydrophtho[1,2-*b*]furan-3-yl)methyl)benzenesulfonamide (5j)

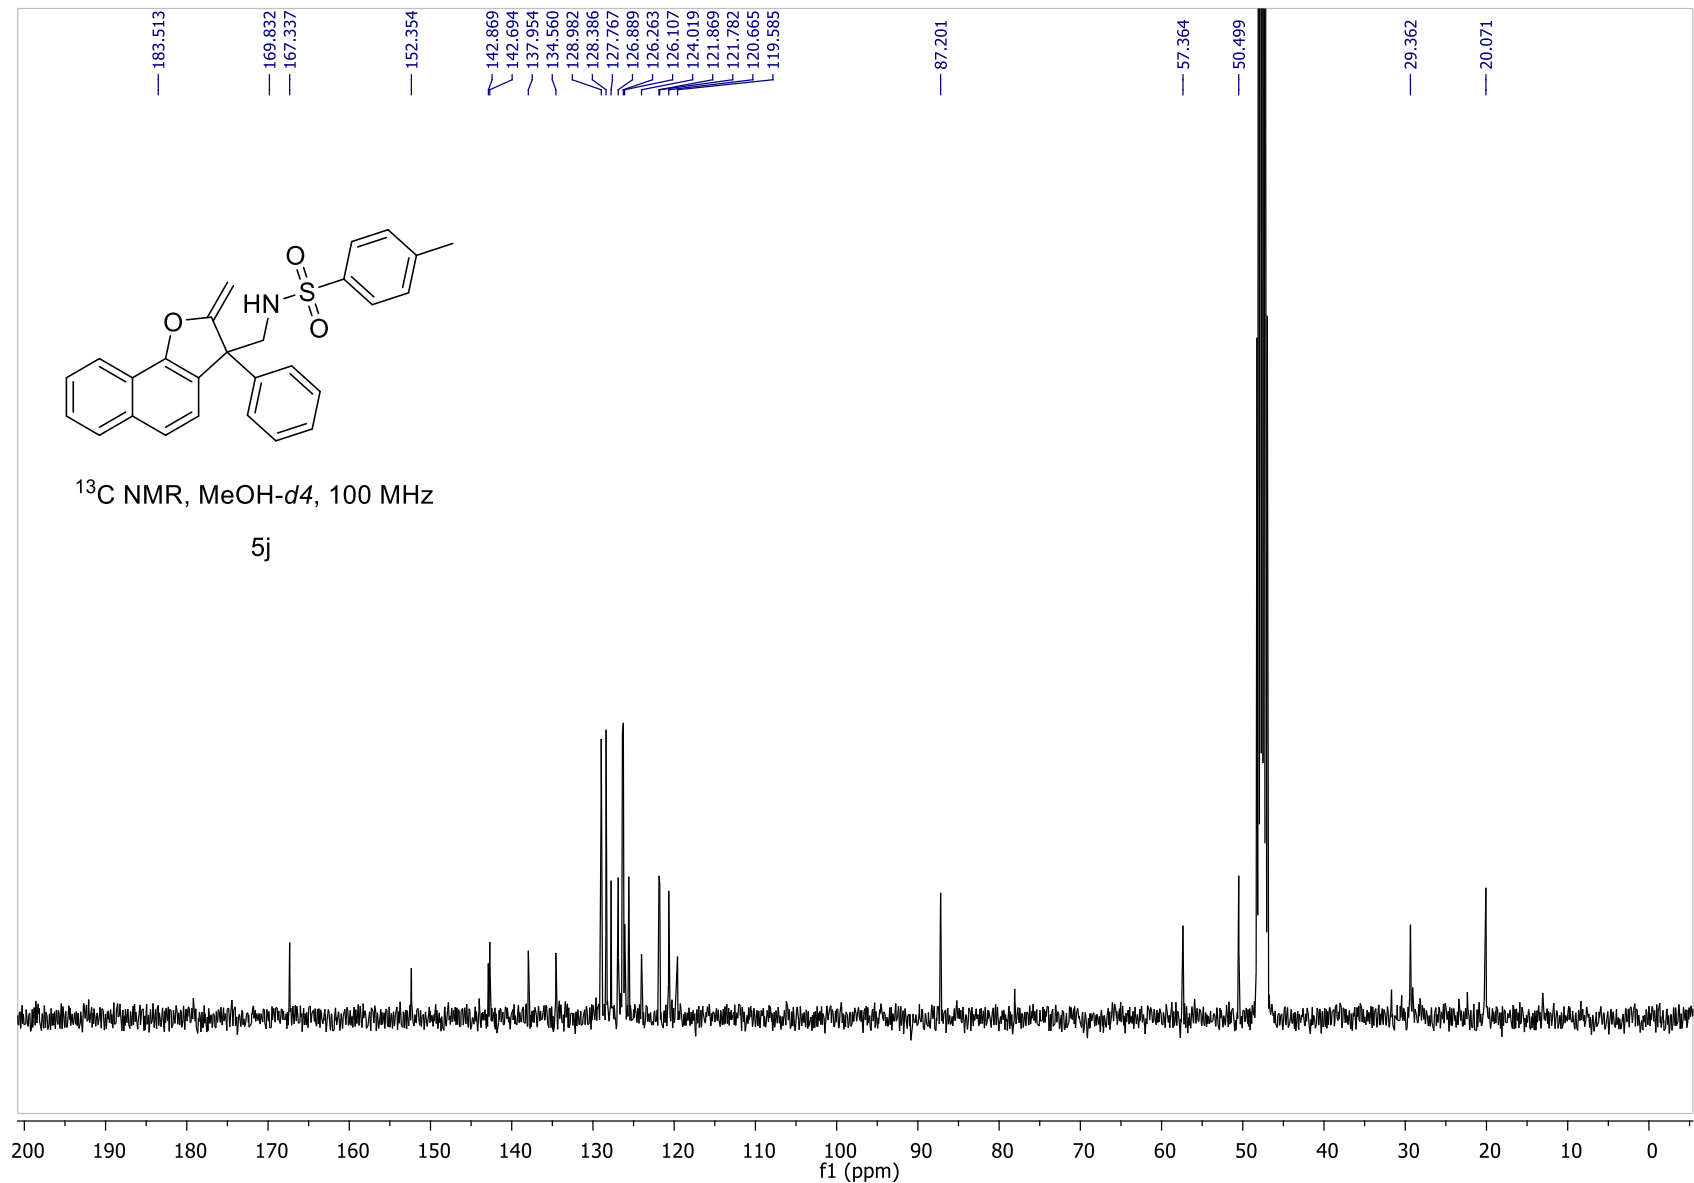

**(R)-(2-Methylene-4-oxo-3-phenyl-2,3-dihydro-4H-furo[3,2-c]chromen-3-yl)methyl acetate 6**

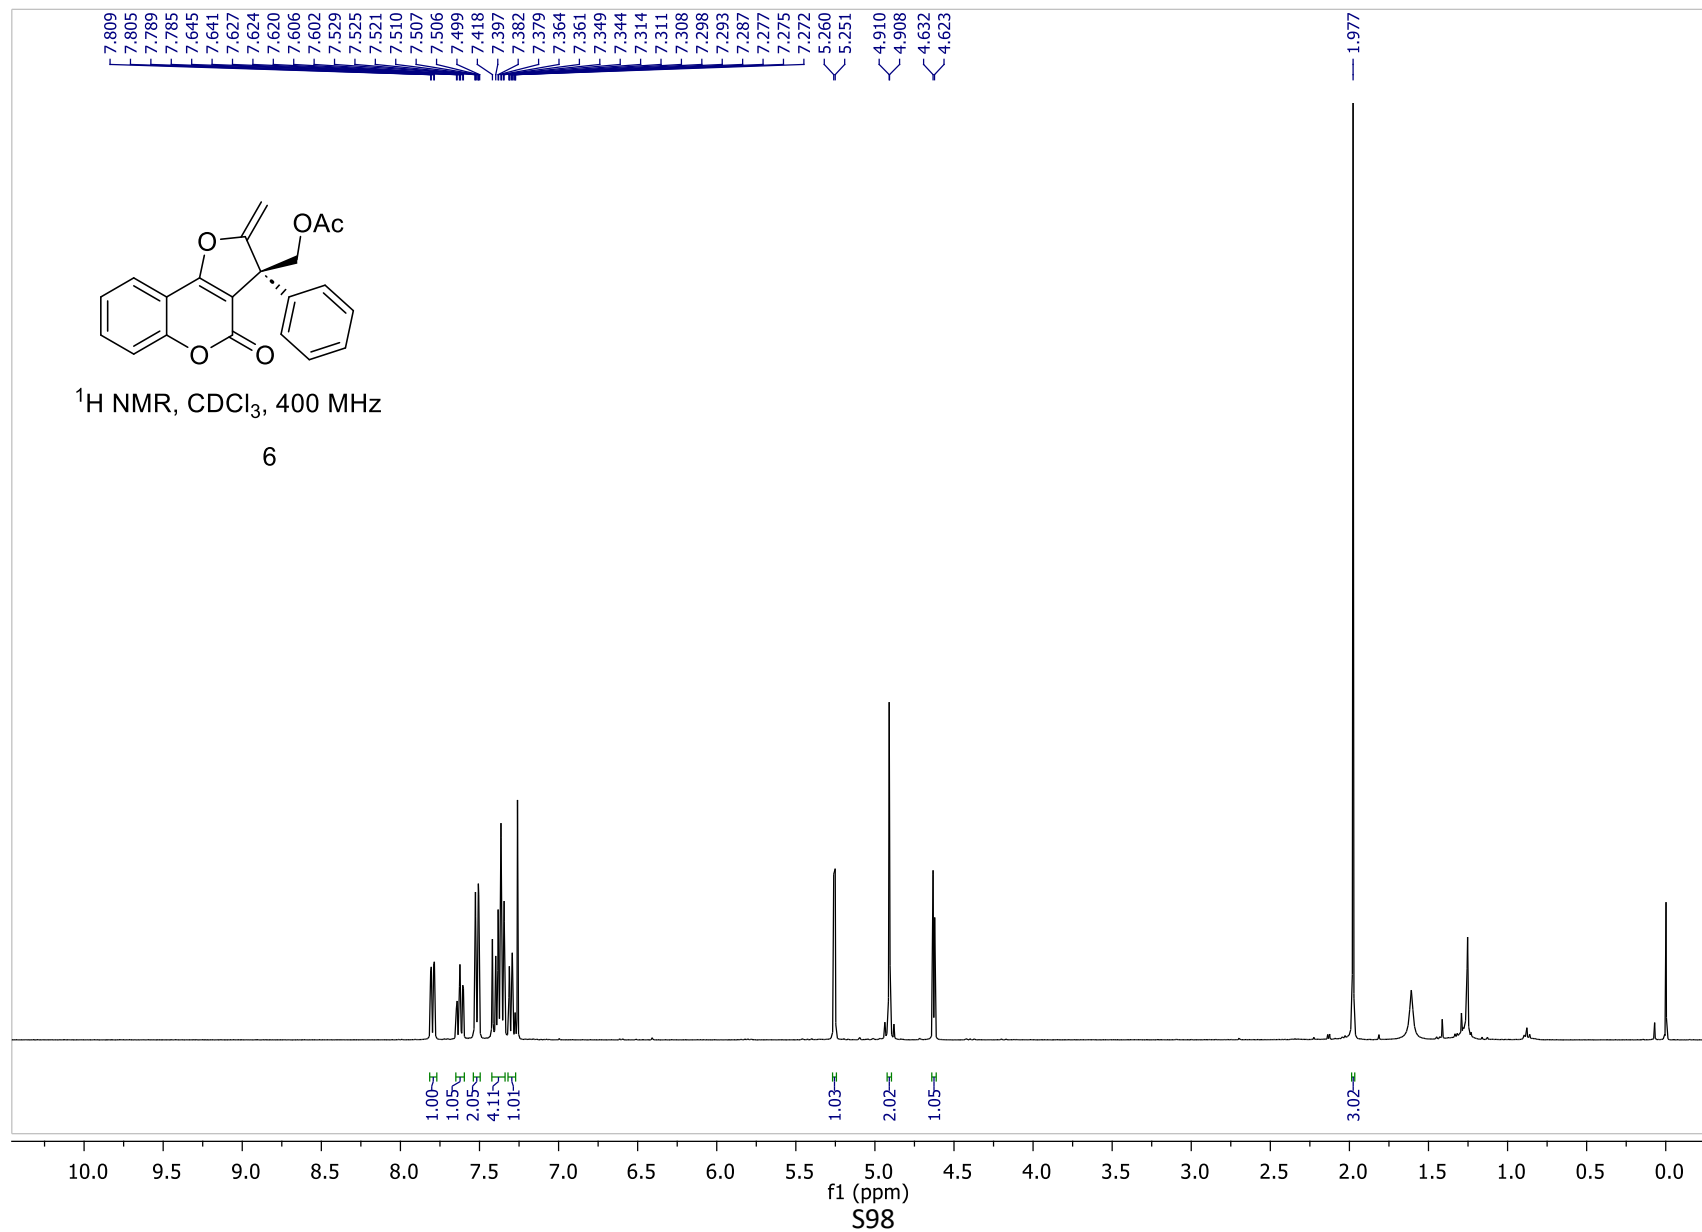

**(R)-(2-Methylene-4-oxo-3-phenyl-2,3-dihydro-4H-furo[3,2-c]chromen-3-yl)methyl acetate 6**

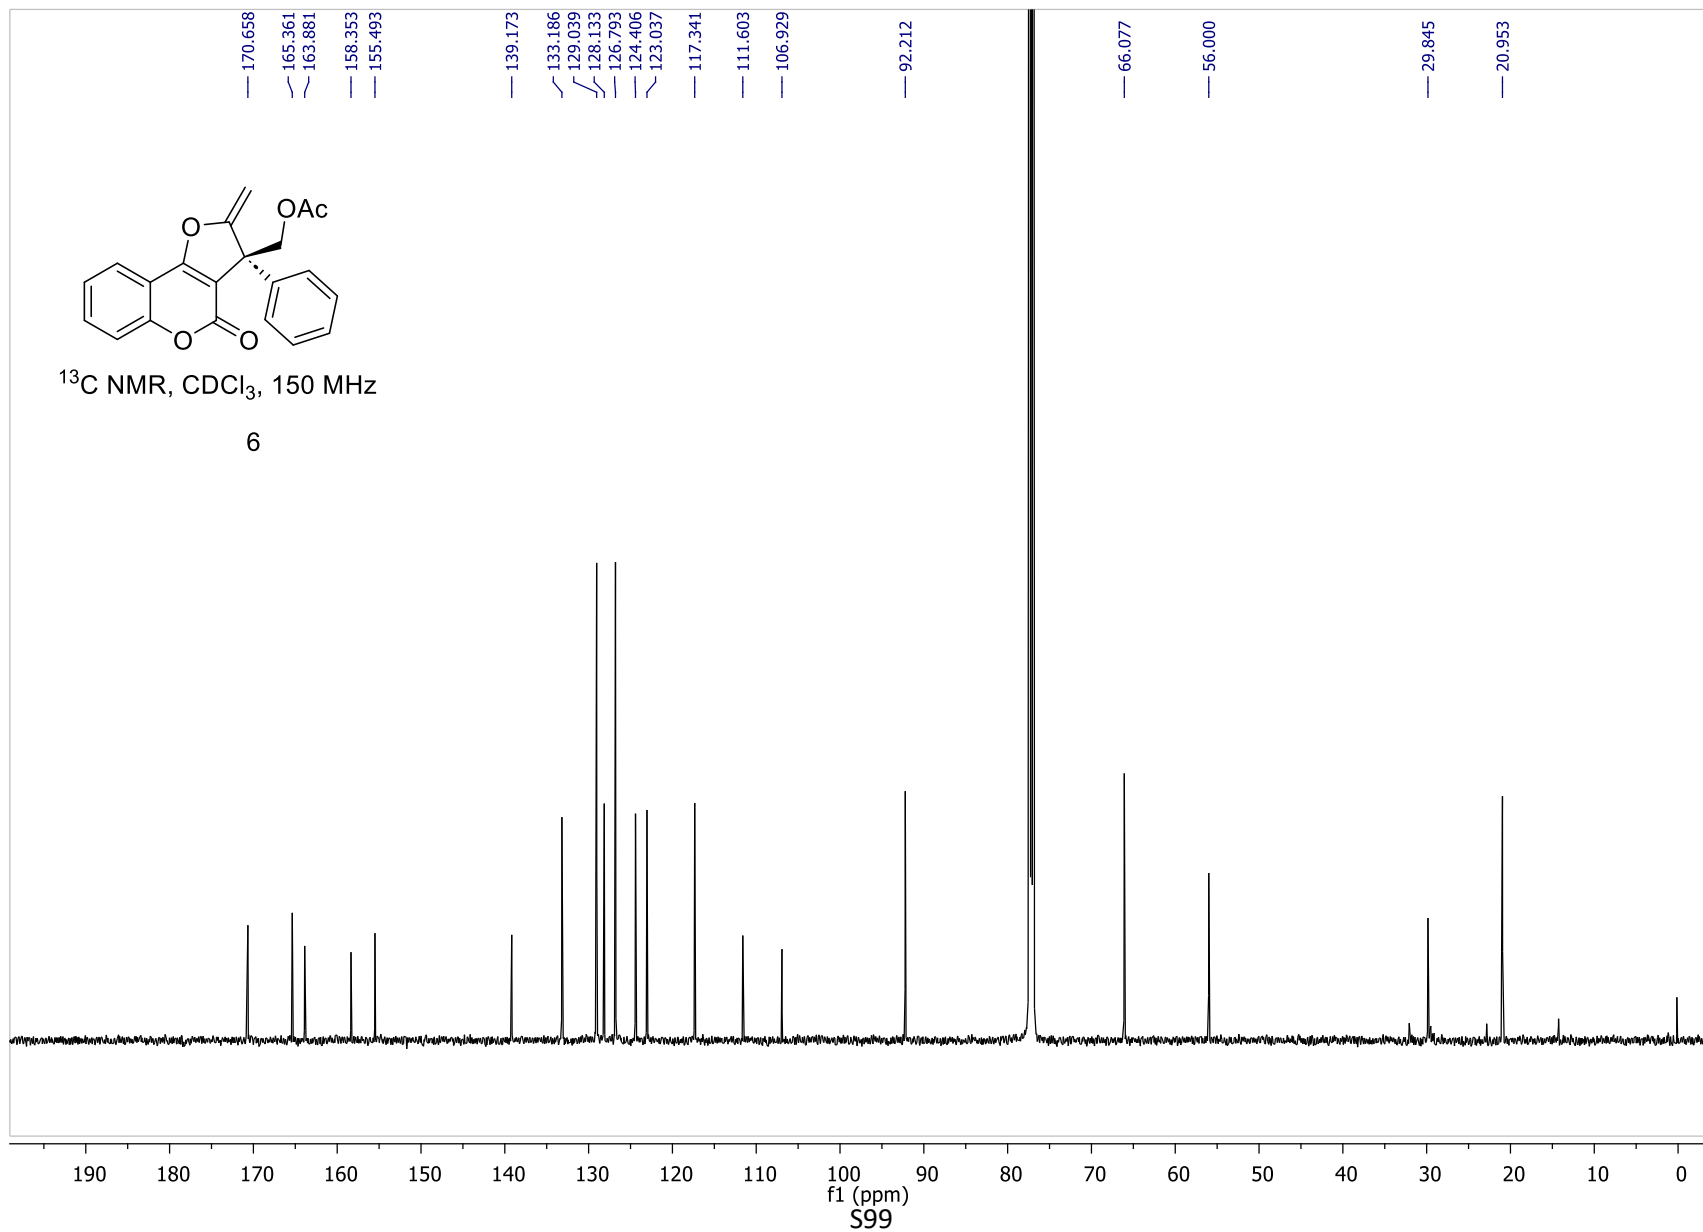

**(R)-3-(Hydroxymethyl)-2-methylene-3-(naphthalen-2-yl)-8-(phenylethynyl)-2,3-dihydro-4H-furo[3,2-c]chromen-4-one 7**

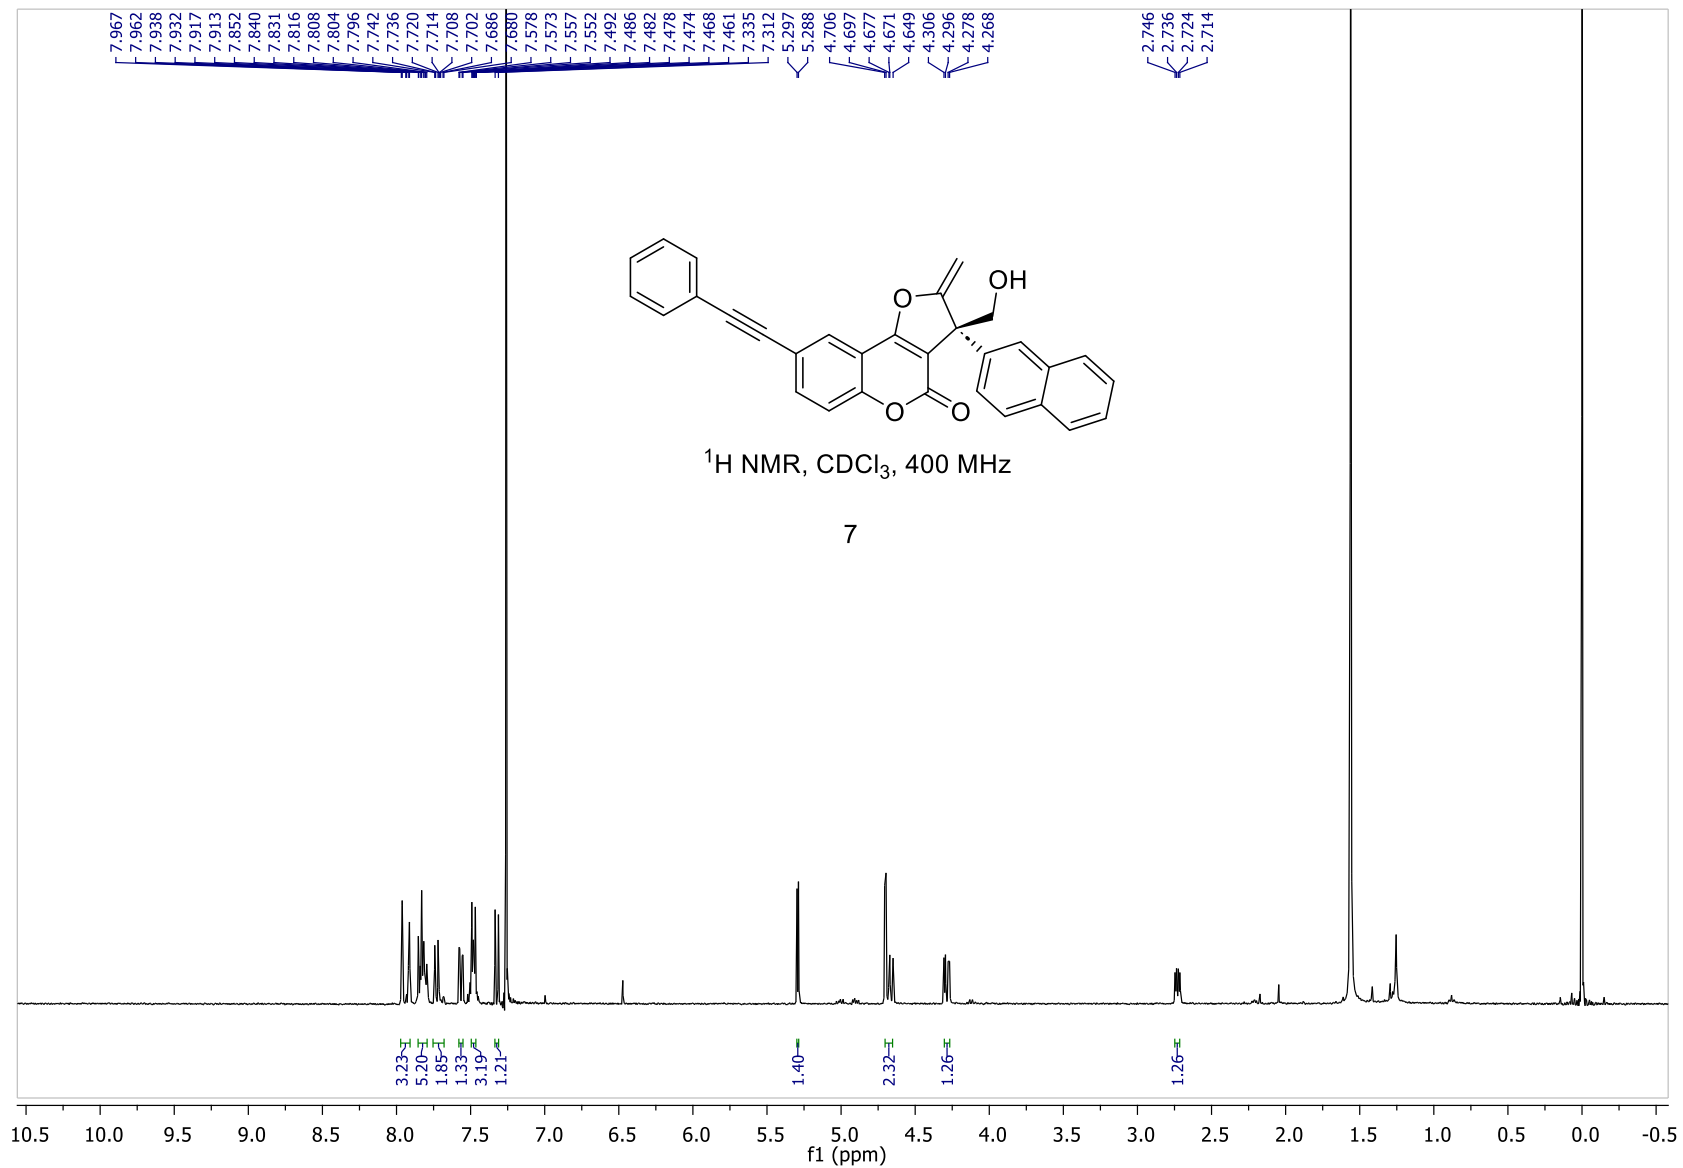



**(R)-3-(Hydroxymethyl)-2-methylene-3-(naphthalen-2-yl)-8-(phenylethynyl)-2,3-dihydro-4H-furo[3,2-c]chromen-4-one 7**

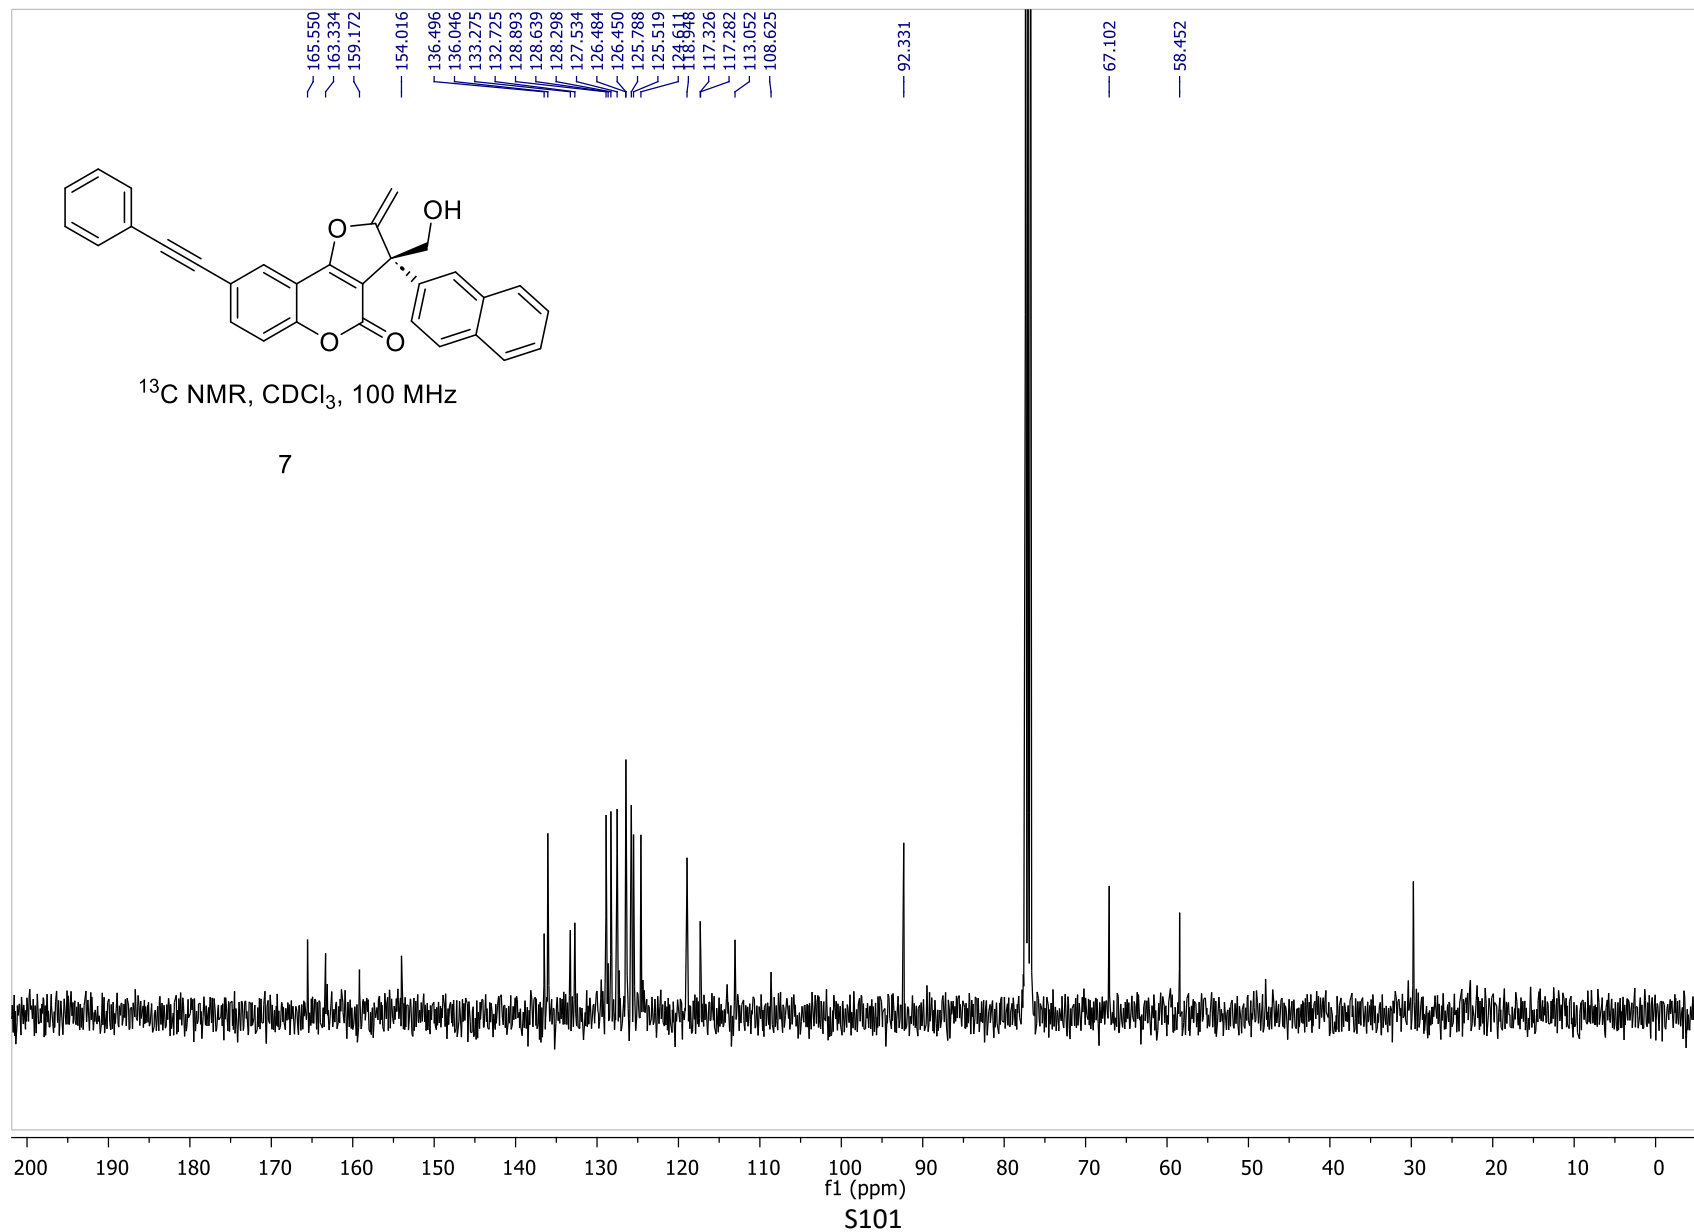

## 5. HPLC Chromatograms of Compounds

### 5.1. HPLC Chromatograms of Compounds 3a-w

HPLC analysis conditions: CHIRALPAK IA-3 column, 50% *i*PrOH in hexanes, flow rate 1.0 mL/min,  $\lambda = 225$  nm.

#### HPLC Chromatogram of Compound 3a (racemic)

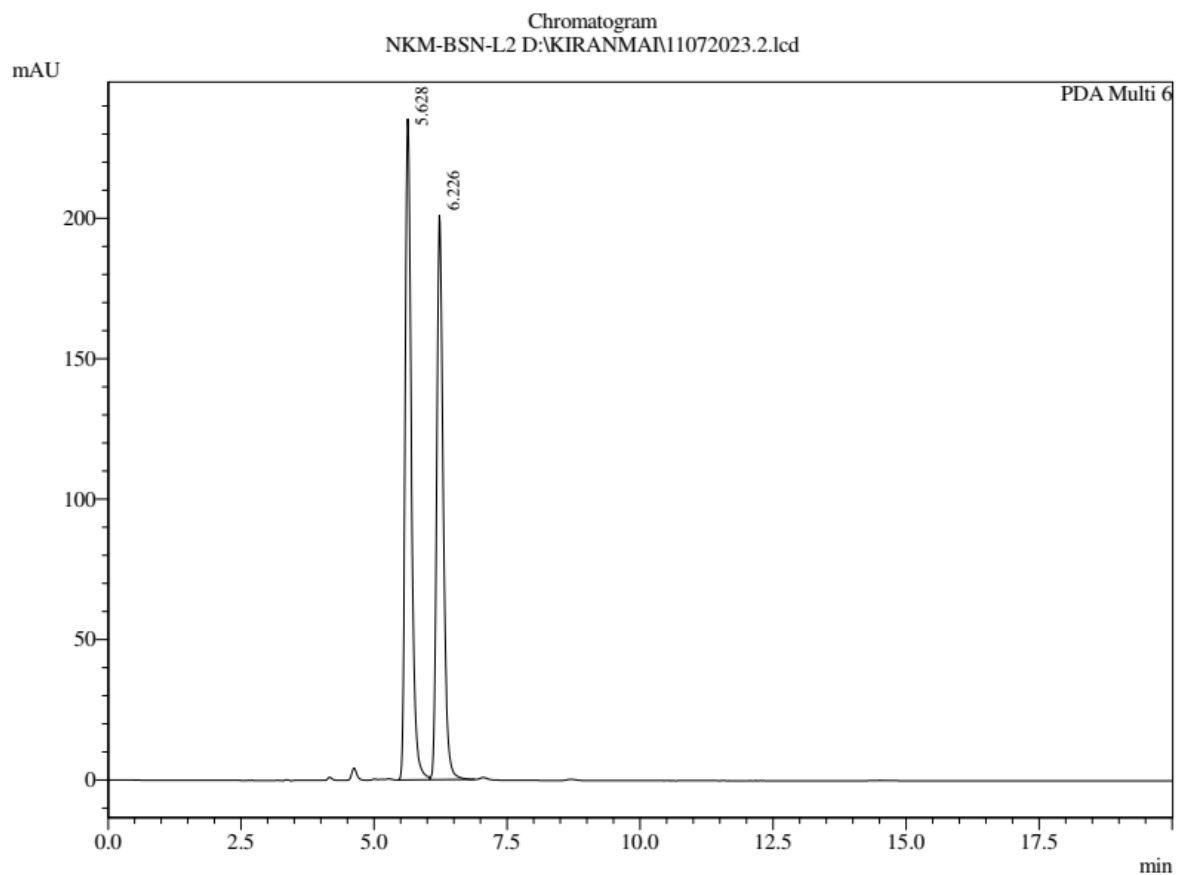

PeakTable

PDA Ch6 320nm 4nm

| Peak# | Ret. Time | Area    | Height | Area %  | Height % |
|-------|-----------|---------|--------|---------|----------|
| 1     | 5.628     | 1914842 | 235397 | 52.687  | 53.947   |
| 2     | 6.226     | 1719527 | 200954 | 47.313  | 46.053   |
| Total |           | 3634369 | 436351 | 100.000 | 100.000  |

## HPLC Chromatogram of Compound 3a obtained from L2

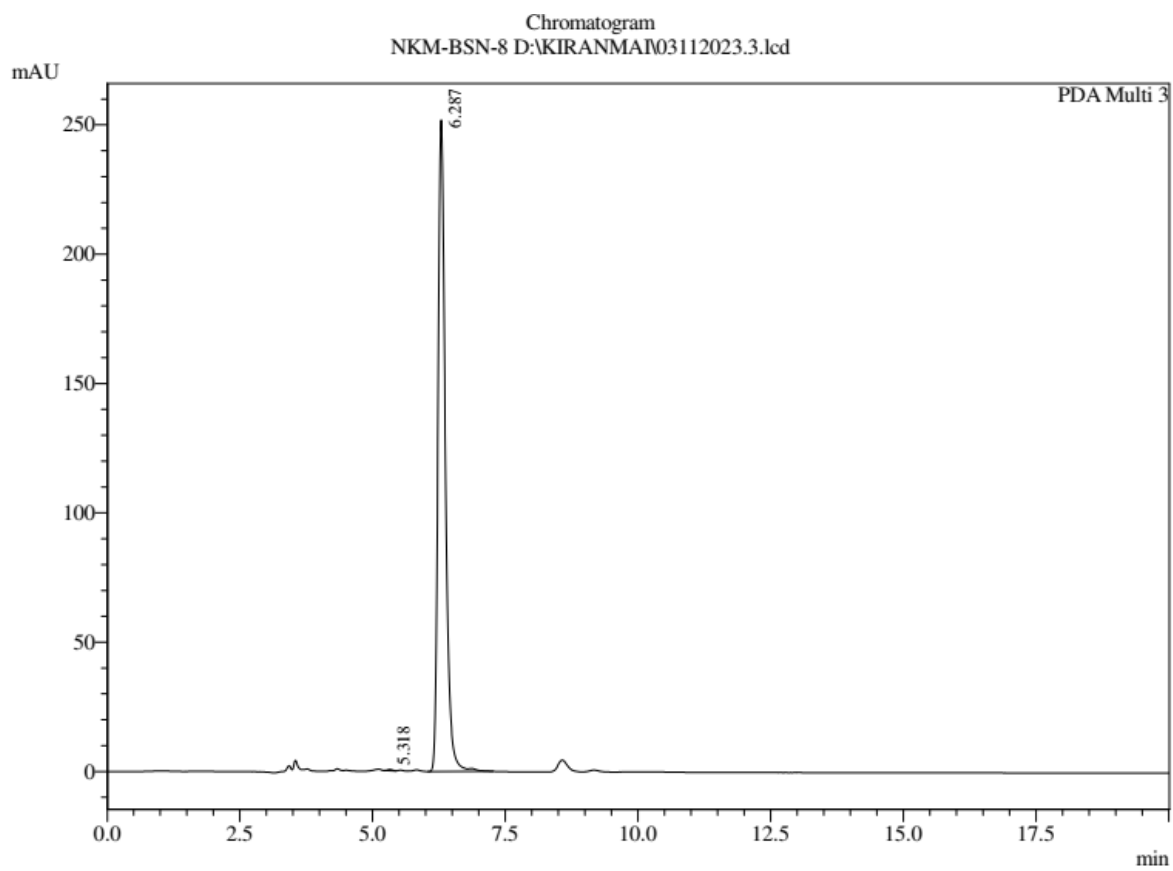

1 PDA Multi 3 / 254nm 4nm

PeakTable

PDA Ch3 254nm 4nm

| Peak# | Ret. Time | Area    | Height | Area %  | Height % |
|-------|-----------|---------|--------|---------|----------|
| 1     | 5.318     | 2908    | 485    | 0.120   | 0.192    |
| 2     | 6.287     | 2421033 | 251902 | 99.880  | 99.808   |
| Total |           | 2423941 | 252387 | 100.000 | 100.000  |

# HPLC Chromatogram of Compound 3b (racemic)

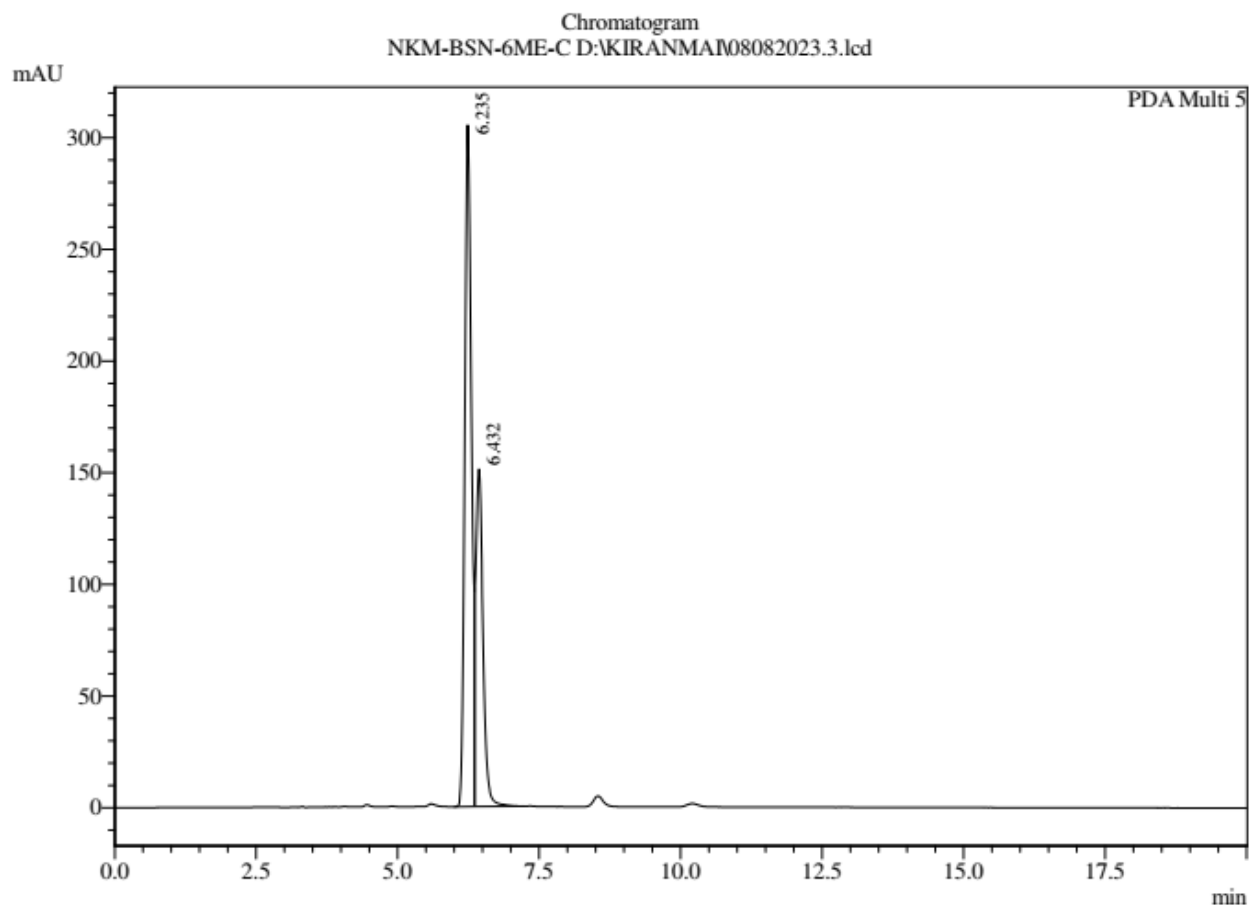

1 PDA Multi 5 / 320nm 4nm

PeakTable

PDA Ch5 320nm 4nm

| Peak# | Ret. Time | Area    | Height | Area %  | Height % |
|-------|-----------|---------|--------|---------|----------|
| 1     | 6.235     | 2532417 | 305080 | 65.456  | 66.886   |
| 2     | 6.432     | 1336481 | 151040 | 34.544  | 33.114   |
| Total |           | 3868898 | 456120 | 100.000 | 100.000  |

## HPLC Chromatogram of Compound 3b obtained from L2

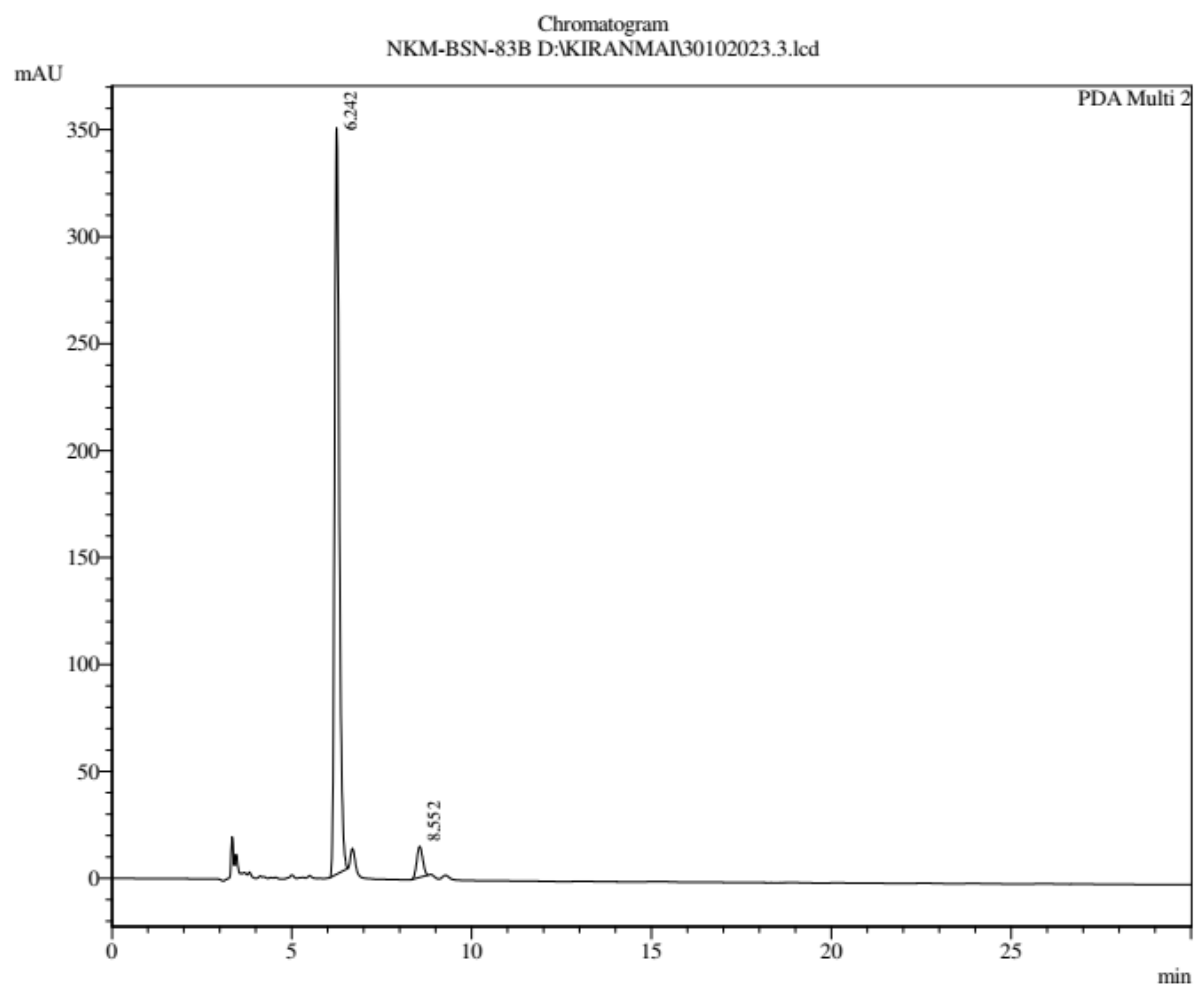

PeakTable

PDA Ch2 225nm 4nm

| Peak# | Ret. Time | Area    | Height | Area %  | Height % |
|-------|-----------|---------|--------|---------|----------|
| 1     | 6.242     | 3138245 | 348860 | 94.963  | 96.018   |
| 2     | 8.552     | 166456  | 14468  | 5.037   | 3.982    |
| Total |           | 3304701 | 363327 | 100.000 | 100.000  |

# HPLC Chromatogram of Compound 3c (racemic)

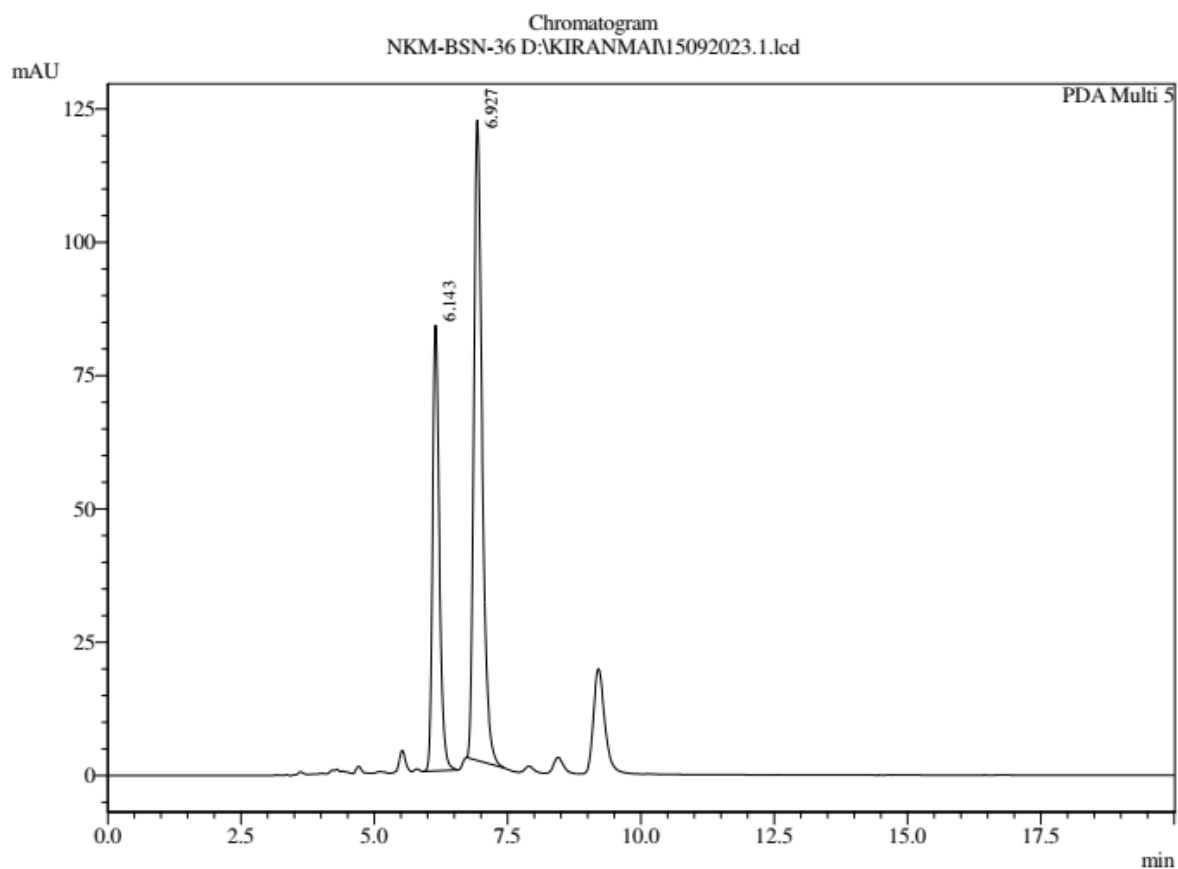

1 PDA Multi 5 / 320nm 4nm

PeakTable

PDA Ch5 320nm 4nm

| Peak# | Ret. Time | Area    | Height | Area %  | Height % |
|-------|-----------|---------|--------|---------|----------|
| 1     | 6.143     | 740061  | 83560  | 36.130  | 41.049   |
| 2     | 6.927     | 1308244 | 120000 | 63.870  | 58.951   |
| Total |           | 2048305 | 203560 | 100.000 | 100.000  |

## HPLC Chromatogram of Compound 3c obtained from L2

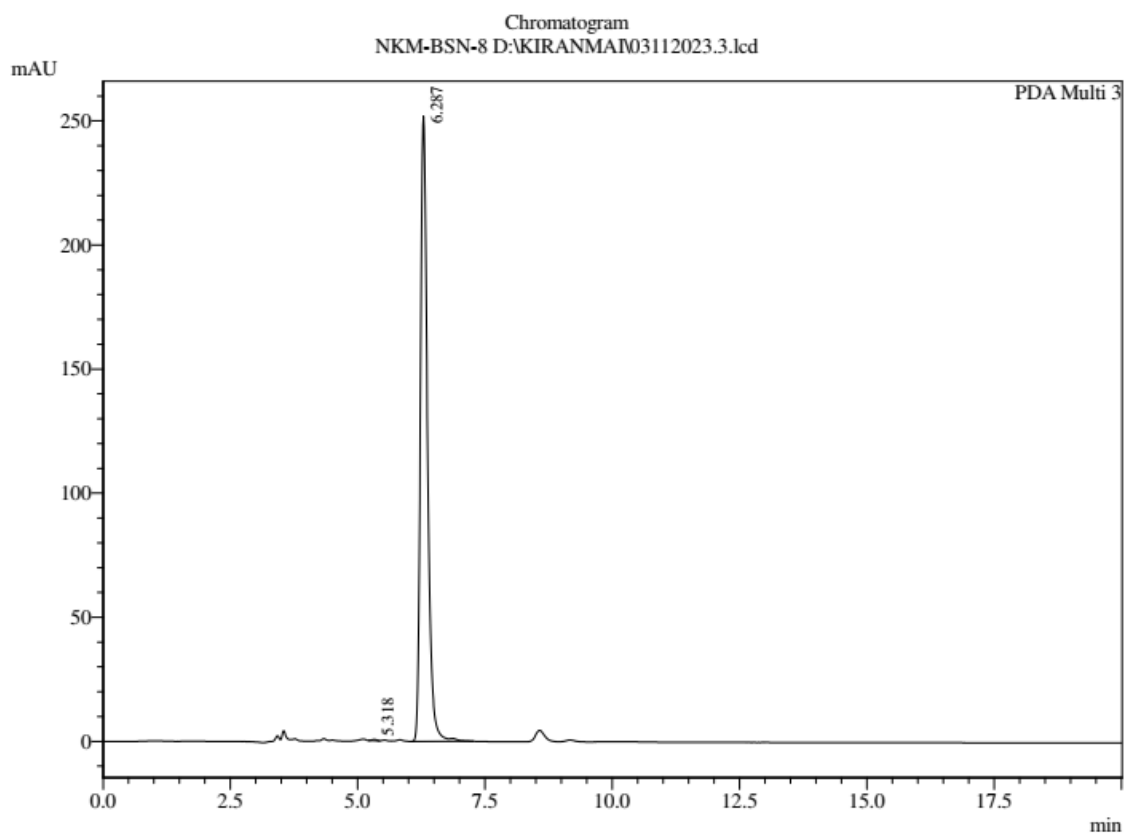

1 PDA Multi 3 / 254nm 4nm

PeakTable

PDA Ch3 254nm 4nm

| Peak# | Ret. Time | Area    | Height | Area %  | Height % |
|-------|-----------|---------|--------|---------|----------|
| 1     | 5.318     | 2908    | 485    | 0.120   | 0.192    |
| 2     | 6.287     | 2421033 | 251902 | 99.880  | 99.808   |
| Total |           | 2423941 | 252387 | 100.000 | 100.000  |

### HPLC Chromatogram of Compound 3d (racemic)

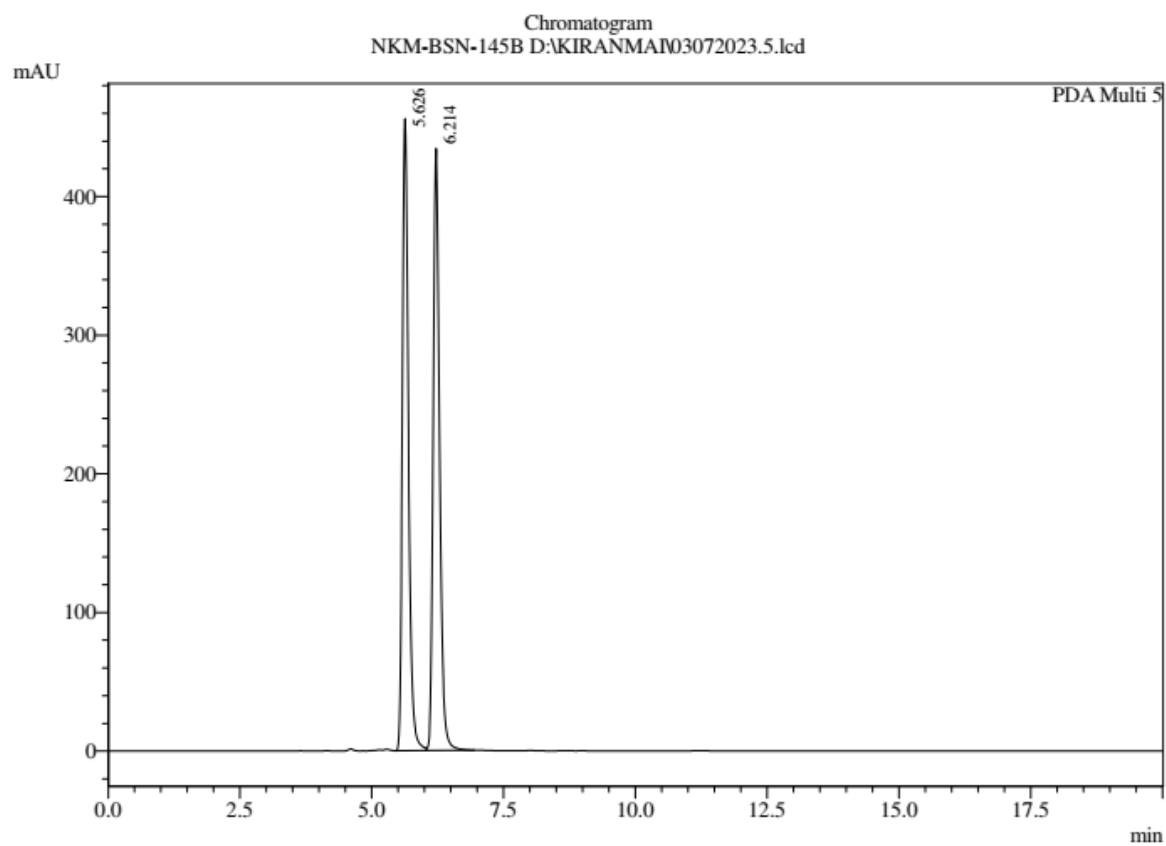

1 PDA Multi 5 / 320nm 4nm

PeakTable

PDA Ch5 320nm 4nm

| Peak# | Ret. Time | Area    | Height | Area %  | Height % |
|-------|-----------|---------|--------|---------|----------|
| 1     | 5.626     | 3642337 | 455739 | 49.824  | 51.215   |
| 2     | 6.214     | 3668009 | 434113 | 50.176  | 48.785   |
| Total |           | 7310346 | 889852 | 100.000 | 100.000  |



## HPLC Chromatogram of Compound 3d obtained from L2

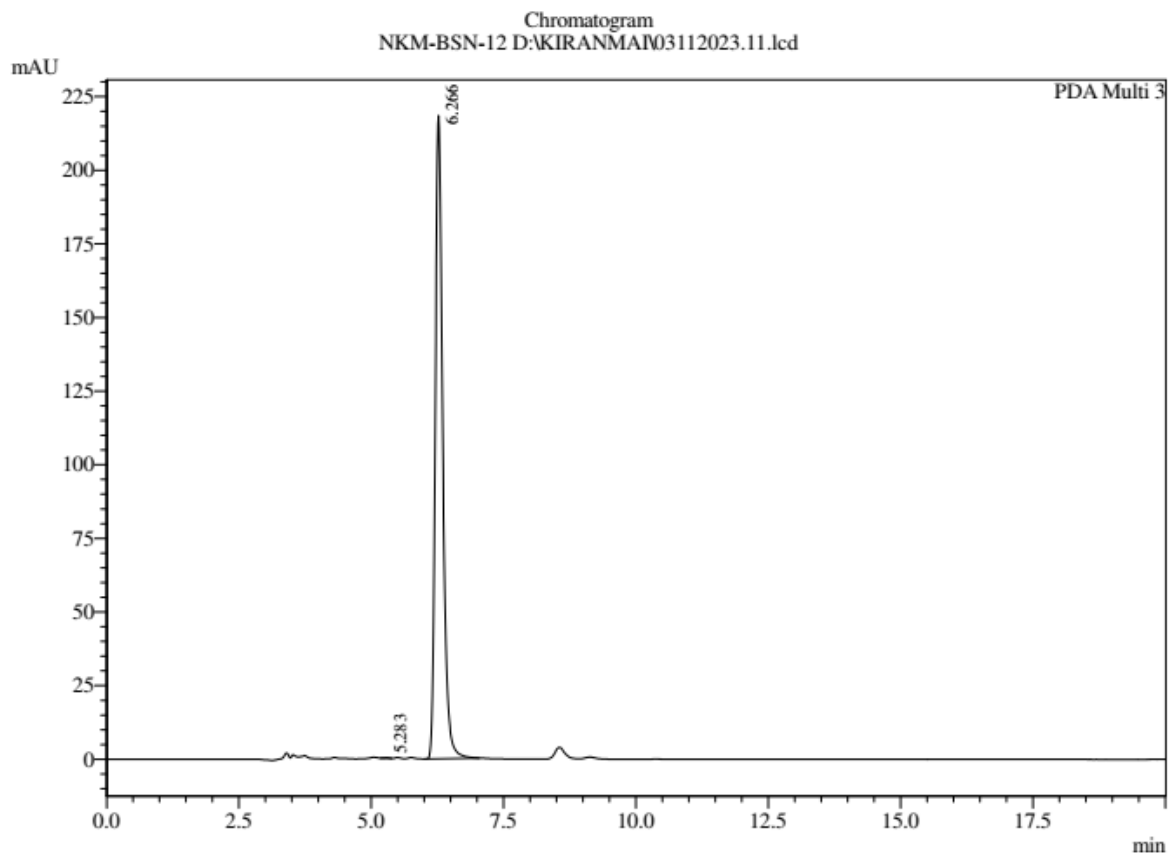

PeakTable

PDA Ch3 254nm 4nm

| Peak# | Ret. Time | Area    | Height | Area %  | Height % |
|-------|-----------|---------|--------|---------|----------|
| 1     | 5.283     | 1122    | 164    | 0.053   | 0.075    |
| 2     | 6.266     | 2131781 | 218341 | 99.947  | 99.925   |
| Total |           | 2132903 | 218505 | 100.000 | 100.000  |

# HPLC Chromatogram of Compound 3e (racemic)

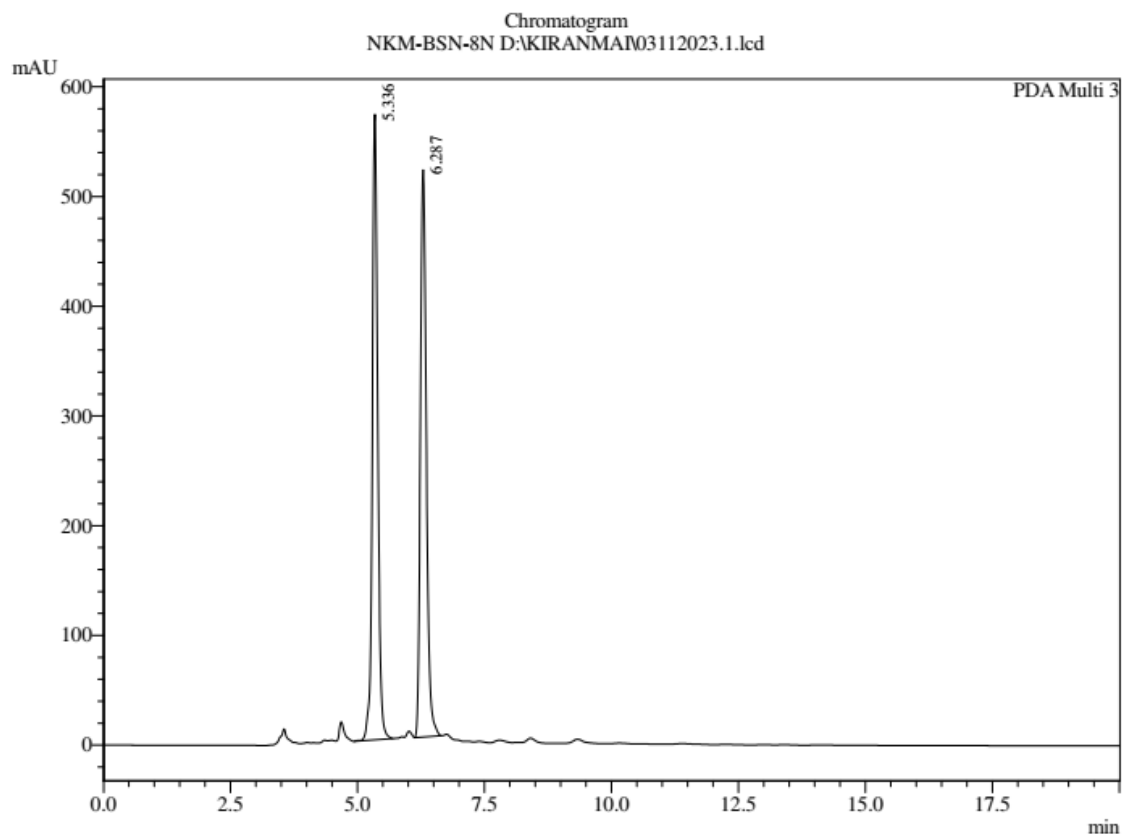

PeakTable

PDA Ch3 254nm 4nm

| Peak# | Ret. Time | Area    | Height  | Area %  | Height % |
|-------|-----------|---------|---------|---------|----------|
| 1     | 5.336     | 4219014 | 570177  | 50.030  | 52.428   |
| 2     | 6.287     | 4214030 | 517357  | 49.970  | 47.572   |
| Total |           | 8433044 | 1087534 | 100.000 | 100.000  |

## HPLC Chromatogram of Compound 3e obtained from L2

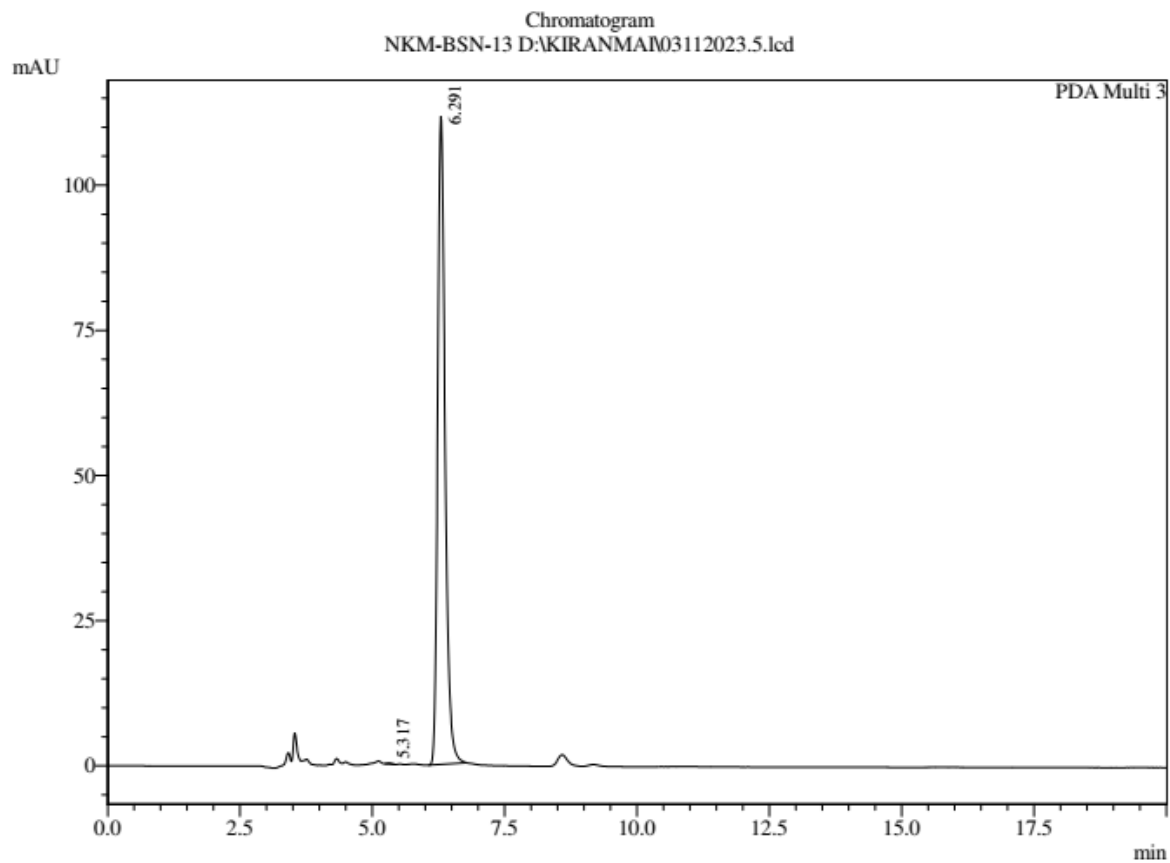

PeakTable

PDA Ch3 254nm 4nm

| Peak# | Ret. Time | Area    | Height | Area %  | Height % |
|-------|-----------|---------|--------|---------|----------|
| 1     | 5.317     | 1018    | 165    | 0.094   | 0.148    |
| 2     | 6.291     | 1086296 | 111591 | 99.906  | 99.852   |
| Total |           | 1087314 | 111756 | 100.000 | 100.000  |

# HPLC Chromatogram of Compound 3f (racemic)

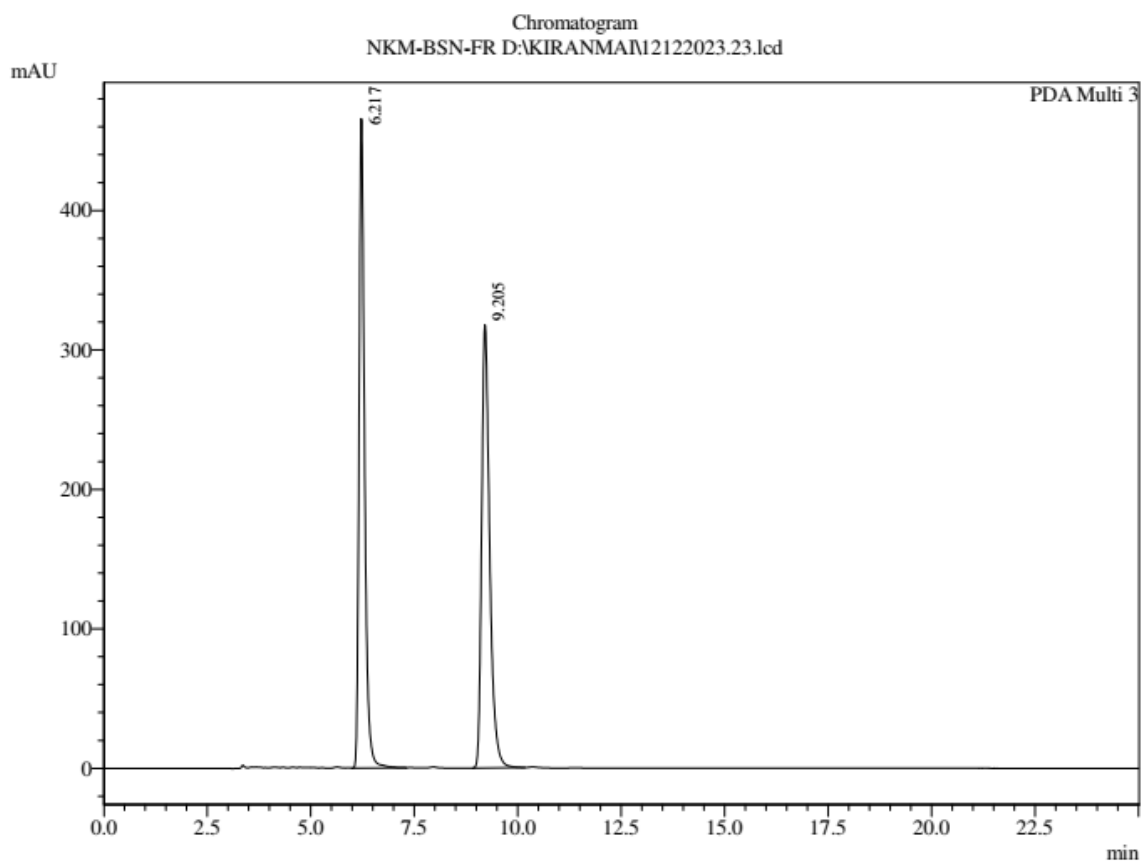

PeakTable

| Peak# | Ret. Time | Area    | Height | Area %  | Height % |
|-------|-----------|---------|--------|---------|----------|
| 1     | 6.217     | 4336684 | 465520 | 50.254  | 59.443   |
| 2     | 9.205     | 4292924 | 317614 | 49.746  | 40.557   |
| Total |           | 8629608 | 783134 | 100.000 | 100.000  |

## HPLC Chromatogram of Compound 3f obtained from L2

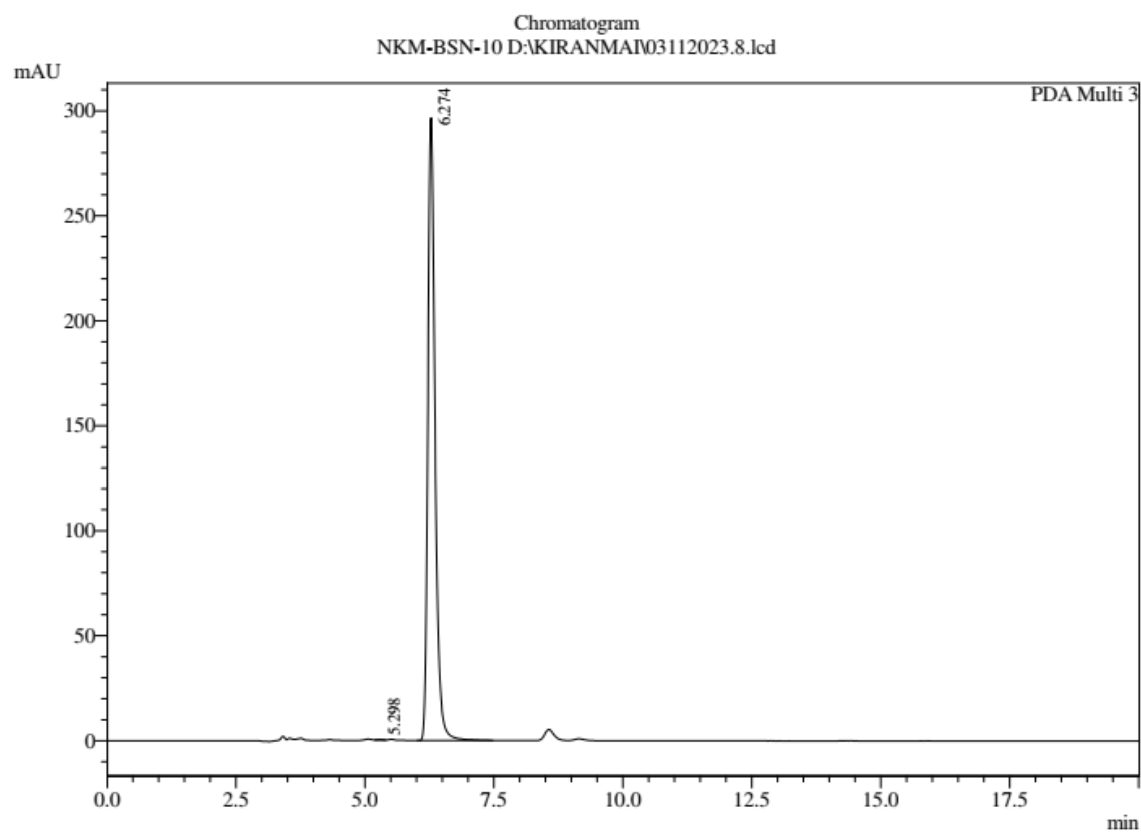

1 PDA Multi 3 / 254nm 4nm

PeakTable

PDA Ch3 254nm 4nm

| Peak# | Ret. Time | Area    | Height | Area %  | Height % |
|-------|-----------|---------|--------|---------|----------|
| 1     | 5.298     | 1399    | 202    | 0.048   | 0.068    |
| 2     | 6.274     | 2884245 | 296508 | 99.952  | 99.932   |
| Total |           | 2885645 | 296710 | 100.000 | 100.000  |

# HPLC Chromatogram of Compound 3g (racemic)

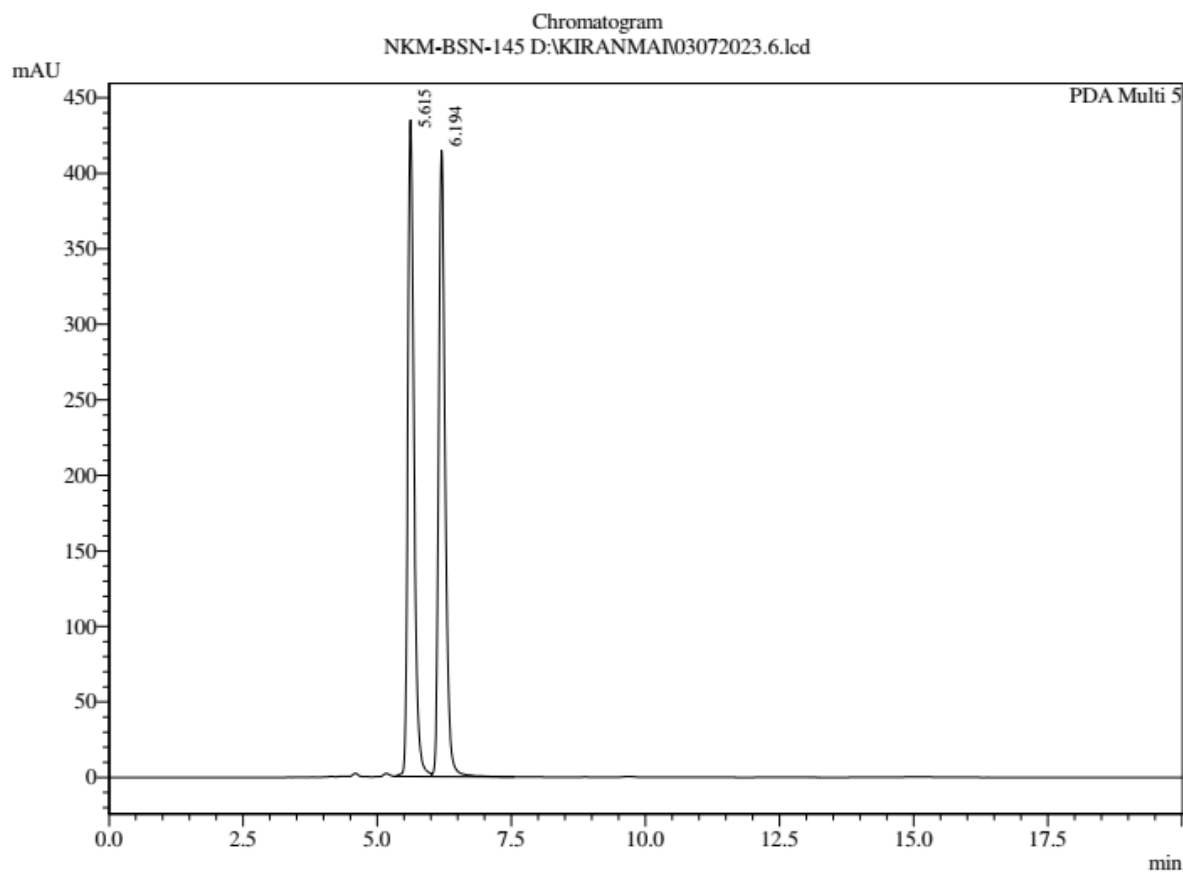

PeakTable

PDA Ch5 320nm 4nm

| Peak# | Ret. Time | Area    | Height | Area %  | Height % |
|-------|-----------|---------|--------|---------|----------|
| 1     | 5.615     | 3472909 | 434549 | 49.790  | 51.178   |
| 2     | 6.194     | 3502190 | 414552 | 50.210  | 48.822   |
| Total |           | 6975098 | 849101 | 100.000 | 100.000  |

## HPLC Chromatogram of Compound 3g obtained from L2

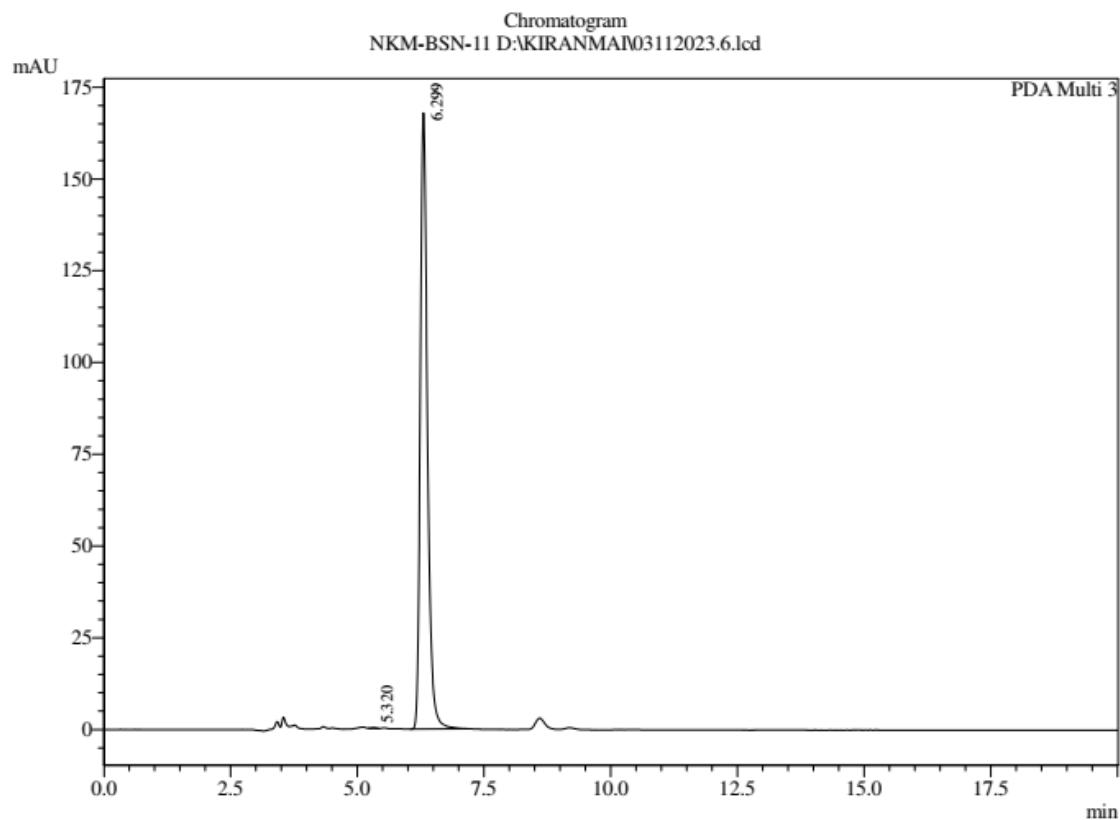

1 PDA Multi 3 / 254nm 4nm

PeakTable

PDA Ch3 254nm 4nm

| Peak# | Ret. Time | Area    | Height | Area %  | Height % |
|-------|-----------|---------|--------|---------|----------|
| 1     | 5.320     | 1134    | 181    | 0.069   | 0.108    |
| 2     | 6.299     | 1648596 | 167853 | 99.931  | 99.892   |
| Total |           | 1649731 | 168034 | 100.000 | 100.000  |

# HPLC Chromatogram of Compound 3h (racemic)

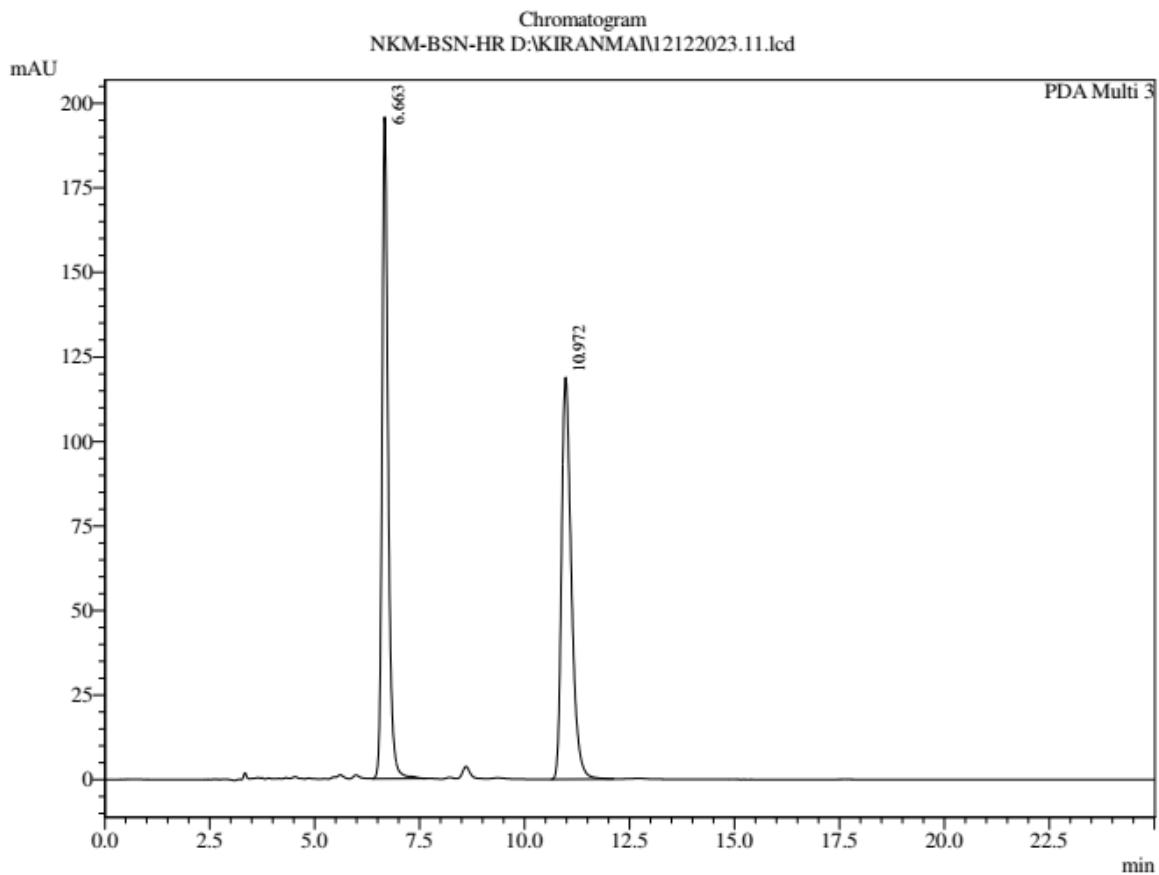

1 PDA Multi 3 / 254nm 4nm

PeakTable

PDA Ch3 254nm 4nm

| Peak# | Ret. Time | Area    | Height | Area %  | Height % |
|-------|-----------|---------|--------|---------|----------|
| 1     | 6.663     | 1979095 | 195689 | 50.575  | 62.203   |
| 2     | 10.972    | 1934068 | 118906 | 49.425  | 37.797   |
| Total |           | 3913163 | 314594 | 100.000 | 100.000  |



## HPLC Chromatogram of Compound 3h obtained from L2

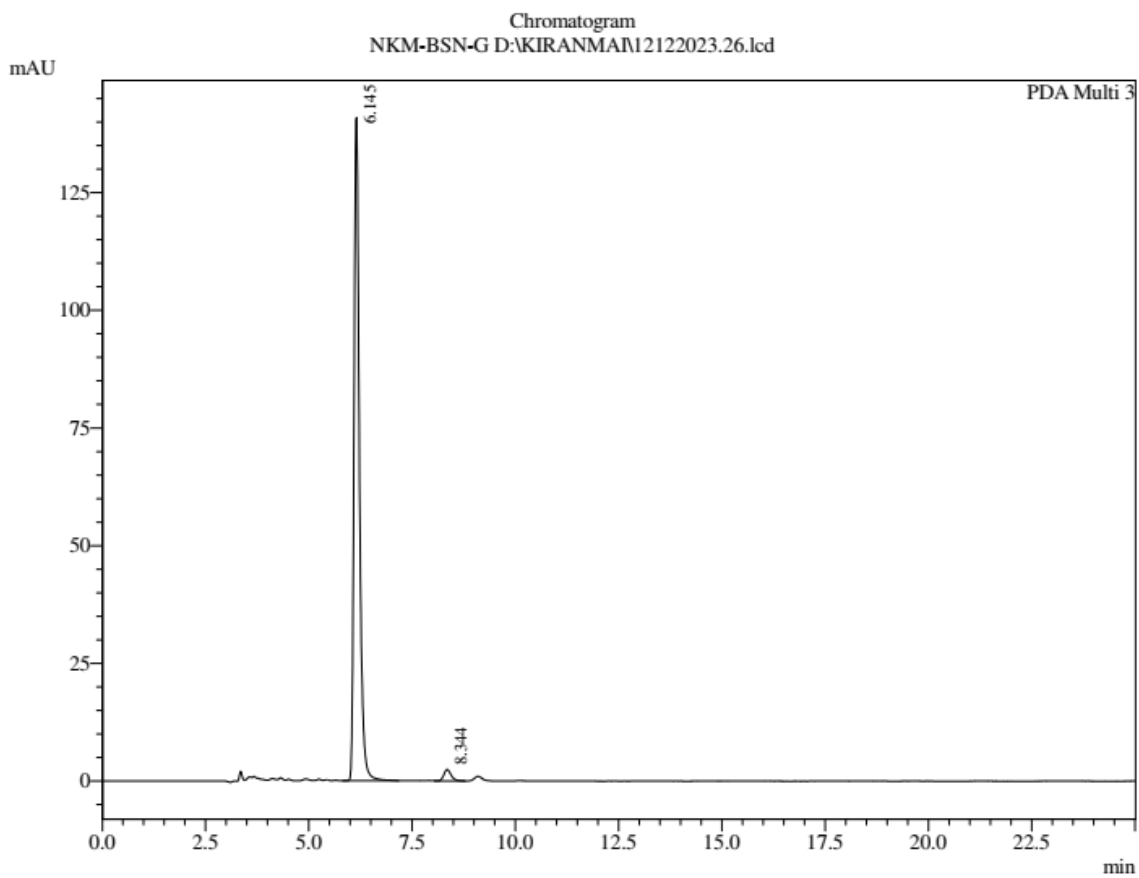

1 PDA Multi 3 / 254nm 4nm

PeakTable

PDA Ch3 254nm 4nm

| Peak# | Ret. Time | Area    | Height | Area %  | Height % |
|-------|-----------|---------|--------|---------|----------|
| 1     | 6.145     | 1265724 | 140876 | 97.711  | 98.312   |
| 2     | 8.344     | 29647   | 2418   | 2.289   | 1.688    |
| Total |           | 1295372 | 143295 | 100.000 | 100.000  |

# HPLC Chromatogram of Compound 3i (racemic)

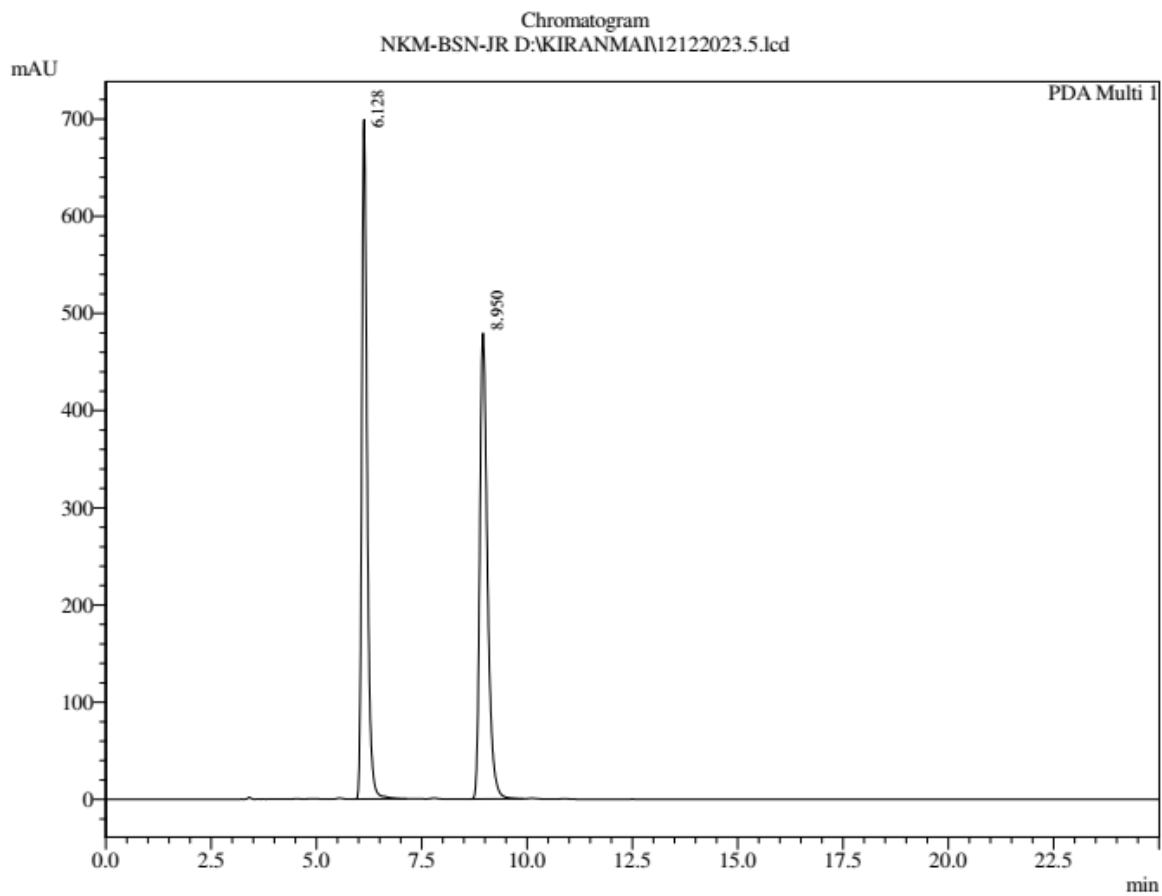

PeakTable

PDA Ch1 280nm 4nm

| Peak# | Ret. Time | Area     | Height  | Area %  | Height % |
|-------|-----------|----------|---------|---------|----------|
| 1     | 6.128     | 6168546  | 699043  | 50.298  | 59.322   |
| 2     | 8.950     | 6095394  | 479347  | 49.702  | 40.678   |
| Total |           | 12263940 | 1178390 | 100.000 | 100.000  |

## HPLC Chromatogram of Compound 3i obtained from L2

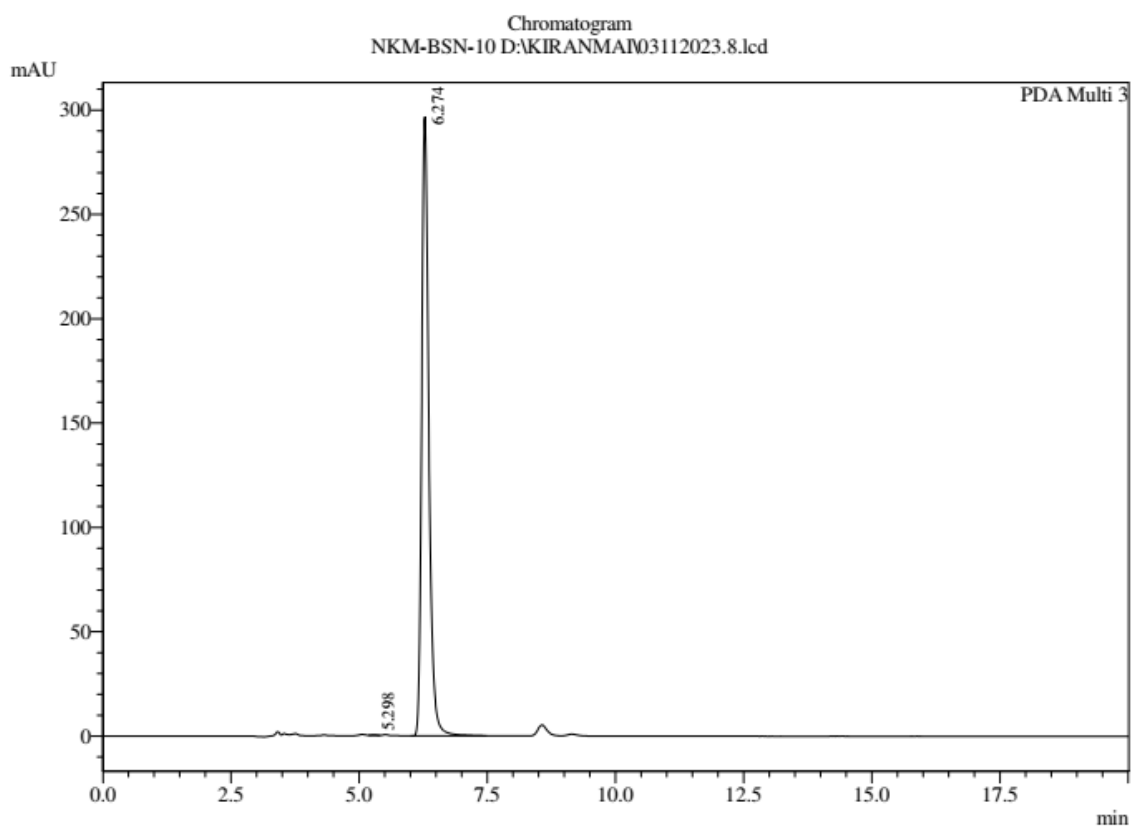

1 PDA Multi 3 / 254nm 4nm

PeakTable

PDA Ch3 254nm 4nm

| Peak# | Ret. Time | Area    | Height | Area %  | Height % |
|-------|-----------|---------|--------|---------|----------|
| 1     | 5.298     | 1399    | 202    | 0.048   | 0.068    |
| 2     | 6.274     | 2884245 | 296508 | 99.952  | 99.932   |
| Total |           | 2885645 | 296710 | 100.000 | 100.000  |

# HPLC Chromatogram of Compound 3j (racemic)

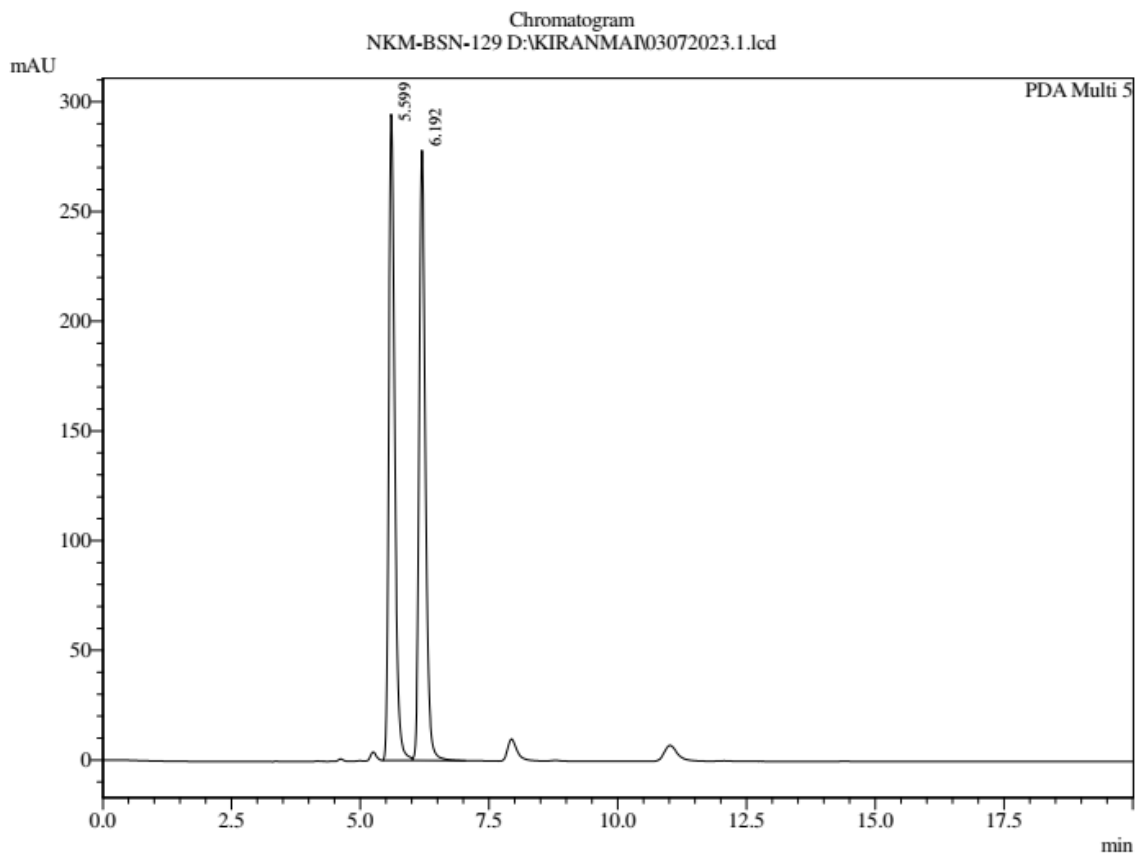

PeakTable

PDA Ch5 320nm 4nm

| Peak# | Ret. Time | Area    | Height | Area %  | Height % |
|-------|-----------|---------|--------|---------|----------|
| 1     | 5.599     | 2356483 | 294477 | 50.042  | 51.427   |
| 2     | 6.192     | 2352560 | 278132 | 49.958  | 48.573   |
| Total |           | 4709043 | 572609 | 100.000 | 100.000  |

# HPLC Chromatogram of Compound 3j obtained from L2

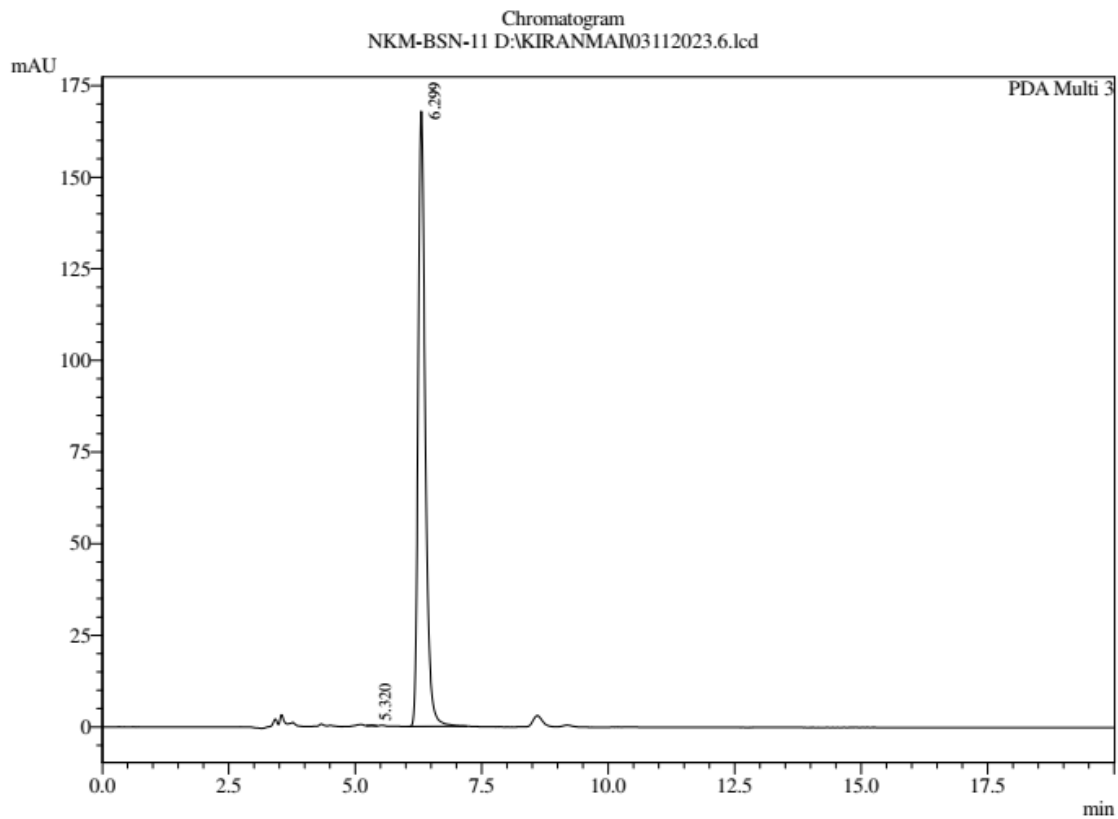

PeakTable

PDA Ch3 254nm 4nm

| Peak# | Ret. Time | Area    | Height | Area %  | Height % |
|-------|-----------|---------|--------|---------|----------|
| 1     | 5.320     | 1134    | 181    | 0.069   | 0.108    |
| 2     | 6.299     | 1648596 | 167853 | 99.931  | 99.892   |
| Total |           | 1649731 | 168034 | 100.000 | 100.000  |

# HPLC Chromatogram of Compound 3k (racemic)

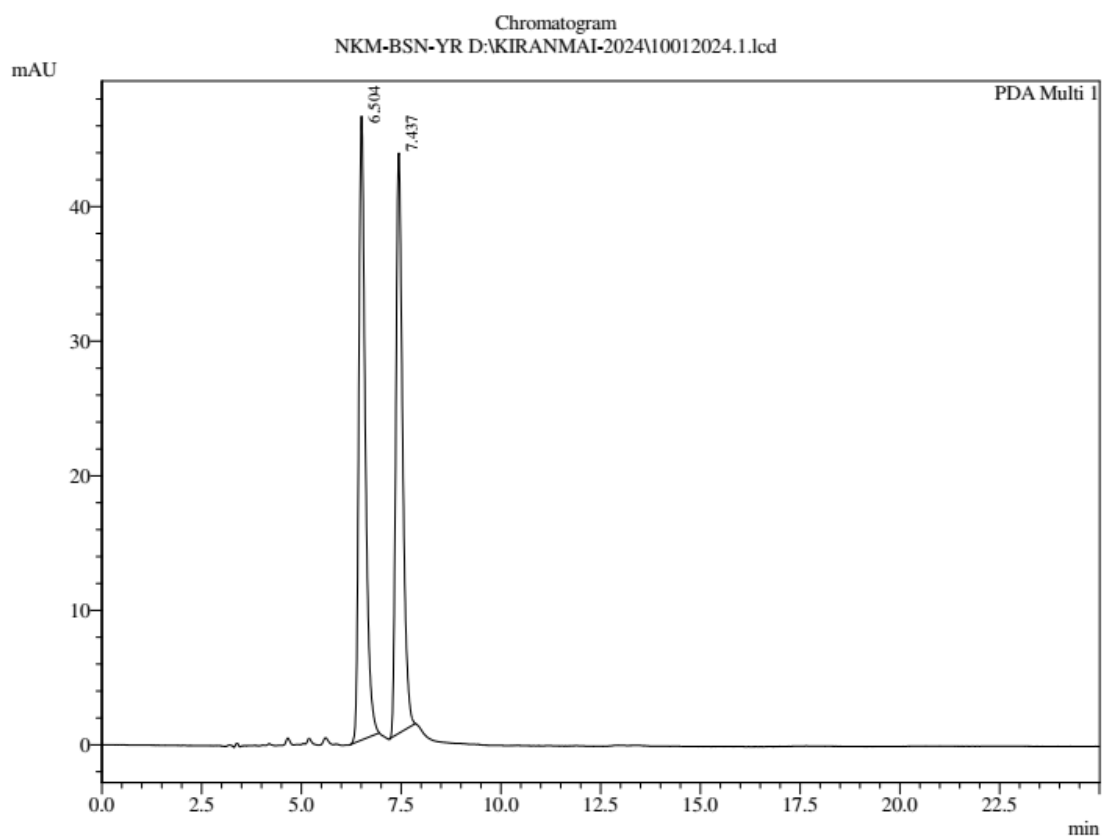

PeakTable

| Peak# | Ret. Time | Area    | Height | Area %  | Height % |
|-------|-----------|---------|--------|---------|----------|
| 1     | 6.504     | 527457  | 46363  | 50.894  | 51.798   |
| 2     | 7.437     | 508921  | 43144  | 49.106  | 48.202   |
| Total |           | 1036378 | 89507  | 100.000 | 100.000  |

## HPLC Chromatogram of Compound 3k obtained from L2

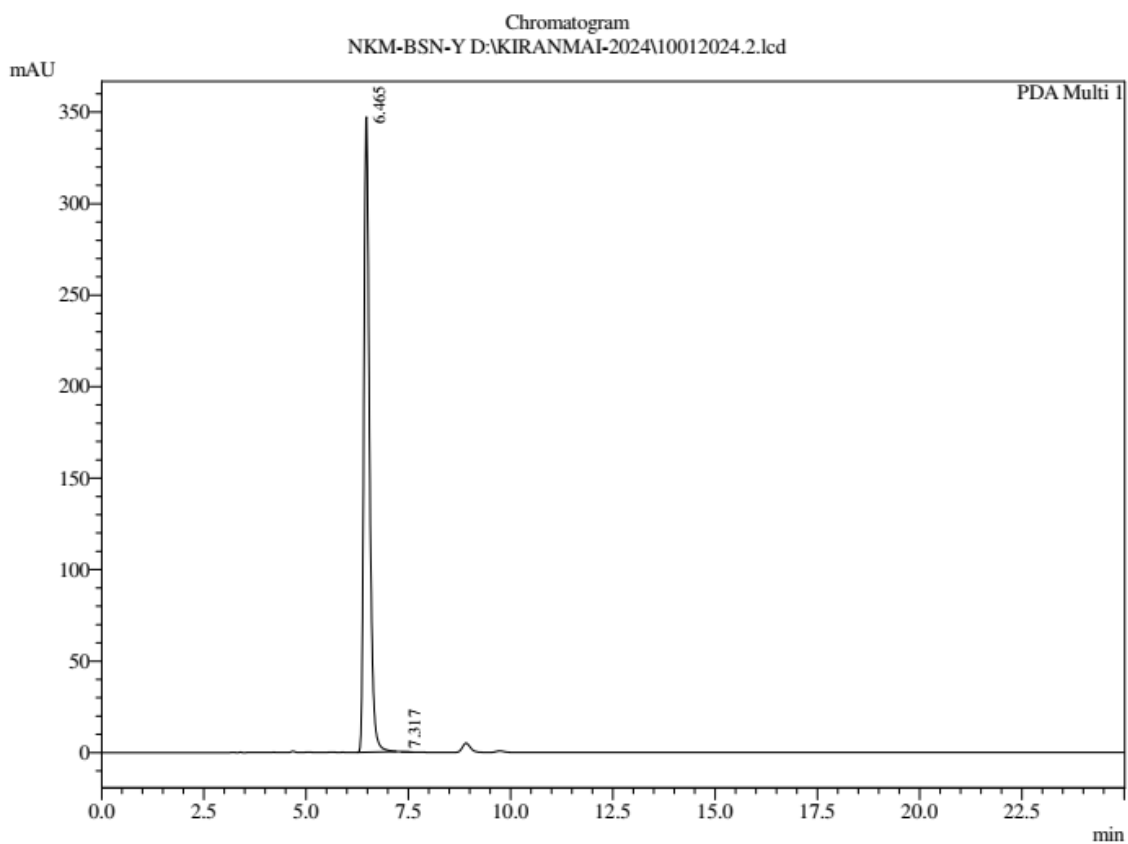

1 PDA Multi 1 / 320nm 4nm

PeakTable

PDA Ch1 320nm 4nm

| Peak# | Ret. Time | Area    | Height | Area %  | Height % |
|-------|-----------|---------|--------|---------|----------|
| 1     | 6.465     | 3339035 | 347200 | 99.998  | 100.000  |
| 2     | 7.317     | 78      | 0      | 0.002   | 0.000    |
| Total |           | 3339113 | 347200 | 100.000 | 100.000  |

# HPLC Chromatogram of Compound 3l (racemic)

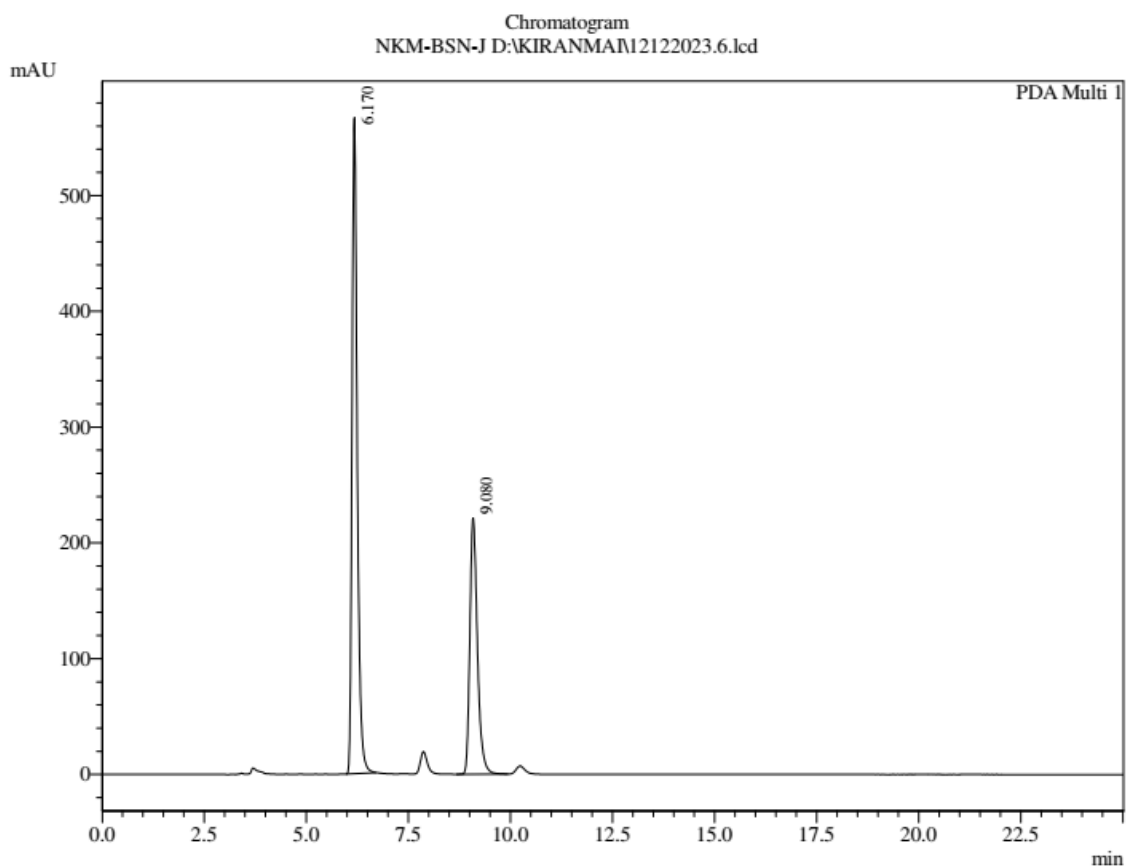

1 PDA Multi 1 / 280nm 4nm

PeakTable

PDA Ch1 280nm 4nm

| Peak# | Ret. Time | Area    | Height | Area %  | Height % |
|-------|-----------|---------|--------|---------|----------|
| 1     | 6.170     | 5013545 | 566510 | 63.830  | 71.922   |
| 2     | 9.080     | 2841006 | 221165 | 36.170  | 28.078   |
| Total |           | 7854551 | 787675 | 100.000 | 100.000  |



# HPLC Chromatogram of Compound 3l obtained from L2

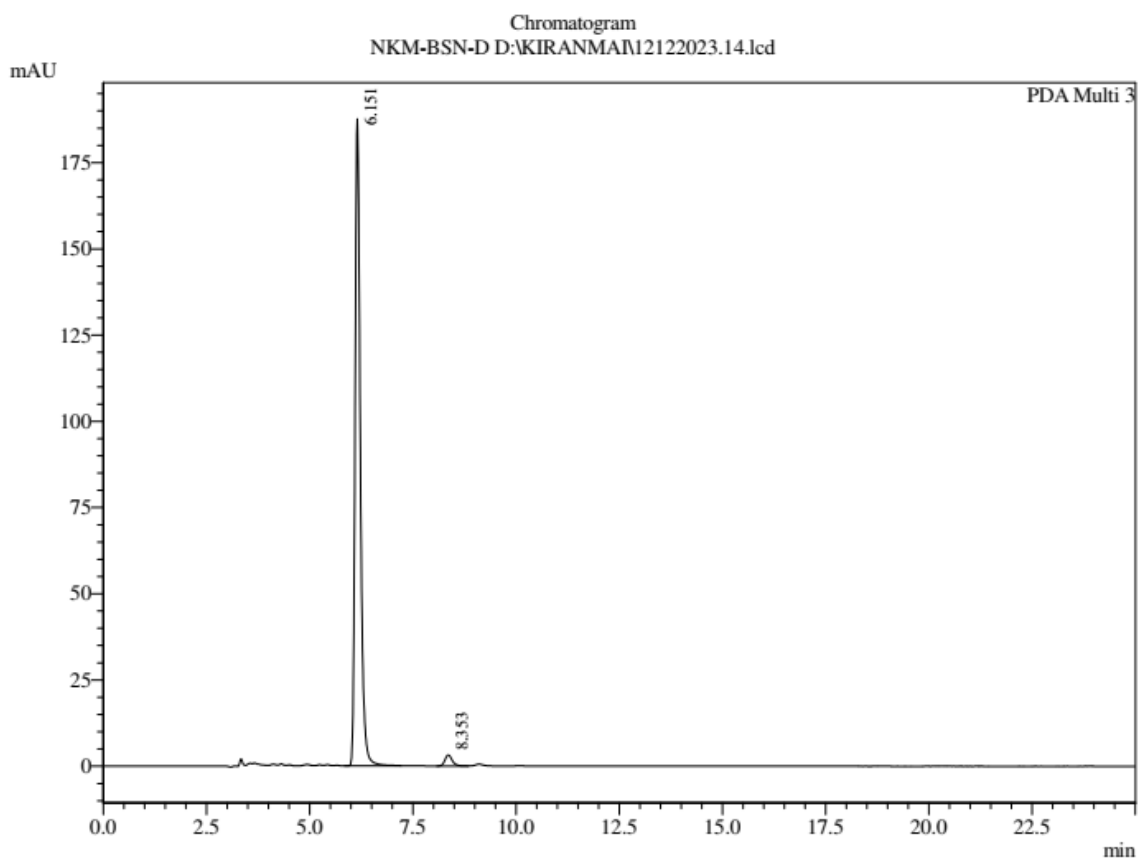

PeakTable

PDA Ch3 254nm 4nm

| Peak# | Ret. Time | Area    | Height | Area %  | Height % |
|-------|-----------|---------|--------|---------|----------|
| 1     | 6.151     | 1663360 | 187581 | 97.702  | 98.325   |
| 2     | 8.353     | 39125   | 3196   | 2.298   | 1.675    |
| Total |           | 1702486 | 190777 | 100.000 | 100.000  |

# HPLC Chromatogram of Compound 3m (racemic)

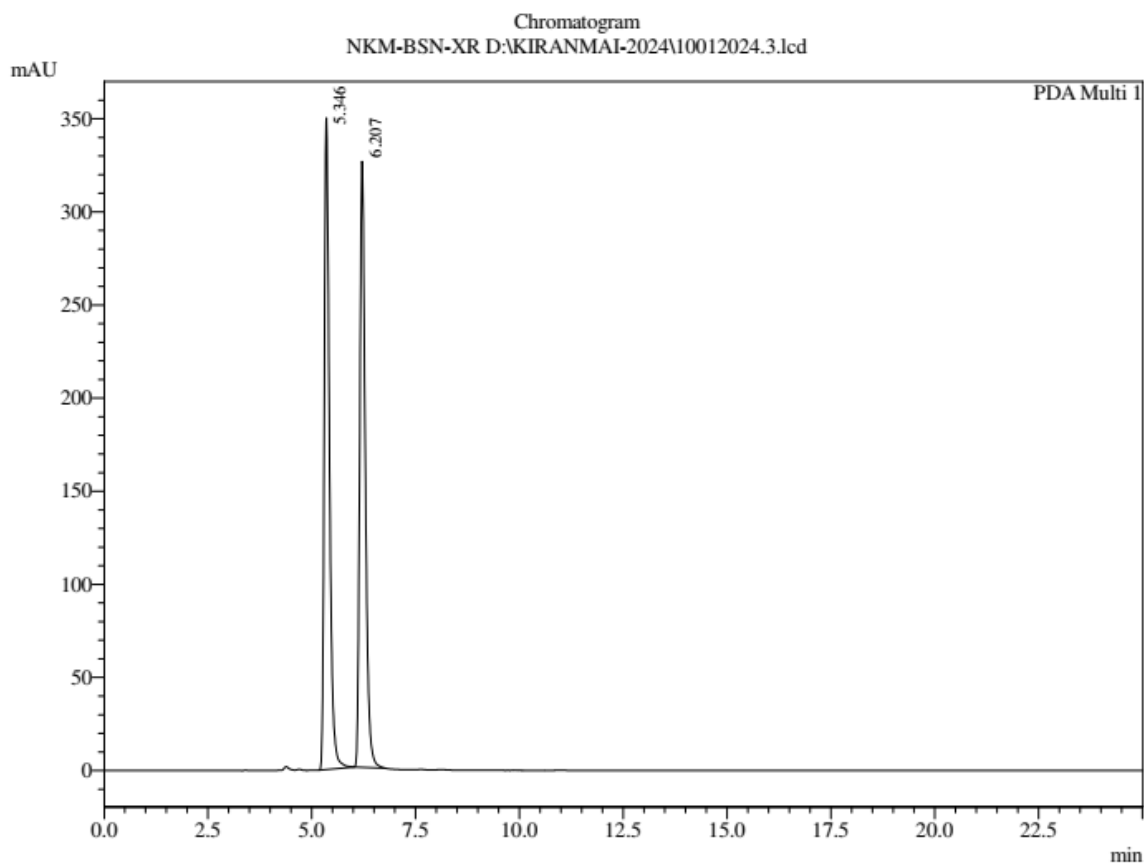

PeakTable

PDA Ch1 320nm 4nm

| Peak# | Ret. Time | Area    | Height | Area %  | Height % |
|-------|-----------|---------|--------|---------|----------|
| 1     | 5.346     | 3045691 | 349892 | 50.108  | 51.807   |
| 2     | 6.207     | 3032582 | 325488 | 49.892  | 48.193   |
| Total |           | 6078272 | 675380 | 100.000 | 100.000  |

## HPLC Chromatogram of Compound 3m obtained from L2

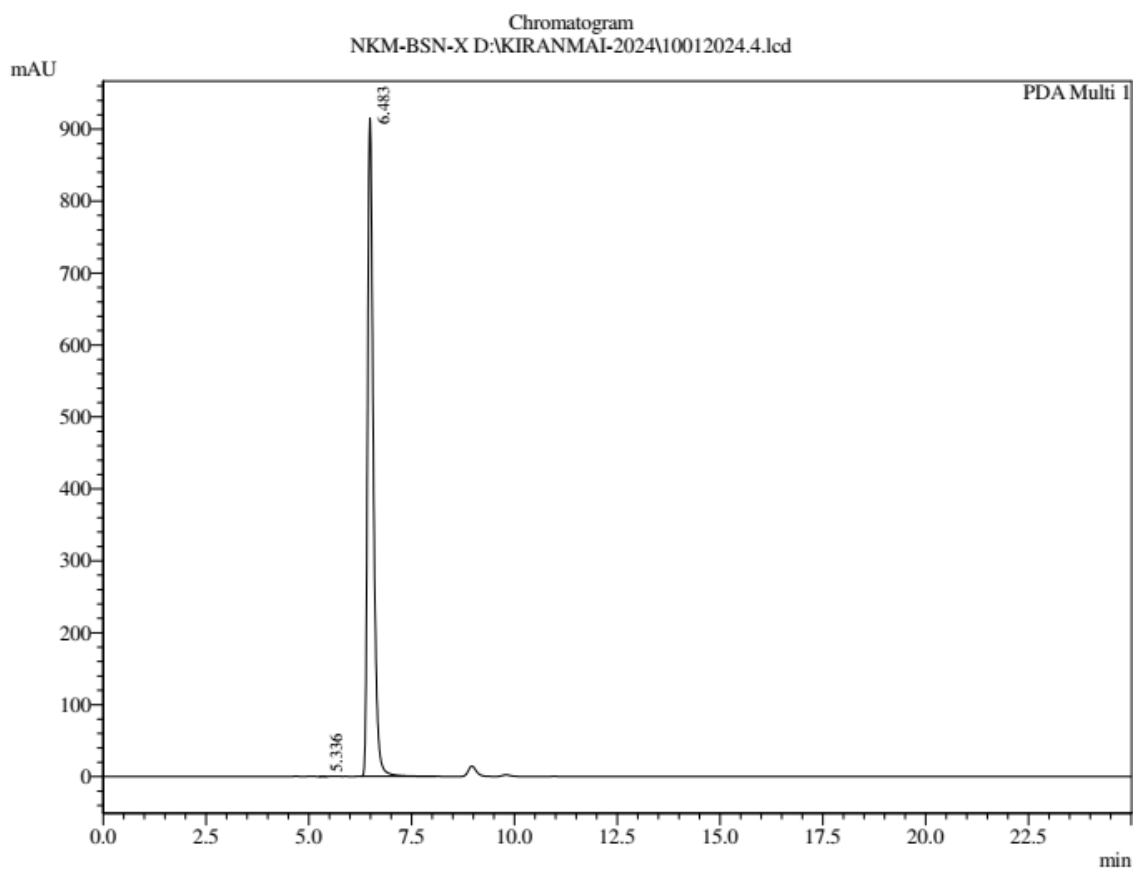

1 PDA Multi 1 / 320nm 4nm

PeakTable

PDA Ch1 320nm 4nm

| Peak# | Ret. Time | Area    | Height | Area %  | Height % |
|-------|-----------|---------|--------|---------|----------|
| 1     | 5.336     | 838     | 147    | 0.009   | 0.016    |
| 2     | 6.483     | 8935358 | 915368 | 99.991  | 99.984   |
| Total |           | 8936196 | 915515 | 100.000 | 100.000  |

# HPLC Chromatogram of Compound 3n (racemic)

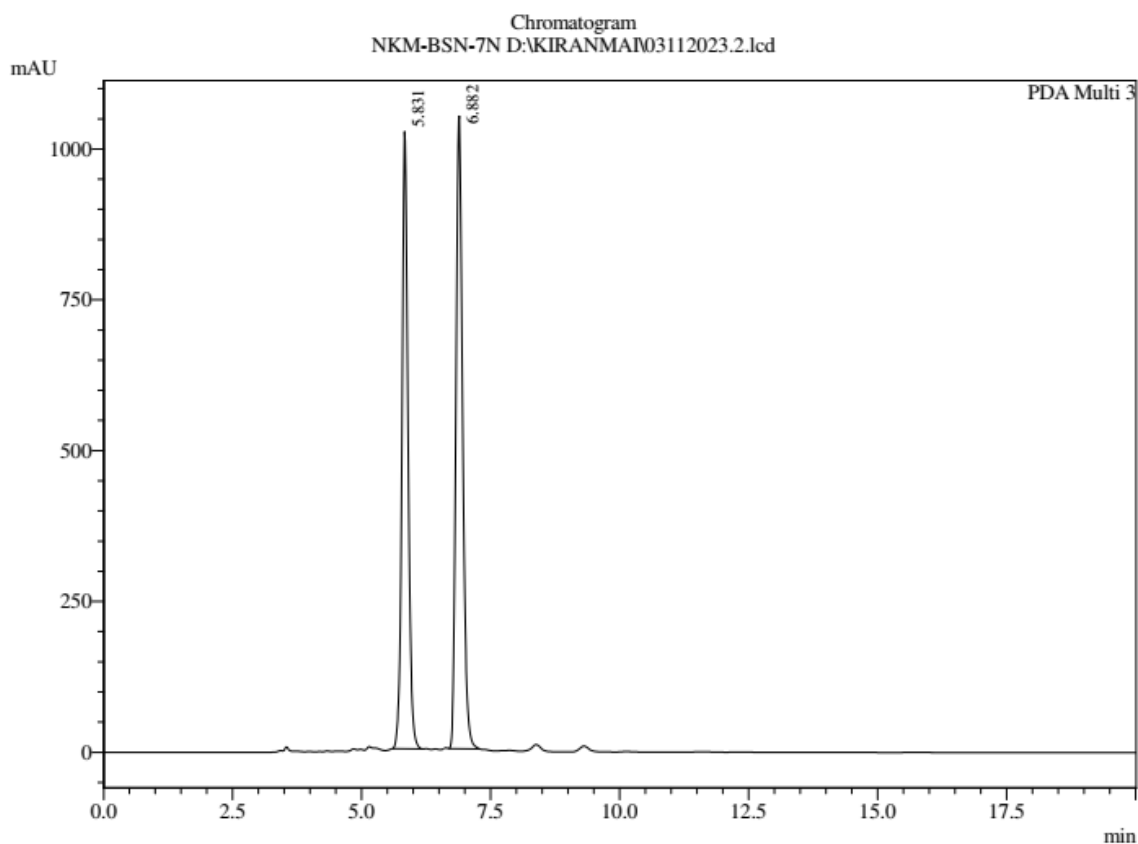

1 PDA Multi 3 / 254nm 4nm

PeakTable

PDA Ch3 254nm 4nm

| Peak# | Ret. Time | Area     | Height  | Area %  | Height % |
|-------|-----------|----------|---------|---------|----------|
| 1     | 5.831     | 8364482  | 1022783 | 46.873  | 49.375   |
| 2     | 6.882     | 9480477  | 1048693 | 53.127  | 50.625   |
| Total |           | 17844959 | 2071476 | 100.000 | 100.000  |

# HPLC Chromatogram of Compound 3n obtained from L2

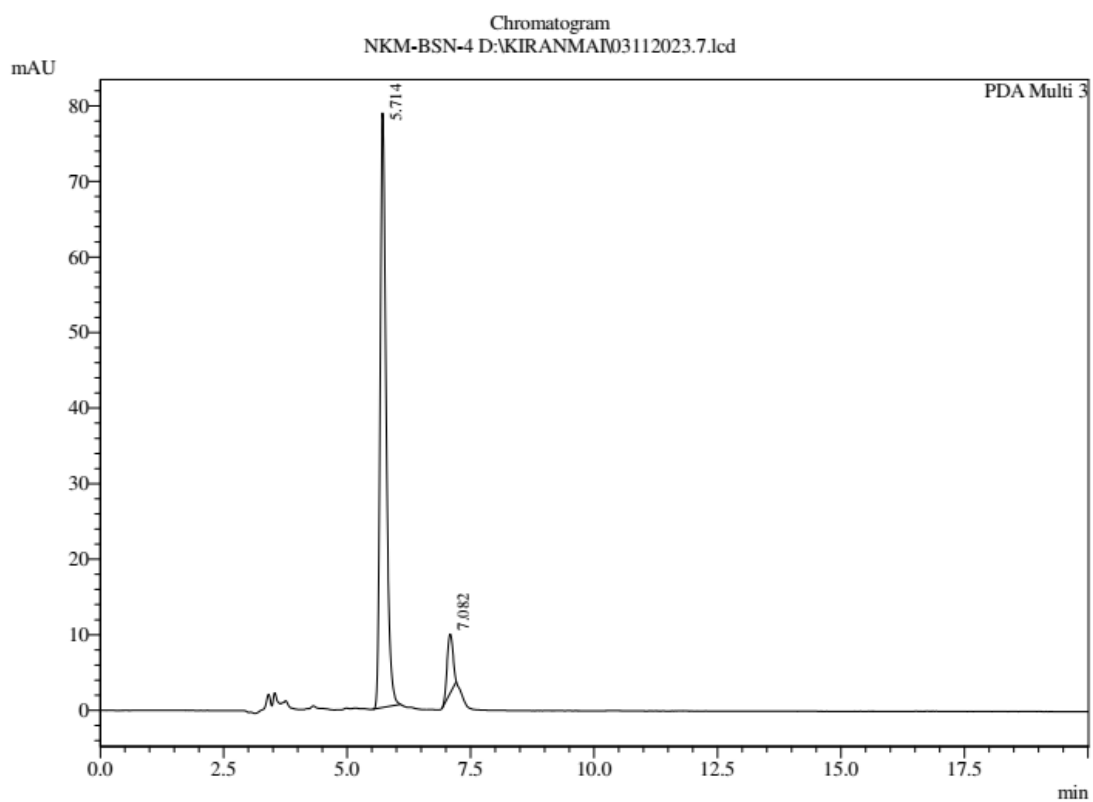

PeakTable

| Peak# | Ret. Time | Area   | Height | Area %  | Height % |
|-------|-----------|--------|--------|---------|----------|
| 1     | 5.714     | 663709 | 78679  | 91.074  | 90.916   |
| 2     | 7.082     | 65053  | 7861   | 8.926   | 9.084    |
| Total |           | 728762 | 86540  | 100.000 | 100.000  |

# HPLC Chromatogram of Compound 3o (racemic)

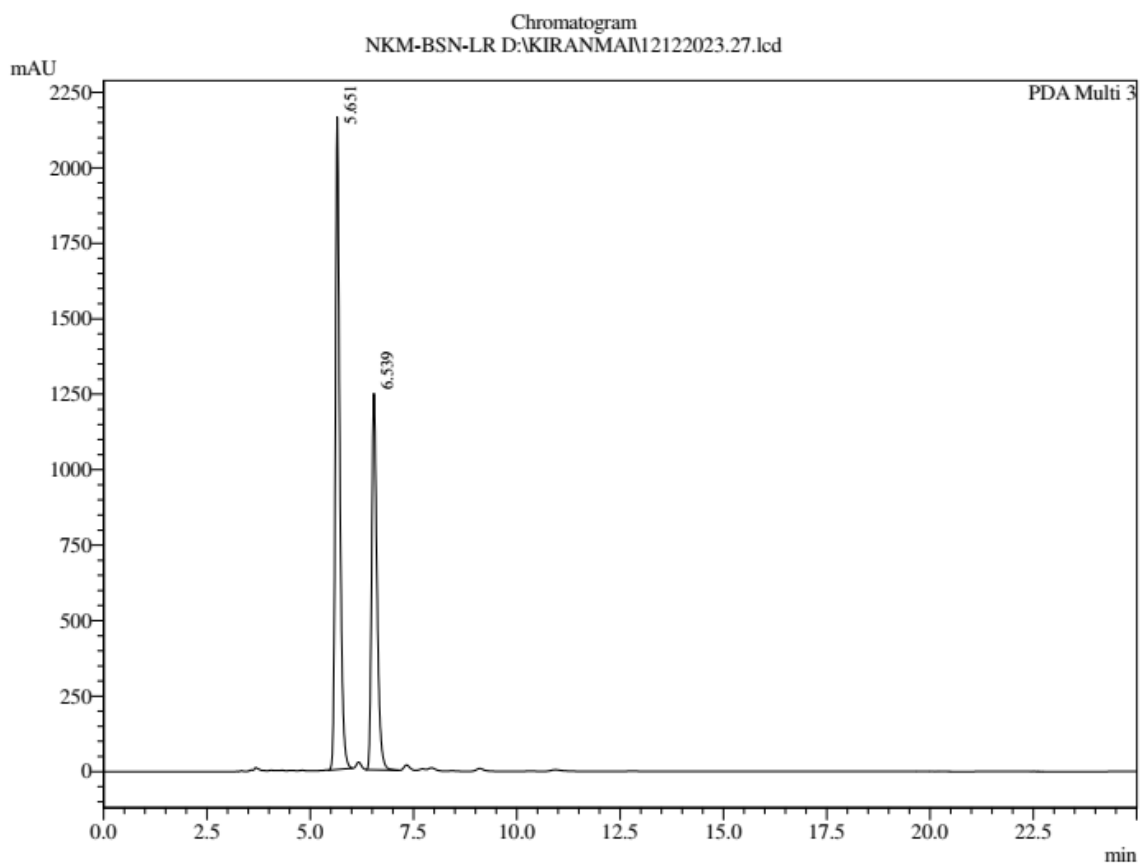

PeakTable

PDA Ch3 254nm 4nm

| Peak# | Ret. Time | Area     | Height  | Area %  | Height % |
|-------|-----------|----------|---------|---------|----------|
| 1     | 5.651     | 16326230 | 2161053 | 59.350  | 63.418   |
| 2     | 6.539     | 11182253 | 1246599 | 40.650  | 36.582   |
| Total |           | 27508483 | 3407652 | 100.000 | 100.000  |

# HPLC Chromatogram of Compound 3o obtained from L2

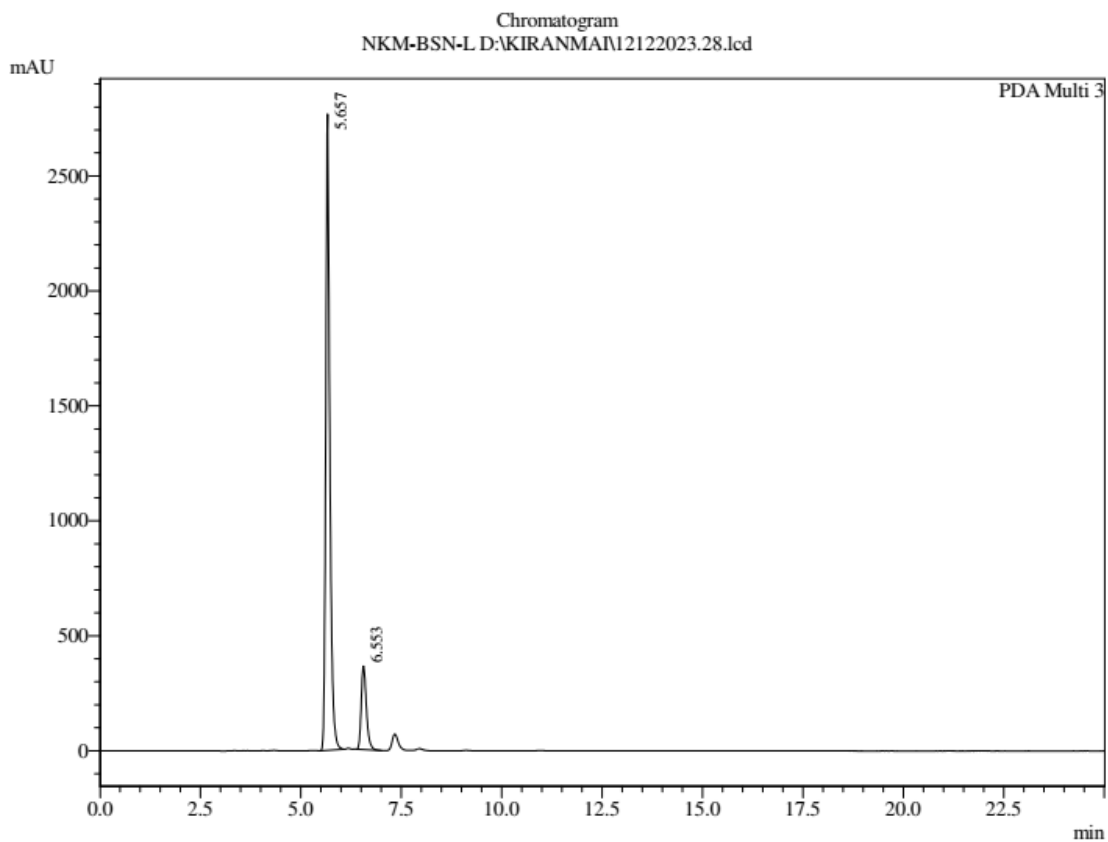

1 PDA Multi 3 / 254nm 4nm

PeakTable

PDA Ch3 254nm 4nm

| Peak# | Ret. Time | Area     | Height  | Area %  | Height % |
|-------|-----------|----------|---------|---------|----------|
| 1     | 5.657     | 19147446 | 2766508 | 85.560  | 88.412   |
| 2     | 6.553     | 3231652  | 362612  | 14.440  | 11.588   |
| Total |           | 22379097 | 3129119 | 100.000 | 100.000  |

# HPLC Chromatogram of Compound 3p (racemic)

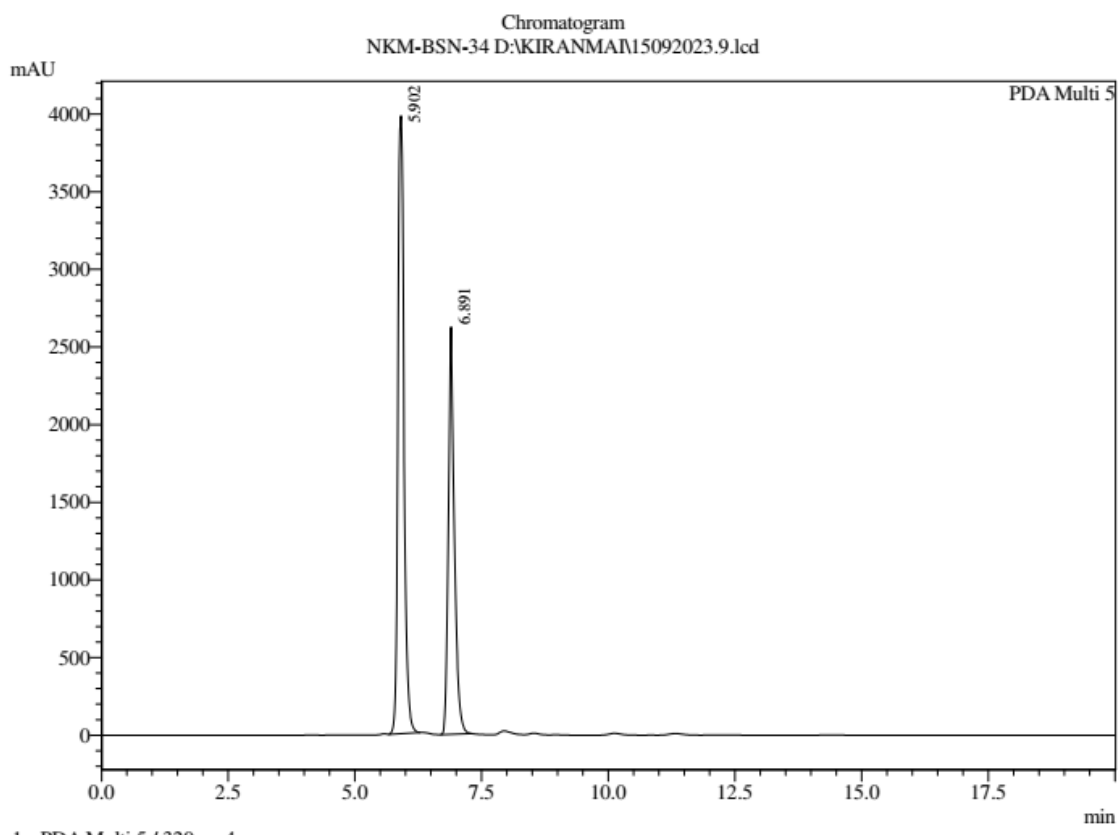

PeakTable

PDA Ch5 320nm 4nm

| Peak# | Ret. Time | Area     | Height  | Area %  | Height % |
|-------|-----------|----------|---------|---------|----------|
| 1     | 5.902     | 32952166 | 3979137 | 60.376  | 60.267   |
| 2     | 6.891     | 21625999 | 2623375 | 39.624  | 39.733   |
| Total |           | 54578165 | 6602512 | 100.000 | 100.000  |



### HPLC Chromatogram of Compound 3p obtained from L2

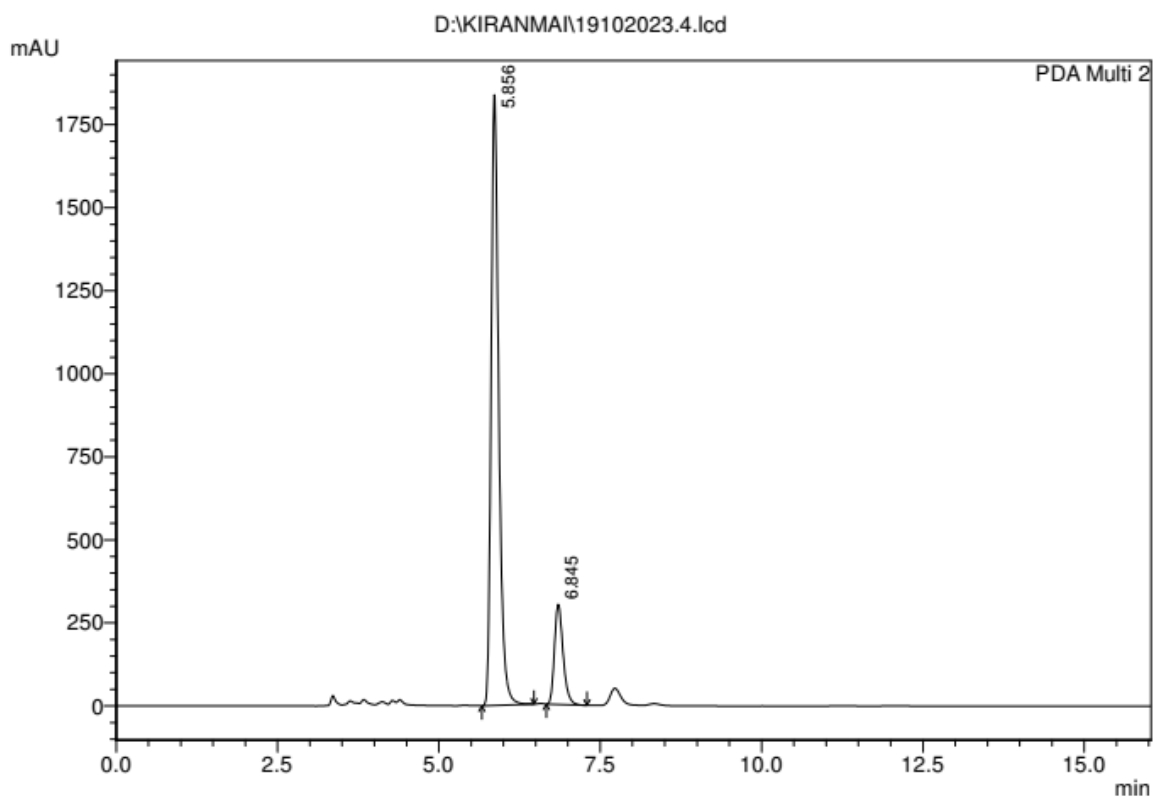

1 PDA Multi 2/225nm 4nm

PeakTable

PDA Ch2 225nm 4nm

| Peak# | Ret. Time | Area     | Height  | Area %  | Height % |
|-------|-----------|----------|---------|---------|----------|
| 1     | 5.856     | 15172908 | 1838381 | 84.283  | 85.897   |
| 2     | 6.845     | 2829528  | 301833  | 15.717  | 14.103   |
| Total |           | 18002436 | 2140214 | 100.000 | 100.000  |

# HPLC Chromatogram of Compound 3q (racemic)

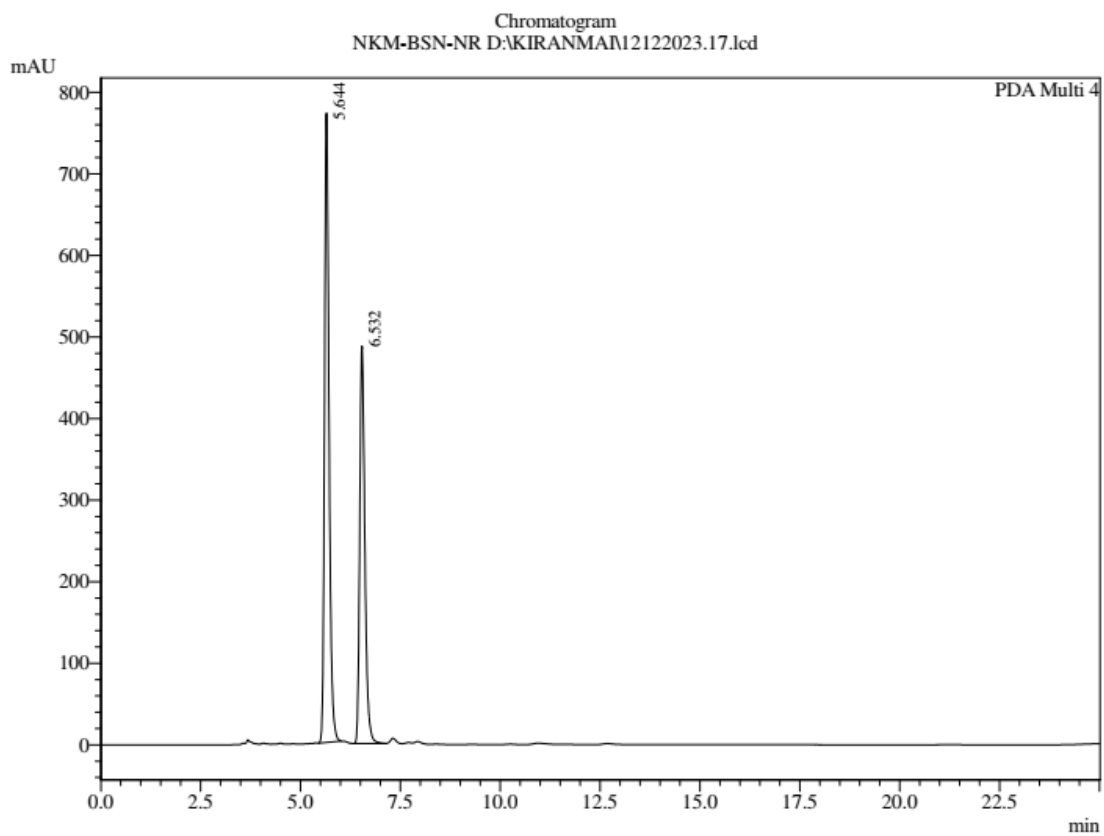

PeakTable

PDA Ch4 280nm 4nm

| Peak# | Ret. Time | Area     | Height  | Area %  | Height % |
|-------|-----------|----------|---------|---------|----------|
| 1     | 5.644     | 6091248  | 771532  | 58.337  | 61.292   |
| 2     | 6.532     | 4350318  | 487252  | 41.663  | 38.708   |
| Total |           | 10441566 | 1258785 | 100.000 | 100.000  |

## HPLC Chromatogram of Compound 3q obtained from L2

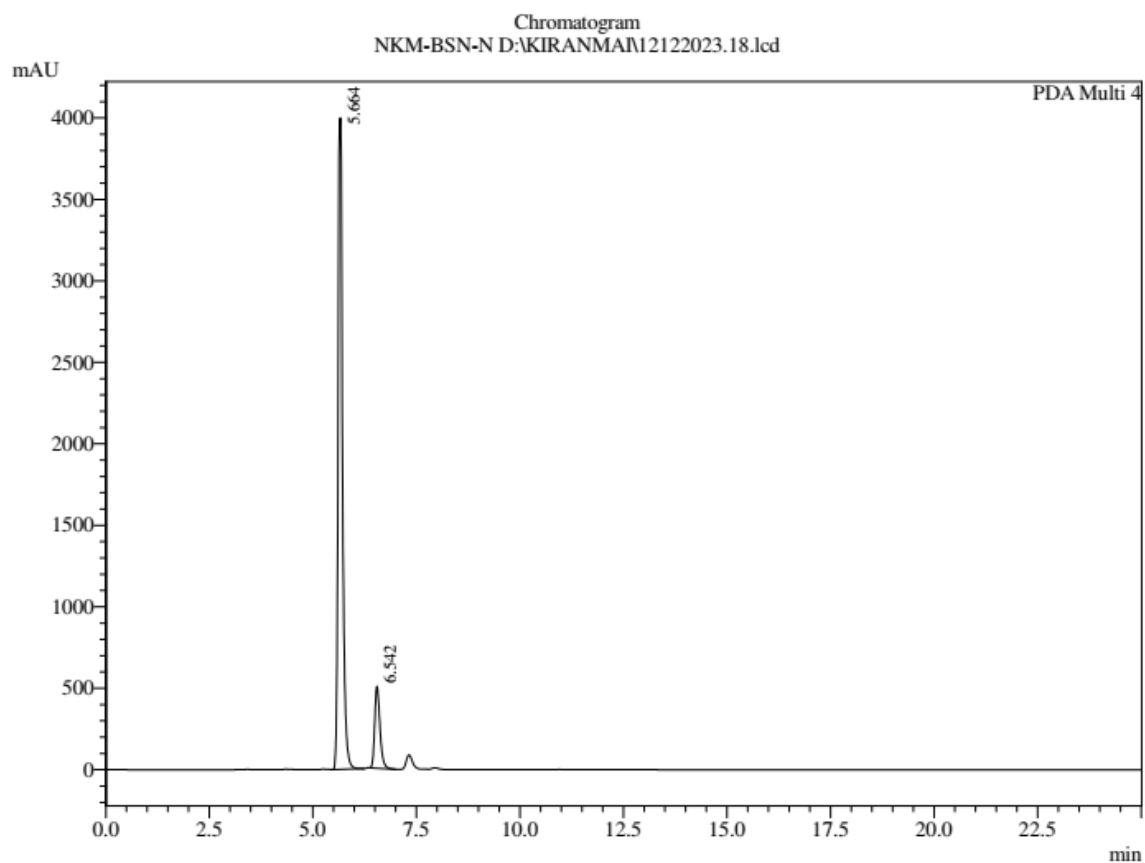

1 PDA Multi 4 / 280nm 4nm

PeakTable

PDA Ch4 280nm 4nm

| Peak# | Ret. Time | Area     | Height  | Area %  | Height % |
|-------|-----------|----------|---------|---------|----------|
| 1     | 5.664     | 29698482 | 3997286 | 87.027  | 88.834   |
| 2     | 6.542     | 4427108  | 502429  | 12.973  | 11.166   |
| Total |           | 34125590 | 4499715 | 100.000 | 100.000  |

# HPLC Chromatogram of Compound 3r (racemic)

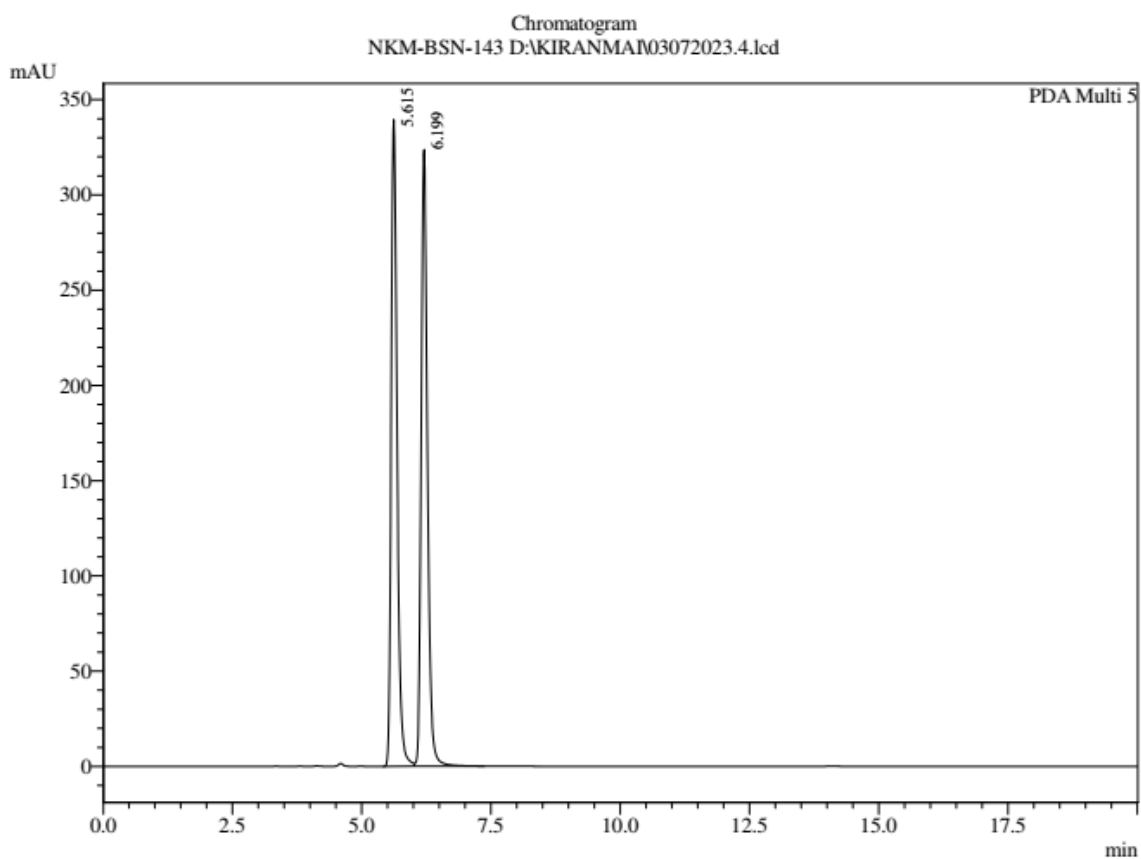

PeakTable

PDA Ch5 320nm 4nm

| Peak# | Ret. Time | Area    | Height | Area %  | Height % |
|-------|-----------|---------|--------|---------|----------|
| 1     | 5.615     | 2698176 | 339512 | 49.657  | 51.192   |
| 2     | 6.199     | 2735444 | 323706 | 50.343  | 48.808   |
| Total |           | 5433620 | 663218 | 100.000 | 100.000  |

## HPLC Chromatogram of Compound 3r obtained from L2

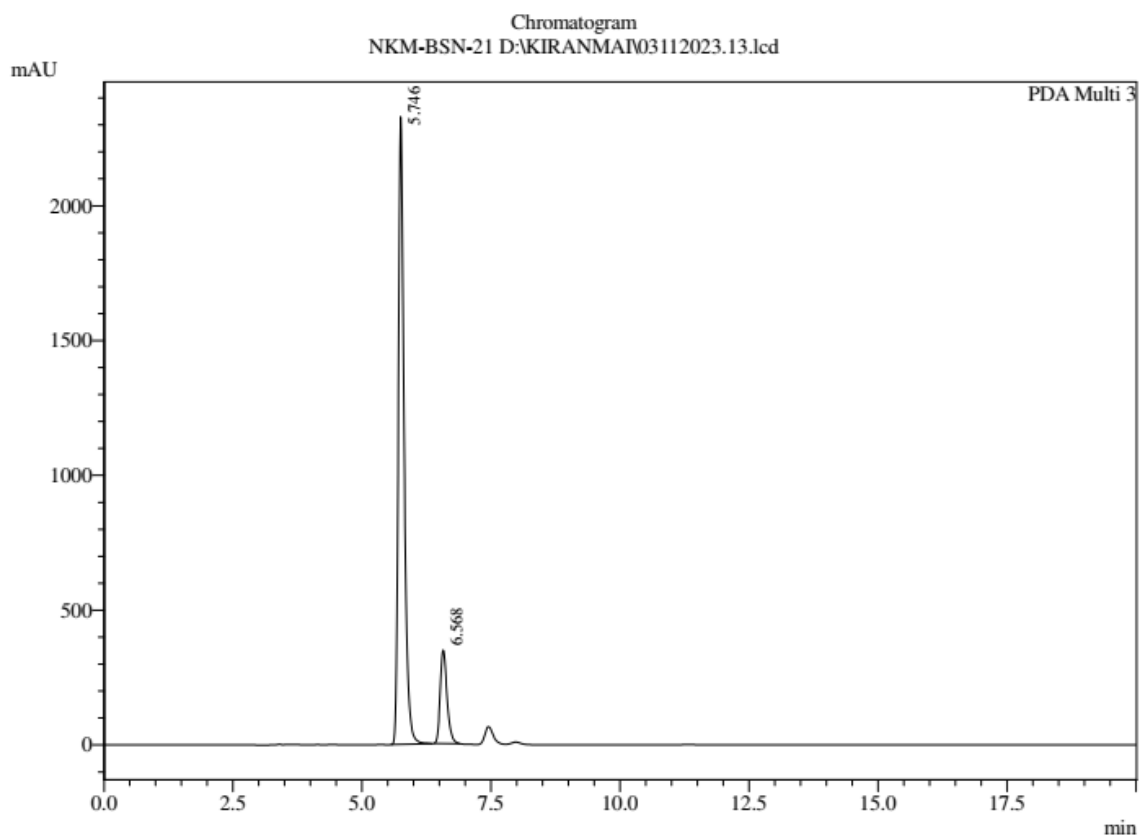

1 PDA Multi 3 / 254nm 4nm

PeakTable

PDA Ch3 254nm 4nm

| Peak# | Ret. Time | Area     | Height  | Area %  | Height % |
|-------|-----------|----------|---------|---------|----------|
| 1     | 5.746     | 17987910 | 2327807 | 84.991  | 87.040   |
| 2     | 6.568     | 3176589  | 346601  | 15.009  | 12.960   |
| Total |           | 21164499 | 2674408 | 100.000 | 100.000  |

# HPLC Chromatogram of Compound 3s (racemic)

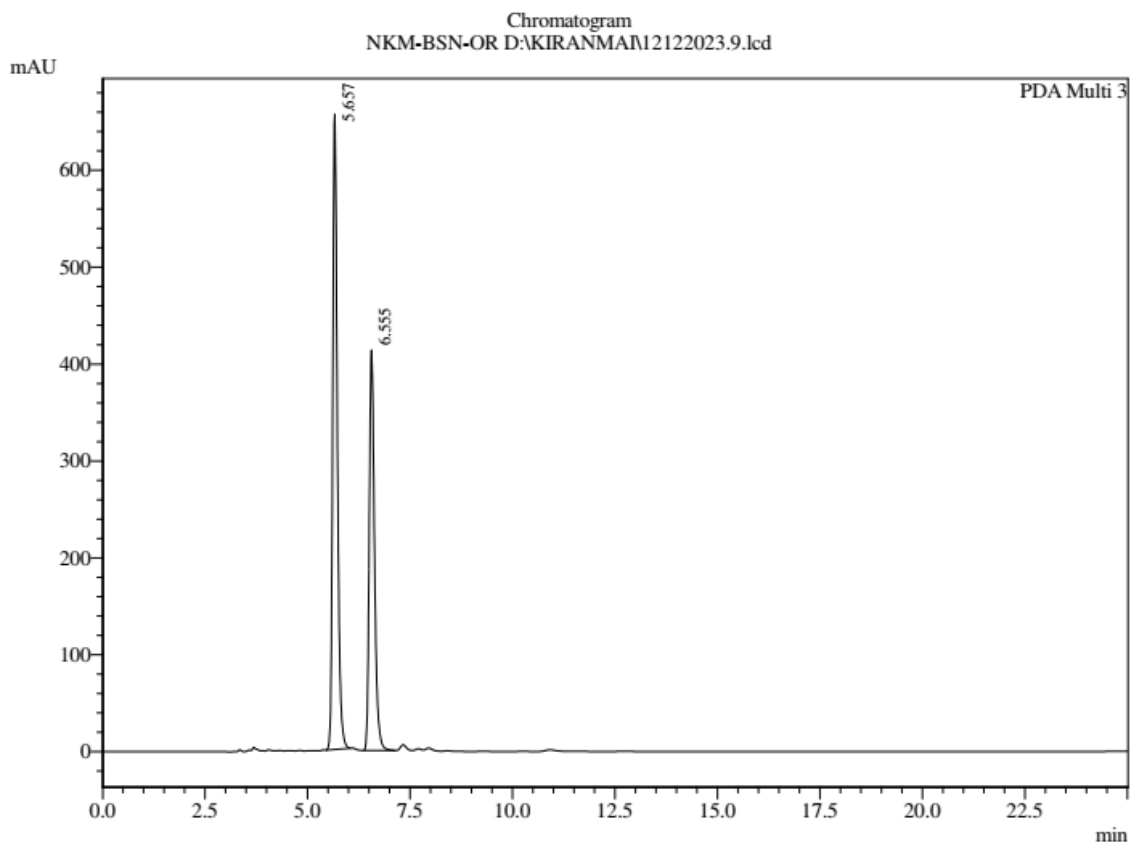

1 PDA Multi 3 / 254nm 4nm

PeakTable

PDA Ch3 254nm 4nm

| Peak# | Ret. Time | Area    | Height  | Area %  | Height % |
|-------|-----------|---------|---------|---------|----------|
| 1     | 5.657     | 5157440 | 655652  | 58.453  | 61.340   |
| 2     | 6.555     | 3665714 | 413223  | 41.547  | 38.660   |
| Total |           | 8823154 | 1068875 | 100.000 | 100.000  |

# HPLC Chromatogram of Compound 3s obtained from L2

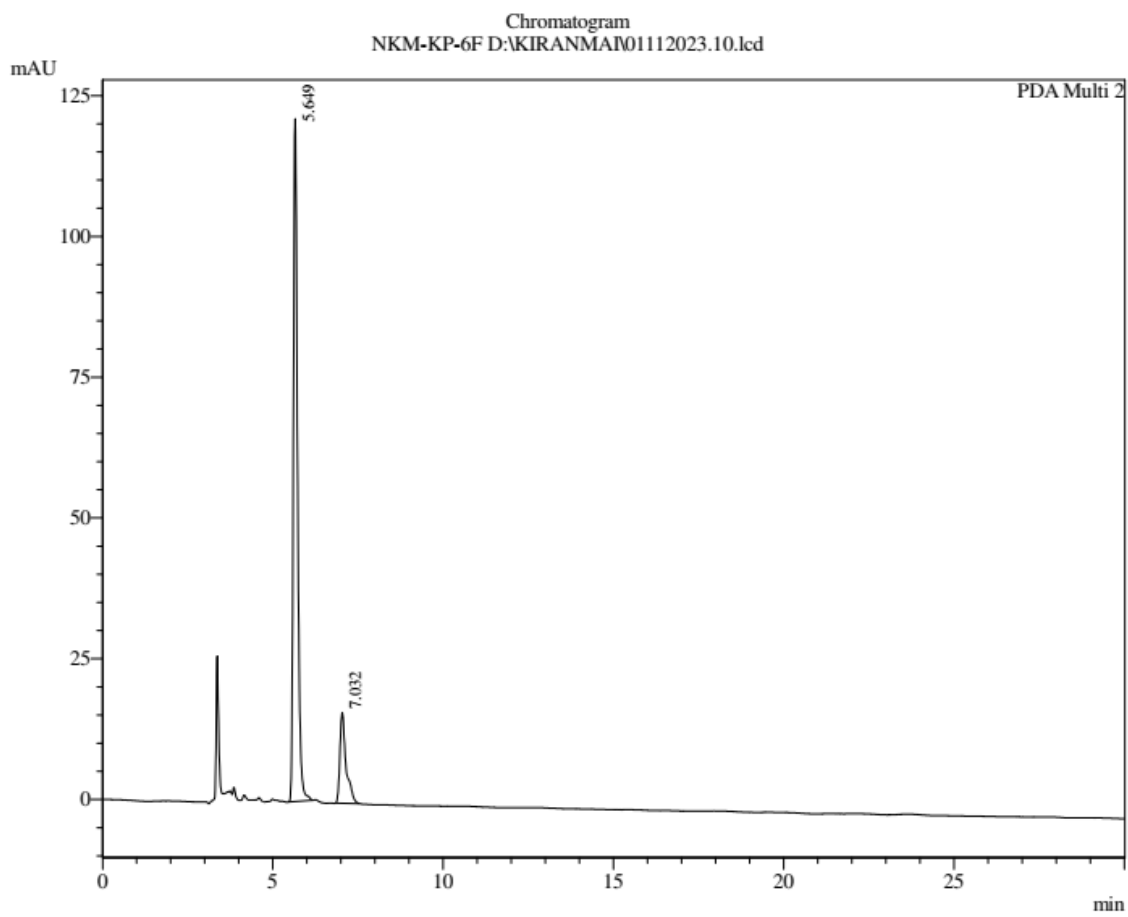

PeakTable

PDA Ch2 225nm 4nm

| Peak# | Ret. Time | Area    | Height | Area %  | Height % |
|-------|-----------|---------|--------|---------|----------|
| 1     | 5.649     | 1026016 | 121212 | 83.491  | 88.272   |
| 2     | 7.032     | 202882  | 16104  | 16.509  | 11.728   |
| Total |           | 1228898 | 137316 | 100.000 | 100.000  |

# HPLC Chromatogram of Compound 3t (racemic)

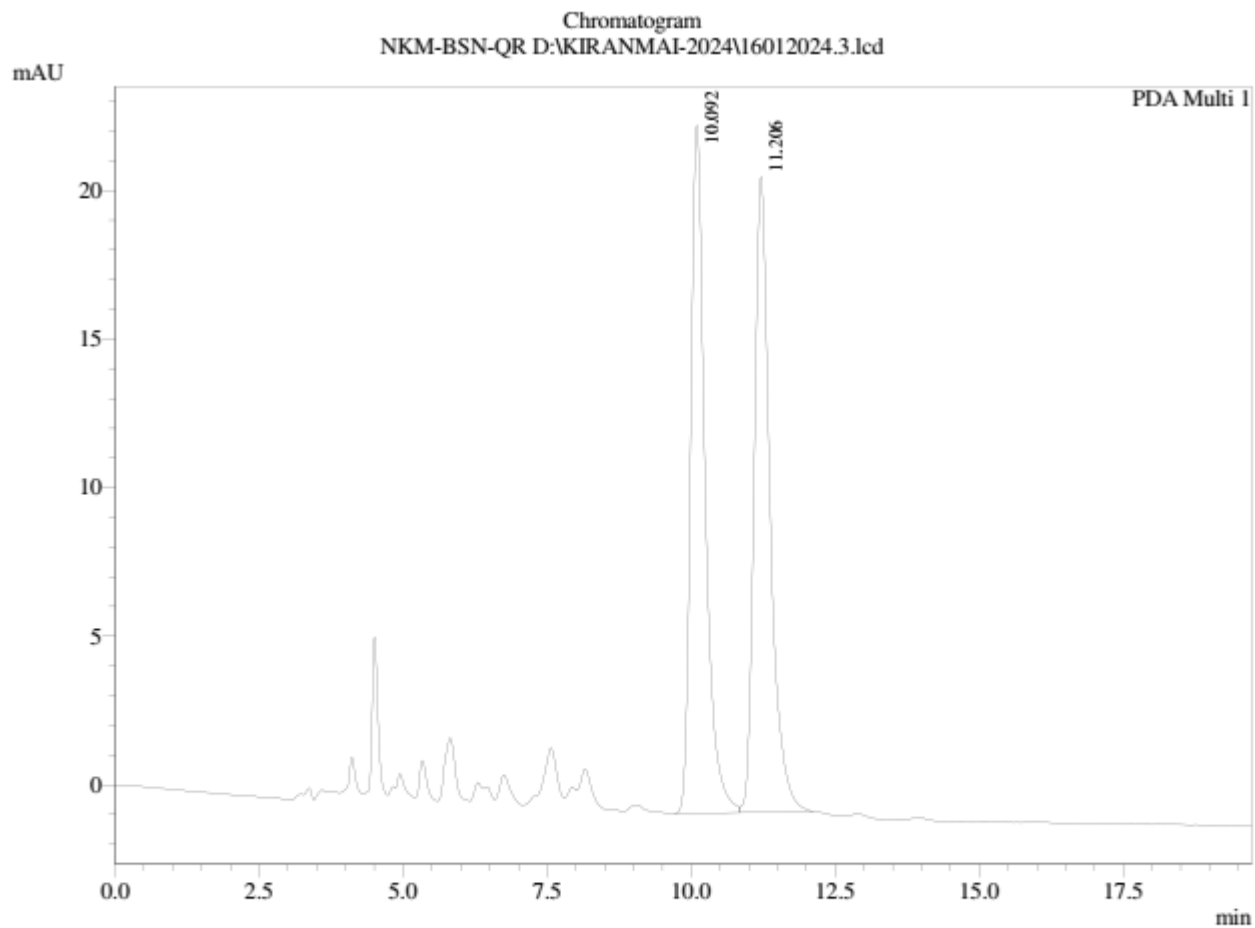

PeakTable

PDA Ch1 320nm 4nm

| Peak# | Ret. Time | Area   | Height | Area %  | Height % |
|-------|-----------|--------|--------|---------|----------|
| 1     | 10.092    | 403757 | 23144  | 49.624  | 51.985   |
| 2     | 11.206    | 409874 | 21377  | 50.376  | 48.015   |
| Total |           | 813632 | 44521  | 100.000 | 100.000  |



# HPLC Chromatogram of Compound 3t obtained from L2

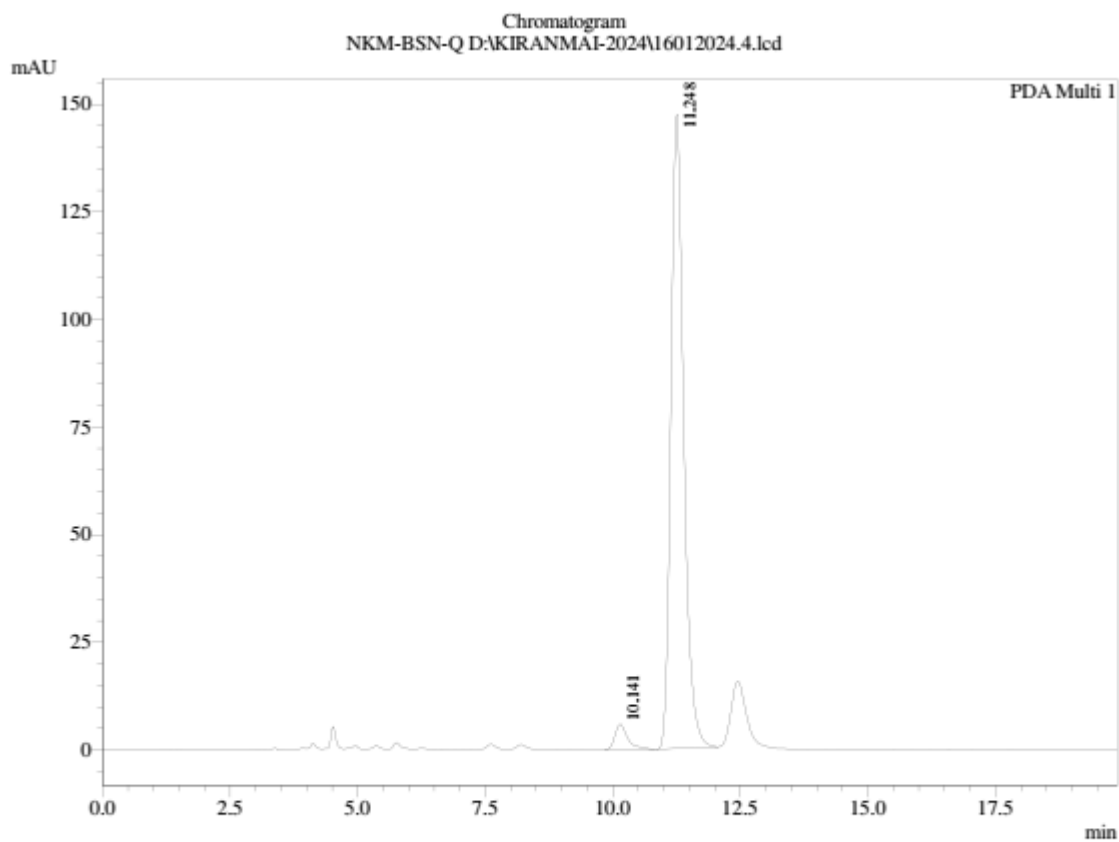

PeakTable

PDA Ch1 320nm 4nm

| Peak# | Ret. Time | Area    | Height | Area %  | Height % |
|-------|-----------|---------|--------|---------|----------|
| 1     | 10.141    | 101359  | 5841   | 3.789   | 3.814    |
| 2     | 11.248    | 2573939 | 147317 | 96.211  | 96.186   |
| Total |           | 2675298 | 153158 | 100.000 | 100.000  |

# HPLC Chromatogram of Compound 3u obtained from L2

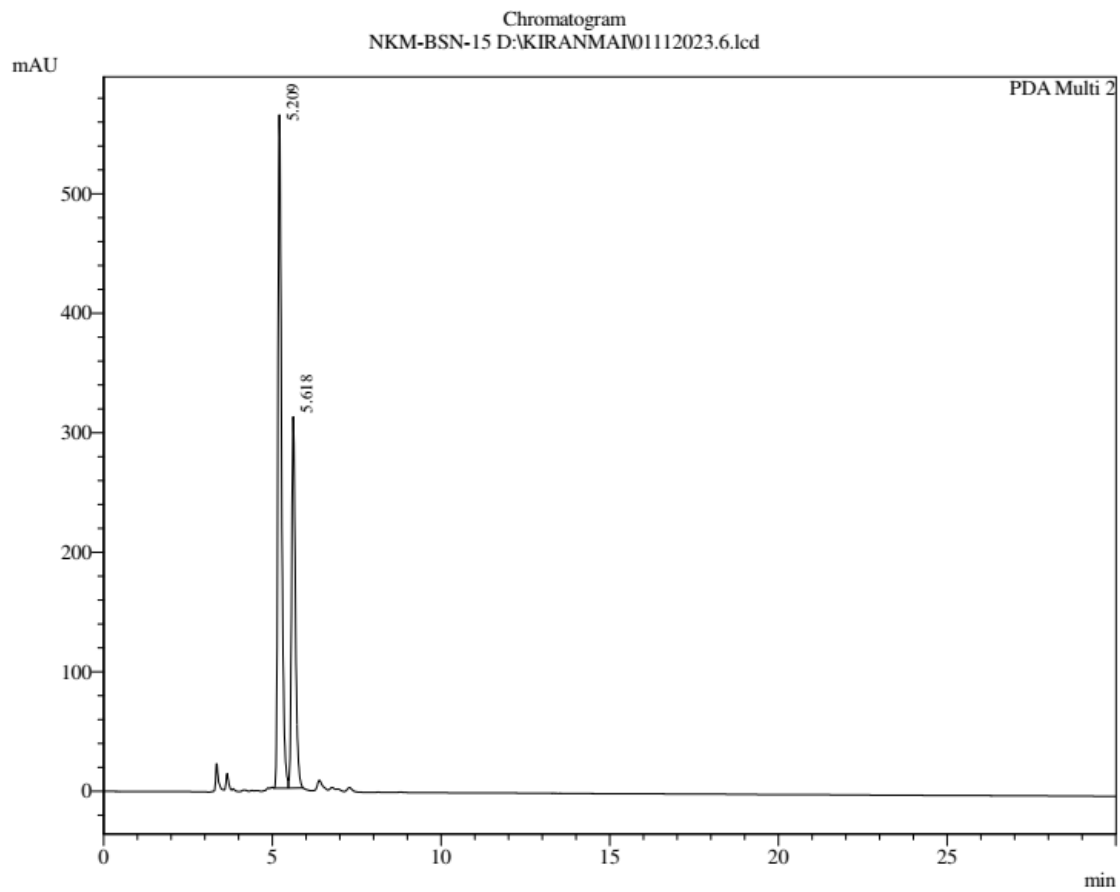

PeakTable

PDA Ch2 225nm 4nm

| Peak# | Ret. Time | Area    | Height | Area %  | Height % |
|-------|-----------|---------|--------|---------|----------|
| 1     | 5.209     | 4281918 | 563449 | 63.822  | 64.450   |
| 2     | 5.618     | 2427226 | 310789 | 36.178  | 35.550   |
| Total |           | 6709144 | 874239 | 100.000 | 100.000  |

## HPLC Chromatogram of Compound 3v obtained from L2

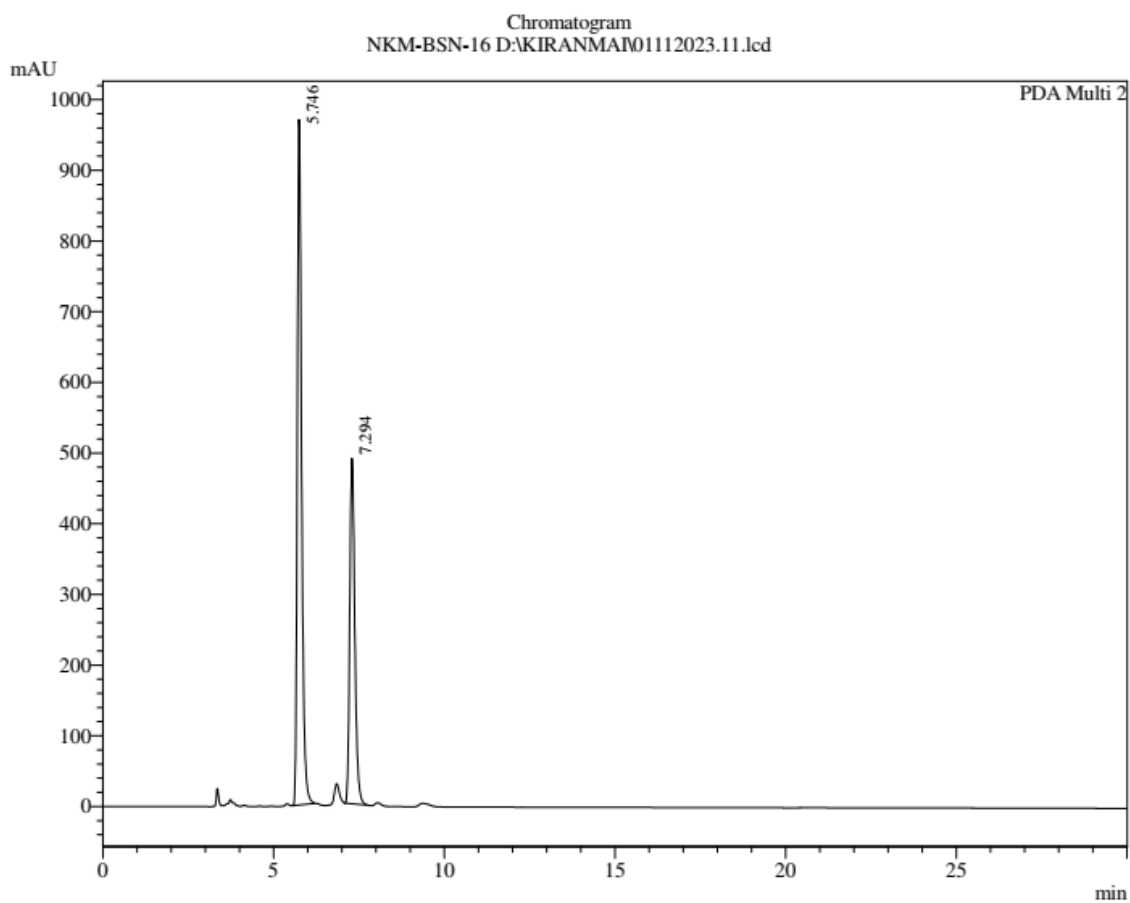

1 PDA Multi 2 / 225nm 4nm

PeakTable

PDA Ch2 225nm 4nm

| Peak# | Ret. Time | Area     | Height  | Area %  | Height % |
|-------|-----------|----------|---------|---------|----------|
| 1     | 5.746     | 8534245  | 969908  | 62.967  | 66.494   |
| 2     | 7.294     | 5019381  | 488724  | 37.033  | 33.506   |
| Total |           | 13553626 | 1458632 | 100.000 | 100.000  |

## HPLC Chromatogram of Compound 3w obtained from L2

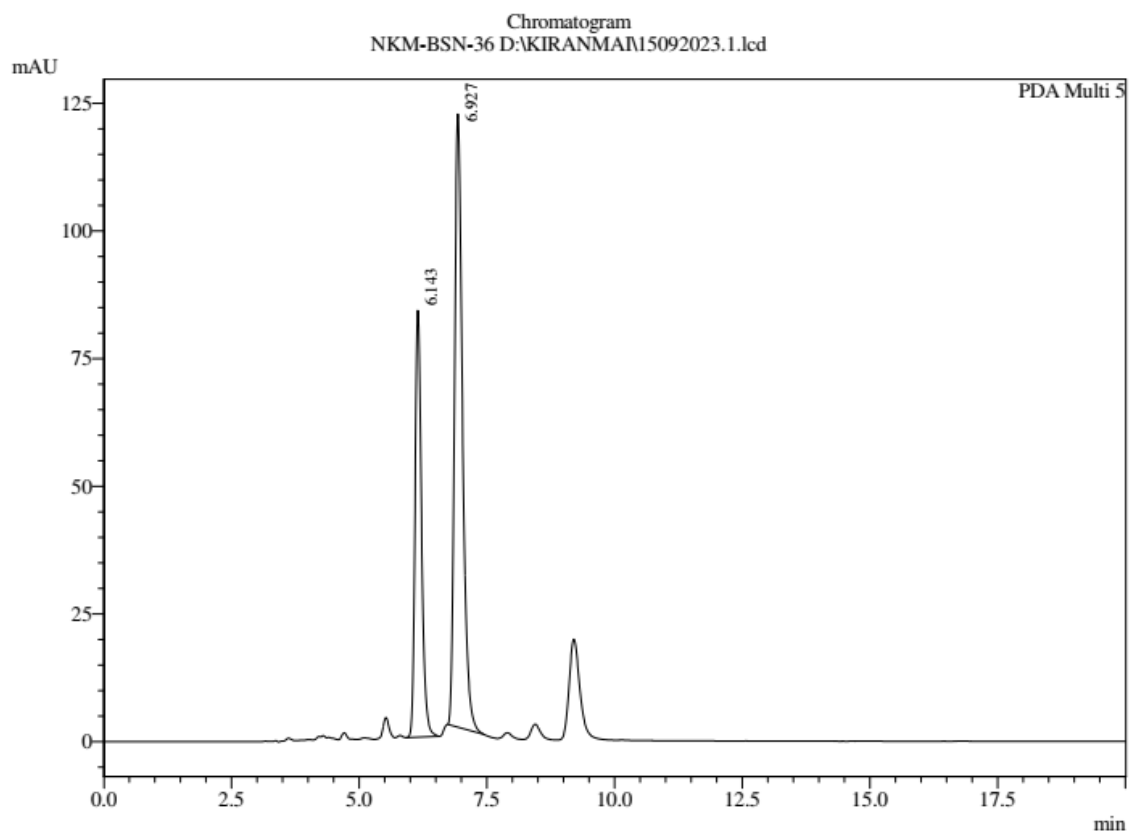

1 PDA Multi 5 / 320nm 4nm

PeakTable

PDA Ch5 320nm 4nm

| Peak# | Ret. Time | Area    | Height | Area %  | Height % |
|-------|-----------|---------|--------|---------|----------|
| 1     | 6.143     | 740061  | 83560  | 36.130  | 41.049   |
| 2     | 6.927     | 1308244 | 120000 | 63.870  | 58.951   |
| Total |           | 2048305 | 203560 | 100.000 | 100.000  |

# HPLC Chromatogram of Compound 5a obtained from L2

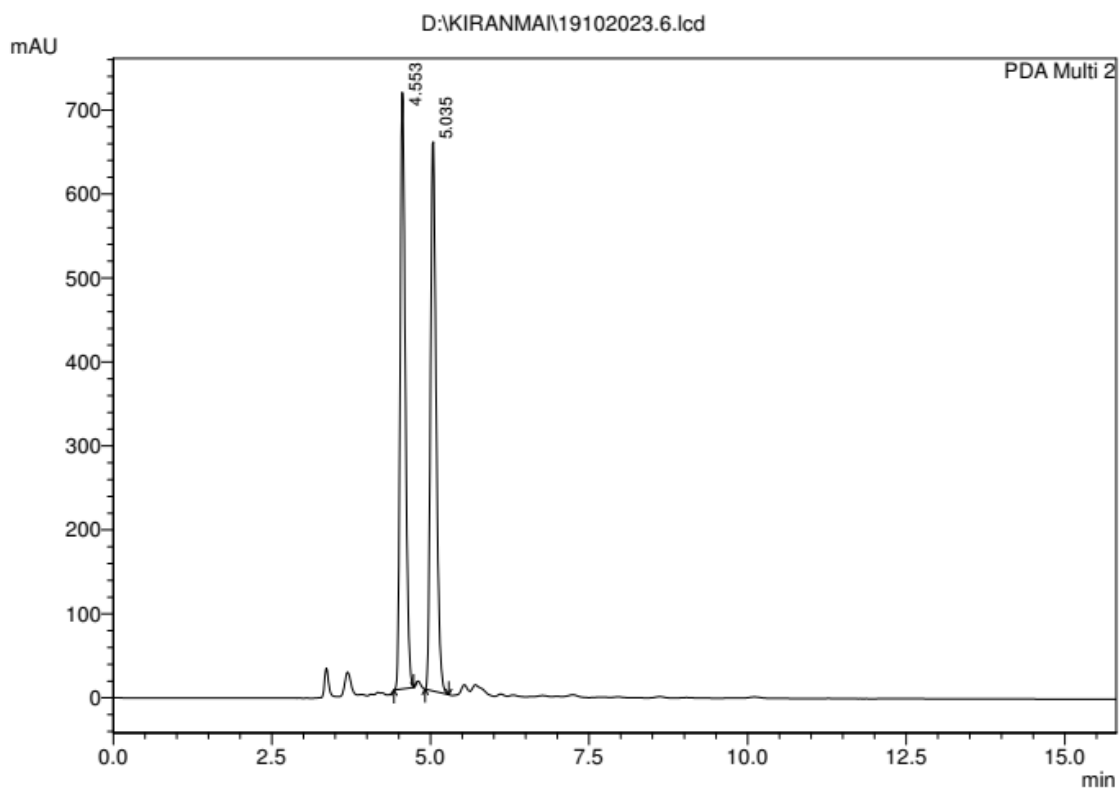

1 PDA Multi 2/225nm 4nm

PeakTable

PDA Ch2 225nm 4nm

| Peak# | Ret. Time | Area    | Height  | Area %  | Height % |
|-------|-----------|---------|---------|---------|----------|
| 1     | 4.553     | 4039894 | 710657  | 49.712  | 52.075   |
| 2     | 5.035     | 4086725 | 654016  | 50.288  | 47.925   |
| Total |           | 8126620 | 1364673 | 100.000 | 100.000  |

# HPLC Chromatogram of Compound 3a obtained from Gram-scale Reaction

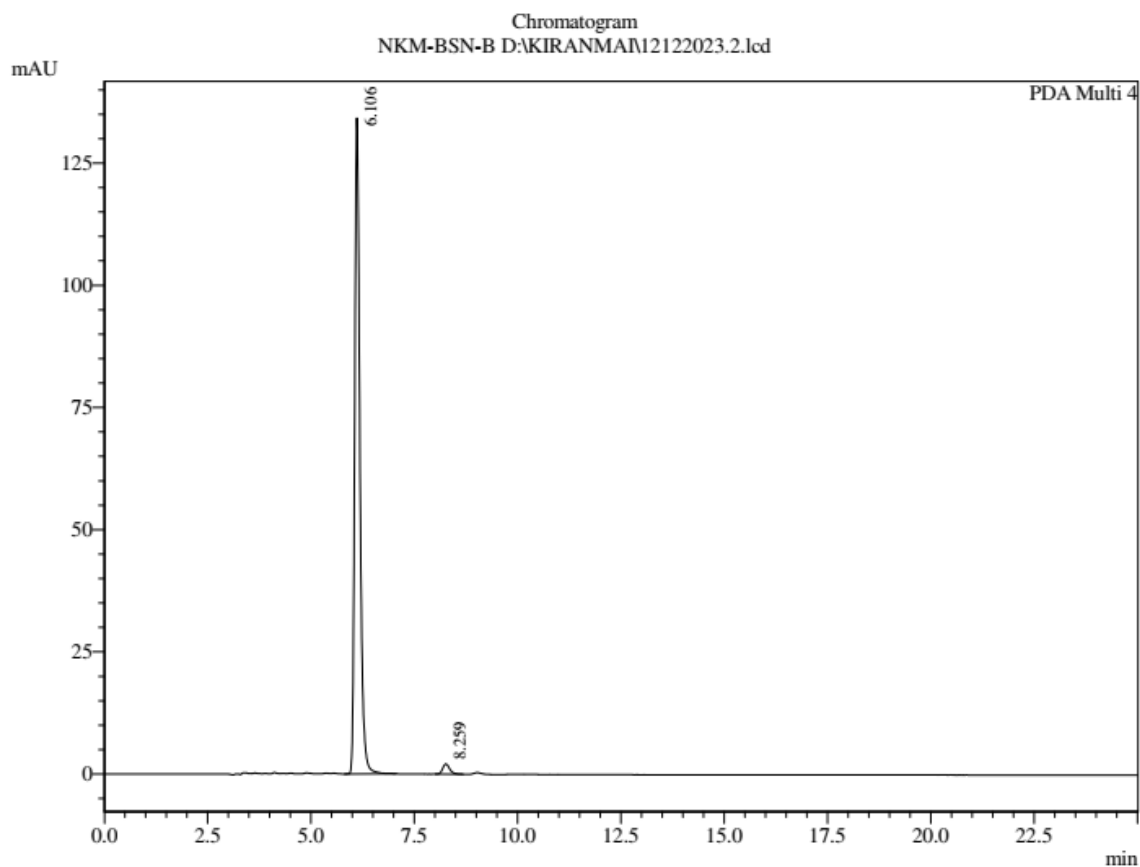

PeakTable

PDA Ch4 280nm 4nm

| Peak# | Ret. Time | Area    | Height | Area %  | Height % |
|-------|-----------|---------|--------|---------|----------|
| 1     | 6.106     | 1174776 | 134213 | 97.929  | 98.469   |
| 2     | 8.259     | 24849   | 2087   | 2.071   | 1.531    |
| Total |           | 1199625 | 136300 | 100.000 | 100.000  |

# HPLC Chromatogram of Compound 5a obtained from Gram-scale Reaction

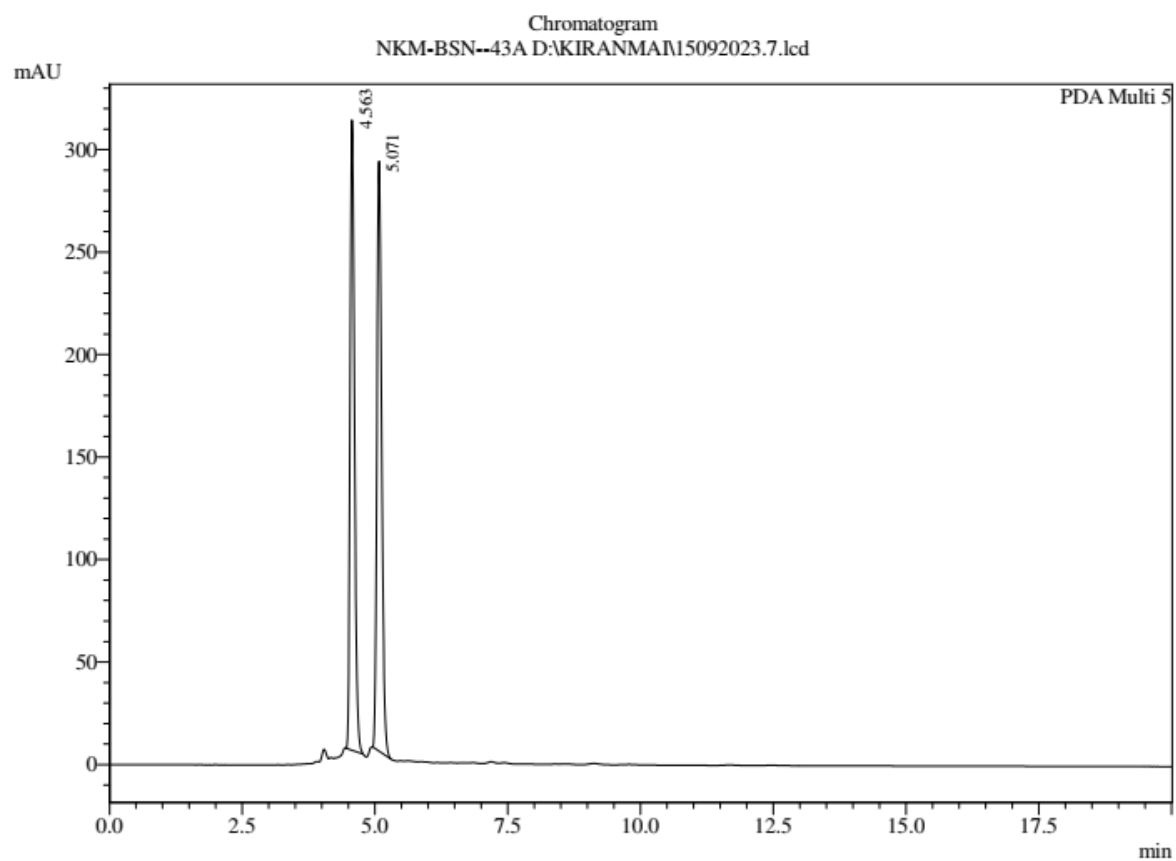

PeakTable

PDA Ch5 320nm 4nm

| Peak# | Ret. Time | Area    | Height | Area %  | Height % |
|-------|-----------|---------|--------|---------|----------|
| 1     | 4.563     | 1751462 | 307359 | 49.514  | 51.655   |
| 2     | 5.071     | 1785830 | 287669 | 50.486  | 48.345   |
| Total |           | 3537293 | 595027 | 100.000 | 100.000  |

# HPLC Chromatogram of Compound 6

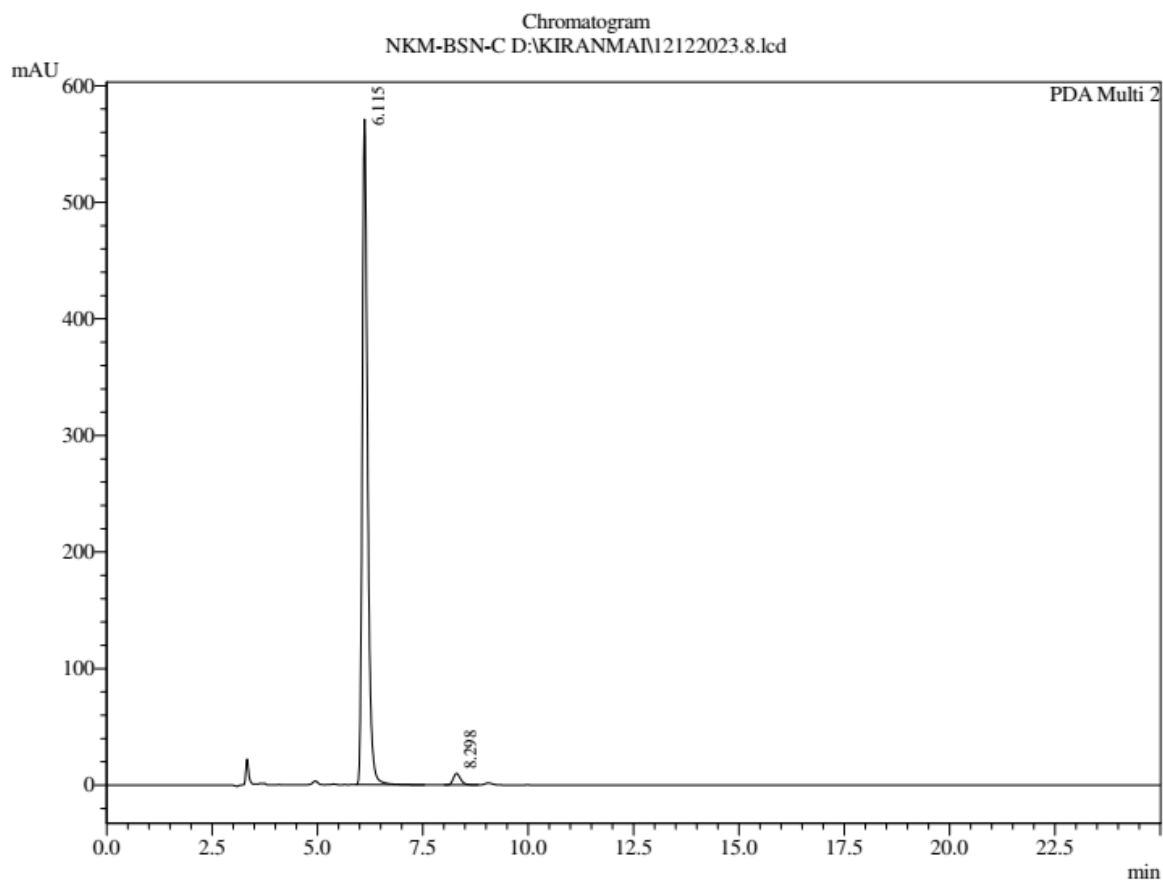

1 PDA Multi 2 / 225nm 4nm

PeakTable

PDA Ch2 225nm 4nm

| Peak# | Ret. Time | Area    | Height | Area %  | Height % |
|-------|-----------|---------|--------|---------|----------|
| 1     | 6.115     | 5043142 | 570842 | 97.670  | 98.296   |
| 2     | 8.298     | 120298  | 9895   | 2.330   | 1.704    |
| Total |           | 5163440 | 580737 | 100.000 | 100.000  |



# HPLC Chromatogram of Compound 7

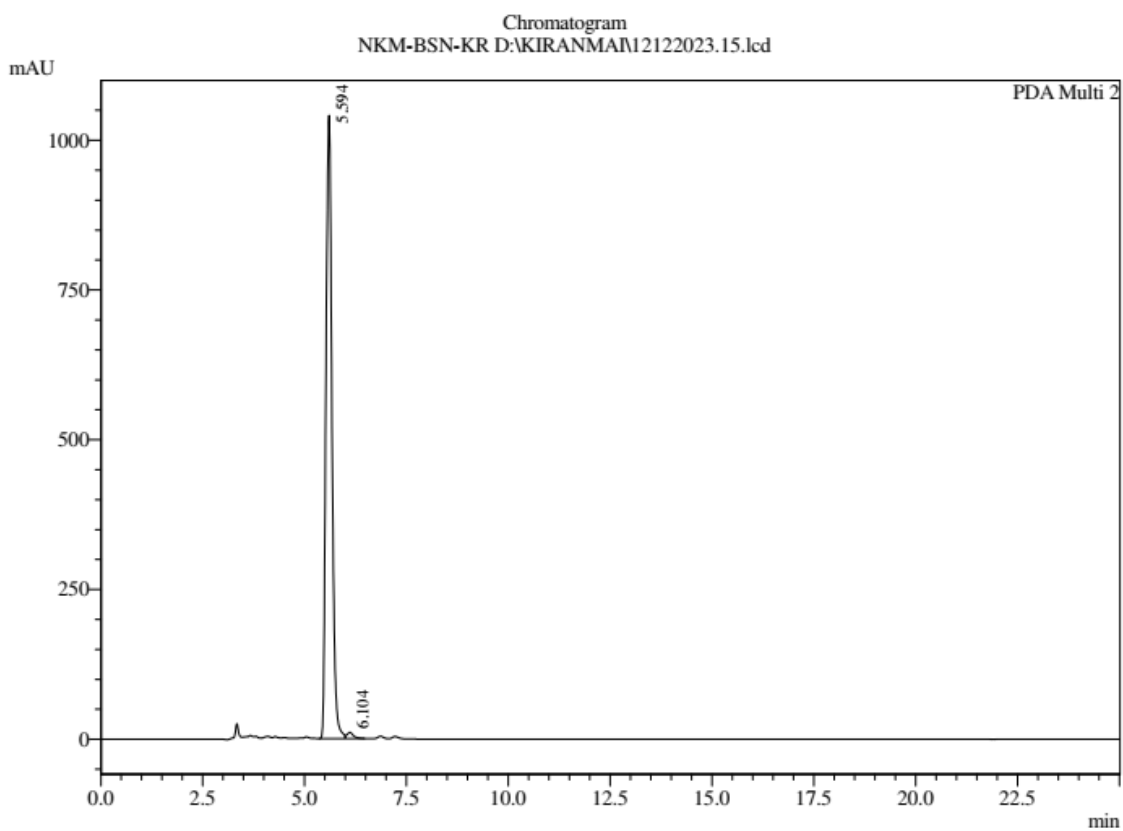

1 PDA Multi 2 / 225nm 4nm

PeakTable

PDA Ch2 225nm 4nm

| Peak# | Ret. Time | Area     | Height  | Area %  | Height % |
|-------|-----------|----------|---------|---------|----------|
| 1     | 5.594     | 10629879 | 1040659 | 98.924  | 99.019   |
| 2     | 6.104     | 115587   | 10313   | 1.076   | 0.981    |
| Total |           | 10745465 | 1050972 | 100.000 | 100.000  |

## 6. X-ray crystallographic data of compound 3b

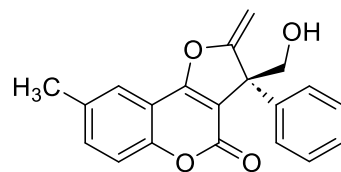

**Structure of compound 3b**

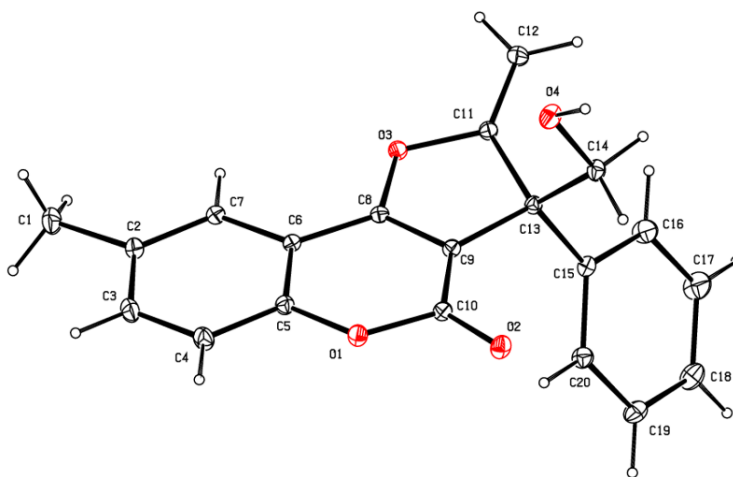

**Figure S1.** ORTEP diagram of compound **3b** with the atom-numbering. Displacement ellipsoids are drawn at the 30% probability level and H atoms are shown as small spheres of arbitrary radius.

**Crystallization of 3b:** To a mixture of compound **3b** (10 mg) and DCM (2 mL) in a culture vial. The vial was covered with perforated aluminium foil and left aside for 2 days for crystal growth. After slow evaporation of the solvent, off-white crystals were obtained.

X-ray data for the compound was collected at room temperature on a Bruker D8 QUEST instrument with an I $\mu$ S Mo microsource ( $\lambda = 0.7107$  Å) and a PHOTON-III detector. The raw data frames were reduced and corrected for absorption effects using the Bruker Apex 3 software suite programs [1]. The structure was solved using intrinsic phasing method [2] and further refined with the SHELXL [2] program and expanded using Fourier techniques. Anisotropic displacement parameters were included for all non-hydrogen atoms. The O-H atoms were located in the difference Fourier map and its positions and isotropic displacement parameters were refined. All C bound H atoms were positioned geometrically and treated as riding on their parent C atoms [C-H = 0.93-0.97 Å, and U<sub>iso</sub>(H) = 1.5U<sub>eq</sub>(C) for methyl H or 1.2U<sub>eq</sub>(C) for other H atoms].

### Crystal structure determination of 3b

**Crystal Data** for  $C_{20}H_{16}O_4$  ( $M = 320.33$  g/mol): orthorhombic, space group  $P2_12_12_1$  (no. 19),  $a = 9.7289(7)$  Å,  $b = 11.5281(9)$  Å,  $c = 13.9318(10)$  Å,  $V = 1562.5(2)$  Å<sup>3</sup>,  $Z = 4$ ,  $T = 294.15$  K,  $\mu(\text{MoK}\alpha) = 0.095$  mm<sup>-1</sup>,  $D_{\text{calc}} = 1.362$  g/cm<sup>3</sup>, 26531 reflections measured ( $4.586^\circ \leq 2\theta \leq 60.99^\circ$ ), 4605 unique ( $R_{\text{int}} = 0.0500$ ,  $R_{\text{sigma}} = 0.0336$ ) which were used in all calculations. The final  $R_1$  was 0.0391 ( $I > 2\sigma(I)$ ) and  $wR_2$  was 0.1088 (all data). **CCDC 2308383** deposition numbers contains the supplementary crystallographic data for this paper which can be obtained free of charge at <https://www.ccdc.cam.ac.uk/structures/>.

1. Bruker (2016). APEX3, SAINT and SADABS. Bruker AXS, Inc., Madison, Wisconsin, USA.
2. Sheldrick G. M. (2015) Acta Crystallogr C71: 3-8.
